# Supplementary material
Source: PubMed Central journal article supplement (PMC5859247)
Supplement: jo8b00028_si_001.pdf [file jo8b00028_si_001.pdf]

# Supporting Information

## The Samholides, Swinholide Related Metabolites from a Marine Cyanobacterium cf. *Phormidium* sp.

Yiwen Tao, Pinglin Li, Daojing Zhang, Evgenia Glukhov, Lena Gerwick, Chen Zhang, Thomas F. Murray, William H. Gerwick

*Guangzhou Medical University, Guangzhou 511436, People's Republic of China*

*Key Laboratory of Marine Drugs, Chinese Ministry of Education, School of Medicine and*

*Pharmacy, Ocean University of China, Qingdao 266003, People's Republic of China*

*Laboratory for Marine Drugs and Bioproducts of Qingdao National Laboratory for Marine Science and Technology, Qingdao 266235, People's Republic of China*

*Center for Marine Biotechnology and Biomedicine, Scripps Institution of Oceanography, University of California San Diego, La Jolla, California 92093, United States*

*State Key Laboratory of Bioreactor Engineering, East China University of Science & Technology, Shanghai 200237, People's Republic of China*

*Department of Pharmacology, Creighton University School of Medicine, Omaha, Nebraska 68178, United States*

*Skaggs School of Pharmacy and Pharmaceutical Sciences, University of California San Diego, La Jolla, California 92093, United States*

### Table of Contents

#### Tables

Table S1 <sup>13</sup>C NMR data comparison of samholide A (1), swinholide A and ankaraholide A

Table S2 <sup>1</sup>H NMR data comparison of samholide A (1), swinholide A and ankaraholide A

Table S3 NMR data for samholide B (2)

Table S4 NMR data for samholide C (3)

Table S5 NMR data for samholide D (4)

Table S6 NMR data for samholide E (5)

Table S7 NMR data for samholide F (6)

Table S8 NMR data for samholide G (7)

Table S9 NMR data for samholide H (8)

Table S10 NMR data for samholide I (9)

#### Figures

Figure S1 The ESI MS spectrum of samholide A (1)

Figure S2 The ESI MS<sup>2</sup> spectrum of samholide A (1)

Figure S3 The positive HRESIMS spectrum of samholide A (1)

Figure S4 <sup>1</sup>H NMR (600 MHz, DMSO) spectrum of samholide A (1)

- Figure S5 Amplified  $^1\text{H}$  NMR (600 MHz, DMSO) spectrum of samholide A (1)
- Figure S6  $^{13}\text{C}$  NMR (150 MHz, DMSO) spectrum of samholide A (1)
- Figure S7 Amplified  $^{13}\text{C}$  NMR (150 MHz, DMSO) spectrum of samholide A (1)
- Figure S8 DEPT spectrum of samholide A (1)
- Figure S9  $^1\text{H}$ - $^1\text{H}$  COSY spectrum of samholide A (1)
- Figure S10 HMBC spectrum of samholide A (1)
- Figure S11 Amplified HMBC spectrum of samholide A (1)
- Figure S12 HMQC spectrum of samholide A (1)
- Figure S13 HSQC-TOCSY spectrum of samholide A (1)
- Figure S14 ROESY spectrum of samholide A (1)
- Figure S15 Amplified ROESY spectrum of samholide A (1)
- Figure S16 The ESI MS spectrum of samholide B (2)
- Figure S17 The ESI MS<sup>2</sup> spectrum of samholide B (2)
- Figure S18 The positive HRESIMS spectrum of samholide B (2)
- Figure S19  $^1\text{H}$  NMR (600 MHz, DMSO) spectrum of samholide B (2)
- Figure S20  $^{13}\text{C}$  NMR (150 MHz, DMSO) spectrum of samholide B (2)
- Figure S21 DEPT spectrum of samholide B (2)
- Figure S22  $^1\text{H}$ - $^1\text{H}$  COSY spectrum of samholide B (2)
- Figure S23 HMBC spectrum of samholide B (2)
- Figure S24 HMQC spectrum of samholide B (2)
- Figure S25 HSQC-TOCSY spectrum of samholide B (2)
- Figure S26 ROESY spectrum of samholide B (2)
- Figure S27 The ESI MS spectrum of samholide C (3)
- Figure S28 The ESI MS<sup>2</sup> spectrum of samholide C (3)
- Figure S29 The positive HRESIMS spectrum of samholide C (3)
- Figure S30  $^1\text{H}$  NMR (600 MHz, DMSO) spectrum of samholide C (3)
- Figure S31  $^{13}\text{C}$  NMR (150 MHz, DMSO) spectrum of samholide C (3)
- Figure S32 DEPT spectrum of samholide C (3)
- Figure S33  $^1\text{H}$ - $^1\text{H}$  COSY spectrum of samholide C (3)
- Figure S34 HMBC spectrum of samholide C (3)
- Figure S35 HMQC spectrum of samholide C (3)
- Figure S36 HSQC-TOCSY spectrum of samholide C (3)
- Figure S37 ROESY spectrum of samholide C (3)
- Figure S38 The ESI MS spectrum of samholide D (4)
- Figure S39 The ESI MS<sup>2</sup> spectrum of samholide D (4)
- Figure S40 The positive HRESIMS spectrum of samholide D (4)
- Figure S41  $^1\text{H}$  NMR (600 MHz, DMSO) spectrum of samholide D (4)
- Figure S42  $^{13}\text{C}$  NMR (150 MHz, DMSO) spectrum of samholide D (4)
- Figure S43  $^1\text{H}$ - $^1\text{H}$  COSY spectrum of samholide D (4)
- Figure S44 HMBC spectrum of samholide D (4)
- Figure S45 HMQC spectrum of samholide D (4)
- Figure S46 HSQC-TOCSY spectrum of samholide D (4)
- Figure S47 ROESY spectrum of samholide D (4)
- Figure S48 The ESI MS spectrum of samholide E (5)

- Figure S49 The ESI MS<sup>2</sup> spectrum of samholide E (5)
- Figure S50 The positive HRESIMS spectrum of samholide E (5)
- Figure S51 <sup>1</sup>H NMR (600 MHz, DMSO) spectrum of samholide E (5)
- Figure S52 <sup>13</sup>C NMR (150 MHz, DMSO) spectrum of samholide E (5)
- Figure S53 DEPT spectrum of samholide E (5)
- Figure S54 <sup>1</sup>H-<sup>1</sup>H COSY spectrum of samholide E (5)
- Figure S55 HMBC spectrum of samholide E (5)
- Figure S56 HMQC spectrum of samholide E (5)
- Figure S57 ROESY spectrum of samholide E (5)
- Figure S58 The ESI MS spectrum of samholide F (6)
- Figure S59 The ESI MS<sup>2</sup> spectrum of samholide F (6)
- Figure S60 The positive HRESIMS spectrum of samholide F (6)
- Figure S61 <sup>1</sup>H NMR (600 MHz, DMSO) spectrum of samholide F (6)
- Figure S62 <sup>13</sup>C NMR (150 MHz, DMSO) spectrum of samholide F (6)
- Figure S63 <sup>1</sup>H-<sup>1</sup>H COSY spectrum of samholide F (6)
- Figure S64 Amplified <sup>1</sup>H-<sup>1</sup>H COSY spectrum of samholide F (6)
- Figure S65 HMBC spectrum of samholide F (6)
- Figure S66 Amplified HMBC spectrum of samholide F (6)
- Figure S67 HMQC spectrum of samholide F (6)
- Figure S68 HSQC-TOCSY spectrum of samholide F (6)
- Figure S69 ROESY spectrum of samholide F (6)
- Figure S70 Amplified ROESY spectrum of samholide F (6)
- Figure S71 The ESI MS spectrum of samholide G (7)
- Figure S72 The ESI MS<sup>2</sup> spectrum of samholide G (7)
- Figure S73 The positive HRESIMS spectrum of samholide G (7)
- Figure S74 <sup>1</sup>H NMR (600 MHz, DMSO) spectrum of samholide G (7)
- Figure S75 <sup>13</sup>C NMR (150 MHz, DMSO) spectrum of samholide G (7)
- Figure S76 <sup>1</sup>H-<sup>1</sup>H COSY spectrum of samholide G (7)
- Figure S77 HMBC spectrum of samholide G (7)
- Figure S78 HMQC spectrum of samholide G (7)
- Figure S79 HSQC-TOCSY spectrum of samholide G (7)
- Figure S80 ROESY spectrum of samholide G (7)
- Figure S81 The ESI MS spectrum of samholide H (8)
- Figure S82 The ESI MS<sup>2</sup> spectrum of samholide H (8)
- Figure S83 The positive HRESIMS spectrum of samholide H (8)
- Figure S84 <sup>1</sup>H NMR (600 MHz, DMSO) spectrum of samholide H (8)
- Figure S85 <sup>13</sup>C NMR (150 MHz, DMSO) spectrum of samholide H (8)
- Figure S86 <sup>1</sup>H-<sup>1</sup>H COSY spectrum of samholide H (8)
- Figure S87 Amplified <sup>1</sup>H-<sup>1</sup>H COSY spectrum of samholide H (8)
- Figure S88 HMBC spectrum of samholide H (8)
- Figure S89 Amplified HMBC spectrum of samholide H (8)
- Figure S90 HMQC spectrum of samholide H (8)
- Figure S91 HSQC-TOCSY spectrum of samholide H (8)
- Figure S92 Amplified HSQC-TOCSY spectrum of samholide H (8)

- Figure S93 ROESY spectrum of samholide H (8)
- Figure S94 The ESI MS spectrum of samholide I (9)
- Figure S95 The ESI MS<sup>2</sup> spectrum of samholide I (9)
- Figure S96 The positive HRESIMS spectrum of samholide I (9)
- Figure S97 <sup>1</sup>H NMR (600 MHz, DMSO) spectrum of samholide I (9)
- Figure S98 <sup>13</sup>C NMR (150 MHz, DMSO) spectrum of samholide I (9)
- Figure S99 <sup>1</sup>H-<sup>1</sup>H COSY spectrum of samholide I (9)
- Figure S100 HMBC spectrum of samholide I (9)
- Figure S101 HMQC spectrum of samholide I (9)
- Figure S102 HSQC-TOCSY spectrum of samholide I (9)
- Figure S103 ROESY spectrum of samholide I (9)
- Figure S104 MS<sup>2</sup>-based molecular networking of fractions D-I of cf. *Phormidium* sp.

Table S1 <sup>13</sup>C NMR data comparison of samholide A (**1**), swinholide A and ankaraholide A<sup>a</sup>

| No. in <b>1</b> | Compound <b>1</b> (CDCl <sub>3</sub> )<br>20-demethyl | Swinholide A (CDCl <sub>3</sub> )<br>16,20-dimethyl | Δ     | Ankaraholide A ( (CDCl <sub>3</sub> )<br>16-demethyl | Δ     |
|-----------------|-------------------------------------------------------|-----------------------------------------------------|-------|------------------------------------------------------|-------|
| 1               | 170.64                                                | 170.1                                               | 0.54  | 170.1                                                | 0.54  |
| 2               | 113.54                                                | 113.3                                               | 0.24  | 115                                                  | -1.46 |
| 3               | 153.07                                                | 153.3                                               | -0.23 | 151.9                                                | 1.17  |
| 4               | 133.91                                                | 134.3                                               | -0.39 | 134.6                                                | -0.69 |
| 5               | 142.86                                                | 142.3                                               | 0.56  | 139.8                                                | 3.06  |
| 6               | 33.53                                                 | 33.9                                                | -0.37 | 33.6                                                 | -0.07 |
| 7               | 78.98                                                 | 76                                                  | 2.98  | 76.7                                                 | 2.28  |
| 8               | 39.86                                                 | 38.5                                                | 1.36  | 39.7                                                 | 0.16  |
| 9               | 68.7                                                  | 65.9                                                | 2.8   | 69.4                                                 | -0.7  |
| 10              | 123.27                                                | 123.3                                               | -0.03 | 123.6                                                | -0.33 |
| 11              | 129.67                                                | 129.9                                               | -0.23 | 129.6                                                | 0.07  |
| 12              | 31.47                                                 | 30                                                  | 1.47  | 31.9                                                 | -0.43 |
| 13              | 63.36                                                 | 64.6                                                | -1.24 | 64.4                                                 | -1.04 |
| 14              | 36.41                                                 | 37.4                                                | -0.99 | 37.2                                                 | -0.79 |
| 15              | 75.02                                                 | 74.4                                                | 0.62  | 74.8                                                 | 0.22  |
| 16              | 41.19                                                 | 40.9                                                | 0.29  | 40.7                                                 | 0.49  |
| 17              | 73.48                                                 | 73.9                                                | -0.42 | 74.7                                                 | -1.22 |
| 18              | 41.39                                                 | 41.1                                                | 0.29  | 41.7                                                 | -0.31 |
| 19              | 69.62                                                 | 66.7                                                | 2.92  | 69.9                                                 | -0.28 |
| 20              | 42.1                                                  | 41.1                                                | 1     | 43.6                                                 | -1.5  |
| 21              | 70.34                                                 | 71.4                                                | -1.06 | 71.4                                                 | -1.06 |
| 22              | 40.49                                                 | 38.7                                                | 1.79  | 40.1                                                 | 0.39  |
| 23              | 75.81                                                 | 75.1                                                | 0.71  | 76.6                                                 | -0.79 |
| 24              | 33.43                                                 | 33.3                                                | 0.13  | 33.5                                                 | -0.07 |
| 25              | 23.22                                                 | 24                                                  | -0.78 | 24                                                   | -0.78 |
| 26              | 29.29                                                 | 29.4                                                | -0.11 | 29.7                                                 | -0.41 |
| 27              | 71.53                                                 | 71.4                                                | 0.13  | 71.6                                                 | -0.07 |
| 28              | 35.05                                                 | 34.9                                                | 0.15  | 35.4                                                 | -0.35 |
| 29              | 73.45                                                 | 73.3                                                | 0.15  | 73.7                                                 | -0.25 |
| 30              | 38.88                                                 | 37.7                                                | 1.18  | 39                                                   | -0.12 |
| 31              | 64.7                                                  | 65.8                                                | -1.1  | 65                                                   | -0.3  |
| 32              | 102.11                                                | —                                                   | —     | 103                                                  | -0.89 |
| 33              | 73.16                                                 | —                                                   | —     | 73                                                   | 0.16  |
| 34              | 82.43                                                 | —                                                   | —     | 84                                                   | -1.57 |
| 35              | 79.26                                                 | —                                                   | —     | 79.6                                                 | -0.34 |
| 36              | 62.32                                                 | —                                                   | —     | 62.8                                                 | -0.48 |
| 37              | 170.7                                                 | —                                                   | —     | —                                                    | —     |
| 38              | 72.37                                                 | —                                                   | —     | —                                                    | —     |
| 39              | 64.66                                                 | —                                                   | —     | —                                                    | —     |
| 4-Me            | 12.06                                                 | 12.3                                                | -0.24 | 12.7                                                 | -0.64 |
| 16-Me           | 9.32                                                  | 9.1                                                 | 0.22  | N                                                    | —     |
| 20-Me           | N                                                     | 9.4                                                 | —     | 9.7                                                  | —     |
| 22-Me           | 9.69                                                  | 9.2                                                 | 0.49  | 9.8                                                  | -0.11 |
| 24-Me           | 17.22                                                 | 17.8                                                | -0.58 | 17.9                                                 | -0.68 |
| 31-Me           | 21.87                                                 | 21.8                                                | 0.07  | 22.3                                                 | -0.43 |

<sup>a</sup> Andrianasolo, E. H.; Gross, H.; Goeger, D.; Musafija-Girt, M.; McPhail, K.; Leal, R. M.; Mooberry, S. L.; Gerwick, W. H., Isolation of Swinholide A and Related Glycosylated Derivatives from Two Field Collections of Marine Cyanobacteria. *Organic Letters* 2005, 7 (7), 1375-1378.

Table S2 <sup>1</sup>H NMR data comparison of samholide A (**1**), swinholide A and ankaraholide A<sup>a</sup>

| No. in <b>1</b> | Compound <b>1</b> (CDCl <sub>3</sub> )<br>20-demethyl | Swinholide A (CDCl <sub>3</sub> )<br>16,20-dimethyl | Ankaraholide A (CDCl <sub>3</sub> )<br>16-demethyl |
|-----------------|-------------------------------------------------------|-----------------------------------------------------|----------------------------------------------------|
| 2               | 5.78 (overlapped)                                     | 5.79 d (15.8)                                       | 5.84 d (15.6)                                      |
| 3               | 7.6 (d, 15.5)                                         | 7.58 d (15.8)                                       | 7.51 d (15.6)                                      |
| 5               | 6.34 (dd, 9.44, 3.17)                                 | 6.08 dd (9.0, 5.1)                                  | 6.25 dd (6.4, 6.3)                                 |
| 6               | 2.50 (d, 12.76)                                       | 2.46 ddd (19.9, 9.7, 9.7)                           | 2.69 m                                             |
|                 | 2.37 (m)                                              | 2.17 br d (14.9)                                    | 2.45 m                                             |
| 7               | 4.10 (m)                                              | 4.16 dd (7.2, 7.2)                                  | 4.07 m                                             |
| 8               | 2.33 (m), 1.53 (m)                                    | 1.60 m                                              | 1.60 m, 1.35 m                                     |
| 9               | 4.21 (d, 11.81)                                       | 4.52 br d (9.2)                                     | 4.38 m                                             |
| 10              | 5.68 (d, 10.26)                                       | 5.69 d (10.2)                                       | 5.74 d (10.0)                                      |
| 11              | 5.77 (m)                                              | 5.78 m                                              | 5.83 m                                             |
| 12              | 2.08 (d, 17.58), 1.96 (m)                             | 2.28 br d (17.2), 1.89 m                            | 2.00 m, 1.98 m                                     |
| 13              | 3.69 (m)                                              | 3.90 m                                              | 3.7 m                                              |
| 14              | 1.86 (m), 1.64 (m)                                    | 1.45 m, 2.15 m                                      | 2.22 m, 1.63 m                                     |
| 15              | 4.07 (m)                                              | 4.01 m                                              | 3.75 m                                             |
| 16              | 1.59 (m)                                              | 1.68 m                                              | 1.65 m, 1.37 m                                     |
| 17              | 3.84 (t, 9.5)                                         | 3.84 dd (9.5, 9.5)                                  | 4.11 m                                             |
| 18              | 1.80 (m), 1.62 (m)                                    | 1.63 m, 1.58 m                                      | 1.76 m                                             |
| 19              | 3.95 (m)                                              | 4.01 m                                              | 3.90 m                                             |
| 20              | 1.94 (m), 1.52 (m)                                    | 1.75 dq (9.7, 7.2)                                  | 1.69 m                                             |
| 21              | 5.84 (d, 11.37)                                       | 5.35 d (10.8)                                       | 5.38 d (10.1)                                      |
| 22              | 1.65 (m)                                              | 1.93 m                                              | 1.92 m                                             |
| 23              | 3.18 (d, 9.01)                                        | 3.13 d (9.7)                                        | 3.12 d (8.5)                                       |
| 24              | 1.65 (m)                                              | 1.66 m                                              | 1.69 m                                             |
| 25              | 1.22 (m)                                              | 1.38 m, 1.26 m                                      | 1.39 m, 1.27 m                                     |
| 26              | 1.80 (m), 1.22 (m)                                    | 1.87 m, 1.25 m                                      | 1.90 m, 1.27 m                                     |
| 27              | 3.94 (m)                                              | 4.01 m                                              | 4.02 m                                             |
| 28              | 1.76 (m), 1.55 (m)                                    | 1.82 m, 1.59 m                                      | 1.84 m, 1.62 m                                     |
| 29              | 3.50 (m)                                              | 3.54 m                                              | 3.56 m                                             |
| 30              | 1.94 (m), 1.15 (m)                                    | 1.97 m, 1.17 m                                      | 2.01 m, 1.19 m                                     |
| 31              | 3.64 (m)                                              | 3.70 m                                              | 3.66 m                                             |
| 32              | 4.78 (d, 6.09)                                        | —                                                   | 4.58 d (5.5)                                       |
| 33              | 4.76 (dd, 8.21, 6.29)                                 | —                                                   | 3.30 m                                             |
| 34              | 3.25 (t, 7.50)                                        | —                                                   | 3.26 m                                             |
| 35              | 3.33 (m)                                              | —                                                   | 3.38 m                                             |
| 36              | 4.00 (dd, 14.79, 7.83), 3.30 (m)                      | —                                                   | 4.03 m, 3.29 m                                     |
| 38              | 4.06 (m)                                              | —                                                   | —                                                  |
| 39              | 3.70 (m), 3.50 (m)                                    | —                                                   | —                                                  |
| 4-Me            | 1.74 (s)                                              | 1.81 s                                              | 1.84 s                                             |
| 16-Me           | 0.83 (d, 6.85)                                        | 0.81 d (6.9)                                        | —                                                  |
| 20-Me           | —                                                     | 0.98 d (6.9)                                        | 0.88 d (7.0)                                       |
| 22-Me           | 0.90 (d, 6.85)                                        | 0.83 d (6.9)                                        | 0.94 d (6.7)                                       |
| 24-Me           | 0.95 (d, 6.67)                                        | 0.99 d (7.2)                                        | 1.01 d (6.3)                                       |
| 31-Me           | 1.16 (d, 6.19)                                        | 1.20 d (5.9)                                        | 1.22 d (6.3)                                       |

<sup>a</sup> Andrianasolo, E. H.; Gross, H.; Goeger, D.; Musafija-Girt, M.; McPhail, K.; Leal, R. M.; Mooberry, S. L.; Gerwick, W. H., Isolation of Swinholide A and Related Glycosylated Derivatives from Two Field Collections of Marine Cyanobacteria. *Organic Letters* 2005, 7 (7), 1375-1378.

Table S3 NMR data for samholide B (2)

|           | $\delta_C$         | $\delta_{C'}$      | $\delta_H$            | $\delta_{H'}$     | COSY                 | HMBC(H→C)                                  | HSQC-TOCSY                                           | ROESY                   |
|-----------|--------------------|--------------------|-----------------------|-------------------|----------------------|--------------------------------------------|------------------------------------------------------|-------------------------|
| 1,1'      | 167.9              | 170.1              |                       |                   |                      |                                            |                                                      |                         |
| 2,2'      | 116.3              | 114.3              | 5.67 m                | 5.79 m            | 3/3'                 | 1, 1', 4, 4', 21, 21'                      | 3/3', 2/2'                                           | 4'-Me                   |
| 3,3'      | 148.6              | 152.2              | 6.51 d (12.6)         | 7.50 d (15.6)     | 2/2'                 | 1, 1', 2', 4', 4-Me, 4'-Me, 5, 5'          | 2/2', 3/3',                                          | 5/5'                    |
| 4,4'      | 134.1              |                    |                       |                   |                      |                                            |                                                      |                         |
| 4,4'-Me   | 15.7               | 12.4               | 1.86 s                | 1.77 s            | 5/5'                 | 3/3', 4/4', 5/5'                           | 4/4'-Me, 5/5'                                        | 2/2', 8/8'              |
| 5,5'      | 135.0              | 140.6              | 5.84 dd (7.06, 6.27)  | 6.14 dd (6.47)    | 6/6', 4/4'-Me        | 3/3', 4/4'-Me, 6/6', 7/7'                  | 4/4'-Me, 6/6', 8/8', 9/9', 7/7', 5/5'                | 3/7, 3'/7'              |
| 6,6'      | 33.0               | 33.1               | 2.55 dd (14.73, 5.62) | 2.62 br d (13.34) | 5/5', 7/7'           | 4/4', 5/5', 7/7', 8/8'                     | 4/4'-Me, 6/6', 8/8', 9/9', 7/7', 5/5'                | 9/9',                   |
|           |                    |                    | 2.38 m                | 2.28 m            |                      |                                            |                                                      |                         |
| 7,7'      | 77.4 <sup>b</sup>  | 77.7 <sup>b</sup>  | 4.06 m                | 4.10 m            | 6/6', 8/8'           | 32/32'                                     | 6/6', 8/8', 9/9', 7/7', 5/5'                         | 32'                     |
| 8,8'      | 39.5               | 39.6               | 2.15 m, 1.52 m        | 2.28 m, 1.54 m    | 7/7', 9/9'           | 6/6', 7/7', 8/8', 9/9'                     | 5/5', 7/7', 9/9', 8/8', 6/6'                         |                         |
| 9,9'      | 69.5               |                    | 4.30 m                |                   | 8/8', 10/10'         | 8/8', 10/10', 11/11', 13/13'               | 6/6', 12/12', 8/8', 9/9', 7/7', 10/10', 11/11', 5/5' | 6a/6a'                  |
| 10,10'    | 129.7 <sup>a</sup> | 129.6 <sup>a</sup> | 5.70 m                |                   | 9/9', 11/11', 12/12' | 9/9', 12/12'                               | 12/12', 14/14', 8/8', 13/13', 9/9', 10/10', 11/11'   |                         |
| 11,11'    | 123.8 <sup>a</sup> | 123.7 <sup>a</sup> | 5.80 m                |                   | 10/10', 12/12'       | 9/9', 12/12', 13/13'                       | 12/12', 14/14', 8/8', 13/13', 9/9', 10/10', 11/11'   |                         |
| 12,12'    | 31.5 <sup>a</sup>  | 31.4 <sup>a</sup>  | 2.01 m                |                   | 11/11', 13/13'       | 10/10', 11/11', 13/13', 14/14'             | 12/12', 14/14', 13/13', 7/7', 10/10', 11/11'         |                         |
| 13,13'    | 64.1               | 63.8               | 3.67 m                |                   | 12/12', 14/14'a      |                                            | 12/12', 14/14', 15/15', 13/13'                       |                         |
| 14,14'    | 36.2               | 35.9               | 1.87 m, 1.62 m        |                   | 13/13', 15/15'       |                                            | 12/12', 14/14', 13/13', 15/15'                       |                         |
| 15,15'    | 77.2 <sup>b</sup>  |                    | 4.06 m                |                   | 14/14'               |                                            | 12/12', 14/14', 13/13', 15/15',                      |                         |
| 16,16'    | 41.5               |                    | 1.54 m                |                   | 16/16'-Me, 15/15'    |                                            | 13/13', 15/15', 16/16', 14/14', 16,16'-Me            |                         |
| 16,16'-Me | 9.9 <sup>a</sup>   | 9.6 <sup>a</sup>   | 0.81 d (6.0)          | 0.82 d (6.0)      | 16/16'               | 15/15', 16/16', 17/17'                     | 16,16'-Me, 16/16', 19/19', 17/17', 18/18'            |                         |
| 17,17'    | 73.9               | 73.6               | 3.85 m                |                   | 18/18'               |                                            | 16/16'-Me, 18/18', 17/17', 19/19'                    |                         |
| 18,18'    | 40.9               | 41.2               | 1.76 m, 1.63 m        |                   |                      |                                            | 17/17', 18/18', 19/19', 20/20'                       |                         |
| 19,19'    | 69.3               | 68.8               | 3.93 m                | 3.88, m           |                      |                                            | 20/20', 21/21', 19/19', 18/18'                       |                         |
| 20,20'    | 41.1               | 41.5               | 1.94 m, 1.53 m        |                   | 20/20'               |                                            | 20/20', 21/21', 19/19'                               |                         |
| 21,21'    | 71.1               | 71.4               | 5.63 d (9.82)         | 5.71 m            |                      | 1', 1,19, 19', 20', 22-Me, 22'-Me, 23, 23' | 20/20', 19/19'                                       |                         |
| 22,22'    | 41.1               | 40.9               | 1.64 m                |                   | 22/22'               |                                            | 22,22'-Me, 25/25', 26/26', 24/24', 22/22', 23/23'    |                         |
| 22,22'-Me | 10.0               | 10.2               | 0.87 d (6.81)         | 0.89 d (6.86)     | 22/22', 24/24'       | 21/21', 22/22', 23/23'                     | 22,22'-Me, 22/22', 23/23'                            |                         |
| 23,23'    | 76.6               | 76.1               | 3.17 d (9.69)         | 3.12 d (9.59)     |                      | 21/21', 22/22', 24/24'-Me, 25/25'          | 22/22'-Me, 22/22', 23/23'                            | 22/22'-Me,<br>24/24'-Me |
| 24,24'    | 33.5               |                    | 1.67 m                |                   | 24/24'               |                                            | 24/24'-Me, 25/25', 26/26', 24/24', 22/22', 23/23'    |                         |
| 24,24'-Me | 17.6 <sup>a</sup>  | 17.5 <sup>a</sup>  | 0.97 d (7.15)         | 0.95 d (7.07)     |                      | 23/23', 24/24', 25/25'                     | 24,24'-Me, 26/26', 24/24', 27/27', 25/25'            |                         |
| 25,25'    | 24.0 <sup>a</sup>  | 23.8 <sup>a</sup>  | 1.25 m                |                   |                      |                                            | 24,24'-Me, 26/26', 25/25', 24/24', 27/27'            |                         |

|            |                   |                   |               |                      |        |                        |                                                   |
|------------|-------------------|-------------------|---------------|----------------------|--------|------------------------|---------------------------------------------------|
| 26,26'     | 29.4              | 29.3              |               | 1.88 m, 1.25 m       |        |                        | 24/24'-Me, 25/25', 26/26', 27/27'                 |
| 27,27'     | 71.6              | 71.5              |               | 3.99 m               |        |                        | 24/24'-Me, 25/25', 26/26', 28/28', 30/30', 29/29' |
| 28,28'     |                   | 35.1              |               | 1.82 m, 1.59 m       |        |                        | 31/31', 30/30', 28/28', 29/29', 27/27'            |
| 29,29'     |                   | 73.4              |               | 3.53 m               |        |                        | 28/28', 29/29', 30/30', 31/31', 31/31'-Me,        |
| 30,30'     |                   | 38.9              |               | 1.99 m, 1.18 m       |        |                        | 31/31'-Me, 28/28', 30/30', 31/31', 29/29'         |
| 31,31'     |                   | 64.8              |               | 3.67 m               |        |                        | 31/31'-Me, 28/28', 30/30', 31/31', 29/29'         |
| 31,31'-Me  | 22.0 <sup>a</sup> | 21.9 <sup>a</sup> | 1.18 d (6.36) | 1.17 d (6.14)        | 31/31' | 30/30', 31/31'         | 31,31'-Me, 30/30', 31/31', 28/28', 29/29'         |
| 32,32'     | 100.7             | 101.2             | 4.67 d (6.91) | 4.74 d (6.80)        |        | 7/7', 33/33', 36/36'   | 32/32', 33/33', 34/34', 35/35', 36/36'            |
| 33,33'     |                   | 73.4              |               | 4.82 dd (8.33, 7.02) | 34/34' | 32/32', 34/34', 37/37' | 32/32', 33/33', 34/34', 35/35', 36/36'            |
| 34,34'     | 82.1              | 82.4              |               | 3.34 m               | 33/33' |                        | 32/32', 33/33', 34/34', 35/35', 36/36'            |
| 35,35'     | 79.0              | 79.3              |               | 3.34 m               |        |                        | 32/32', 33/33', 34/34', 35/35', 36/36'            |
| 36,36'     |                   | 62.7              |               | 4.05 m, 3.28 m       | 35/35' | 32/32', 34/34', 35/35' | 32/32', 33/33', 34/34', 35/35', 36/36'            |
| 37,37'     | 171.4             | 170.9             |               |                      |        |                        |                                                   |
| 38,38'     | 72.5              | 72.4              | 4.28 m        | 4.20 brs             | 39/39' | 37/37', 39/39'         | 38/38', 39/39'                                    |
| 39,39'     | 64.4              | 64.5              |               | 3.88 m, 3.66 m       | 38/38' | 38/38'                 | 38/38', 39/39'                                    |
| 15,15'-OMe | 57.1 <sup>a</sup> | 57.2 <sup>a</sup> |               | 3.34 s               |        | 15,15'-OMe             |                                                   |
| 29,29'-OMe |                   | 55.4              |               | 3.32 s               |        | 29,29'-OMe             |                                                   |
| 34,34'-OMe | 60.2 <sup>a</sup> | 60.1 <sup>a</sup> |               | 3.48 s               |        | 34,34'-OMe             |                                                   |
| 35,35'-OMe | 58.6 <sup>a</sup> | 58.7 <sup>a</sup> |               | 3.44 s               |        | 35,35'-OMe             |                                                   |

<sup>a</sup> Can be exchanged.

<sup>b</sup> Overlapped with CDCl<sub>3</sub>, assigned using HMBC, HSQC and HSQC-TOCSY.



Table S4 NMR data for samholide C (3)

|           | $\delta_C/\delta_C'$ | $\delta_H/\delta_H'$                                  | COSY                        | HMBC                                             | HSQC-TOCSY                                           | ROESY                        |
|-----------|----------------------|-------------------------------------------------------|-----------------------------|--------------------------------------------------|------------------------------------------------------|------------------------------|
| 1,1'      | 170.3                |                                                       |                             |                                                  |                                                      |                              |
| 2,2'      | 114.2                | 5.79 d (15.59)                                        | 3/3'                        | 3/3', 1/1'                                       | 3/3', 2/2'                                           | 4/4'-Me                      |
| 3,3'      | 152.4                | 7.53 d (15.56)                                        | 2/2'                        | 1/1', 2/2', 4/4', 4/4'-Me, 5/5'                  | 2/2', 3/3'                                           | 5/5'                         |
| 4,4'      | 134.6                |                                                       |                             |                                                  |                                                      |                              |
| 4,4'-Me   | 12.4                 | 1.82 s                                                | 5/5'                        | 3/3', 4/4', 5/5'                                 | 4/4'-Me, 5/5'                                        | 2/2', 6/6'                   |
| 5,5'      | 140.8                | 6.31 dd (7.55, 7.37)                                  | 6/6', 4/4'-Me               | 4/4'-Me, 3/3', 6/6', 7/7'                        | 4/4'-Me, 6/6', 8/8', 9/9', 7/7', 5/5'                | 7/7', 3/3'                   |
| 6,6'      | 33.2                 | 2.59 ddd (2.85, 6.14, 14.47)<br>2.37 dt (8.86, 14.34) | 5/5', 7/7'                  | 4/4', 5/5', 7/7', 8/8'                           | 4/4'-Me, 6/6', 8/8', 9/9', 7/7', 5/5'                | 4/4'-Me, 9/9'                |
| 7,7'      | 76.6 <sup>a</sup>    | 4.04 m                                                | 6/6', 8/8'                  | 5/5', 6/6', 8/8', 9/9', 32/32'                   | 6/6', 8/8', 9/9', 7/7', 5/5'                         | 5/5', 32/32'                 |
| 8,8'      | 39.8                 | 2.25 ddd (5.02, 9.81, 15.0)<br>1.63 m                 | 7/7', 9/9'                  | 6/6', 7/7', 9/9', 10/10'                         | 5/5', 7/7', 9/9', 8/8', 6/6'                         | 4/4'-Me, 13/13'              |
| 9,9'      | 69.6                 | 4.30 m                                                | 8/8', 10/10'                | 7/7', 8/8', 10/10', 11/11', 13/13',              | 6/6', 12/12', 8/8', 9/9', 7/7', 10/10', 11/11', 5/5' | 6a/6a', 14/14'               |
| 10,10'    | 129.8                | 5.74 m                                                | 9/9', 11/11', 12/12'        | 9/9', 12/12'                                     | 12/12', 14/14', 8/8', 13/13', 9/9', 10/10', 11/11'   |                              |
| 11,11'    | 123.5                | 5.74 m                                                | 10/10', 12/12'              | 9/9', 12/12', 13/13'                             | 12/12', 14/14', 8/8', 13/13', 9/9', 10/10', 11/11'   |                              |
| 12,12'    | 31.6                 | 1.97 m                                                | 11/11', 13/13'              | 10/10', 11/11', 13/13', 14/14'                   | 12/12', 14/14', 13/13', 7/7', 10/10', 11/11'         |                              |
| 13,13'    | 63.6                 | 3.63 m                                                | 12/12', 14/14' <sup>a</sup> |                                                  | 12/12', 14/14', 15/15', 13/13'                       | 5/5', 7/7', 8a/8a'           |
| 14,14'    | 36.9                 | 1.78 m, 1.64 m                                        | 13/13', 15/15'              | 9/9', 14/14', 15/15'                             | 12/12', 14/14', 13/13', 15/15'                       |                              |
| 15,15'    | 76                   | 4.01 m                                                | 14/14'                      | 14/14', 15/15'-OMe, 16/16'-Me, 16/16',<br>17/17' | 12/12', 14/14', 13/13', 15/15',                      | 13/13'                       |
| 16,16'    | 41.5                 | 1.51 m                                                | 16/16'-Me, 15/15'           | 16/16'-Me, 15/15'                                | 13/13', 15/15', 16/16', 14/14', 16,16'-Me            |                              |
| 16,16'-Me | 9.3                  | 0.78 d (6.98)                                         | 16/16'                      | 15/15', 16/16', 17/17'                           | 16,16'-Me, 16/16', 19/19', 17/17', 18/18'            |                              |
| 17,17'    | 74                   | 3.84 t (9.70)                                         | 18/18'                      | 15/15', 16/16'-Me, 16/16', 18/18', 19/19'        | 16/16'-Me, 18/18', 17/17', 19/19'                    | 16/16'-Me                    |
| 18,18'    | 40.8                 | 1.70 m, 1.41 m                                        |                             | 17/17', 19/19'                                   | 17/17', 18/18', 19/19', 20/20'                       |                              |
| 19,19'    | 69.9                 | 3.88 t (10.55)                                        |                             | 17/17', 18/18', 21/21'                           | 20/20', 21/21', 19/19', 18/18'                       |                              |
| 20,20'    | 42.2                 | 1.87 m                                                | 20/20'                      | 21/21',                                          | 20/20', 21/21', 19/19'                               |                              |
| 21,21'    | 70.6                 | 5.56 d (11.09)                                        |                             | 1/1', 19/19', 23/23', 20/20', 22/22', 22/22'-Me  | 20/20', 19/19'                                       | 22-Me, 19/19'                |
| 22,22'    | 40.8                 | 1.65 m                                                | 22/22'                      |                                                  | 22,22'-Me, 25/25', 26/26', 24/24', 22/22', 23/23'    |                              |
| 22,22'-Me | 10.1                 | 0.90 d (6.89)                                         | 22/22', 24/24'              | 21/21', 22/22', 23/23'                           | 22,22'-Me, 22/22', 23/23'                            |                              |
| 23,23'    | 76.3                 | 3.19 m                                                |                             | 21/21', 22/22', 24/24', 24/24'-Me, 25/25'        | 22/22'-Me, 22/22', 23/23'                            | 22/22'-Me, 24/24'-Me, 21/21' |
| 24,24'    | 33.2                 | 1.68 m                                                | 24/24'                      | 23/23', 24/24'-Me                                | 24/24'-Me, 25/25', 26/26', 24/24', 22/22', 23/23'    |                              |

|            |       |                                    |        |                                    |                                                   |                          |
|------------|-------|------------------------------------|--------|------------------------------------|---------------------------------------------------|--------------------------|
| 24,24'-Me  | 17.4  | 0.93 d (6.73)                      |        | 23/23', 24/24', 25/25'             | 24,24'-Me, 26/26', 24/24', 27/27', 25/25'         |                          |
| 25,25'     | 23.9  | 1.34 m, 1.17 m                     |        | 24/24', 24/24'-Me, 26/26'          | 24,24'-Me, 26/26', 25/25', 24/24', 27/27'         |                          |
| 26,26'     | 29.4  | 1.83 m, 1.26 m                     |        | 25/25', 27/27'                     | 24/24'-Me, 25/25', 26/26', 27/27'                 |                          |
| 27,27'     | 71    | 3.98 m                             |        |                                    | 24/24'-Me, 25/25', 26/26', 28/28', 30/30', 29/29' |                          |
| 28,28'     | 35    | 1.79 m, 1.59 m                     |        | 29/29'                             | 31/31', 30/30', 28/28', 29/29', 27/27'            |                          |
| 29,29'     | 73.4  | 3.52 ddd (4.4, 9.83, 14.17)        |        | 27/27', 28/28', 31/31', 29/29'-OMe | 28/28', 29/29', 30/30', 31/31', 31/31'-Me,        |                          |
| 30,30'     | 38.7  | 1.95 m, 1.18 m                     |        |                                    | 31/31'-Me, 28/28', 30/30', 31/31', 29/29'         |                          |
| 31,31'     | 64.9  | 3.69 dddd (2.88, 6.13, 12.0, 15.0) |        | 27/27', 29/29', 31/31'-Me          | 31/31'-Me, 28/28', 30/30', 31/31', 29/29'         |                          |
| 31,31'-Me  | 22    | 1.20 d (6.18)                      | 31/31' | 30/30', 31/31'                     | 31,31'-Me, 30/30', 31/31', 28/28', 29/29'         |                          |
| 32,32'     | 103.3 | 4.43 d (6.64)                      |        | 7/7', 34/34', 36/36'               | 32/32', 33/33', 34/34', 35/35', 36/36'            | 6/6', 7/7', 34/34', 5/5' |
| 33,33'     | 73.4  | 3.28 t (7.15)                      | 34/34' | 32/32', 34/34'                     | 32/32', 33/33', 34/34', 35/35', 36/36'            |                          |
| 34,34'     | 83.5  | 3.24 m                             | 33/33' | 34/34'-OMe                         | 32/32', 33/33', 34/34', 35/35', 36/36'            |                          |
| 35,35'     | 79.4  | 3.24 m                             |        | 34/34'                             | 32/32', 33/33', 34/34', 35/35', 36/36'            |                          |
| 36,36'     | 62.5  | 3.98 m, 3.16 m                     | 35/35' | 32/32', 34/34', 35/35'             | 32/32', 33/33', 34/34', 35/35', 36/36'            |                          |
| 15,15'-OMe | 57.5  | 3.35 s                             |        | 15/15'                             |                                                   |                          |
| 29,29'-OMe | 55.4  | 3.32 s                             |        | 29/29'                             |                                                   |                          |
| 34,34'-OMe | 60.2  | 3.56 s                             |        | 34/34'                             |                                                   |                          |
| 35,35'-OMe | 58.6  | 3.45 s                             |        | 35/35'                             |                                                   |                          |

<sup>a</sup> Overlapped with CDCl<sub>3</sub>, assigned using HMBC, HSQC and HSQC-TOCSY.

Table S5 NMR data for samholide D (4)

|           | $\delta_C$         | $\delta_{C'}$      | $\delta_H$     | $\delta_{H'}$  | COSY                        | HMBC                           | HSQC-TOCSY                                           | ROESY                        |
|-----------|--------------------|--------------------|----------------|----------------|-----------------------------|--------------------------------|------------------------------------------------------|------------------------------|
| 1,1'      | 167.4              | 170.9              |                |                |                             |                                |                                                      |                              |
| 2,2'      | 116.7              | 115.8              | 5.69 m         | 5.82 m         | 3/3'                        | 4/4', 1/1'                     | 3/3', 2/2'                                           | 3, 4'-Me                     |
| 3,3'      | 148.5              | 150.5              | 6.46 d (12.41) | 7.39 d (15.56) | 2/2'                        | 1, 2, 4, 4'-Me, 5              | 1', 4', 4'-Me                                        | 2/2', 3/3',                  |
| 4,4'      |                    | 133.6              |                |                |                             |                                |                                                      | 5/5'                         |
| 4,4'-Me   | 16.2               | 12.7               | 1.84 s         | 1.82 s         | 5/5'                        | 3/3', 4/4', 5/5'               | 4/4'-Me, 5/5'                                        | 6, 6', 2'                    |
| 5,5'      | 134.8              | 137.9              | 5.98 t (6.33)  | 6.09 t (6.23)  | 6/6', 4/4'-Me               | 4/4'-Me, 3/3', 6/6'            | 4/4'-Me, 6/6', 8/8', 9/9', 7/7', 5/5'                | 7/7', 3/3'                   |
| 6,6'      | 33.3               | 33.4               | 2.56 m         | 2.64 m         | 5/5', 7/7'                  | 4/4', 5/5', 7/7', 8/8'         | 4/4'-Me, 6/6', 8/8', 9/9', 7/7', 5/5'                | 9/9',                        |
|           |                    |                    | 2.34 m         | 2.36 m         |                             |                                |                                                      |                              |
| 7,7'      | 76.7 <sup>b</sup>  | 75.7 <sup>b</sup>  | 4.01 m         | 4.00 m         | 6/6', 8/8'                  |                                | 6/6', 8/8', 9/9', 7/7', 5/5'                         |                              |
| 8,8'      |                    | 39.1               | 2.10 m, 1.64 m |                | 7/7', 9/9'                  | 6/6', 7/7', 9/9'               | 5/5', 7/7', 9/9', 8/8', 6/6'                         | 13/13'                       |
| 9,9'      | 69.2               | 68.6               | 4.36 m         |                | 8/8', 10/10'                |                                | 6/6', 12/12', 8/8', 9/9', 7/7', 10/10', 11/11', 5/5' | 6a/6a'                       |
| 10,10'    | 129.6 <sup>a</sup> | 129.5 <sup>a</sup> | 5.74 m         |                | 9/9', 11/11', 12/12'        | 9/9', 12/12'                   | 12/12', 14/14', 8/8', 13/13', 9/9', 10/10', 11/11'   |                              |
| 11,11'    | 124.0              | 123.2              | 5.80 m         |                | 10/10', 12/12'              | 9/9', 12/12'                   | 12/12', 14/14', 8/8', 13/13', 9/9', 10/10', 11/11'   |                              |
| 12,12'    | 31.4               | 31.3               | 1.96 m         |                | 11/11', 13/13'              | 10/10', 11/11', 13/13', 14/14' | 12/12', 14/14', 13/13', 7/7', 10/10', 11/11'         |                              |
| 13,13'    | 64.4               | 64.3               | 3.64 m         |                | 12/12', 14/14' <sup>a</sup> |                                | 12/12', 14/14', 15/15', 13/13'                       |                              |
| 14,14'    | 36.1               | 35.7               | 1.87 m, 1.55 m |                | 13/13', 15/15'              |                                | 12/12', 14/14', 13/13', 15/15'                       |                              |
| 15,15'    |                    | 78.0 <sup>b</sup>  | 3.78 m         |                | 14/14'                      | 15/15'-OMe                     | 12/12', 14/14', 13/13', 15/15',                      | 16/16'-Me, 15/15'-OMe        |
| 16,16'    | 41.0               | 41.2               | 1.55 m         |                | 16/16'-Me, 15/15'           |                                | 13/13', 15/15', 16/16', 14/14', 16,16'-Me            |                              |
| 16,16'-Me | 10.0               | 10.2               | 0.83 d (6.54)  | 0.84 d (6.32)  | 16/16'                      | 15/15', 16/16', 17/17'         | 16,16'-Me, 16/16', 19/19', 17/17', 18/18'            |                              |
| 17,17'    | 73.8               | 74.2               | 3.80 m         |                | 18/18'                      |                                | 16/16'-Me, 18/18', 17/17', 19/19'                    | 16/16'-Me                    |
| 18,18'    |                    | 41.7               | 1.79 m, 1.41 m |                |                             |                                | 17/17', 18/18', 19/19', 20/20'                       |                              |
| 19,19'    |                    | 69.5               | 3.85 m         | 3.79 m         |                             |                                | 20/20', 21/21', 19/19', 18/18'                       |                              |
| 20,20'    | 41.9               | 42.1               | 1.87 m, 1.53 m |                | 20/20'                      |                                | 20/20', 21/21', 19/19'                               |                              |
| 21,21'    | 71.1               | 70.7               | 5.64 m         | 5.66 m         |                             | 1'/1', 22/22'-Me, 19/19'       | 20/20', 19/19'                                       | 19/19', 23/23'               |
| 22,22'    |                    | 40.5               | 1.64 m         |                | 22/22'                      |                                | 22,22'-Me, 25/25', 26/26', 24/24', 22/22', 23/23'    |                              |
| 22,22'-Me | 10.3               | 10.5               | 0.87 d (8.45)  | 0.89 d (7.47)  | 22/22', 24/24'              | 21/21', 22/22', 23/23'         | 22,22'-Me, 22/22', 23/23'                            |                              |
| 23,23'    |                    | 76.5               | 3.09 m         |                |                             | 21/21', 24/24'-Me, 25/25'      | 22/22'-Me, 22/22', 23/23'                            | 22/22'-Me, 24/24'-Me, 21/21' |
| 24,24'    | 33.0               | 32.8               | 1.69 m         |                | 24/24'                      |                                | 24/24'-Me, 25/25', 26/26', 24/24', 22/22', 23/23'    |                              |
| 24,24'-Me | 17.7               | 17.6               | 0.97 d (6.10)  |                |                             | 23/23', 24/24', 25/25'         | 24,24'-Me, 26/26', 24/24', 27/27', 25/25'            |                              |
| 25,25'    | 24.2               | 23.9               | 1.37 m, 1.25 m |                |                             |                                | 24,24'-Me, 26/26', 25/25', 24/24', 27/27'            |                              |
| 26,26'    | 29.8               | 29.3               | 1.86 m, 1.25 m |                |                             |                                | 24/24'-Me, 25/25', 26/26', 27/27'                    |                              |

|            |       |       |  |                |        |        |                      |                                                   |
|------------|-------|-------|--|----------------|--------|--------|----------------------|---------------------------------------------------|
| 27,27'     | 71.7  |       |  | 3.98 m         |        |        |                      | 24/24'-Me, 25/25', 26/26', 28/28', 30/30', 29/29' |
| 28,28'     | 35    |       |  | 1.82 m, 1.56 m |        |        |                      | 31/31', 30/30', 28/28', 29/29', 27/27'            |
| 29,29'     | 73.4  |       |  | 3.52 m         |        |        | OMe, 31/31'          | 28/28', 29/29', 30/30', 31/31', 31/31'-Me,        |
| 30,30'     | 38.9  |       |  | 1.97 m, 1.16 m |        |        |                      | 31/31'-Me, 28/28', 30/30', 31/31', 29/29'         |
| 31,31'     | 64.7  |       |  | 3.68 m         |        |        | 31/31'-Me            | 31/31'-Me, 28/28', 30/30', 31/31', 29/29'         |
| 31,31'-Me  | 22    |       |  | 1.20 d (5.9)   | 31/31' |        | 30/30', 31/31'       | 31,31'-Me, 30/30', 31/31', 28/28', 29/29'         |
| 32,32'     | 101.9 | 102.6 |  | 4.46 d (6.6)   | 4.39 m |        | 7/7', 36/36'         | 32/32', 33/33', 34/34', 35/35', 36/36'            |
| 33,33'     | 73.4  |       |  | 3.29 m         |        | 34/34' | 32/32', 34/34'       | 32/32', 33/33', 34/34', 35/35', 36/36'            |
| 34,34'     | 83.4  | 83.5  |  | 3.20 m         |        | 33/33' | 33/33', 35/35', OMe, | 32/32', 33/33', 34/34', 35/35', 36/36'            |
| 35,35'     | 79.0  | 79.3  |  | 3.25 m         |        |        | 34/34', 36/36', OMe  | 32/32', 33/33', 34/34', 35/35', 36/36'            |
| 36,36'     | 62.6  |       |  | 3.99 m, 3.21 m |        | 35/35' | 32/32'               | 32/32', 33/33', 34/34', 35/35', 36/36'            |
| 15,15'-OMe | 57.1  |       |  | 3.35 s         |        |        |                      | 15,15'-OMe                                        |
| 29,29'-OMe | 55.4  |       |  | 3.34 s         |        |        |                      | 29,29'-OMe                                        |
| 34,34'-OMe | 60.3  | 60.2  |  | 3.59 s         |        |        |                      | 34,34'-OMe                                        |
| 35,35'-OMe | 58.5  |       |  | 3.45 s         | 3.44 s |        |                      | 35,35'-OMe                                        |

<sup>a</sup> Can be exchanged.

<sup>b</sup> Overlapped with CDCl<sub>3</sub>, assigned using HMBC, HSQC and HSQC-TOCSY.

Table S6 NMR data for samholide E (5)

|           | $\delta_C$ | $\delta_{C'}$ | $\delta_H$     | $\delta_{H'}$          | COSY                 | HMBC                                  | ROESY                        |
|-----------|------------|---------------|----------------|------------------------|----------------------|---------------------------------------|------------------------------|
| 1,1'      | 170.5      | 169.9         |                |                        |                      |                                       |                              |
| 2,2'      | 113.5      | 114.4         |                | 5.79 d (15.48)         | 3/3'                 | 1/1', 4/5'                            | 4/4'-Me, 22/22'-Me           |
| 3,3'      | 153.1      | 152.1         | 7.57 d (15.55) | 7.52 d (15.56)         | 2/2'                 | 1/1', 2/2', 4/4', 4/4'-Me, 5/5'       | 5/5', 38                     |
| 4,4'      | 133.7      | 134.5         |                |                        |                      |                                       |                              |
| 4,4'-Me   | 12.1       | 12.4          | 1.75 s         | 1.82 s                 | 5/5'                 | 3/3', 4/4', 5/5'                      | 2/2', 6/6'                   |
| 5,5'      | 142.7      | 140.3         | 6.32 m         | 6.33 m                 | 6/6', 4/4'-Me        | 4/4'-Me, 3/3', 6/6', 7/7'             | 7/7', 3/3'                   |
| 6,6'      | 33.6       | 33.2          | 2.50 d (13.39) | 2.67 d (12.99)         | 5/5', 7/7'(weak)     | 4/4', 5/5', 7/7',                     | 7/7', 9/9'                   |
|           |            |               | 2.35 m         | 2.35 m                 |                      |                                       |                              |
| 7,7'      | 78.6       | 76.6          | 4.15 m         | 4.07 m                 | 6/6', 8/8'           |                                       | 5/5', 32                     |
| 8,8'      | 39.8       | 39.7          |                | 2.29 m, 1.67 m         | 7/7', 9/9'           | 6/6', 7/7', 9/9', 10/10'              | 13/13'                       |
| 9,9'      | 68.9       | 69.2          | 4.21 d (11.37) | 4.31 brs               | 8/8', 10             | 8/8', 10, 13/13'                      | 6a/6a'                       |
| 10,10'    | 129.7      | 129.8         | 5.72 m         | 5.78 m                 | 9/9', 11/11', 12/12' | 9/9', 12/12'                          |                              |
| 11,11'    | 123.4      | 123.7         | 5.80 m         | 5.71 m                 | 10/10', 12/12'       | 9/9', 12/12', 13/13'                  |                              |
| 12,12'    |            | 31.5          |                | 2.08 d (17.61), 1.98 m | 11/11', 13/13'       | 10/10', 11/11', 13/13', 14/14'        |                              |
| 13,13'    | 63.5       | 64.1          |                | 3.69 m                 | 12/12', 14/14'a      |                                       | 8/8', 7/7'                   |
| 14,14'    | 36.2       | 36.7          |                | 1.84 m, 1.63 m         | 13/13', 15/15'       |                                       | 15/15'-OMe                   |
| 15,15'    | 75.7       | 75.4          |                | 4.05 m                 | 14/14'               | 14/14', 15/15'-OMe, 16/16'-Me, 16/16' | 16/16'-Me                    |
| 16,16'    |            | 41.6          |                | 1.59 m                 | 16/16'-Me, 15/15'    |                                       |                              |
| 16,16'-Me | 9.2        | 9.0           | 0.80 d (7.14)  | 0.78 d (7.02)          | 16/16'               | 15/15', 16/16', 17/17'                | 17/17'                       |
| 17,17'    | 73.6       | 73.8          |                | 3.88 m                 | 18/18'               | 15/15', 16/16', 18/18', 19/19'        | 16/16'-Me                    |
| 18,18'    | 40.9       | 40.6          |                | 1.74 m, 1.55 m         |                      |                                       |                              |
| 19,19'    | 70.0       | 69.4          | 3.99 m         | 3.88 m                 |                      |                                       |                              |
| 20,20'    |            | 42.4          |                | 1.90 m, 1.55 m         | 20/20'               |                                       |                              |
| 21,21'    | 70.3       | 70.5          |                | 5.71 m                 |                      | 1/1'                                  |                              |
| 22,22'    | 41.2       | 40.9          |                | 1.69 m                 | 22/22'               | 22/22'-Me, 23/23'                     |                              |
| 22,22'-Me | 9.9        | 10.1          | 0.91 d (6.92)  | 0.89 d (7.13)          | 22/22', 24/24'       | 21/21', 22/22', 23/23'                |                              |
| 23,23'    | 76.1       | 76.5          |                | 3.20 m                 |                      | 21/21', 22/22', 24/24'-Me, 25/25'     | 22/22'-Me, 24/24'-Me, 21/21' |
| 24,24'    | 33.4       | 33.0          |                | 1.69 m                 | 24/24'               | 23/23', 24/24'-Me                     |                              |
| 24,24'-Me |            | 17.5          | 0.96 d (7.17)  | 0.95 d (7.23)          |                      | 23/23', 24/24', 25/25'                |                              |
| 25,25'    | 23.6       | 24.0          |                | 1.35 m, 1.20 m         |                      |                                       |                              |
| 26,26'    |            | 29.8          |                | 1.86 m, 1.27 m         |                      |                                       |                              |

|            |       |       |                |                |        |                         |
|------------|-------|-------|----------------|----------------|--------|-------------------------|
| 27,27'     | 71.4  | 71.3  |                | 3.98 m         |        |                         |
| 28,28'     | 35.1  | 35.0  |                | 1.81 m, 1.59 m |        | 29/29', 30/30'          |
| 29,29'     |       | 73.4  |                | 3.52 m         |        | 29/29'-OMe              |
| 30,30'     |       | 38.8  |                | 1.98 m, 1.19 m |        | ,                       |
| 31,31'     | 64.8  | 64.9  |                | 3.69 m         |        | 29/29', 31/31'-Me       |
| 31,31'-Me  | 21.9  | 22.0  | 1.17 d (5.90)  | 1.19 d (6.44)  | 31/31' | 30/30', 31/31'          |
| 32,32'     | 101.4 | 102.9 | 4.81 d (4.98)  | 4.46 d (5.45)  |        | 7/7', 33, 36/36'        |
| 33,33'     | 73.1  | 73.3  | 4.74 t (6.11)  | 3.27 m         | 34/34' | 32/32', 34/34', 35, 37  |
| 34,34'     | 82.1  | 83.3  | 3.32 m         | 3.25 m         | 33/33' | 33', 34/34'-OMe, 35/35' |
| 35,35'     |       | 79.2  |                | 3.31 m         |        | 32/32'                  |
| 36,36'     | 62.2  | 62.5  | 4.01 m, 3.25 m | 4.00 m, 3.23 m | 35/35' | 34/34'                  |
| 37,37'     | 170.5 | /N    |                |                |        | 32/32', 34/34'          |
| 38,38'     | 72.6  | /N    | 4.13 m         | N              | 39/39' | 37, 39                  |
| 39,39'     | 64.6  | /N    | 3.77 m, 3.63 m | N              | 38/38' | 3/3'                    |
| 15,15'-OMe | 57.6  | 57.5  | 3.35 s         | 3.33 s         |        | 37                      |
| 29,29'-OMe |       | 55.4  |                | 3.32 s         |        |                         |
| 34,34'-OMe |       | 60.1  | 3.47 s         | 3.56 s         |        |                         |
| 35,35'-OMe |       | 58.5  | 3.43 s         | 3.45 s         |        |                         |

---

Table S7 NMR data for samholide F (6)

|           | $\delta_C$ | $\delta_{C'}$     | $\delta_H$                   | $\delta_{H'}$                | COSY                | HMBC                              | HSQC-TOCSY                                           | ROESY            |
|-----------|------------|-------------------|------------------------------|------------------------------|---------------------|-----------------------------------|------------------------------------------------------|------------------|
| 1,1'      | 167.6      | 169.5             |                              |                              |                     |                                   |                                                      |                  |
| 2,2'      | 116.5      | 115.3             | 5.68 d (12.47)               | 5.81 d (15.68)               | 3/3'                | 1'/1,4/4'                         | 3/3', 2/2'                                           | 4/4'-Me,         |
| 3,3'      | 148.7      | 151.1             | 6.52 d (12.62)               | 7.44 d (15.54)               | 2/2'                | 1'/1, 2/2', 4/4', 4/4'-Me, 5/5'   | 2/2', 3/3',                                          | 5/5'             |
| 4,4'      |            | 134.7             |                              |                              |                     |                                   |                                                      |                  |
| 4,4'-Me   | 15.8       | 12.6              | 1.86 s                       | 1.81 s                       | 5/5' (weak)         | 3/3', 4/4', 5/5'                  | 4/4'-Me, 5/5'                                        | 2/2', 6/6'       |
| 5,5'      | 134.1      | 138.5             | 5.86 t (7.00)                | 6.14 t (6.87)                | 6/6', 4/4'-Me       | 4/4'-Me, 3/3', 6/6', 7/7'         | 4/4'-Me, 6/6', 8/8', 9/9', 7/7', 5/5'                | 7/7', 3/3', 8/8' |
| 6,6'      |            | 33                | 2.57 ddd (4.06, 6.48, 13.87) | 2.69 ddd (4.38, 6.03, 11.73) | 5/5', 7/7'          | 4/4', 5/5', 7/7', 8/8'            | 4/4'-Me, 6/6', 8/8', 9/9', 7/7', 5/5'                | 9/9', 4/4'-Me    |
|           |            |                   | 2.40 dt (7.02, 15.36)        | 2.28 dt (7.45, 15.12)        |                     |                                   |                                                      |                  |
| 7,7'      | 77.0       | 75.7              | 4.00 m                       | 3.97 m                       | 6/6', 8/8'          | 5/5', 32/32'                      | 6/6', 8/8', 9/9', 7/7', 5/5'                         | 5/5', 32/32'     |
| 8,8'      | 39.6       | 39.3              | 2.10 m                       | 2.10 m                       | 7/7', 9/9'          | 6/6', 7/7', 9/9', 10/10'          | 5/5', 7/7', 9/9', 8/8', 6/6'                         | 13/13'           |
|           |            |                   | 1.55 m                       | 1.67 m                       |                     |                                   |                                                      |                  |
| 9,9'      | 69.0       | 69.6              | 4.29 m                       | 4.39 m                       | 8/8', 10/10' (weak) | 8/8', 10/10', 11/11', 13/13',     | 6/6', 12/12', 8/8', 9/9', 7/7', 10/10', 11/11', 5/5' | 6a/6a', 7/7'     |
| 10,10'    |            | 129.6             | 5.69 m                       | 5.78 m                       | 9/9', 11/11'        | 9/9', 12/12'                      | 12/12', 14/14', 8/8', 13/13', 9/9', 10/10', 11/11'   |                  |
| 11,11'    | 124.0      | 123.8             | 5.80 m                       | 5.69 m                       | 10/10', 12/12'      | 9/9', 12/12', 13/13'(weak)        | 12/12', 14/14', 8/8', 13/13', 9/9', 10/10', 11/11'   |                  |
| 12,12'    | 31.3       | 31.2              |                              | 1.97 m                       | 11/11', 13/13'      | 11/11', 13/13', 14/14'            | 12/12', 14/14', 13/13', 7/7', 10/10', 11/11'         |                  |
| 13,13'    | 64.4       | 64.3              |                              | 3.68 m                       | 12/12', 14/14'a     |                                   | 12/12', 14/14', 15/15', 13/13'                       | 8/8'             |
| 14,14'    | 35.7       | 35.6              |                              | 1.88 m, 1.56 m               | 13/13', 15/15'      | 12/12', 13/13', 15/15', 16/16'    | 12/12', 14/14', 13/13', 15/15'                       |                  |
| 15,15'    |            | 77.0 <sup>a</sup> | 3.78 ma                      | 3.82 ma                      | 14/14'              | 15/15'-OMe, 16/16'-Me, 16/16'     | 12/12', 14/14', 13/13', 15/15',                      |                  |
| 16,16'    | 40.9       | 40.5              |                              | 1.65 m                       | 16/16'-Me, 15/15'   | 16/16'-Me, 17/17'                 | 13/13', 15/15', 16/16', 14/14', 16,16'-Me            |                  |
| 16,16'-Me | 10.2       | 9.9               | 0.82 d (6.91)                | 0.81 d (7.13)                | 16/16'              | 15/15', 16/16', 17/17'            | 16,16'-Me, 16/16', 19/19', 17/17', 18/18'            |                  |
| 17,17'    | 74.3       | 74.2              | 3.76 m                       | 3.86 m                       | 18/18'              | 15/15', 16/16'-Me, 18/18', 19/19' | 16/16'-Me, 18/18', 17/17', 19/19'                    | 16/16'-Me        |
| 18,18'    | 41.7       | 41.4              |                              | 1.70 m, 1.55 m               | 17/17', 19/19'      | 17/17', 19/19'                    | 17/17', 18/18', 19/19', 20/20'                       |                  |
| 19,19'    |            | 69                |                              | 3.88 m                       | 18/18', 20/20'      | 17/17', 18/18'                    | 20/20', 21/21', 19/19', 18/18'                       |                  |
| 20,20'    |            | 41.8              |                              | 1.87 m, 1.53 m               | 19/19', 21/21'      | 21/21'                            | 20/20', 21/21', 19/19'                               |                  |

|           |       |       |                      |                |                           |                                                     |                                                   |                              |
|-----------|-------|-------|----------------------|----------------|---------------------------|-----------------------------------------------------|---------------------------------------------------|------------------------------|
| 21,21'    | 71.3  | 70.8  | 5.60 d (10.39)       | 5.63 d (10.00) | 20/20', 22/22'            | 1/1', 19/19', 23/23', 20/20', 22/22', 22/22'-Me     | 20/20', 19/19'                                    | 19/19', 23/23'               |
| 22,22'    | 41.1  | 40.9  |                      | 1.76 m         | 22/22'-Me, 21/21', 23/23' | 22/22'-Me, 23/23'                                   | 22,22'-Me, 25/25', 26/26', 24/24', 22/22', 23/23' |                              |
| 22,22'-Me | 10.3  |       | 0.89 d (6.78)        | 0.88 d (6.78)  | 22/22'                    | 21/21', 22/22', 23/23'                              | 22,22'-Me, 22/22', 23/23'                         |                              |
| 23,23'    | 76.7  |       | 3.15 d (9.39)        | 3.12 d (9.83)  | 22/22', 24/24'            | 21/21', 22/22', 22/2'-Me, 24/24'-Me, 24/24', 25/25' | 22/22'-Me, 22/22', 23/23'                         | 22/22'-Me, 24/24'-Me, 21/21' |
| 24,24'    | 33.4  |       |                      | 1.68 m         | 24/24'-Me,                | 22/22'-Me, 24/24'-Me                                | 24/24'-Me, 25/25', 26/26', 24/24', 22/22', 23/23' |                              |
| 24,24'-Me | 17.6  |       | 0.98 d (6.80)        | 0.96 d (6.80)  | 24/24'                    | 23/23', 24/24', 25/25'                              | 24,24'-Me, 26/26', 24/24', 27/27', 25/25'         |                              |
| 25,25'    | 24    |       |                      | 1.39 m, 1.24 m | 26/26',                   |                                                     | 24,24'-Me, 26/26', 25/25', 24/24', 27/27'         |                              |
| 26,26'    | 29.3  |       |                      | 1.87 m, 1.25 m | 25/25', 27/27',           |                                                     | 24/24'-Me, 25/25', 26/26', 27/27'                 |                              |
| 27,27'    | 71.5  |       |                      | 3.99 m         | 26/26', 28/28'            | 29/29', 31/31'                                      | 24/24'-Me, 25/25', 26/26', 28/28', 30/30', 29/29' | 29/29'-OMe, 31/31'           |
| 28,28'    | 35    |       |                      | 1.82 m, 1.58 m | 29/29', 30/30'            |                                                     | 31/31', 30/30', 28/28', 29/29', 27/27'            |                              |
| 29,29'    | 73.4  |       |                      | 3.52 m         | 28/28', 31/31'            | 27/27', 28/28', 31/31'                              | 28/28', 29/29', 30/30', 31/31', 31/31'-Me,        | 31/31'                       |
| 30,30'    | 38.9  |       |                      | 1.99 m, 1.18 m | 29/29',                   |                                                     | 31/31'-Me, 28/28', 30/30', 31/31', 29/29'         |                              |
| 31,31'    | 64.7  |       |                      | 3.69 m         | 31/31'-Me                 | 29/29', 31/31'-Me                                   | 31/31'-Me, 28/28', 30/30', 31/31', 29/29'         |                              |
| 31,31'-Me | 22    |       |                      | 1.19 d (6.25)  | 31/31'                    | 30/30', 31/31'                                      | 31,31'-Me, 30/30', 31/31', 28/28', 29/29'         |                              |
| 32,32'    | 100.4 | 102.1 | 4.65 d (6.77)        | 4.39 d (6.72)  |                           | 7/7', 34/34', 36/36'                                | 32/32', 33/33', 34/34', 35/35', 36/36'            | 7/7', 34/34', 5/5', 6/6'     |
| 33,33'    | 73.4  |       | 4.83 dd (6.85, 8.39) | 3.52 m         | 34/34'                    | 32/32', 34/34', 37/37', 35/35'                      | 32/32', 33/33', 34/34', 35/35', 36/36'            | 34-OMe, 36                   |
| 34,34'    | 82.0  | 83.5  | 3.35 m               | 3.21 m         | 33/33'                    |                                                     | 32/32', 33/33', 34/34', 35/35', 36/36'            |                              |
| 35,35'    | 79.1  |       |                      | 3.30 m         |                           | 34/34', 36/36', 35/35'-OMe                          | 32/32', 33/33', 34/34', 35/35', 36/36'            |                              |



|            |       |                   |                |        |        |                        |                                           |
|------------|-------|-------------------|----------------|--------|--------|------------------------|-------------------------------------------|
| 36,36'     | 62.6  |                   | 3.99 m, 3.25 m |        | 35/35' | 32/32', 34/34', 35/35' | 32/32', 33/33', 34/34', 35/35',<br>36/36' |
| 37,37'     | 171.5 | N                 |                |        |        |                        |                                           |
| 38,38'     | 72.4  | N                 | 4.27 m         | N      | 39/39' | 37/37', 39/39'         | 38/38', 39/39'                            |
| 39,39'     | 64.3  | N                 | 3.80 m         | N      | 38/38' | 37/37'                 | 38/38', 39/39'                            |
| 15,15'-OMe | 57.2  | 57.1              | 3.34 s         | 3.32 s |        | 15,15'                 |                                           |
| 29,29'-OMe | 55.4  |                   |                | 3.32 s |        | 29,29'                 |                                           |
| 34,34'-OMe | 60.2  | 60.3              |                | 3.48 s |        | 34                     |                                           |
| 35,35'-OMe | 58.7  | 58.5 <sup>a</sup> |                | 3.44 s |        | 35                     |                                           |

<sup>a</sup> Overlapped with CDCl<sub>3</sub>, assigned using HMBC, HSQC and HSQC-TOCSY.

Table S8 NMR data for samholide G (7)

|           | $\delta_C$        | $\delta_{C'}$     | $\delta_H$     | $\delta_{H'}$            | COSY                 | HMBC                                               | HSQC-TOCSY                                              | ROESY           |
|-----------|-------------------|-------------------|----------------|--------------------------|----------------------|----------------------------------------------------|---------------------------------------------------------|-----------------|
| 1,1'      | 169.5             | 167.4             |                |                          |                      |                                                    |                                                         |                 |
| 2,2'      | 114.5             | 116.2             | 5.80 m         | 5.66 d (12.72)           | 3/3'                 | 1/1', 3/3', 4/4'                                   | 3/3', 2/2'                                              | 4-Me            |
| 3,3'      | 153.9             | 148.3             | 7.47 d (15.63) | 6.46 d (12.69)           | 2/2'                 | 1.1', 2/2', 4, 4/4'-Me, 5/5'                       | 2/2', 3/3',                                             | 5/5', 38, 4'-Me |
| 4,4'      | 134.1             |                   |                |                          |                      |                                                    |                                                         |                 |
| 4,4'-Me   | 12.5              | 16.1              | 1.78 s         | 1.86 s                   | 5/5'                 | 3/3', 4/4', 5/5'                                   | 4/4'-Me, 5/5'                                           | 2/2', 6/6'      |
| 5,5'      | 140               | 134               | 6.11 t (6.88)  | 5.97 brs                 | 6/6', 4/4'-Me        | 4/4'-Me, 3, 6, 7                                   | 4/4'-Me, 6/6', 8/8', 9/9', 7/7', 5/5'                   | 7/7', 3/3'      |
| 6,6'      | 33.6              | 33.2              | 2.59 m         | 2.57 m                   | 5/5', 7/7'           | 4/4', 5/5', 7/7', 8/8'                             | 4/4'-Me, 6/6', 8/8', 9/9', 7/7', 5/5'                   | 9/9'            |
|           |                   |                   | 2.34 m         | 2.41 dt (7.38,<br>14.56) |                      |                                                    |                                                         |                 |
| 7,7'      | 77.2              | 76.7 <sup>b</sup> | 4.03 m         | 3.97 m                   | 6/6', 8/8'           | 32/32'                                             | 6/6', 8/8', 9/9', 7/7', 5/5'                            | 5/5', 32/32'    |
| 8,8'      | 39.5              | 39.1              | 2.19 m         | 2.05 m                   | 7/7', 9/9'           | 7/7'                                               | 5/5', 7/7', 9/9', 8/8', 6/6'                            | 13/13'          |
|           |                   |                   | 1.54 m         | 1.64 m                   |                      |                                                    |                                                         |                 |
| 9,9'      | 69.4              | 69.7              | 4.28 m         | 4.38 m                   | 8/8', 10/10'         |                                                    | 6/6', 12/12', 8/8', 9/9', 7/7', 10/10', 11/11',<br>5/5' | 6a/6a'          |
| 10,10'    | 129.5             | 129.6             |                | 5.71 m                   | 9/9', 11/11', 12/12' | 9/9', 12/12'                                       | 12/12', 14/14', 8/8', 13/13', 9/9', 10/10',<br>11/11'   |                 |
| 11,11'    | 123.9             | 123.6             |                | 5.74 m                   | 10/10', 12/12'       | 9/9', 12/12', 13/13'                               | 12/12', 14/14', 8/8', 13/13', 9/9', 10/10',<br>11/11'   |                 |
| 12,12'    | 31.4              |                   |                | 1.95 m                   | 11/11', 13/13'       | 10/10', 11/11', 13/13', 14/14'                     | 12/12', 14/14', 13/13', 7/7', 10/10', 11/11'            |                 |
| 13,13'    | 64.5              |                   |                | 3.79 m                   | 12/12', 14/14'a      |                                                    | 12/12', 14/14', 15/15', 13/13'                          |                 |
| 14,14'    | 36.1              | 35.9              | 1.84 m, 1.58 m |                          | 13/13', 15/15'       | 16/16'                                             | 12/12', 14/14', 13/13', 15/15'                          |                 |
| 15,15'    | 77.0 <sup>b</sup> |                   |                | 3.82 m                   | 14/14'               |                                                    | 12/12', 14/14', 13/13', 15/15',                         | 16/16'-Me       |
| 16,16'    | 40.8              | 40.6              |                | 1.63 m                   | 16/16'-Me, 15/15'    |                                                    | 13/13', 15/15', 16/16', 14/14', 16,16'-Me               |                 |
| 16,16'-Me | 9.9               |                   | 0.83 d (7.13)  | 0.84 d (7.75)            | 16/16'               | 15/15', 16/16', 17/17'                             | 16,16'-Me, 16/16', 19/19', 17/17', 18/18'               |                 |
| 17,17'    | 74.3              | 74.1              |                | 3.79 m                   | 18/18'               |                                                    | 16/16'-Me, 18/18', 17/17', 19/19'                       | 16/16'-Me,      |
| 18,18'    | 41.7              | 41.5              |                | 1.85 m, 1.50 m           |                      |                                                    | 17/17', 18/18', 19/19', 20/20'                          |                 |
| 19,19'    | 69.8              | 68.3              | 3.87 m         | 3.85 m                   |                      | 17/17'                                             | 20/20', 21/21', 19/19', 18/18'                          |                 |
| 20,20'    | 42.1              |                   |                | 1.87 m, 1.57 m           | 20/20'               |                                                    | 20/20', 21/21', 19/19'                                  |                 |
| 21,21'    | 70.9              | 71.3              | 5.65 m         | 5.69 m                   |                      | 1/1', 19/19', 23/23', 20/20', 22/22',<br>22/22'-Me | 20/20', 19/19'                                          | 19/19', 23/23'  |
| 22,22'    | 41.3              | 40.9              |                | 1.73 m                   | 22/22'               | 22/22'-Me, 23/23'                                  | 22,22'-Me, 25/25', 26/26', 24/24',<br>22/22', 23/23'    |                 |

|            |       |                   |                      |                |                |                                           |                                                   |                               |
|------------|-------|-------------------|----------------------|----------------|----------------|-------------------------------------------|---------------------------------------------------|-------------------------------|
| 22,22'-Me  | 10.3  | 10.2              | 0.86 d (7.03)        | 0.90 d (6.95)  | 22/22', 24/24' | 21/21', 22/22', 23/23'                    | 22,22'-Me, 22/22', 23/23'                         |                               |
| 23,23'     | 76.3  |                   |                      | 3.12 m         |                | 21/21', 22/22', 24/24', 24/24'-Me, 25/25' | 22/22'-Me, 22/22', 23/23'                         | 22/22'-Me, 24/24'-Me, 21/21', |
| 24,24'     | 33    |                   |                      | 1.66 m         | 24/24'         |                                           | 24/24'-Me, 25/25', 26/26', 24/24', 22/22', 23/23' |                               |
| 24,24'-Me  | 17.6  |                   | 0.97 d (6.18)        | 0.96 d (6.3)   |                | 23/23', 24/24', 25/25'                    | 24,24'-Me, 26/26', 24/24', 27/27', 25/25'         |                               |
| 25,25'     | 24.2  | 23.6              |                      | 1.35 m, 1.24 m |                | 24/24'-Me, 26/26',                        | 24,24'-Me, 26/26', 25/25', 24/24', 27/27'         |                               |
| 26,26'     | 29.3  | 29.2              |                      | 1.86 m, 1.22 m |                | 25/25', 27/27'                            | 24/24'-Me, 25/25', 26/26', 27/27'                 |                               |
| 27,27'     | 71.5  | 71.7              |                      | 3.97 m         |                | 29/29', 31/31'                            | 24/24'-Me, 25/25', 26/26', 28/28', 30/30', 29/29' | 29/29'-OMe                    |
| 28,28'     | 35    |                   |                      | 1.80 m, 1.57 m |                | 29/29', 30/30'                            | 31/31', 30/30', 28/28', 29/29', 27/27'            |                               |
| 29,29'     | 73.4  |                   |                      | 3.52 m         |                | 27/27', 28/28', 31/31', 29/29'-OMe        | 28/28', 29/29', 30/30', 31/31', 31/31'-Me,        |                               |
| 30,30'     | 38.9  |                   |                      | 1.94 m, 1.17 m |                | 29/29'                                    | 31/31'-Me, 28/28', 30/30', 31/31', 29/29'         |                               |
| 31,31'     | 64.7  |                   |                      | 3.67 m         |                | 29/29'                                    | 31/31'-Me, 28/28', 30/30', 31/31', 29/29'         |                               |
| 31,31'-Me  | 21.9  |                   | 1.18 d (6.24)        | 1.20 d (6.3)   | 31/31'         | 30/30', 31/31'                            | 31,31'-Me, 30/30', 31/31', 28/28', 29/29'         |                               |
| 32,32'     | 100.8 | 102.5             | 4.71 m               | 4.43 d (6.29)  |                |                                           | 32/32', 33/33', 34/34', 35/35', 36/36'            | 7/7', 34/34', 5/5'            |
| 33,33'     | 73.4  | 72.9              | 4.83 dd (7.18, 8.13) | 3.37 m         | 34/34'         | 32/32', 34/34', 37                        | 32/32', 33/33', 34/34', 35/35', 36/36'            | 35, 35-OMe                    |
| 34,34'     | 82.4  | 83.6              | 3.31 m               | 3.21 m         | 33/33'         | 32/32', 34/34'-OMe, 35/35'                | 32/32', 33/33', 34/34', 35/35', 36/36'            | 32/32'                        |
| 35,35'     | 79.3  |                   | 3.31 m               | 3.26 m         |                | 33/33', 35/35'-OMe                        | 32/32', 33/33', 34/34', 35/35', 36/36'            |                               |
| 36,36'     | 62.7  |                   |                      | 3.99 m, 3.23 m | 35/35'         | 32/32', 34/34'                            | 32/32', 33/33', 34/34', 35/35', 36/36'            |                               |
| 37,37'     | 170.8 | N                 |                      |                |                |                                           |                                                   |                               |
| 38,38'     | 72.4  | N                 | 4.21 m               | N              | 39/39'         |                                           | 38/38', 39/39'                                    | 3                             |
| 39,39'     | 64.5  | N                 | 3.81 m               | N              | 38/38'         |                                           | 38/38', 39/39'                                    |                               |
| 15,15'-OMe | 57.3  | 56.9              | 3.34 s               | 3.32 s         |                | 15/15'                                    |                                                   |                               |
| 29,29'-OMe | 55.4  |                   |                      | 3.34 s         |                | 29/29'                                    |                                                   |                               |
| 34,34'-OMe | 60.2  | 60.1              | 3.48 s               | 3.58 s         |                | 34                                        |                                                   |                               |
| 35,35'-OMe | 58.6  | 58.5 <sup>a</sup> | 3.44 s               | 3.45s          |                | 35                                        |                                                   |                               |

Table S9 NMR data for samholide H (8)

|           | $\delta_C$        | $\delta_{C'}$ | $\delta_H$       | $\delta_{H'}$    | COSY                 | HMBC                            | HSQC-TOCSY                                           | ROESY                      |
|-----------|-------------------|---------------|------------------|------------------|----------------------|---------------------------------|------------------------------------------------------|----------------------------|
| 1,1'      | 170.3             |               |                  |                  |                      |                                 |                                                      |                            |
| 2,2'      | 114.3             | 113.9         | 5.80 d (15.6)    |                  | 3/3'                 | 1/1',4/4'                       | 3/3', 2/2'                                           | 4/4'-Me                    |
| 3,3'      | 152.2             | 152.1         | 7.55 d (15.6)    |                  | 2/2'                 | 1/1', 2/2', 4/4', 4/4'-Me, 5/5' | 2/2', 3/3',                                          | 5/5'                       |
| 4,4'      | 134.4             |               |                  |                  |                      |                                 |                                                      |                            |
| 4,4'-Me   | 12.5              | 12.4          | 1.83 s           |                  | 5/5'                 | 3/3', 4/4', 5/5'                | 4/4'-Me, 5/5'                                        | 2/2', 6/6'                 |
| 5,5'      | 141               | 134           | 6.35 m           |                  | 6/6', 4/4'-Me        | 4/4'-Me, 3/3'                   | 4/4'-Me, 6/6', 8/8', 9/9', 7/7', 5/5'                | 7/7', 3/3'                 |
| 6,6'      | 33.6              | 33.3          | 2.60 m, 2.38 m   |                  | 5/5', 7/7'           | 4/4', 5/5', 7/7'                | 4/4'-Me, 6/6', 8/8', 9/9', 7/7', 5/5'                | 5/5', 9/9'                 |
| 7,7'      | 76.0              | 76.3          | 4.08 m           |                  | 6/6', 8/8'           |                                 | 6/6', 8/8', 9/9', 7/7', 5/5'                         | 5/5', 32/32'               |
| 8,8'      | 39.8              | 39.7          | 2.26 m, 1.62 m   |                  | 7/7', 9/9'           | 6/6', 7/7', 9/9'                | 5/5', 7/7', 9/9', 8/8', 6/6'                         | 13/13'                     |
| 9,9'      | 69.6              |               | 4.29 m           |                  | 8/8', 10/10'         |                                 | 6/6', 12/12', 8/8', 9/9', 7/7', 10/10', 11/11', 5/5' | 6a/6a', 10/10', 14/14'     |
| 10,10'    | 129.8             |               | 5.74 m           |                  | 9/9', 11/11', 12/12' | 9/9', 12/12'                    | 12/12', 14/14', 8/8', 13/13', 9/9', 10/10', 11/11'   |                            |
| 11,11'    | 123.6             |               | 5.77 m           |                  | 10/10', 12/12'       | 9/9', 12/12'                    | 12/12', 14/14', 8/8', 13/13', 9/9', 10/10', 11/11'   |                            |
| 12,12'    | 31.4              | 31.6          | 1.97 m           |                  | 11/11', 13/13'       | 10/10', 11/11', 13/13', 14/14'  | 12/12', 14/14', 13/13', 7/7', 10/10', 11/11'         |                            |
| 13,13'    | 63.7              | 63.5          | 3.64 m           |                  | 12/12', 14/14'a      |                                 | 12/12', 14/14', 15/15', 13/13'                       |                            |
| 14,14'    | 36.9              | 36.8          | 1.77 m, 1.64 m   |                  | 13/13', 15/15'       | 15/15'                          | 12/12', 14/14', 13/13', 15/15'                       |                            |
| 15,15'    | 75.8              | 76.0          | 4.08 m           |                  | 14/14'               |                                 | 12/12', 14/14', 13/13', 15/15',                      | 6a/6a', 5/5', 14/14', 8/8' |
| 16,16'    | 41.5              | 41.4          | 1.66 m           |                  | 16/16'-Me, 15/15'    | 16/16'-Me                       | 13/13', 15/15', 16/16', 14/14', 16,16'-Me            |                            |
| 16,16'-Me | 9.4               | 9.3           | 0.79 d<br>(6.36) | 0.78 d<br>(6.35) | 16/16'               | 15/15', 16/16', 17/17'          | 16,16'-Me, 16/16', 19/19', 17/17', 18/18'            |                            |
| 17,17'    | 74.0              | 74.1          | 3.85 m           |                  | 18/18'               |                                 | 16/16'-Me, 18/18', 17/17', 19/19'                    | 16/16'-Me,                 |
| 18,18'    | 40.8              |               | 1.72 m, 1.41 m   |                  |                      | 17/17'                          | 17/17', 18/18', 19/19', 20/20'                       |                            |
| 19,19'    | 69.8              |               | 3.90 m           |                  |                      |                                 | 20/20', 21/21', 19/19', 18/18'                       |                            |
| 20,20'    | 42.1              | 42.0          | 1.85 m, 1.53 m   |                  | 20/20'               |                                 | 20/20', 21/21', 19/19'                               |                            |
| 21,21'    | 70.7              | 70.6          | 5.55 d (11.17)   |                  |                      | 1/1', 19/19', 22/22', 22/22'-Me | 20/20', 19/19'                                       | 19/19'                     |
| 22,22'    | 40.8              | 40.7          | 1.76 m           |                  | 22/22'               |                                 | 22,22'-Me, 25/25', 26/26', 24/24', 22/22', 23/23'    |                            |
| 22,22'-Me | 10.3              | 10.2          | 0.91 m           |                  | 22/22', 24/24'       | 21/21', 22/22', 23/23'          | 22,22'-Me, 22/22', 23/23'                            |                            |
| 23,23'    | 76.8 <sup>a</sup> |               | 3.20 m           |                  |                      |                                 | 22/22'-Me, 22/22', 23/23'                            | 22/22'-Me, 24/24'-Me       |
| 24,24'    | 33.2              | 33.3          | 1.68 m           |                  | 24/24'               | 23/23', 24/24'-Me               | 24/24'-Me, 25/25', 26/26', 24/24', 22/22', 23/23'    |                            |
| 24,24'-Me | 17.5              | 17.4          | 0.93 m           |                  |                      | 23/23', 24/24', 25/25'          | 24,24'-Me, 26/26', 24/24', 27/27', 25/25'            |                            |
| 25,25'    | 24                |               | 1.36 m, 1.21 m   |                  |                      | 24/24'-Me                       | 24,24'-Me, 26/26', 25/25', 24/24', 27/27'            |                            |
| 26,26'    | 29.4              | 29.5          | 1.84 m, 1.26 m   |                  |                      | 27/27'                          | 24/24'-Me, 25/25', 26/26', 27/27'                    |                            |
| 27,27'    | 71.1              | 71.0          | 3.97 m           |                  |                      |                                 | 24/24'-Me, 25/25', 26/26', 28/28', 30/30', 29/29'    | 29/29'-OMe                 |

|            |       |       |                  |                  |        |                            |                                            |
|------------|-------|-------|------------------|------------------|--------|----------------------------|--------------------------------------------|
| 28,28'     | 35    |       | 1.79 m, 1.58 m   |                  |        |                            | 31/31', 30/30', 28/28', 29/29', 27/27'     |
| 29,29'     | 73.4  |       | 3.52 m           |                  |        | 29/29'-OMe                 | 28/28', 29/29', 30/30', 31/31', 31/31'-Me, |
| 30,30'     | 38.7  |       | 1.97 m, 1.17 m   |                  |        | 29/29', 31/31'             | 31/31'-Me, 28/28', 30/30', 31/31', 29/29'  |
| 31,31'     | 64.9  |       | 3.70 m           |                  |        |                            | 31/31'-Me, 28/28', 30/30', 31/31', 29/29'  |
| 31,31'-Me  | 21.9  |       | 1.21 d (6.6)     | 31/31'           |        | 30/30', 31/31'             | 31,31'-Me, 30/30', 31/31', 28/28', 29/29'  |
| 32,32'     | 103.2 | 102.9 | 4.47 d<br>(6.69) | 4.53 d<br>(5.45) |        | 7/7', 36/36'               | 32/32', 33/33', 34/34', 35/35', 36/36'     |
| 33,33'     | 73.1  | 72.1  | 3.36 m           | 3.29 m           | 34/34' | 32/32', 34/34'             | 32/32', 33/33', 34/34', 35/35', 36/36'     |
| 34,34'     | 83.2  | 83.3  | 3.20 m           | 3.26 m           | 33/33' | 33/33', 34/34'-OMe, 35/35' | 32/32', 33/33', 34/34', 35/35', 36/36'     |
| 35,35'     | 79.3  | 68.9  | 3.29 m           | 3.36 m           |        |                            | 32/32', 33/33', 34/34', 35/35', 36/36'     |
| 36,36'     | 62.5  | 64.2  | 3.99 m           | 3.96 m           | 35/35' | 32/32', 34/34', 35/35'     | 32/32', 33/33', 34/34', 35/35', 36/36'     |
|            |       |       | 3.18 m           | 3.31 m           |        |                            |                                            |
| 15,15'-OMe | 57.5  |       | 3.35 s           | 3.36 s           |        | 15,15'                     |                                            |
| 29,29'-OMe | 55.5  |       |                  | 3.34 s           |        | 29,29'                     |                                            |
| 34,34'-OMe | 60.1  | 59.8  |                  | 3.55 s           |        | 34,34'                     |                                            |
| 35,35'-OMe | 58.5  | N     | 3.45             | N                |        | 35                         |                                            |

<sup>a</sup> Overlapped with CDCl<sub>3</sub>, assigned using HMBC, HSQC and HSQC-TOCSY.

Table S10 NMR data for samholide I (9)

|           | $\delta_C/\delta_C'$ | $\delta_H/\delta_H'$                                  | COSY                 | HMBC                                  | HSQC-TOCSY                                           | ROESY                     |
|-----------|----------------------|-------------------------------------------------------|----------------------|---------------------------------------|------------------------------------------------------|---------------------------|
| 1,1'      | 169.6                |                                                       |                      |                                       |                                                      |                           |
| 2,2'      | 114.5                | 5.80 d (15.62)                                        | 3/3'                 | 1/1', 4/4'                            | 3/3', 2/2'                                           | 4/4'-Me                   |
| 3,3'      | 152                  | 7.47 d (15.62)                                        | 2/2'                 | 1/1', 2/2', 4/4', 4/4'-Me, 5/5'       | 2/2', 3/3',                                          | 5/5'                      |
| 4,4'      | 134.2                |                                                       |                      |                                       |                                                      |                           |
| 4,4'-Me   | 12.5                 | 1.80 s                                                |                      | 3/4', 4/4', 5/5'                      | 4/4'-Me, 5/5'                                        | 2/2'                      |
| 5,5'      | 140.3                | 6.19 t (7.03)                                         | 6/6'                 | 4/4'-Me, 3/3', 6/6', 7/7'             | 4/4'-Me, 6/6', 8/8', 9/9', 7/7', 5/5'                | 7/7', 3/3'                |
| 6,6'      | 36.7                 | 2.47 ddd (3.24, 7.14, 14.94)<br>2.31 dt (7.56, 15.19) | 5/5', 7/7'           | 4/4', 5/5', 7/7', 8/8'                | 4/4'-Me, 6/6', 8/8', 9/9', 7/7', 5/5'                | 8/8', 9/9'                |
| 7,7'      | 69.8                 | 4.04 m                                                | 6/6', 8/8'           |                                       | 6/6', 8/8', 9/9', 7/7', 5/5'                         | 9/9'                      |
| 8,8'      | 40.7 <sup>a</sup>    | 1.89 m, 1.52 m                                        | 7/7'                 | 7/7', 9/9'                            | 5/5', 7/7', 9/9', 8/8', 6/6'                         | 7/7'                      |
| 9,9'      | 72.6                 | 4.34 d (10.74)                                        | 8/8', 10/10'         | 10/10', 13/13'                        | 6/6', 12/12', 8/8', 9/9', 7/7', 10/10', 11/11', 5/5' | 6a/6a', 7/7'              |
| 10,10'    | 129.4                | 5.65 m                                                | 9/9', 11/11', 12/12' | 9/9', 12/12'                          | 12/12', 14/14', 8/8', 13/13', 9/9', 10/10', 11/11'   |                           |
| 11,11'    | 124.2                | 5.81 m                                                | 10/10', 12/12'       |                                       | 12/12', 14/14', 8/8', 13/13', 9/9', 10/10', 11/11'   |                           |
| 12,12'    | 31.3                 | 1.98 m                                                | 11/11', 13/13'       | 10/10', 11/11', 14/14'                | 12/12', 14/14', 13/13', 7/7', 10/10', 11/11'         |                           |
| 13,13'    | 64.5                 | 3.68 m                                                | 12/12', 14/14'       |                                       | 12/12', 14/14', 15/15', 13/13'                       |                           |
| 14,14'    | 35.9                 | 1.86 m, 1.59 m                                        | 13/13', 15/15'       | 13/13', 16/16'                        | 12/12', 14/14', 13/13', 15/15'                       |                           |
| 15,15'    | 77.6                 | 3.83 m                                                | 14/14'               | 15/15'-OMe, 16/16'-Me, 16/16', 17/17' | 12/12', 14/14', 13/13', 15/15',                      | 16/16'-Me                 |
| 16,16'    | 40.5 <sup>a</sup>    | 1.68 m                                                | 16/16'-Me, 15/15'    | 16/16'-Me, 18/18', 17/17'             | 13/13', 15/15', 16/16', 14/14', 16,16'-Me            |                           |
| 16,16'-Me | 9.8                  | 0.83 d (7.02)                                         | 16/16'               | 15/15', 16/16', 17/17'                | 16,16'-Me, 16/16', 19/19', 17/17', 18/18'            |                           |
| 17,17'    | 75                   | 3.84 m                                                | 18/18'               | 15/15', 16/16', 17/17'                | 16/16'-Me, 18/18', 17/17', 19/19'                    | 16/16'-Me                 |
| 18,18'    | 40.8 <sup>a</sup>    | 1.87 m, 1.50 m                                        |                      | 17/17', 19/19'                        | 17/17', 18/18', 19/19', 20/20'                       |                           |
| 19,19'    | 69.2                 | 3.84 m                                                | 18/18', 20/20'       |                                       | 20/20', 21/21', 19/19', 18/18'                       | 21/21'                    |
| 20,20'    | 41.7                 | 1.89 m, 1.55 m                                        |                      | 21/21'                                | 20/20', 21/21', 19/19'                               |                           |
| 21,21'    | 70.4                 | 5.65 m                                                | 20/20'               | 1/1', 22/22'-Me                       | 20/20', 19/19'                                       | 19/19', 23/23', 22/22'-Me |
| 22,22'    | 40.9 <sup>a</sup>    | 1.74 m                                                |                      | 22/22'-Me, 23/23'                     | 22,22'-Me, 25/25', 26/26', 24/24', 22/22', 23/23'    |                           |
| 22,22'-Me | 10.2                 | 0.91 d (6.93)                                         | 22/22'               | 21/21', 22/22', 23/23'                | 22,22'-Me, 22/22', 23/23'                            | 21/21'                    |
| 23,23'    | 76.6 <sup>b</sup>    | 3.14 dd (1.52, 9.66)                                  |                      | 24/24', 24/24'-Me, 25/25'             | 22/22'-Me, 22/22', 23/23'                            | 24/24'-Me, 21/21'         |
| 24,24'    | 33.3                 | 1.66 m                                                |                      |                                       | 24/24'-Me, 25/25', 26/26', 24/24', 22/22', 23/23'    |                           |
| 24,24'-Me | 17.7                 | 0.98 d (6.74)                                         | 24/24'               | 23/23', 24/24', 25/25'                | 24,24'-Me, 26/26', 24/24', 27/27', 25/25'            |                           |
| 25,25'    | 24.2                 | 1.37 m, 1.23 m                                        |                      | 24/24'-Me                             | 24,24'-Me, 26/26', 25/25', 24/24', 27/27'            |                           |
| 26,26'    | 29.4                 | 1.87 m, 1.24 m                                        |                      | 27/27', 28/28'                        | 24/24'-Me, 25/25', 26/26', 27/27'                    |                           |

|            |      |                |                |                    |                                                   |                       |
|------------|------|----------------|----------------|--------------------|---------------------------------------------------|-----------------------|
| 27,27'     | 71.6 | 3.98 m         | 26/26', 28/28' | 31/31'             | 24/24'-Me, 25/25', 26/26', 28/28', 30/30', 29/29' | 31/31'-Me, 29/29'-OMe |
| 28,28'     | 35   | 1.81 m, 1.58 m |                | 29/29', 30/30'     | 31/31', 30/30', 28/28', 29/29', 27/27'            |                       |
| 29,29'     | 73.4 | 3.52 m         | 28/28', 30/30' | 31/31', 29/29'-OMe | 28/28', 29/29', 30/30', 31/31', 31/31'-Me,        | 26/26'                |
| 30,30'     | 38.8 | 1.98 m, 1.16 m |                | 29/29',            | 31/31'-Me, 28/28', 30/30', 31/31', 29/29'         |                       |
| 31,31'     | 64.8 | 3.69 m         | 31/31'-Me      | 29/29'             | 31/31'-Me, 28/28', 30/30', 31/31', 29/29'         | 26/26'                |
| 31,31'-Me  | 22   | 1.20 d (6.18)  | 31/31'         | 30/30', 31/31'     | 31,31'-Me, 30/30', 31/31', 28/28', 29/29'         | 27/27'                |
| 15,15'-OMe | 57.2 | 3.35 s         |                | 15,15'             |                                                   |                       |
| 29,29'-OMe | 55.5 | 3.34 s         |                | 29,29'             |                                                   |                       |

<sup>a</sup> Can be exchanged.

<sup>b</sup> Overlapped with CDCl<sub>3</sub>, assigned using HMBC, HSQC and HSQC-TOCSY.

F4-a #12-18 RT: 0.29-0.44 AV: 7 SB: 1 0.17 NL: 2.81E7  
T: + c Full ms [ 300.00-2000.00]

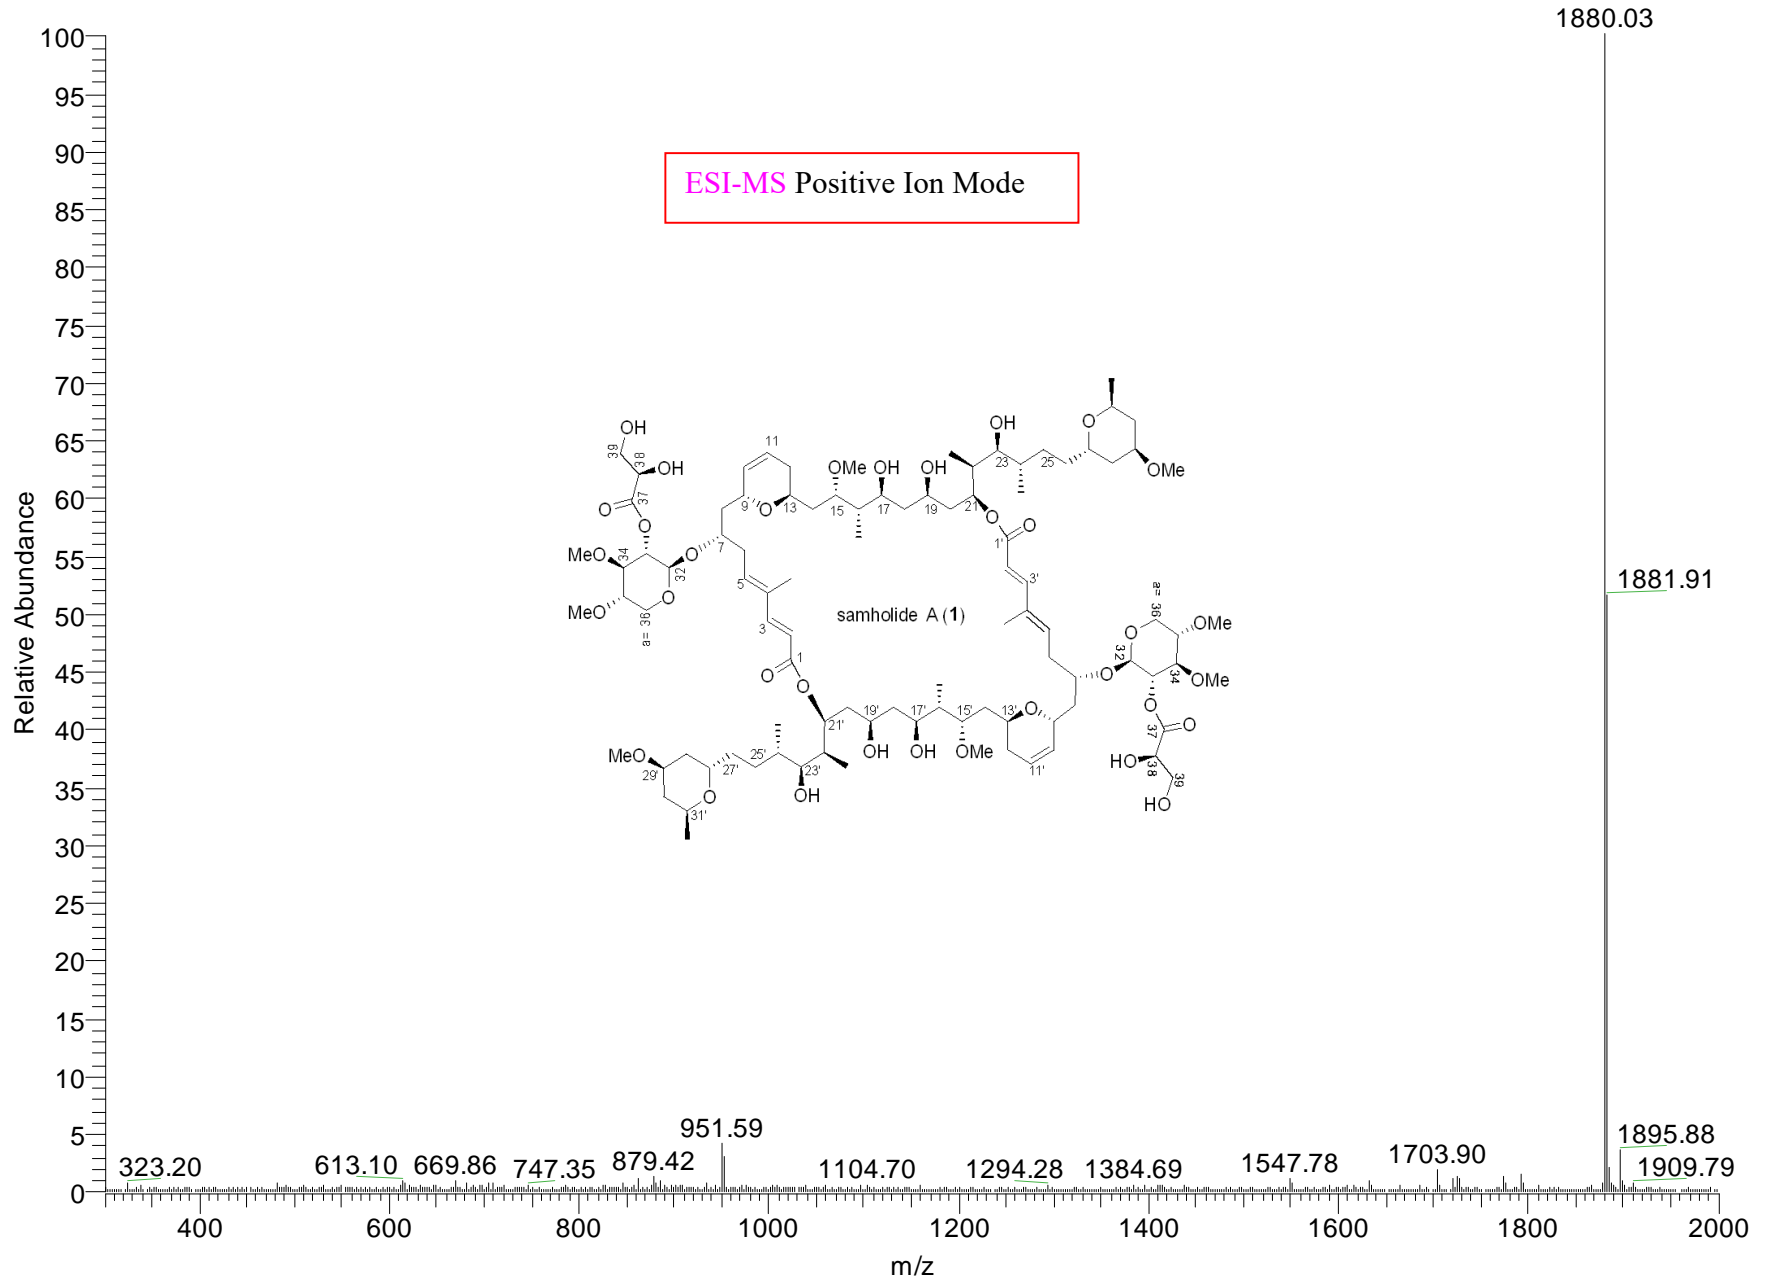

Figure S1 The ESI MS spectrum of samholide A (1)



F4-a #29-34 RT: 0.66-0.74 AV: 6 SB: 3 0.80-0.84 NL: 2.67E6  
T: + c Full ms2 1880.00@35.00 [515.00-2000.00]

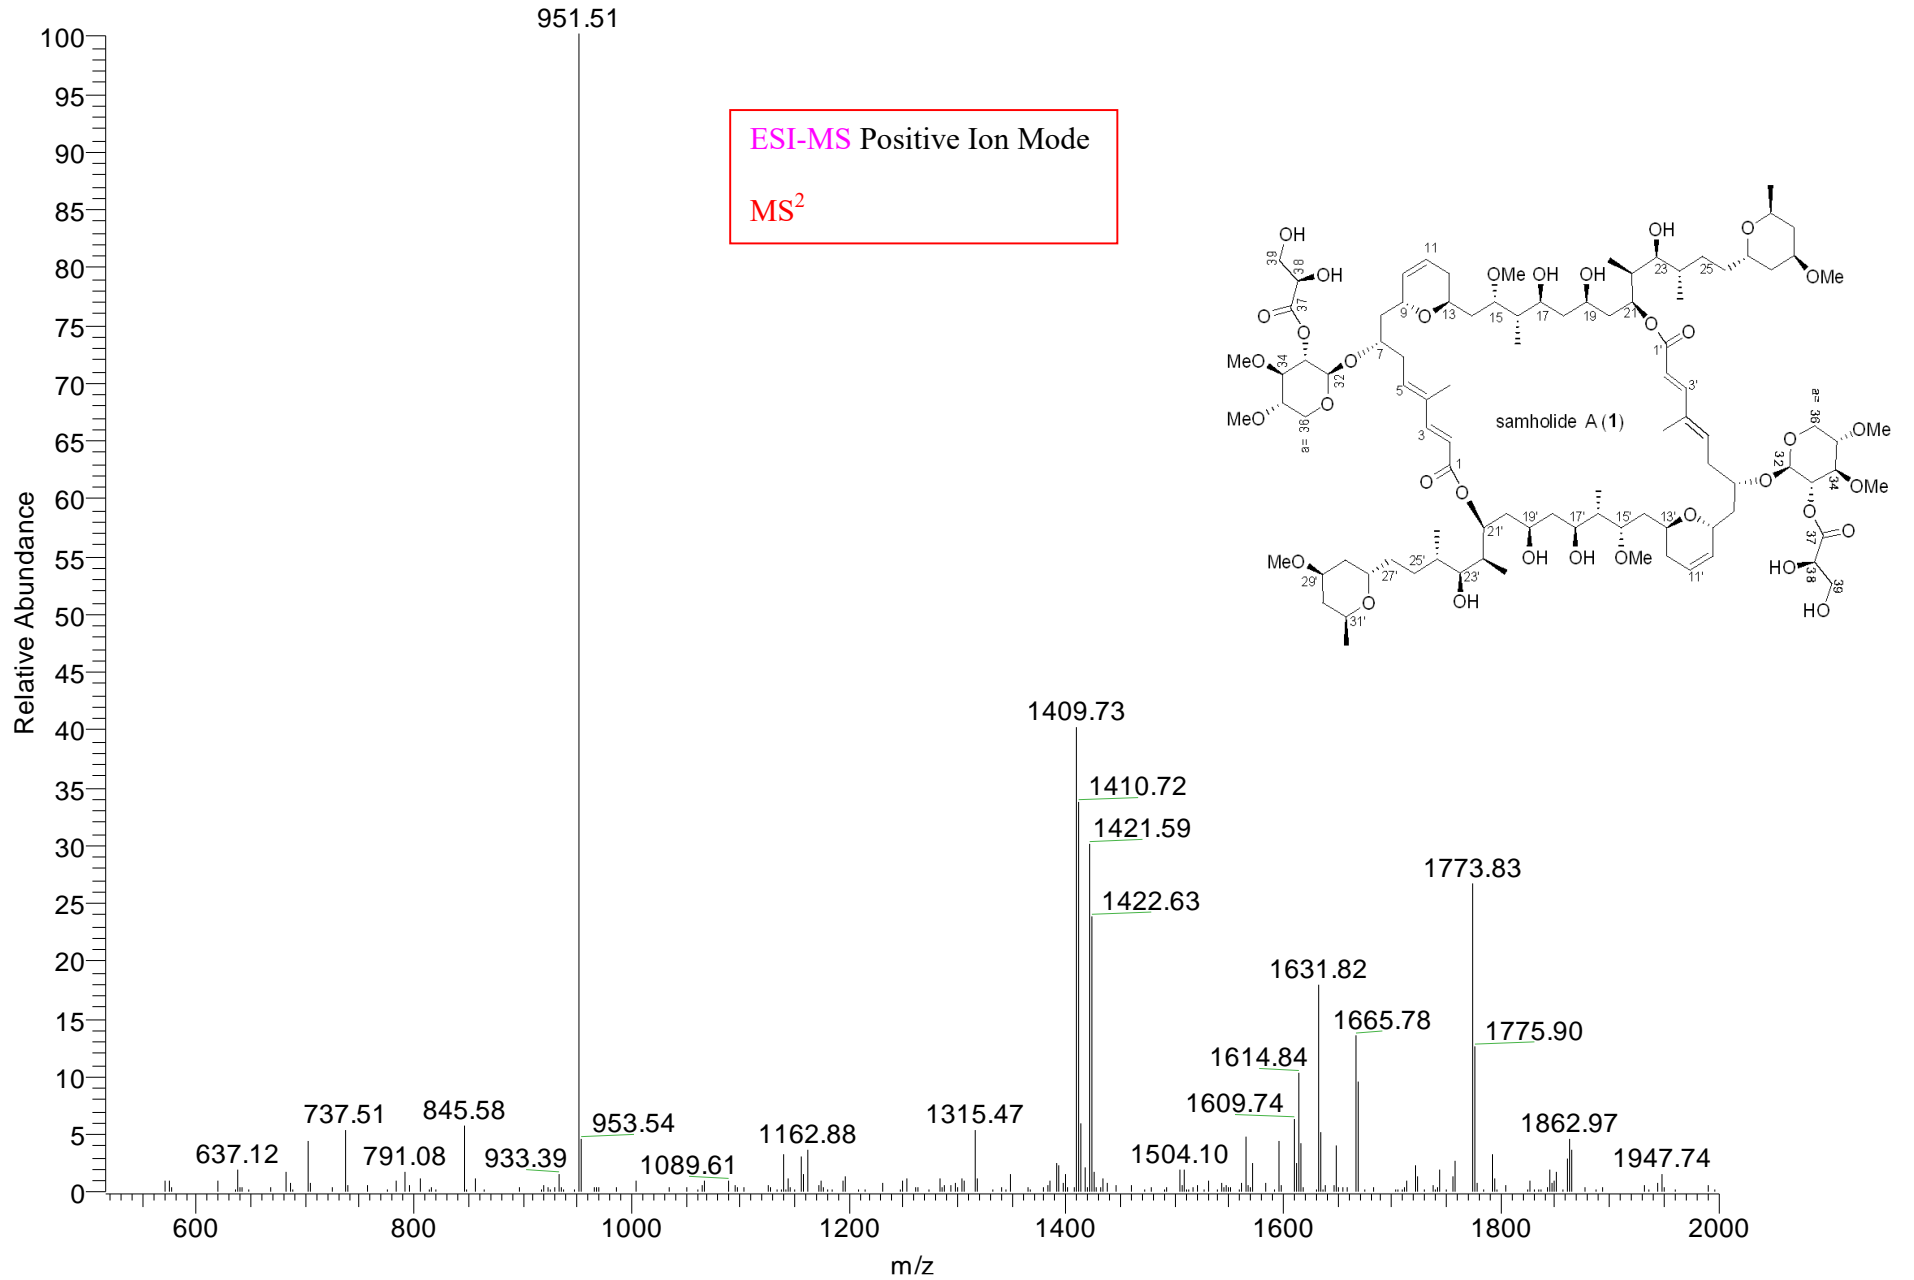

Figure S2 The ESI MS<sup>2</sup> spectrum of samholide A (1)

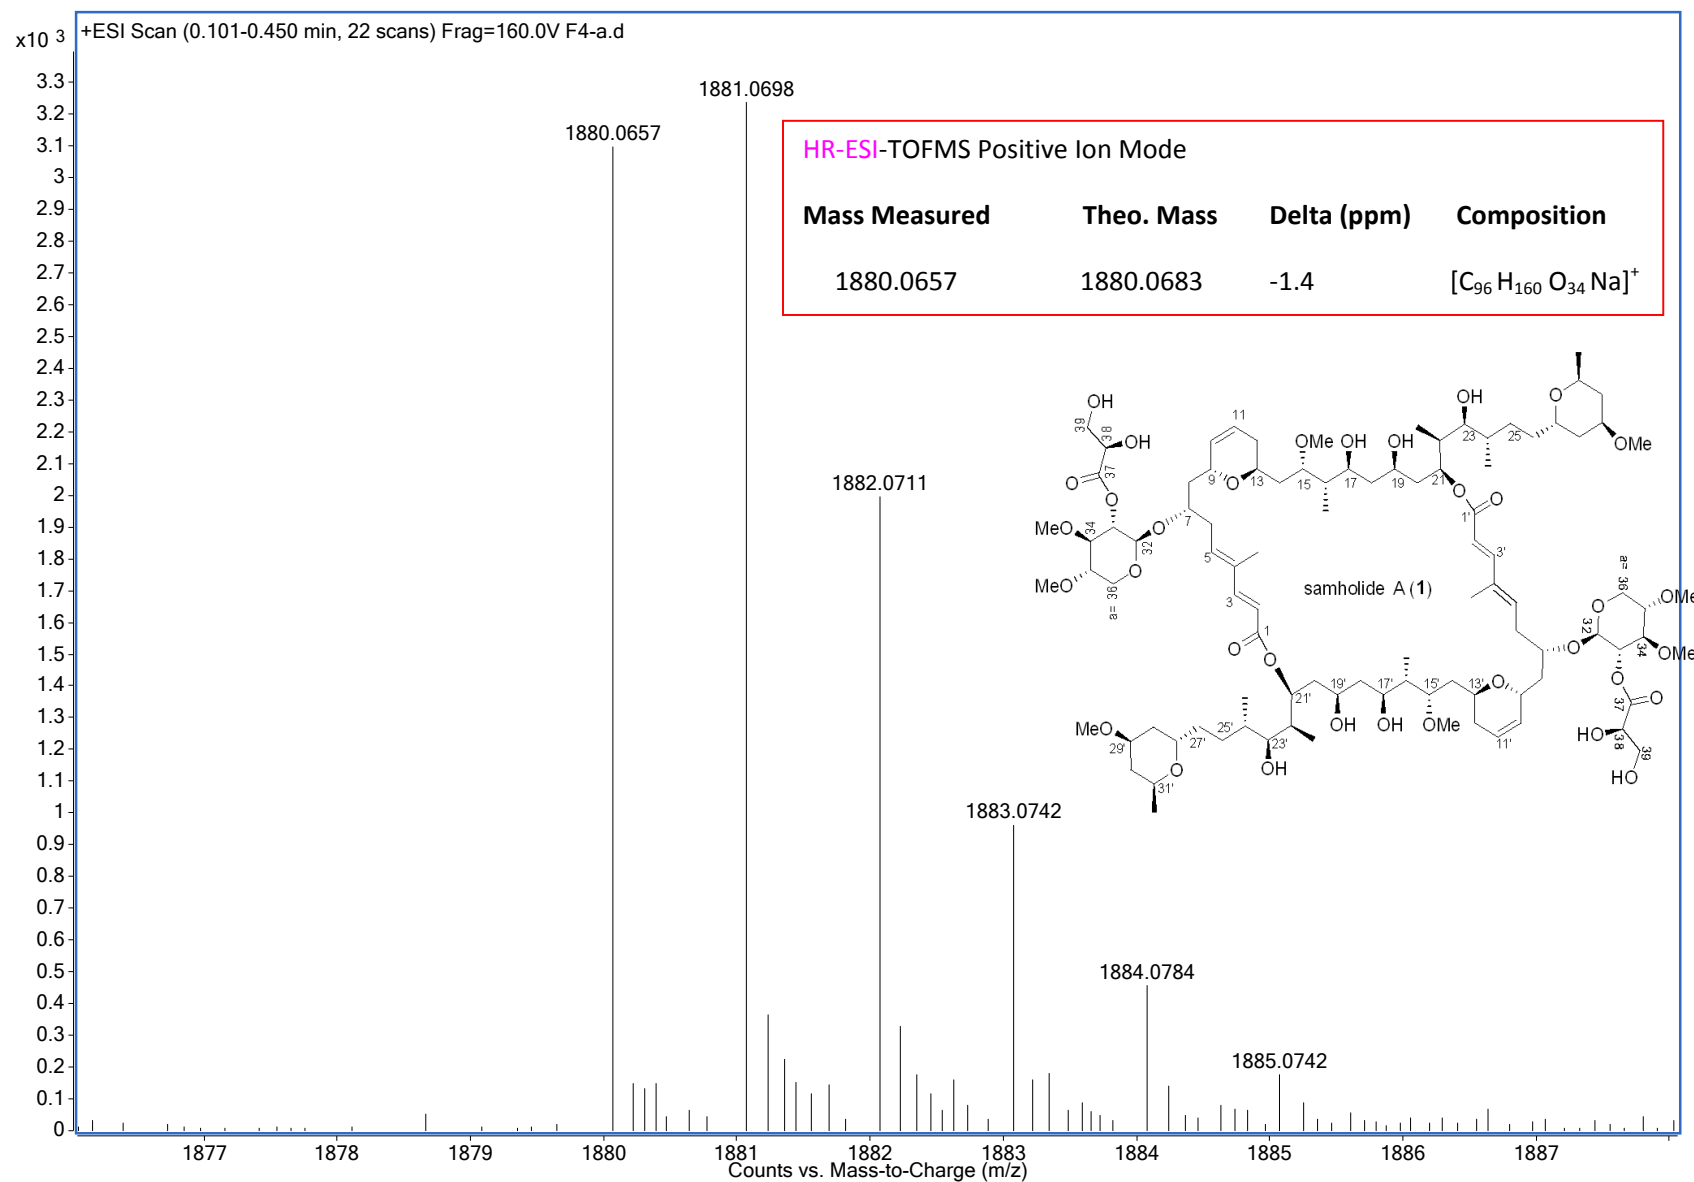

Figure S3 The positive HRESIMS spectrum of samholide A (1)

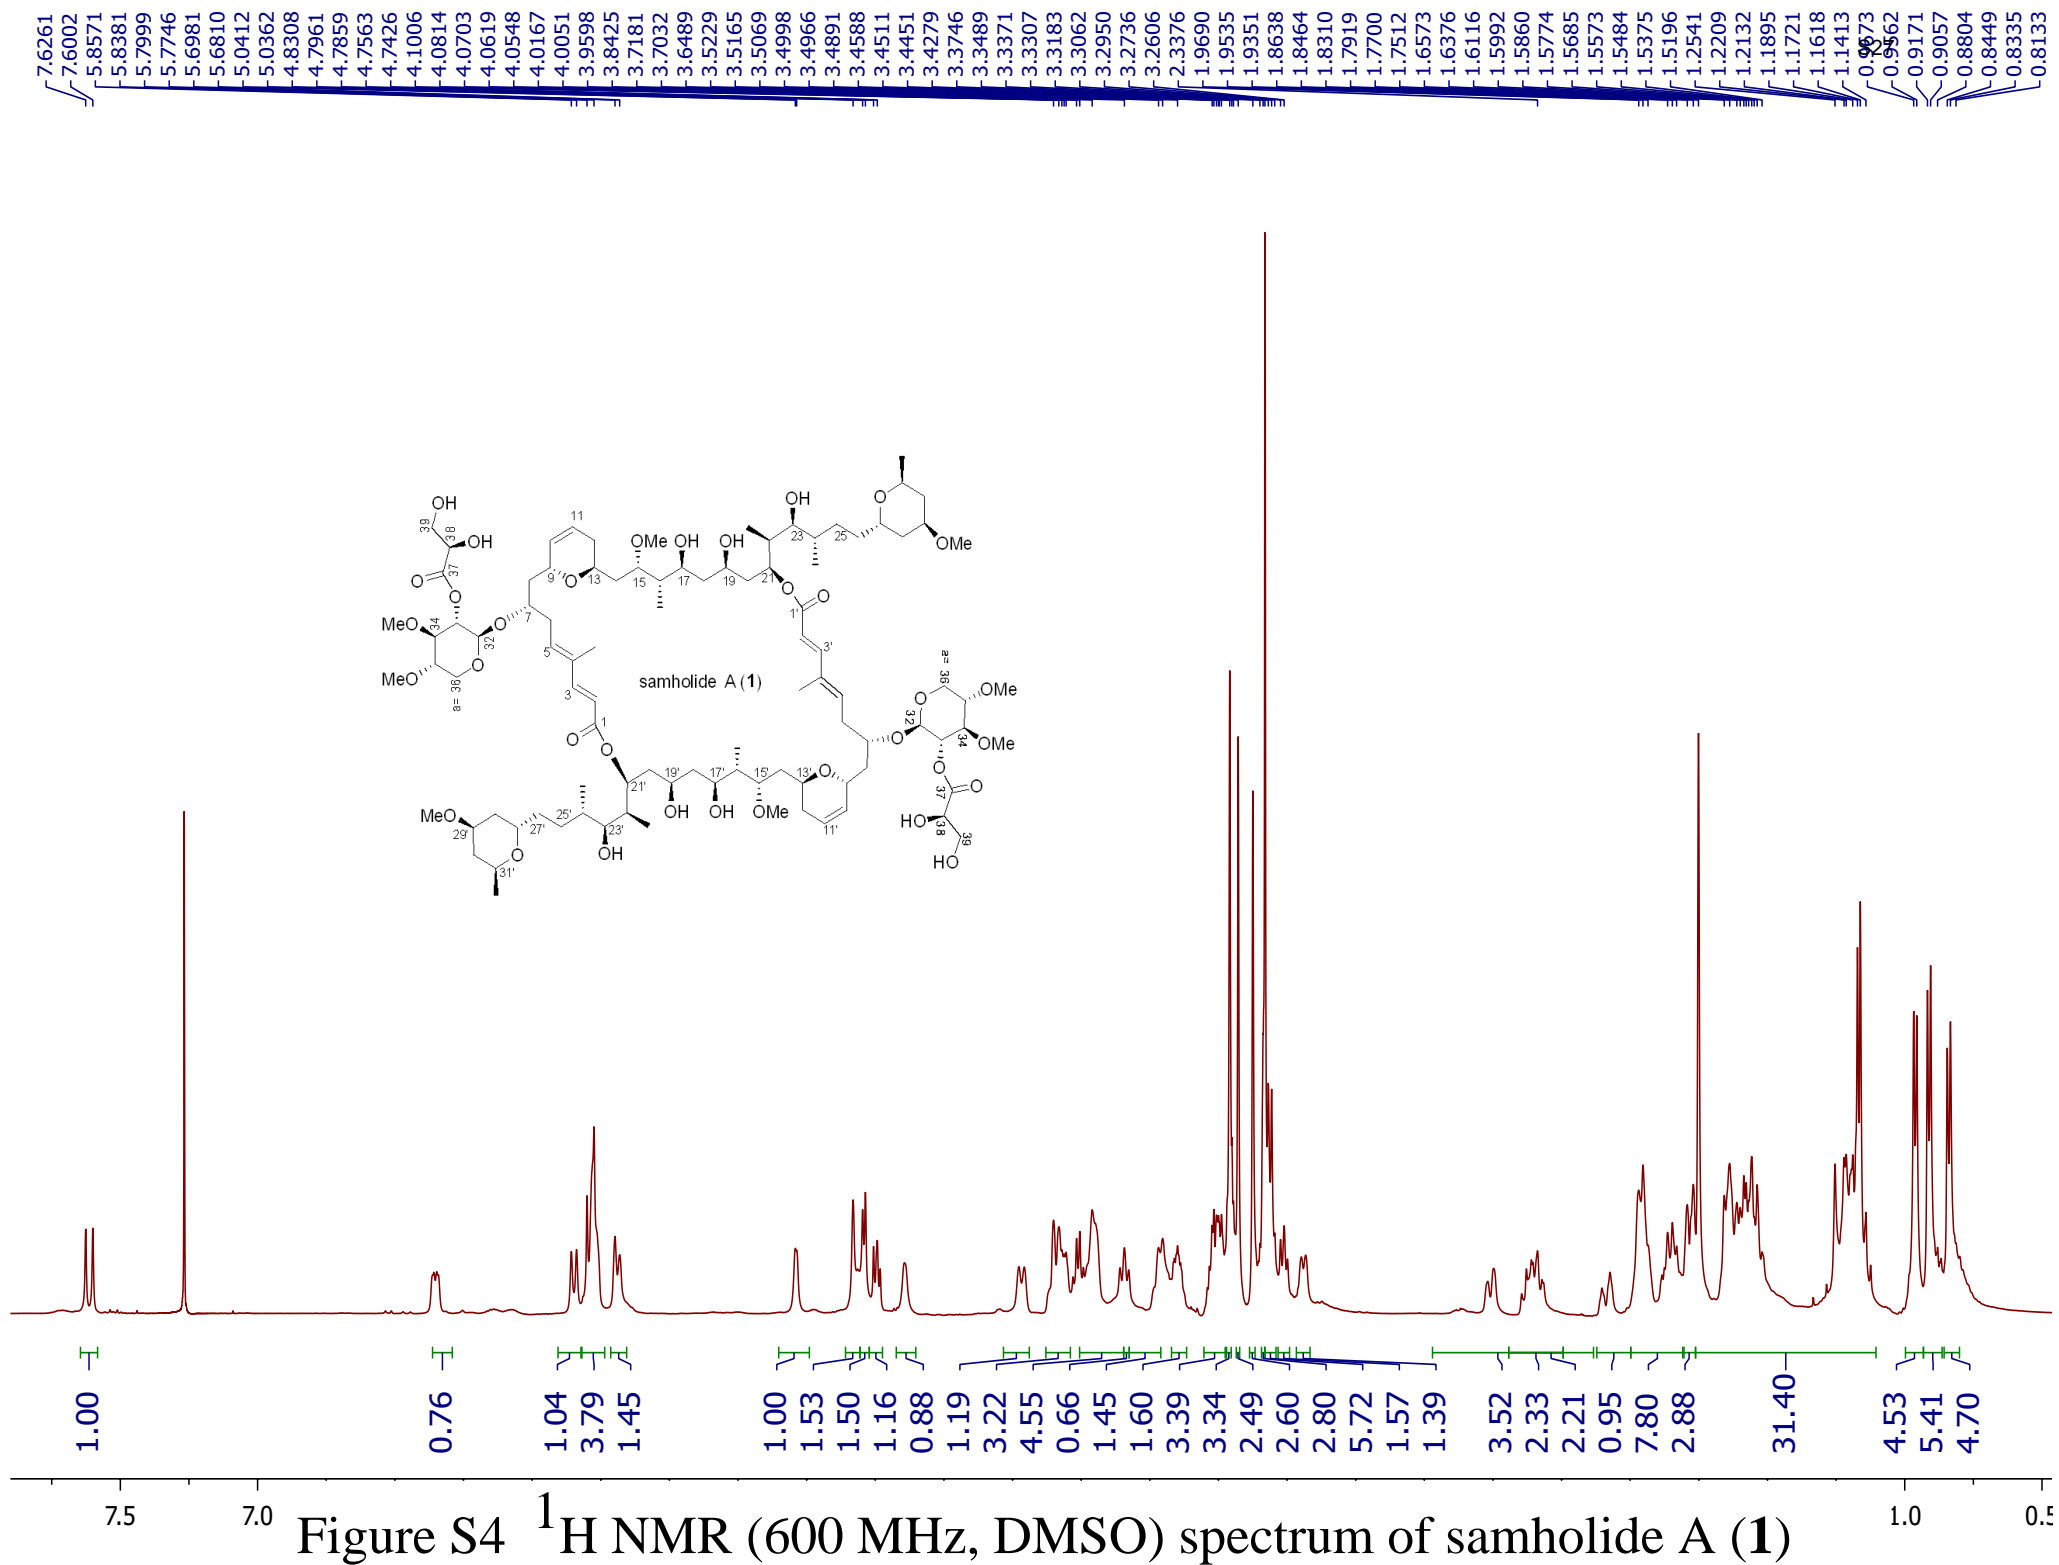

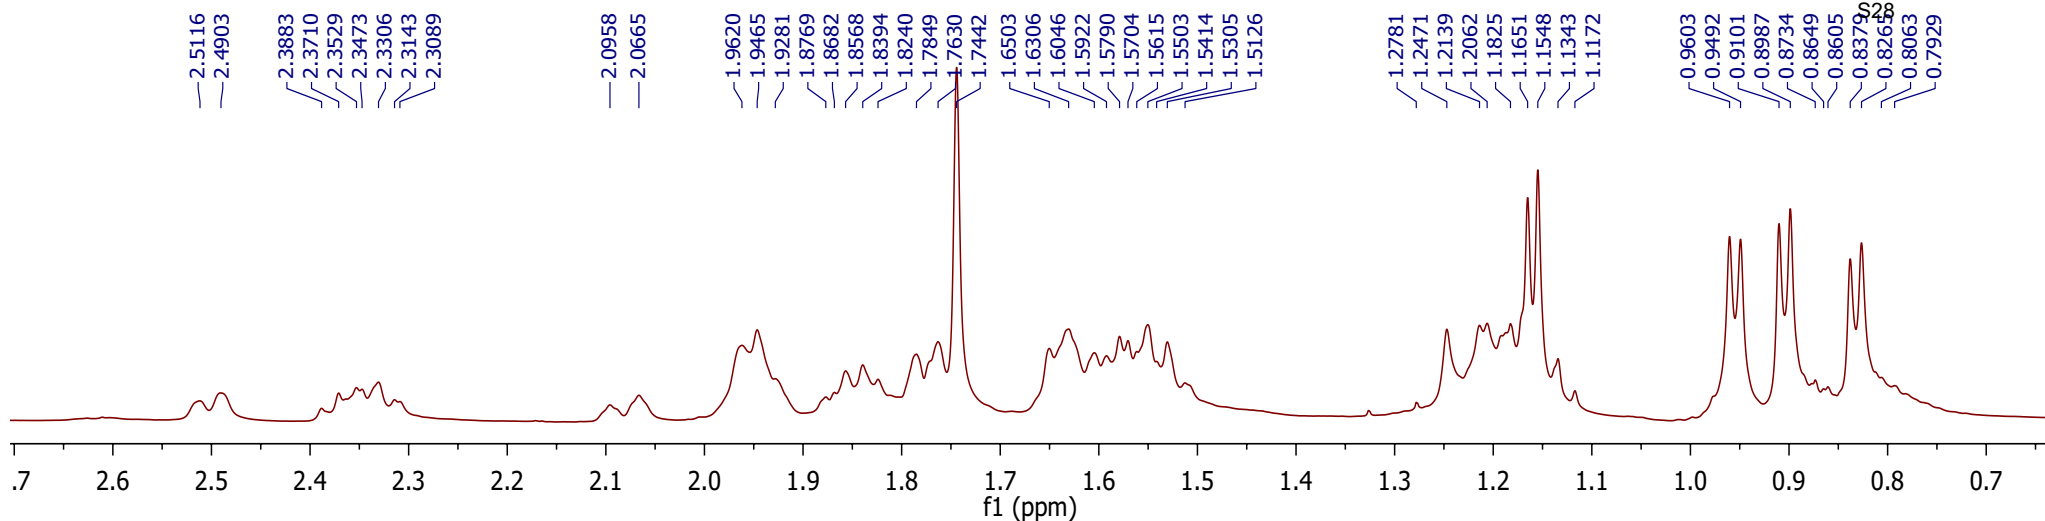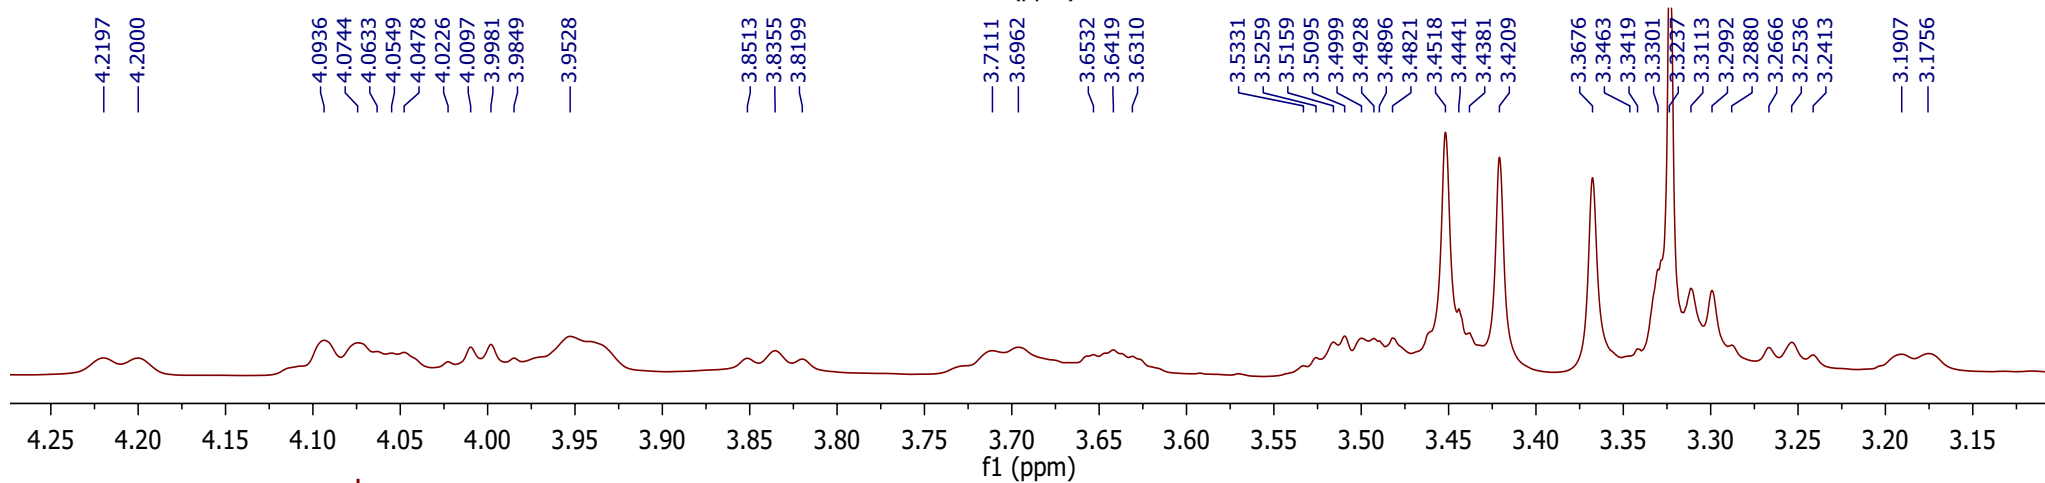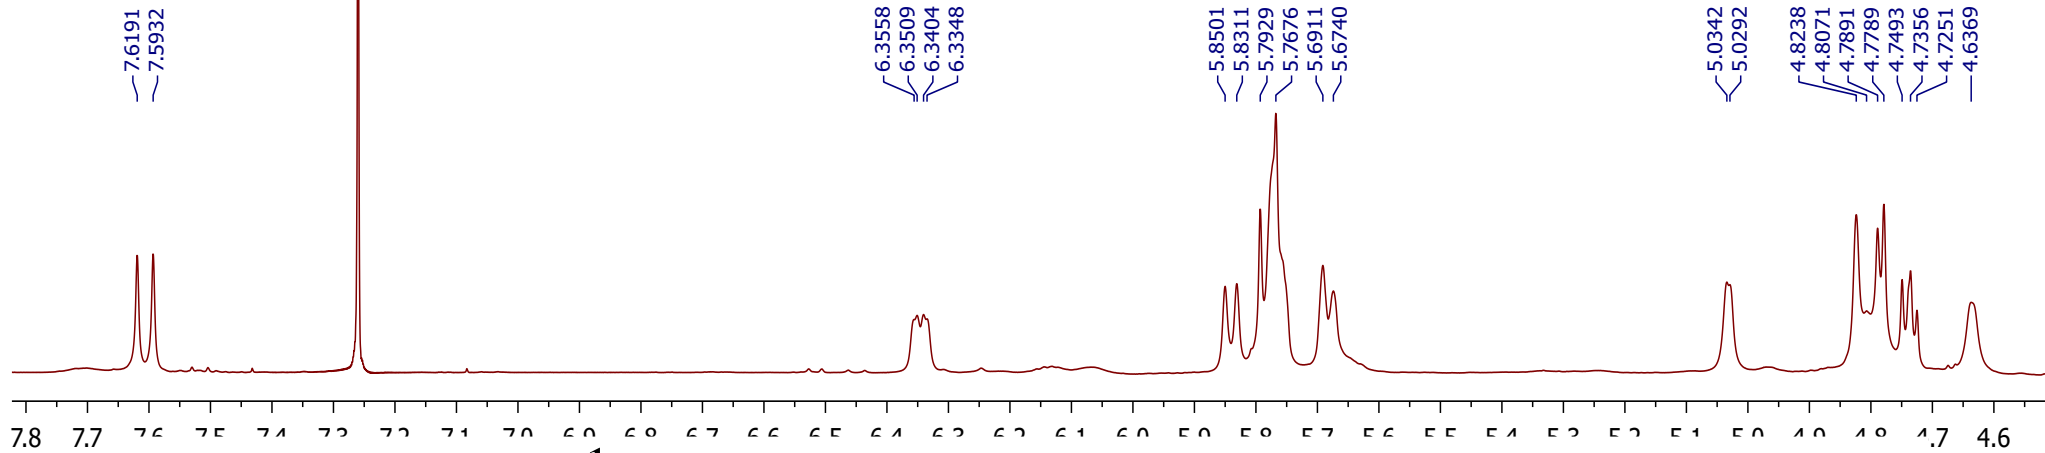

Figure S5 Amplified  $^1\text{H}$  NMR (600 MHz, DMSO) spectrum of samholide A (**1**)

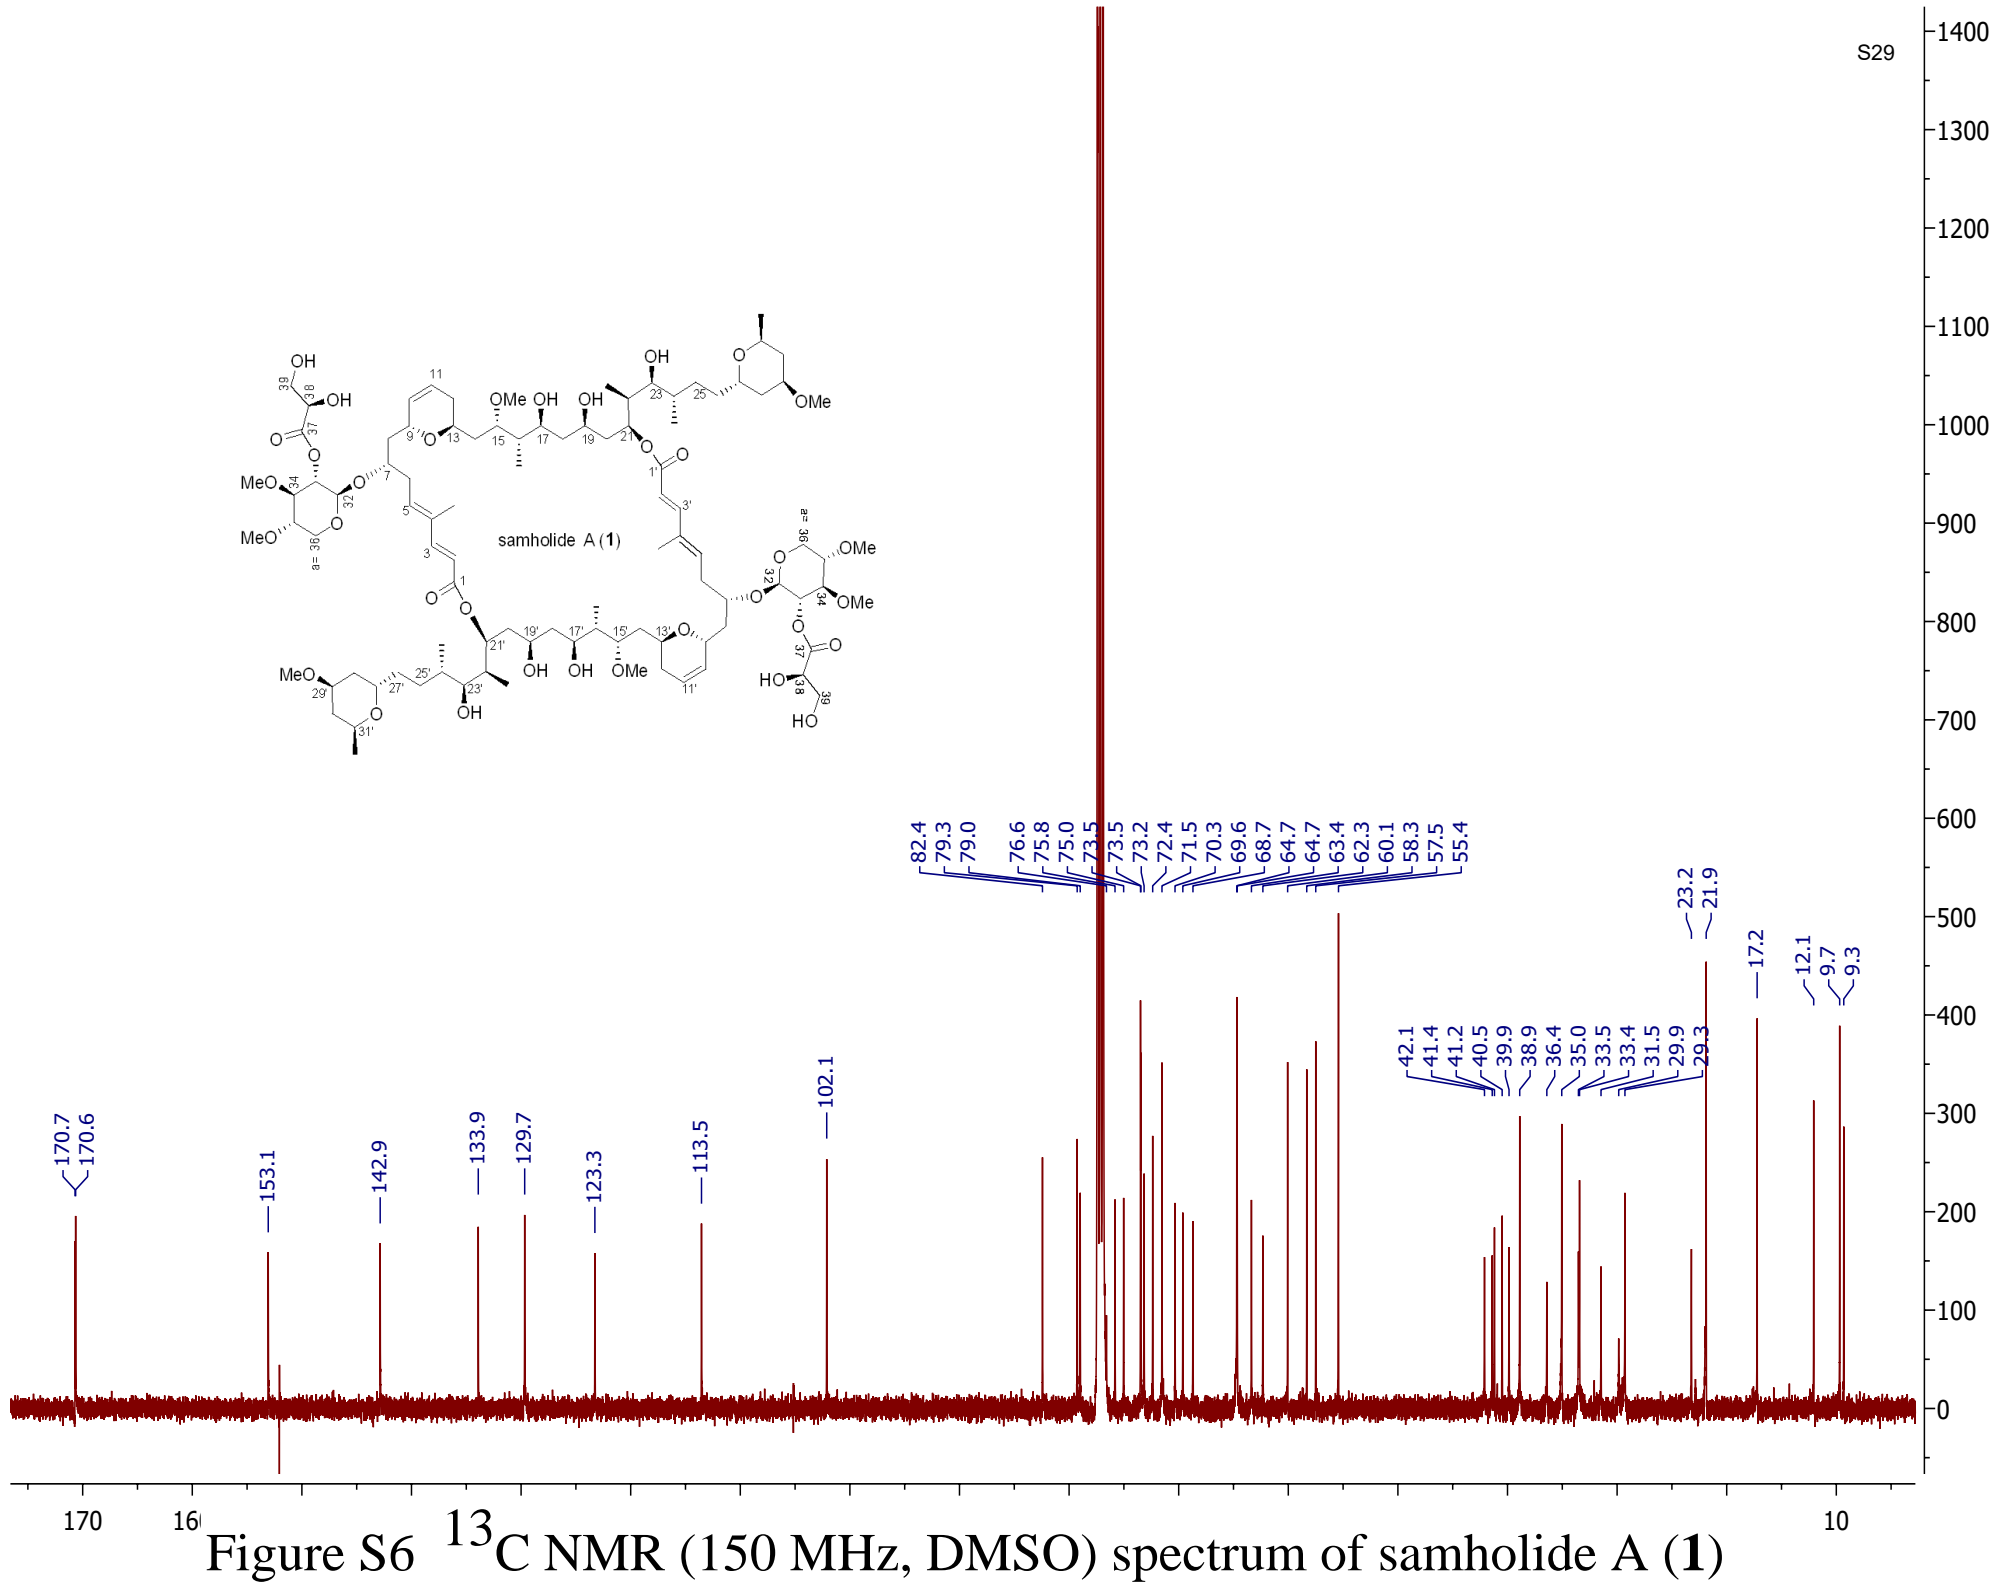

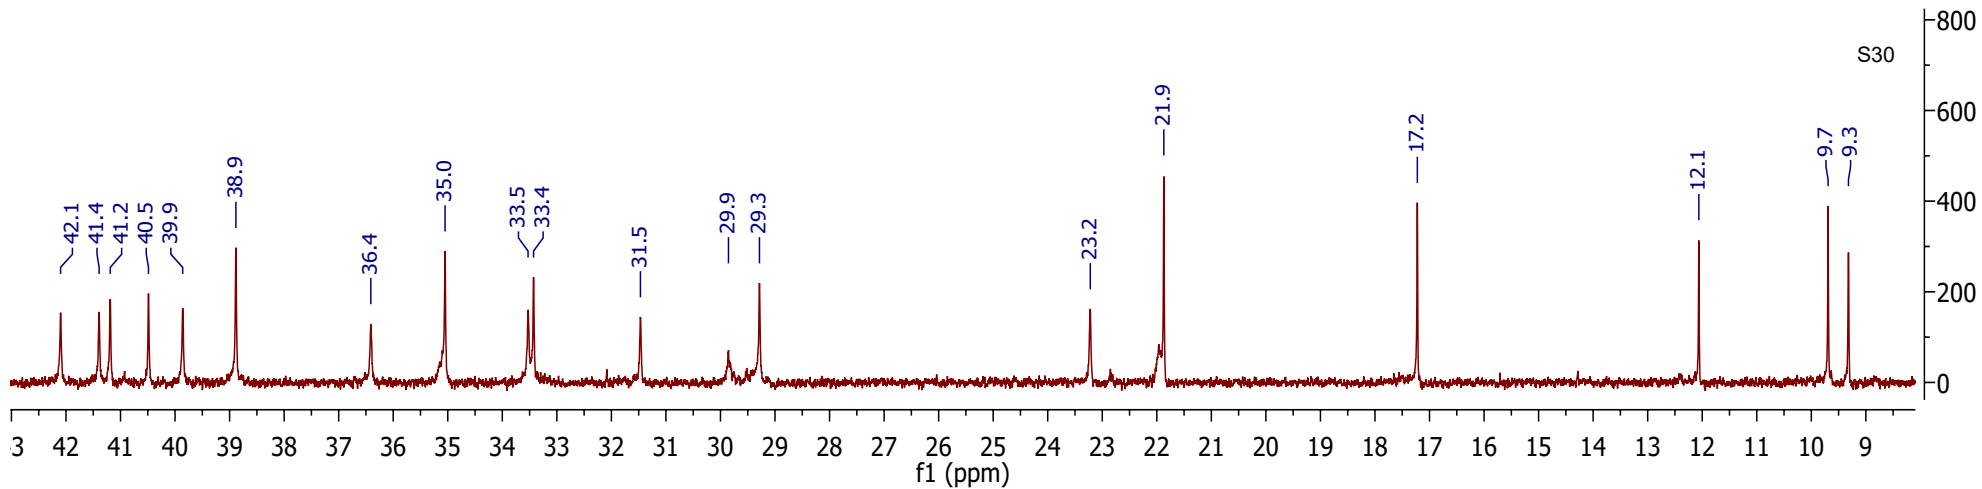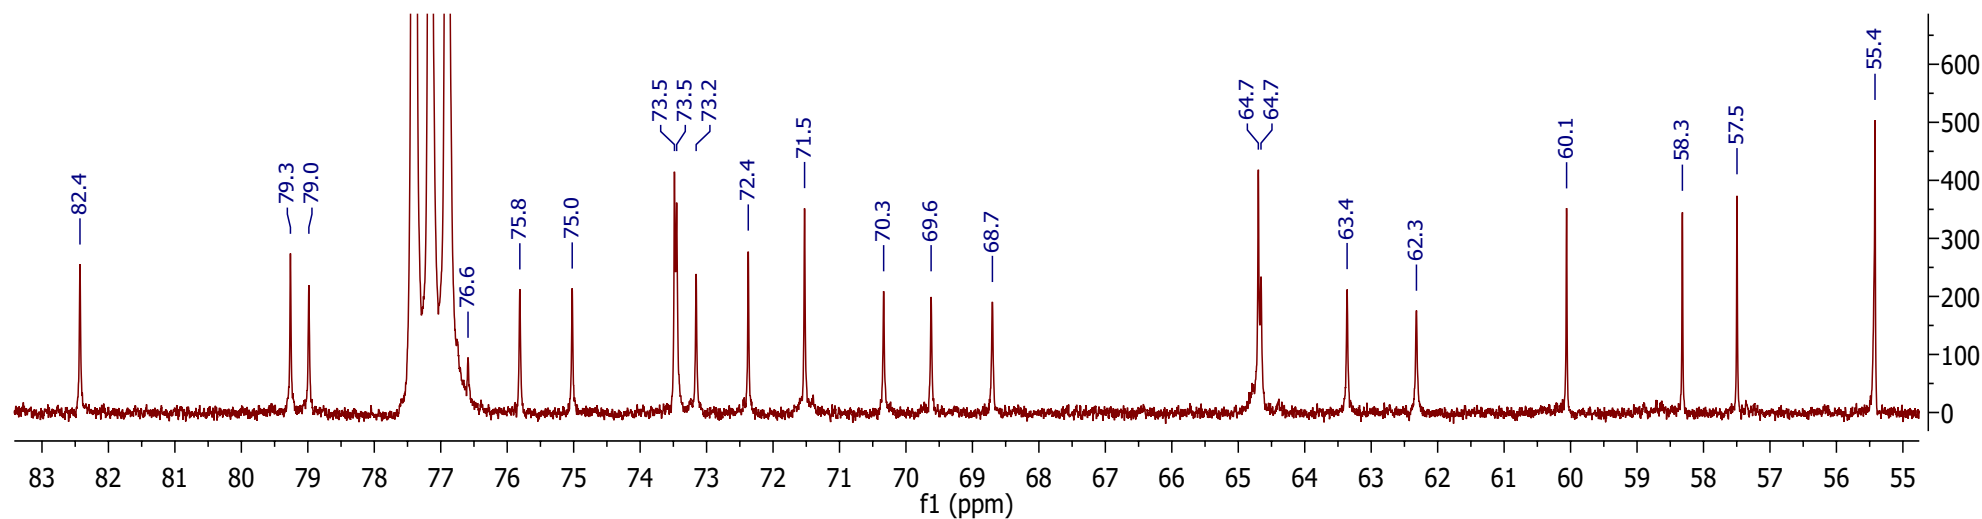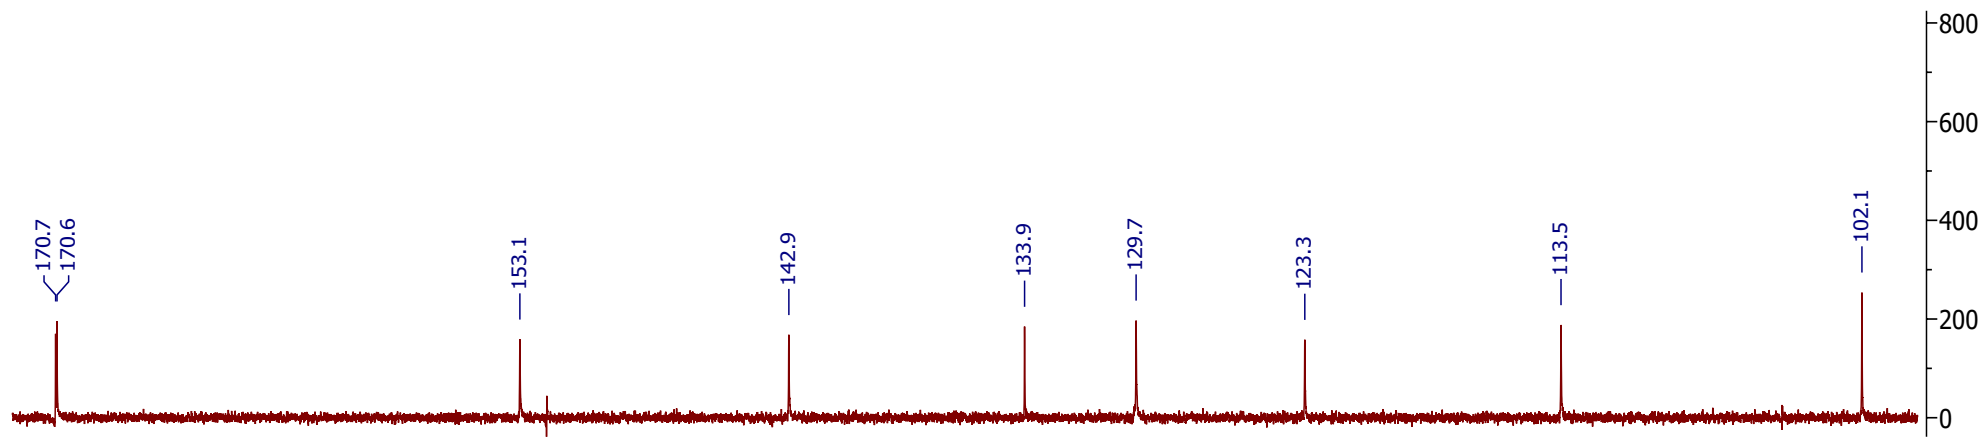

$^{13}\text{C}$  Figure S7 Amplified  $^{13}\text{C}$  NMR (150 MHz, DMSO) spectrum of samholide A (1)

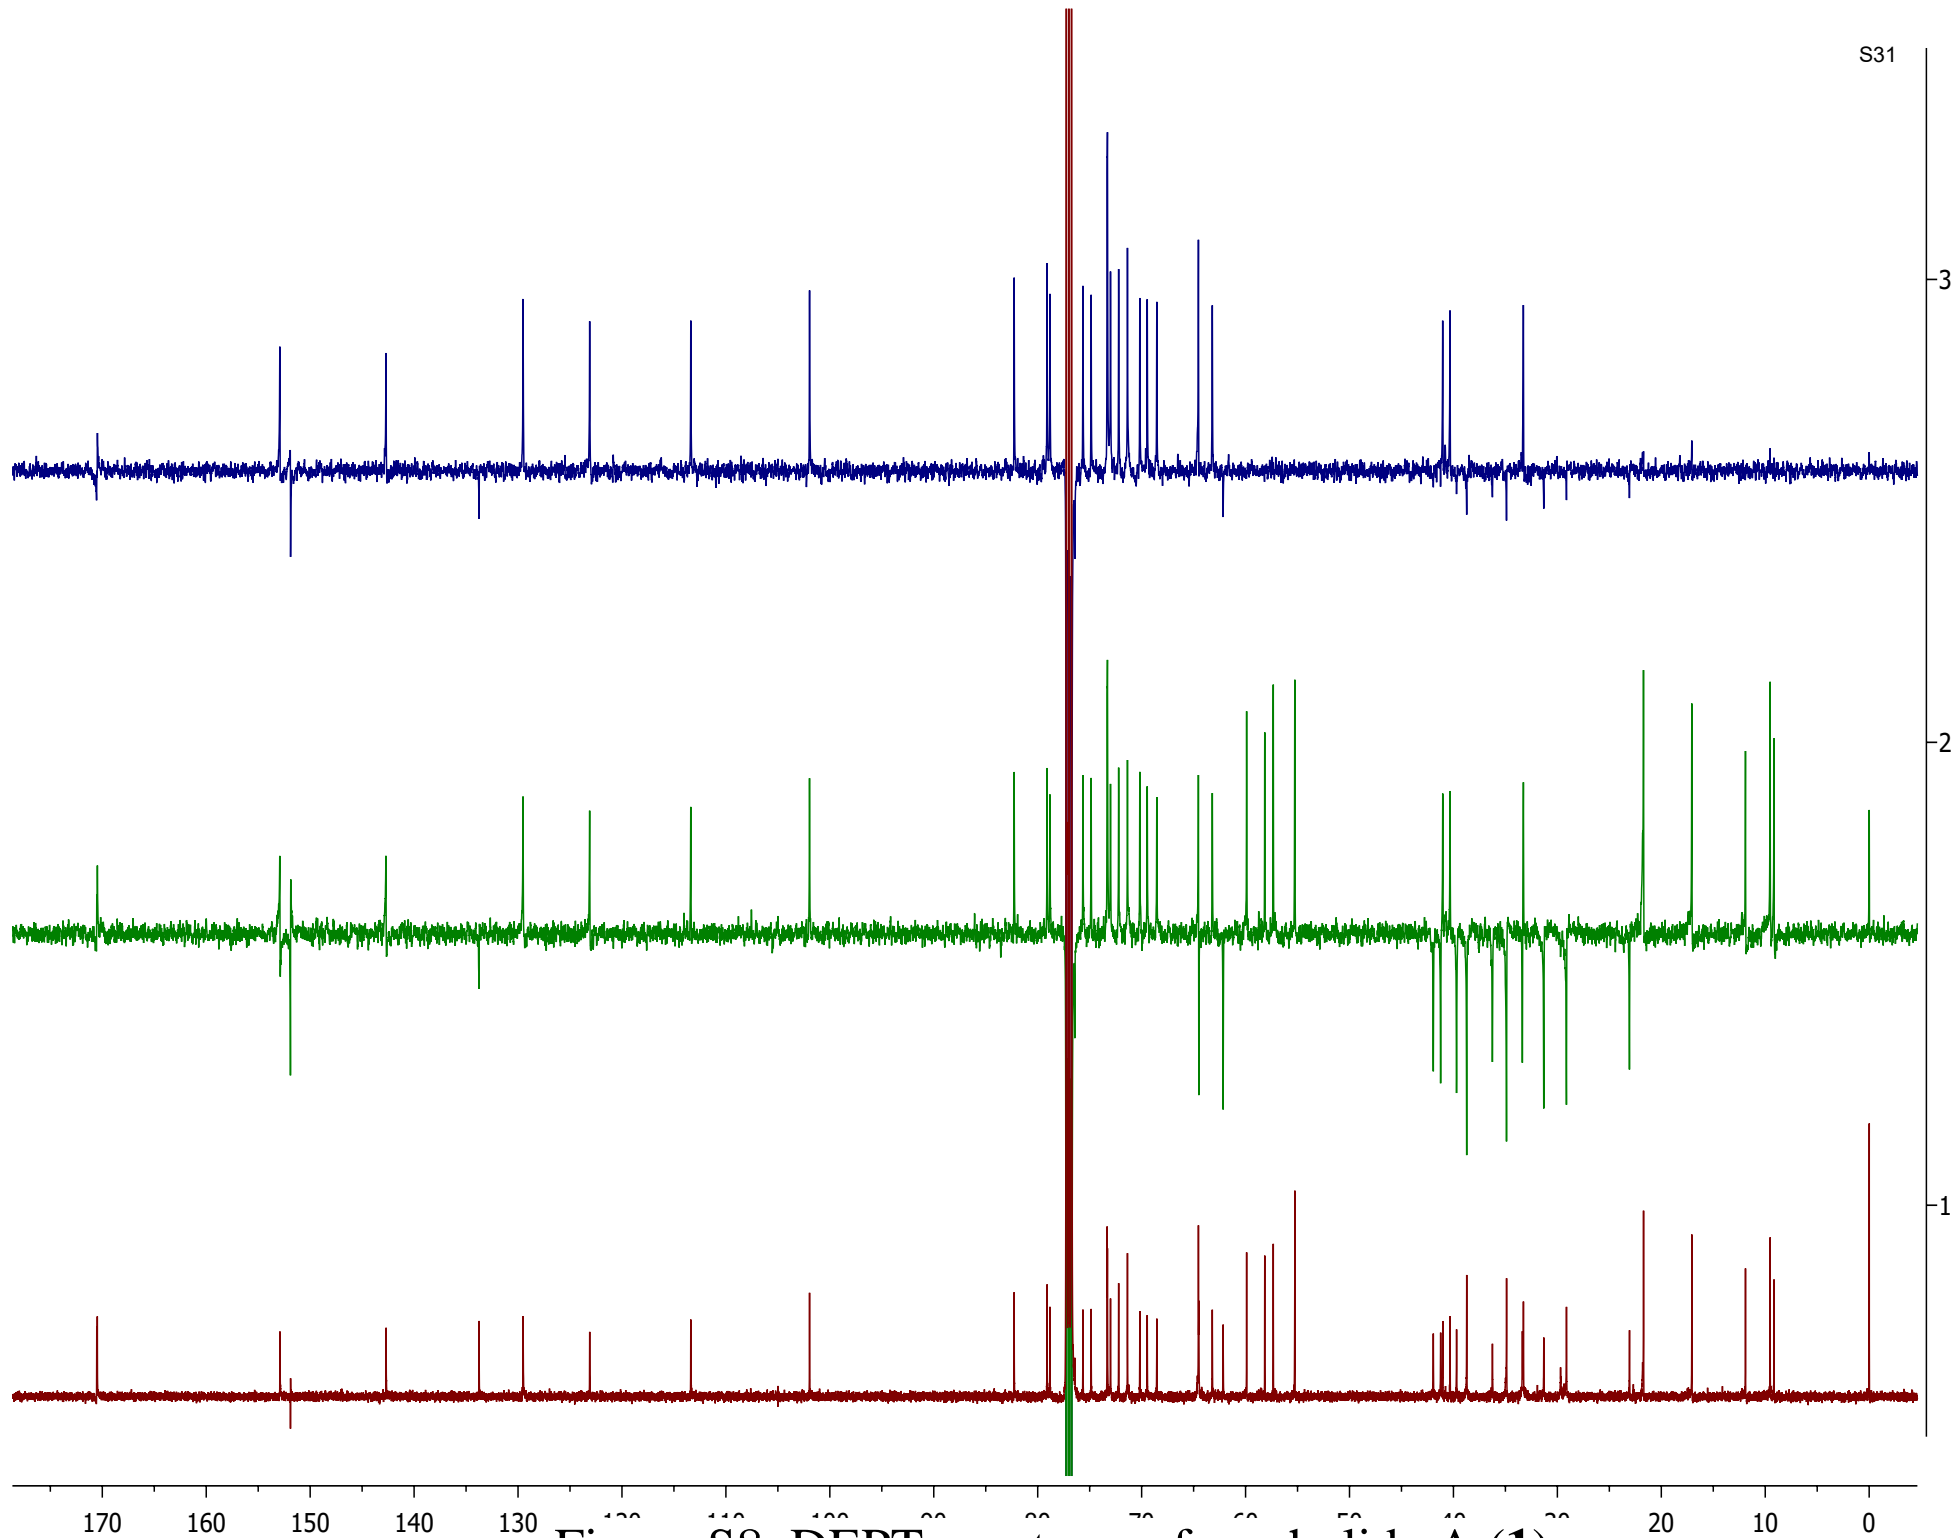

Figure S8 DEPT spectrum of samholide A (1)

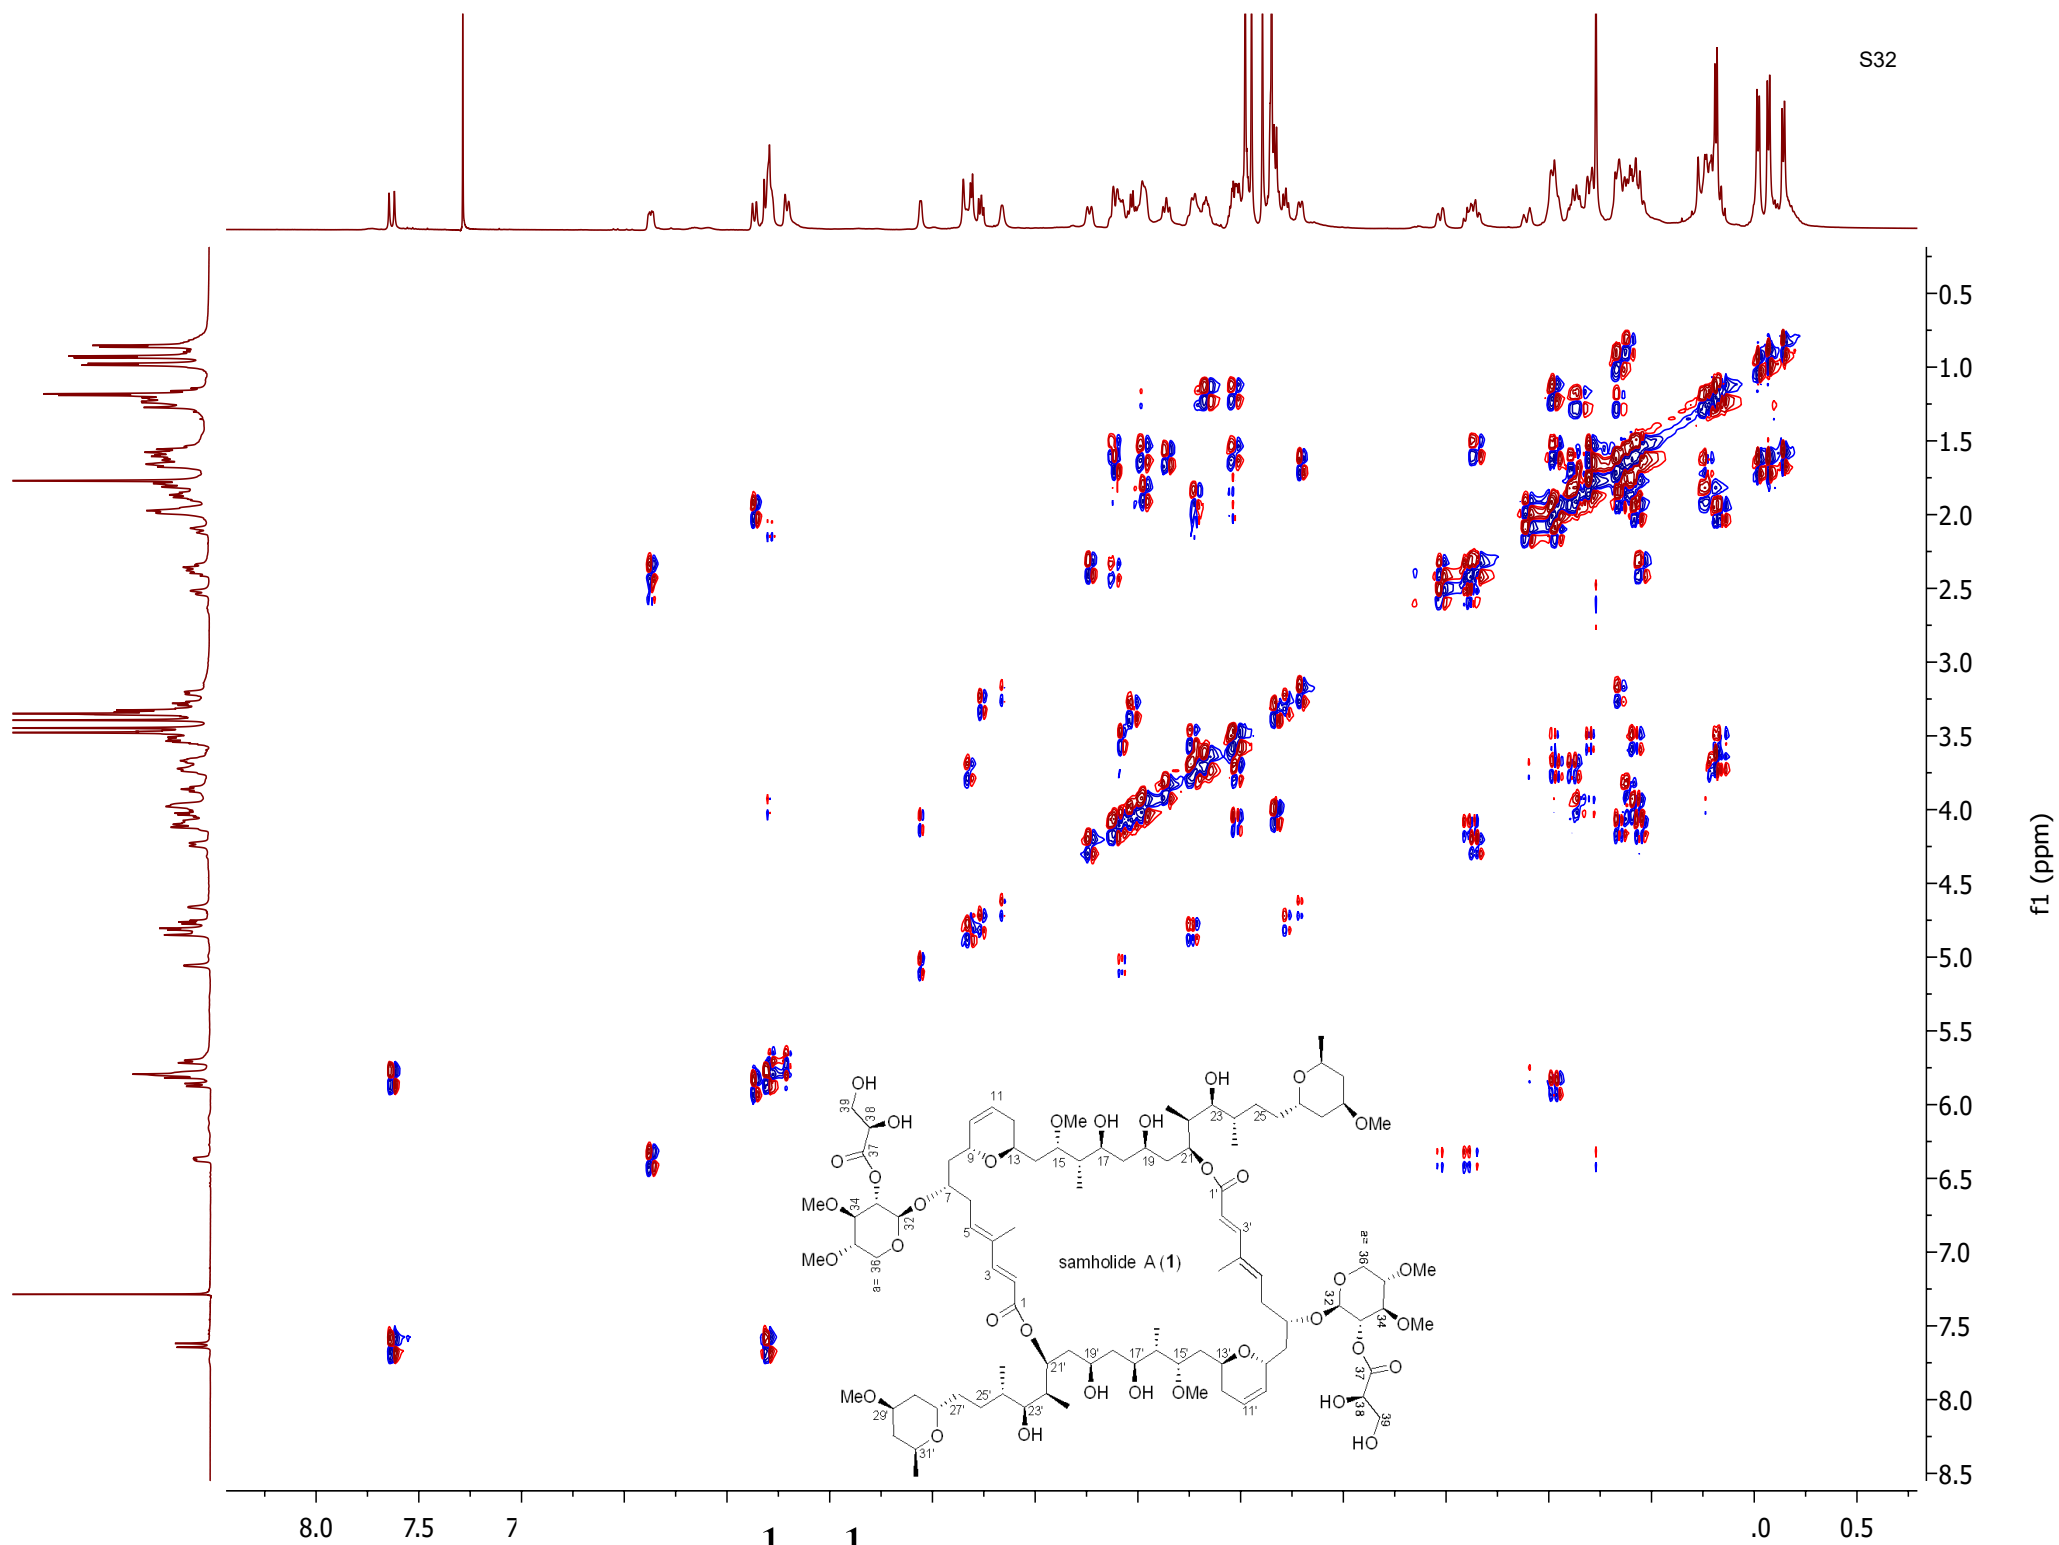

Figure S9  $^1\text{H}$ - $^1\text{H}$  COSY spectrum of samholide A (1)



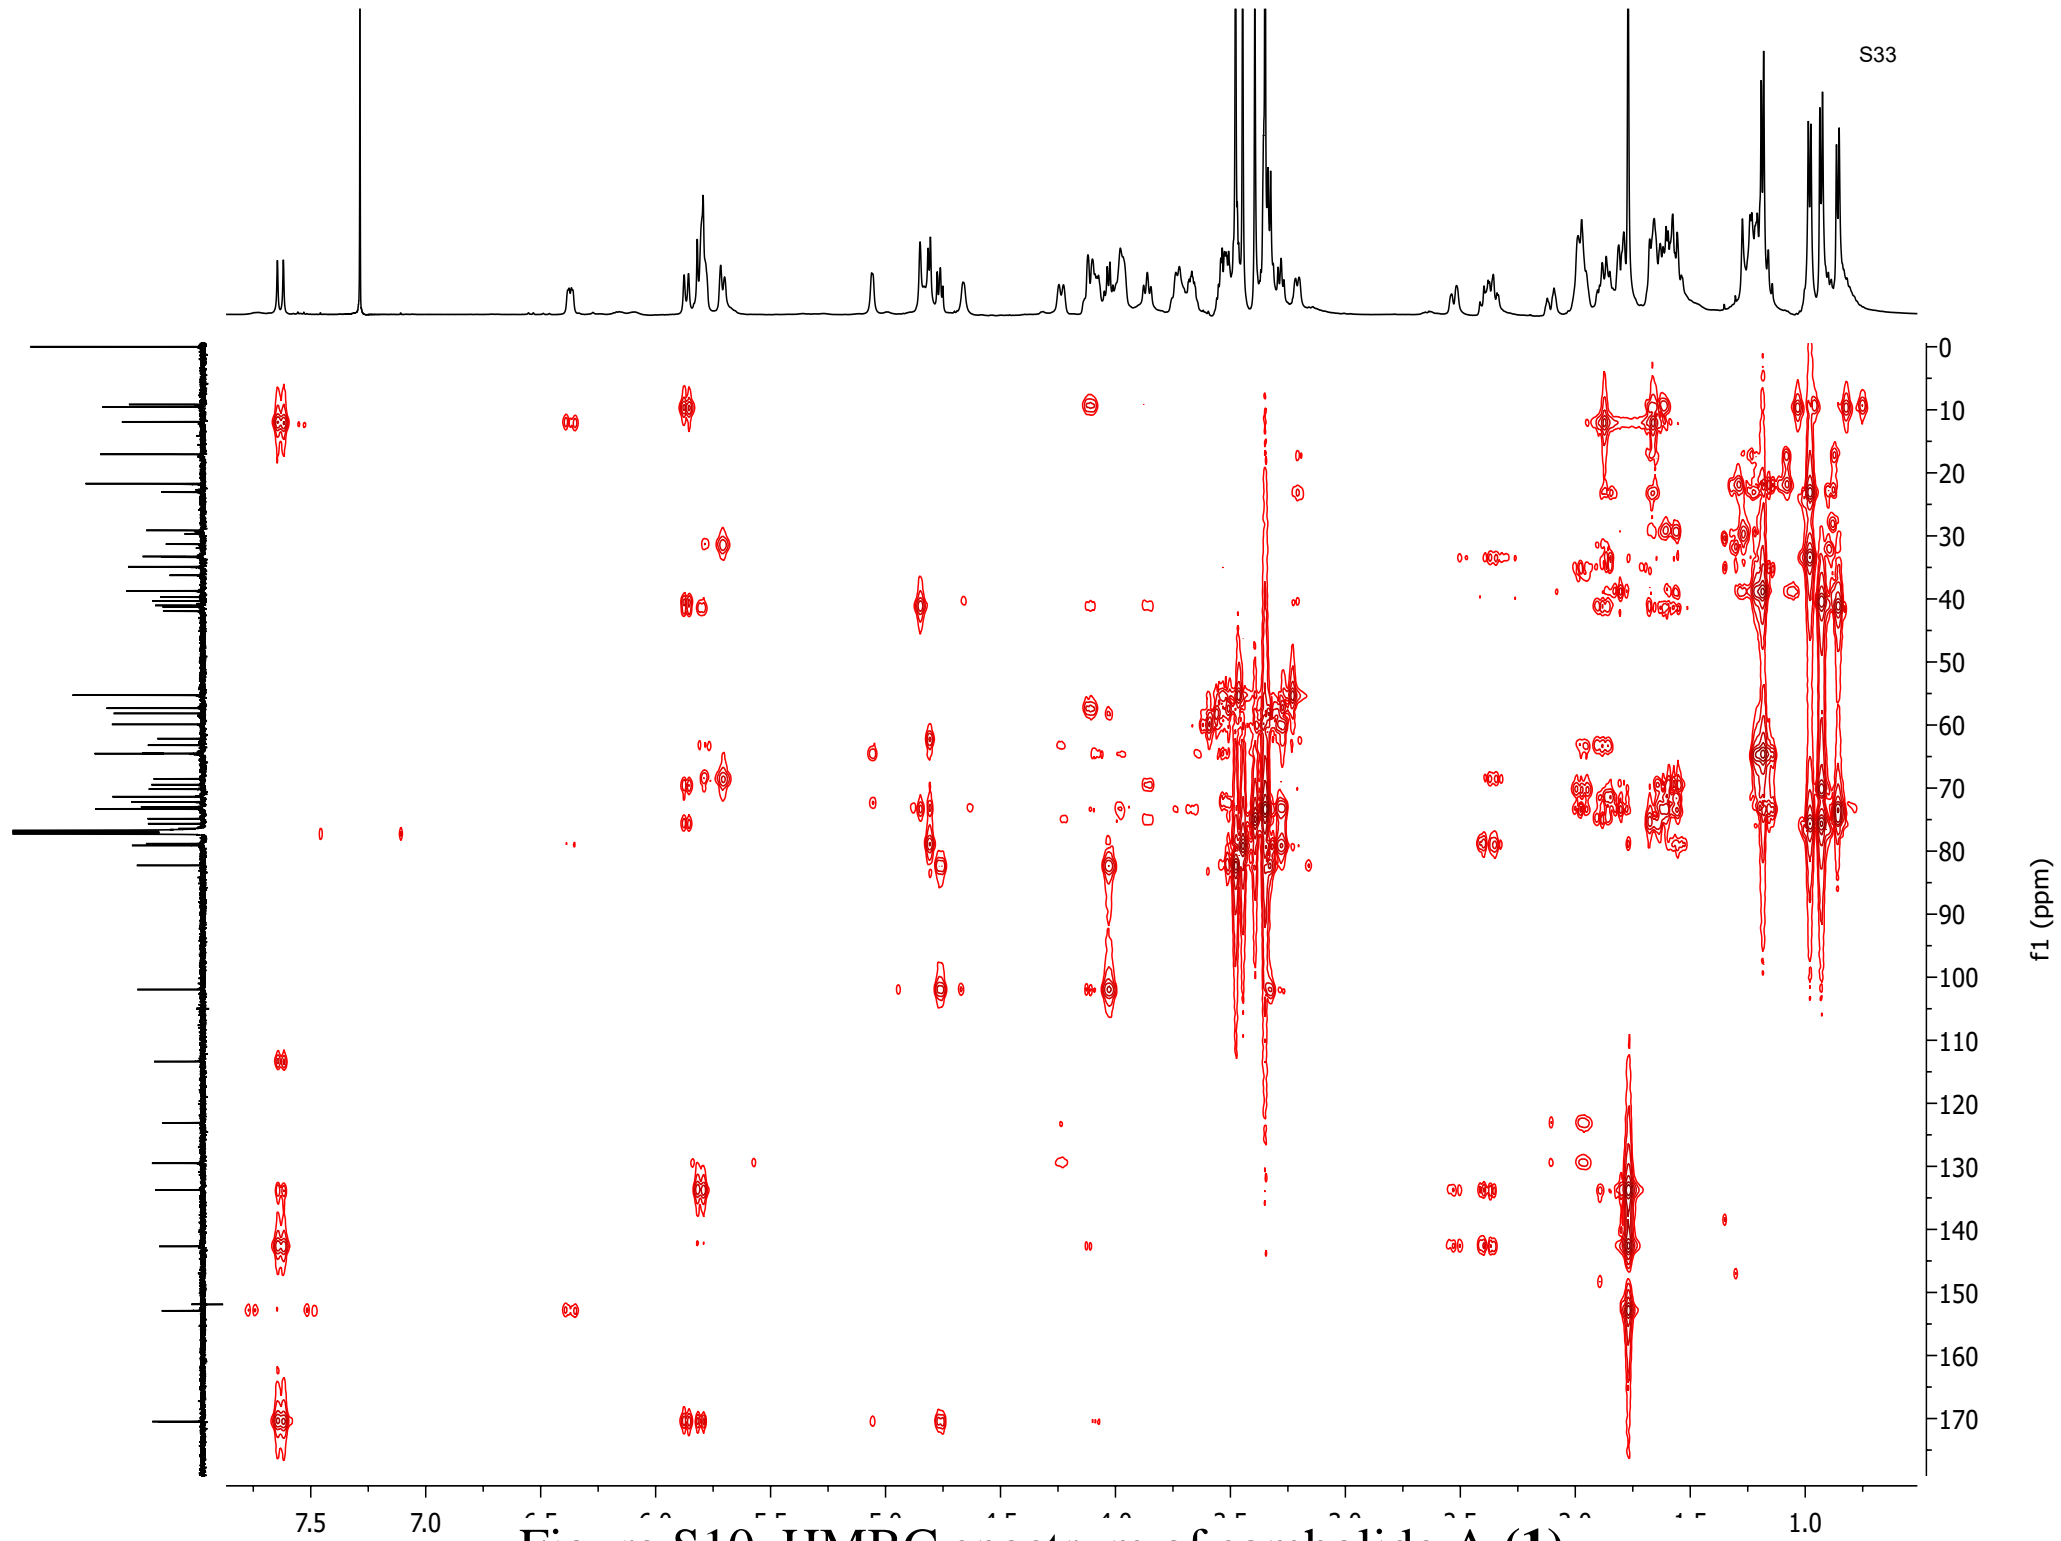

Figure S10 HMBC spectrum of samholide A (**1**)

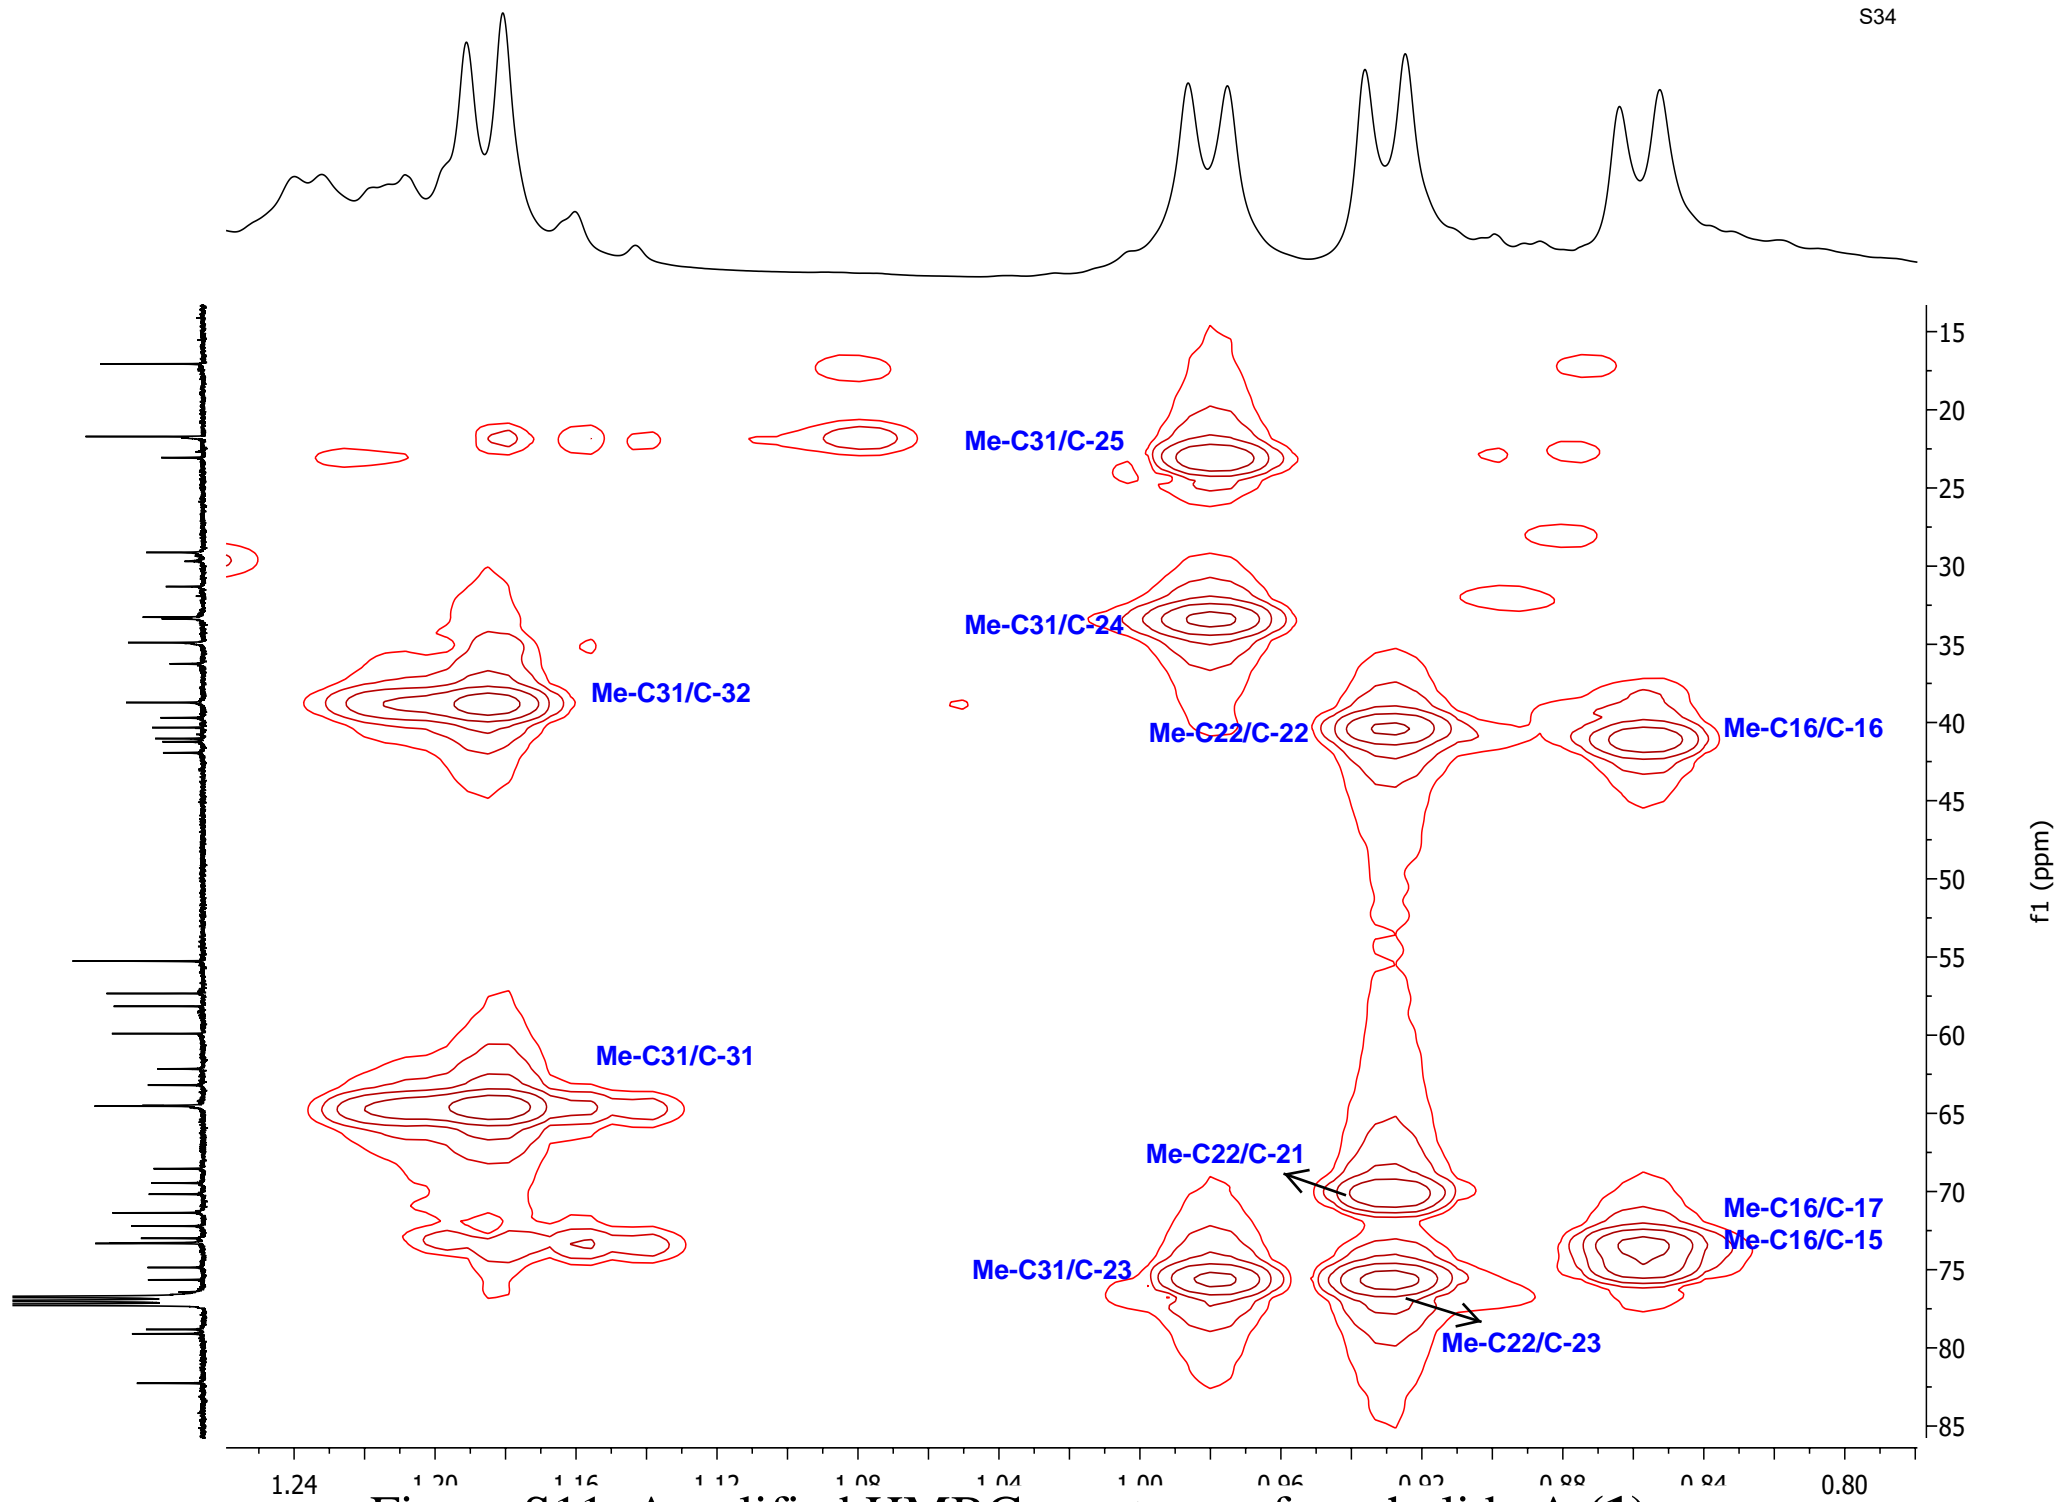

Figure S11 Amplified HMBC spectrum of samholide A (1)

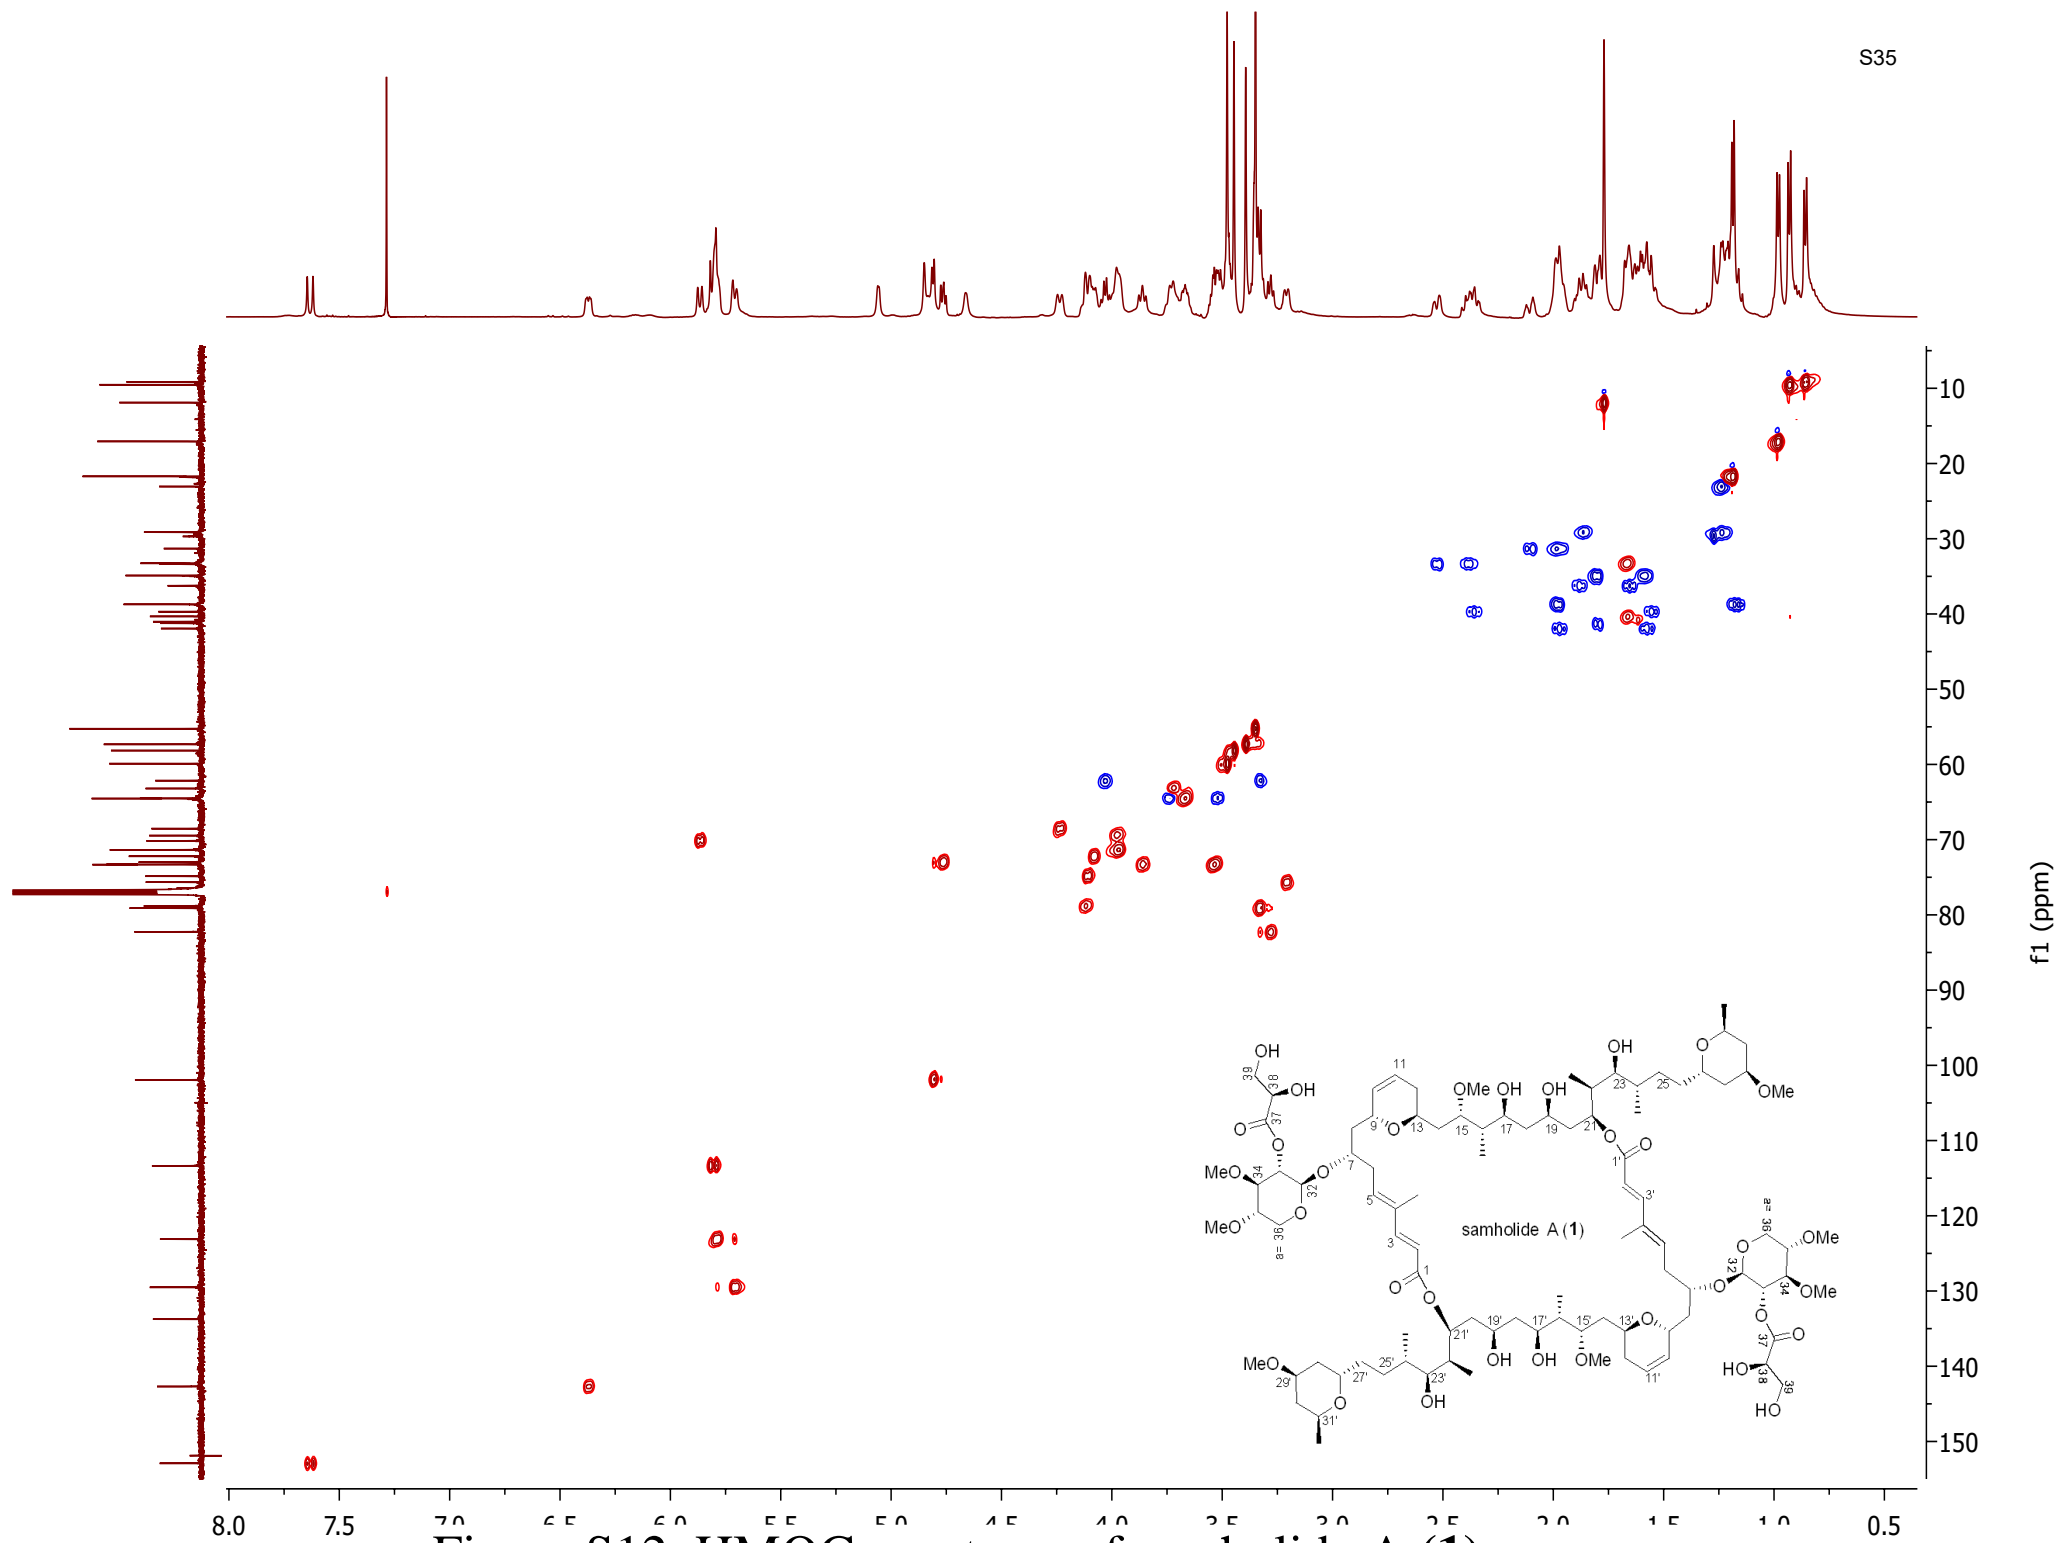

Figure S12 HMBC spectrum of samholide A (1)

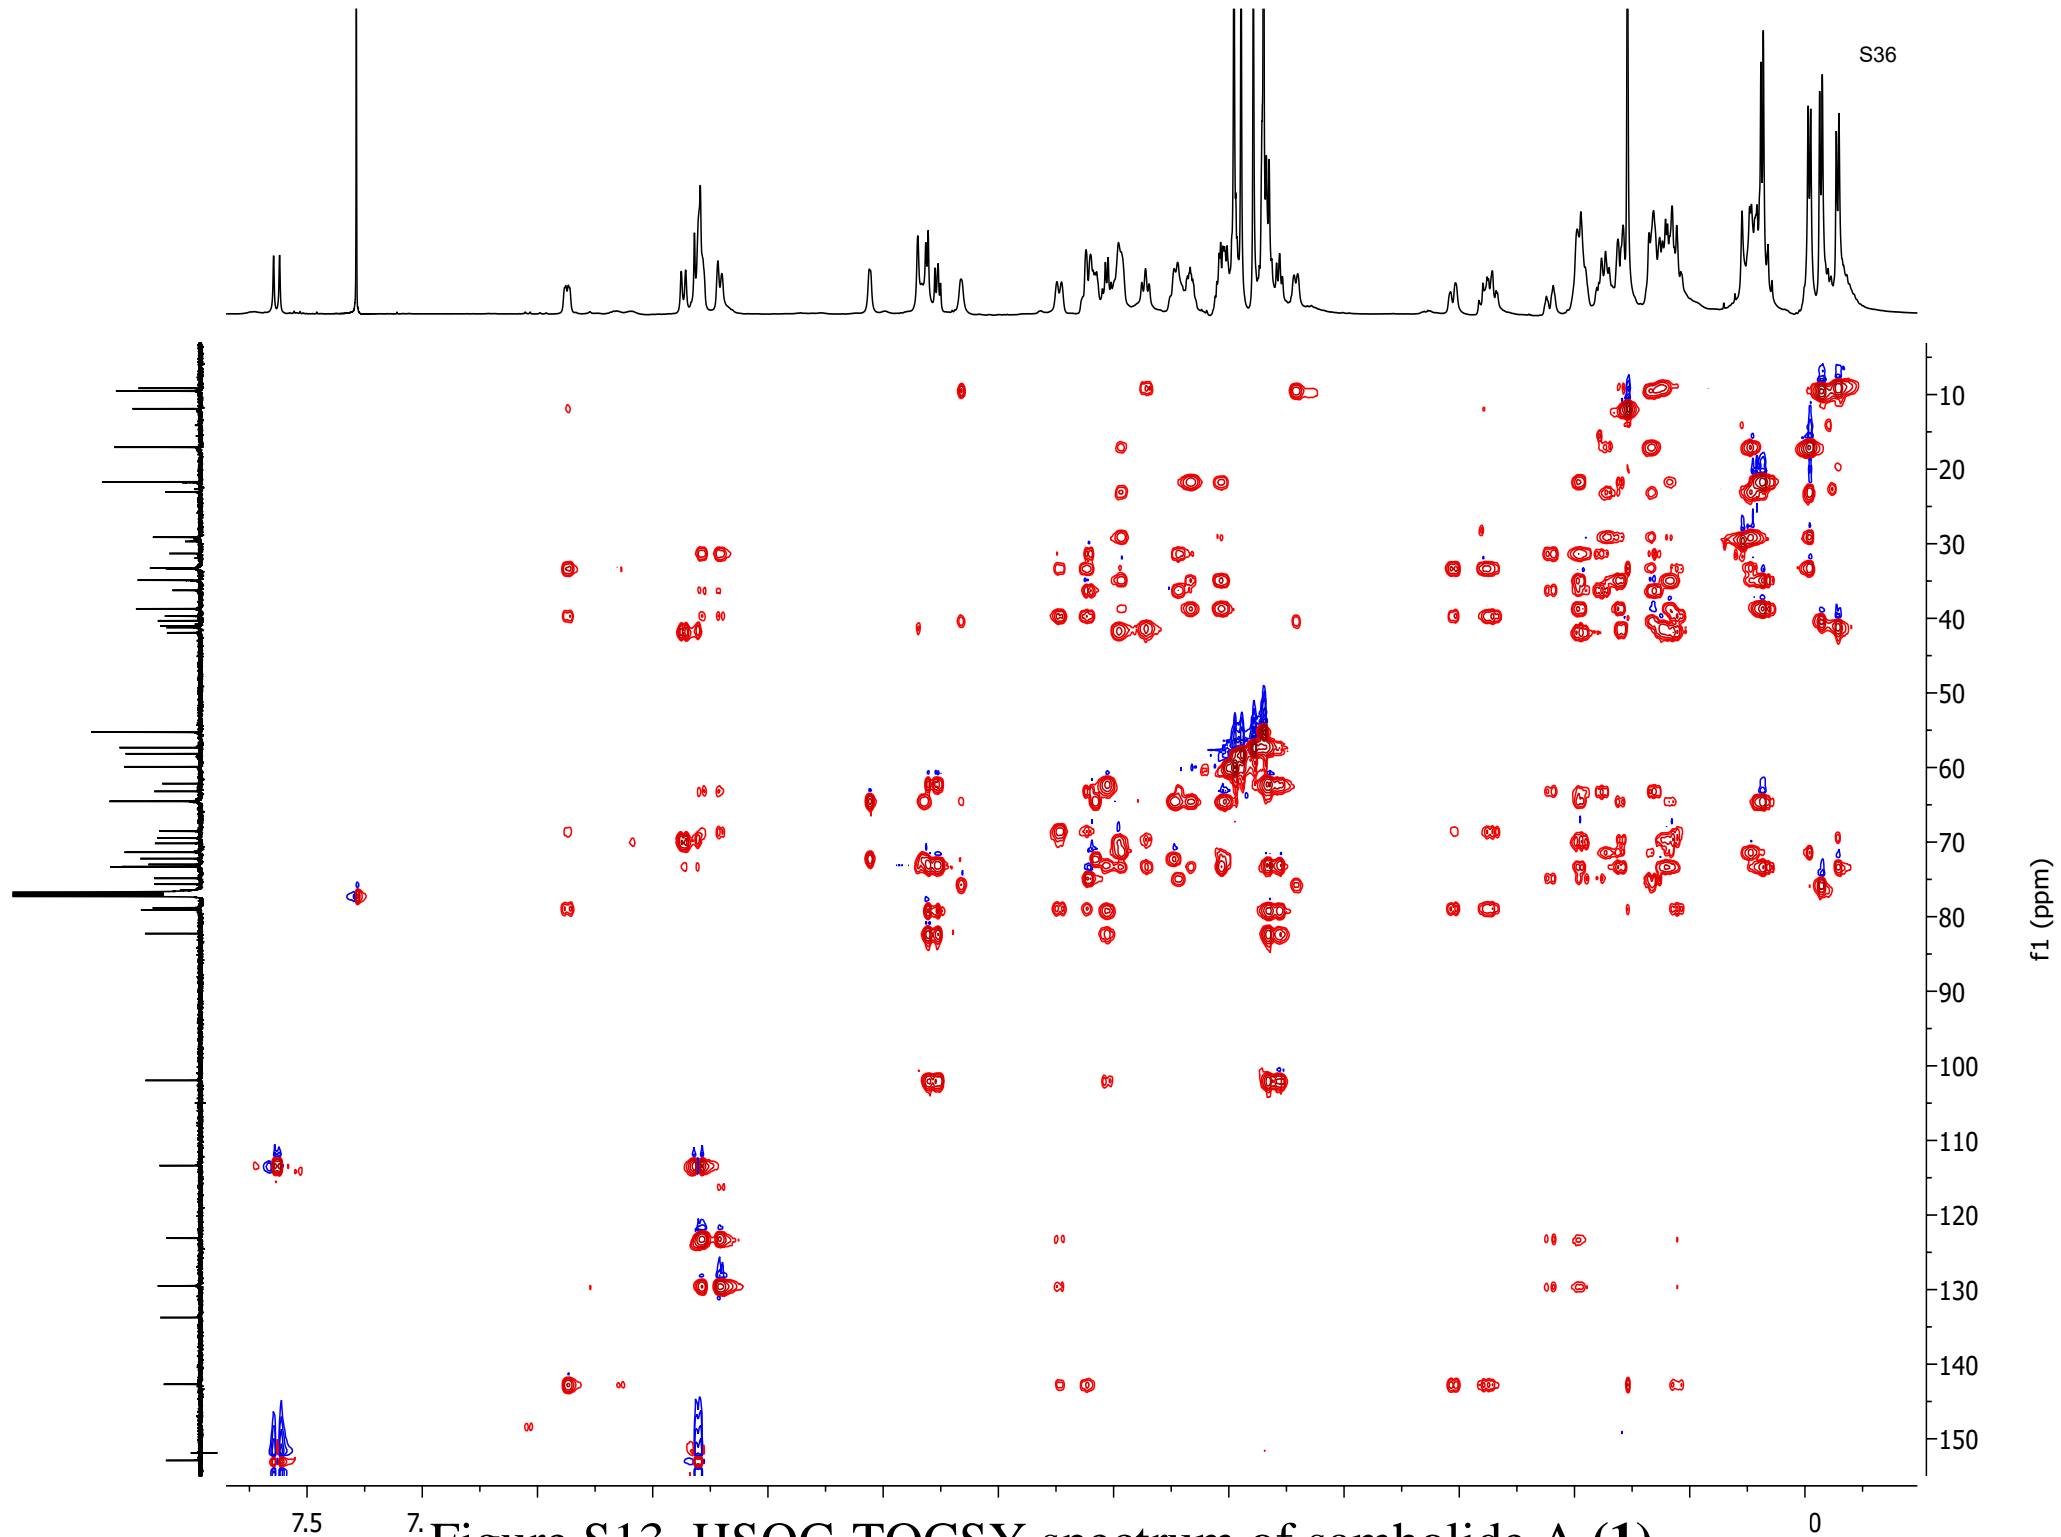

Figure S13 HSQC-TOCSY spectrum of samholide A (1)

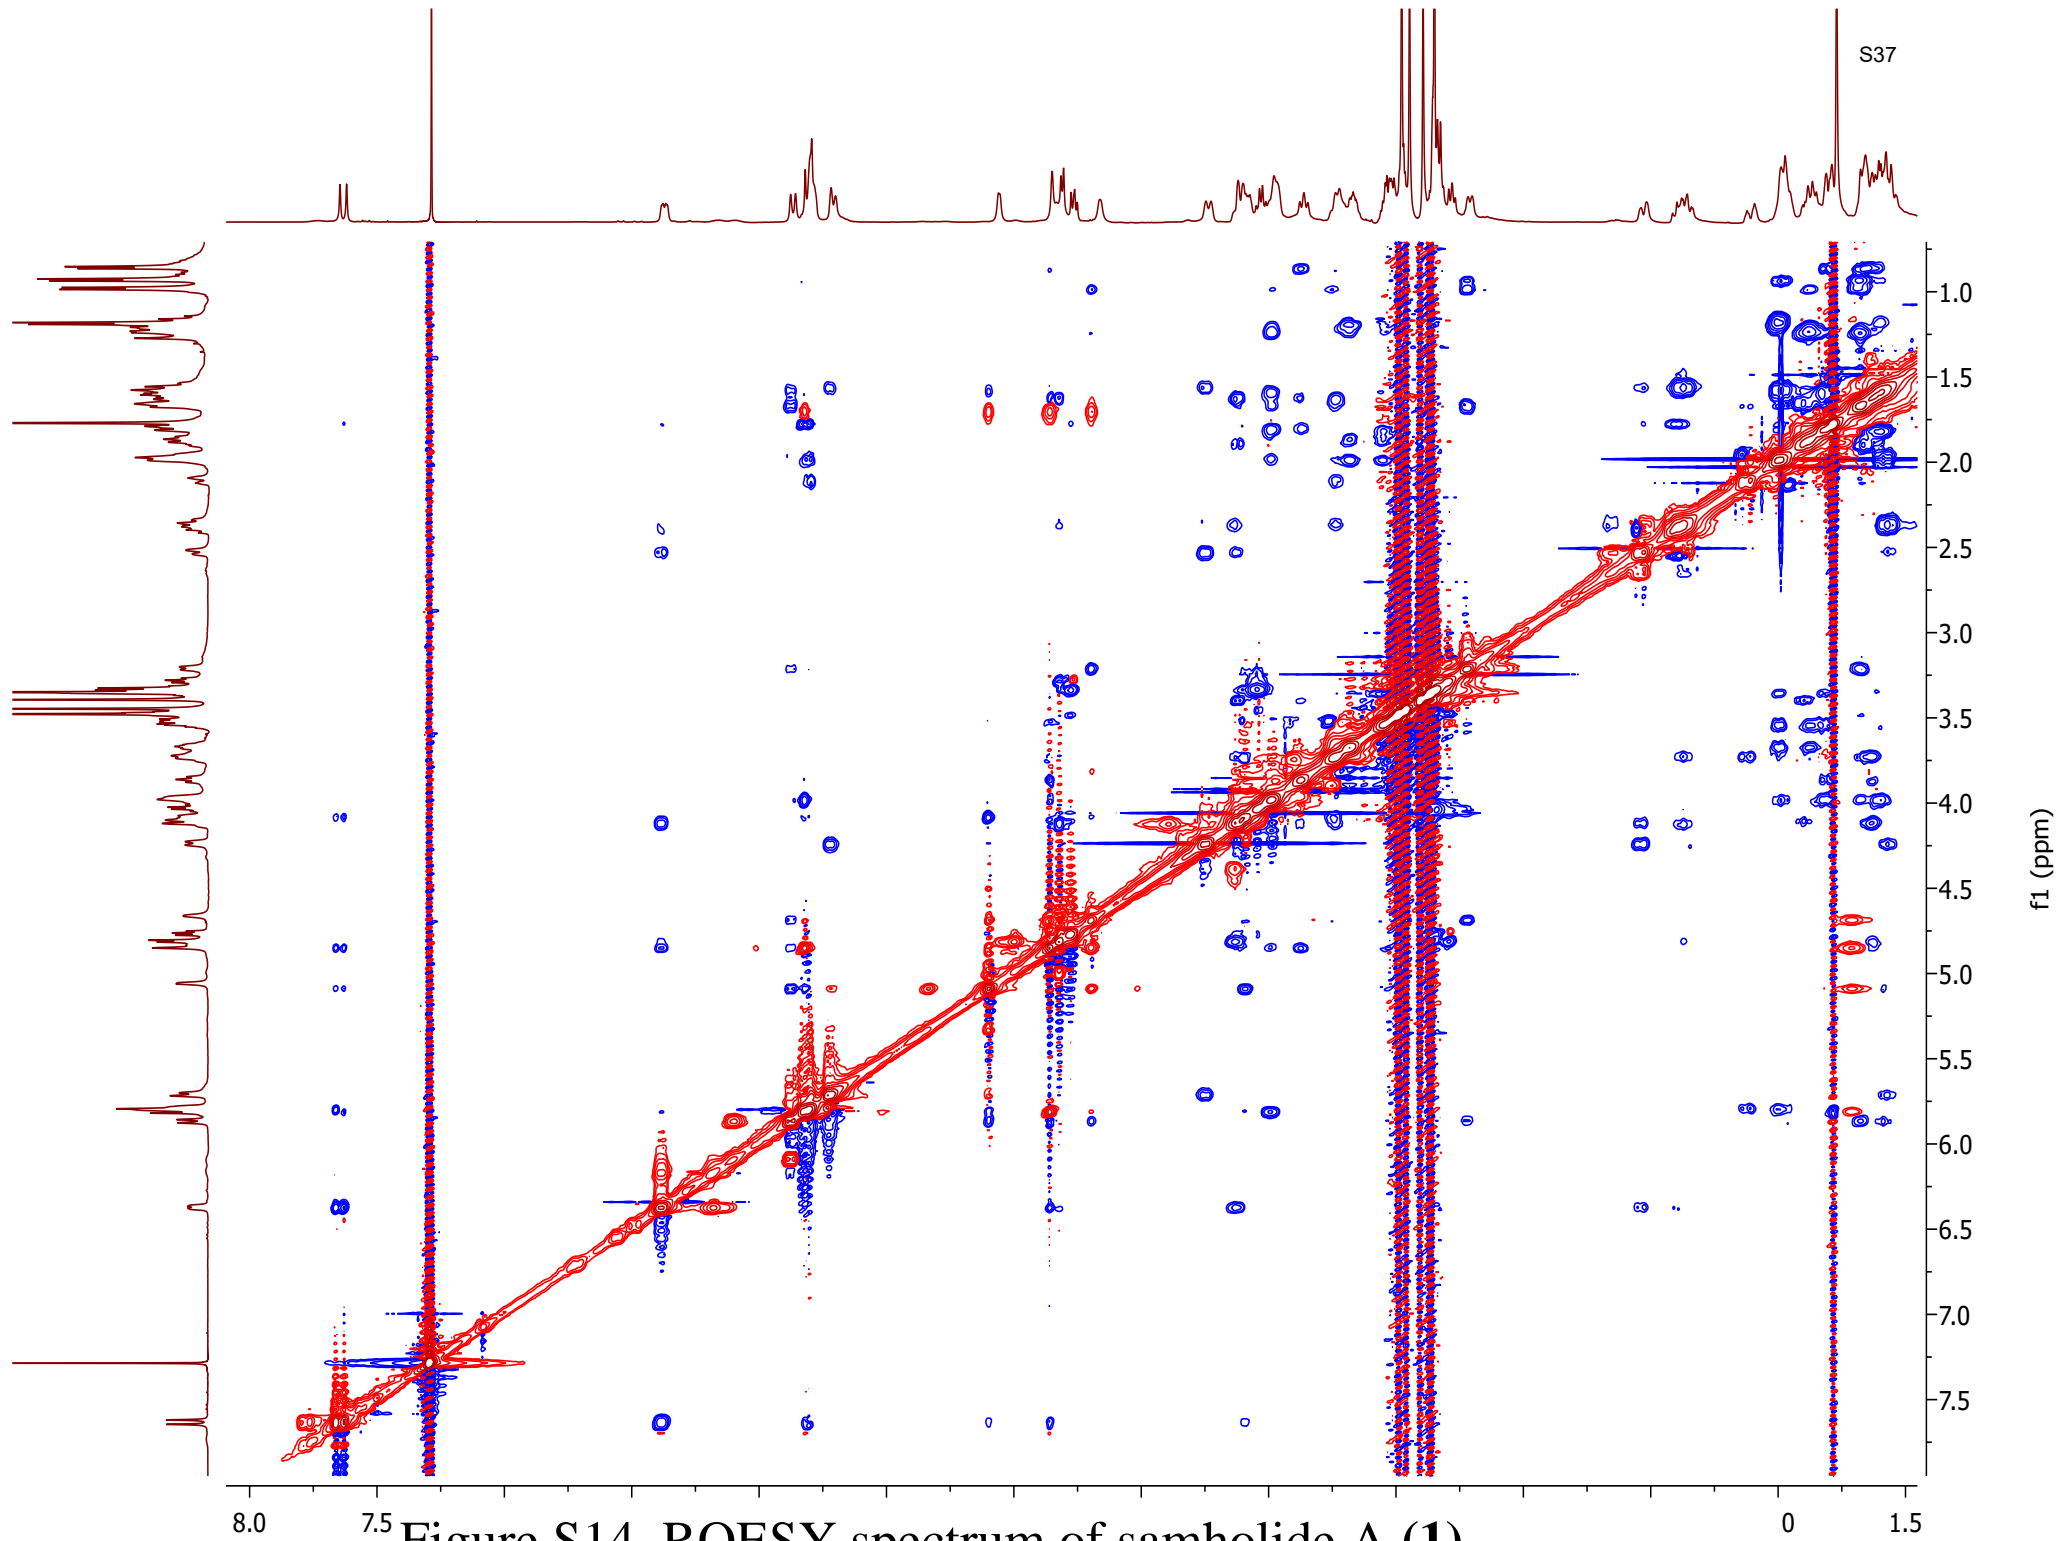

Figure S14 ROESY spectrum of samholide A (1)

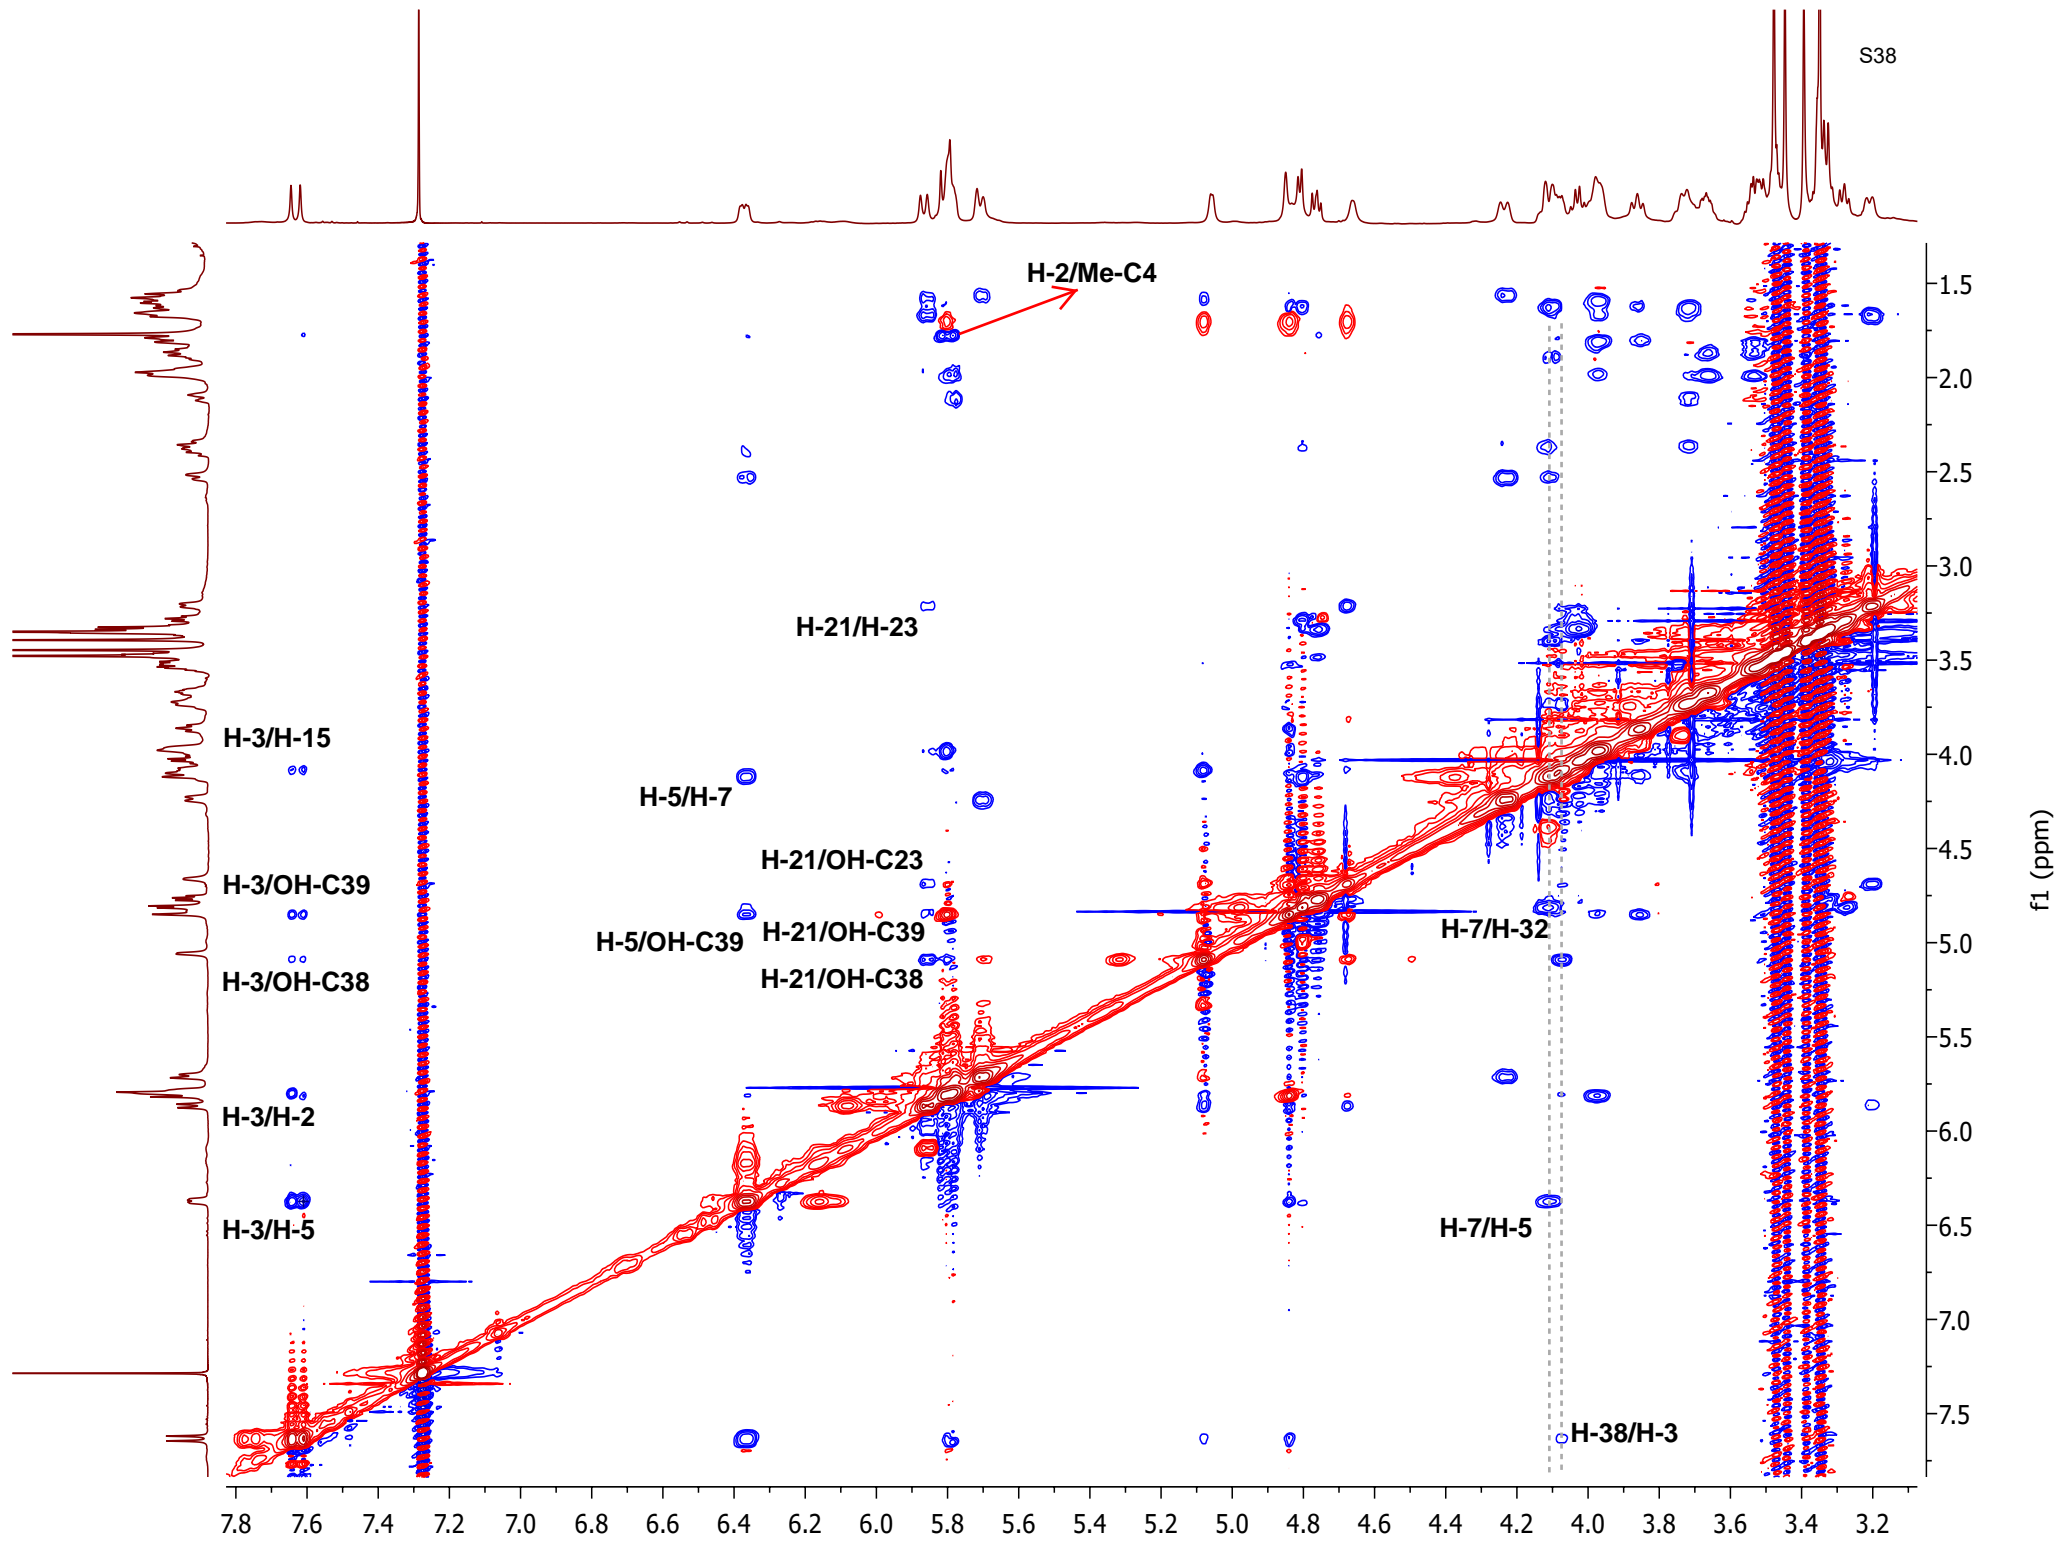

Figure S15 Amplified ROESY spectrum of samholide A (1)

C7-a #44-52 RT: 1.06-1.25 AV: 9 SB: 7 0.74-0.89 NL: 2.70E7  
T: + c Full ms [ 300.00-2000.00]

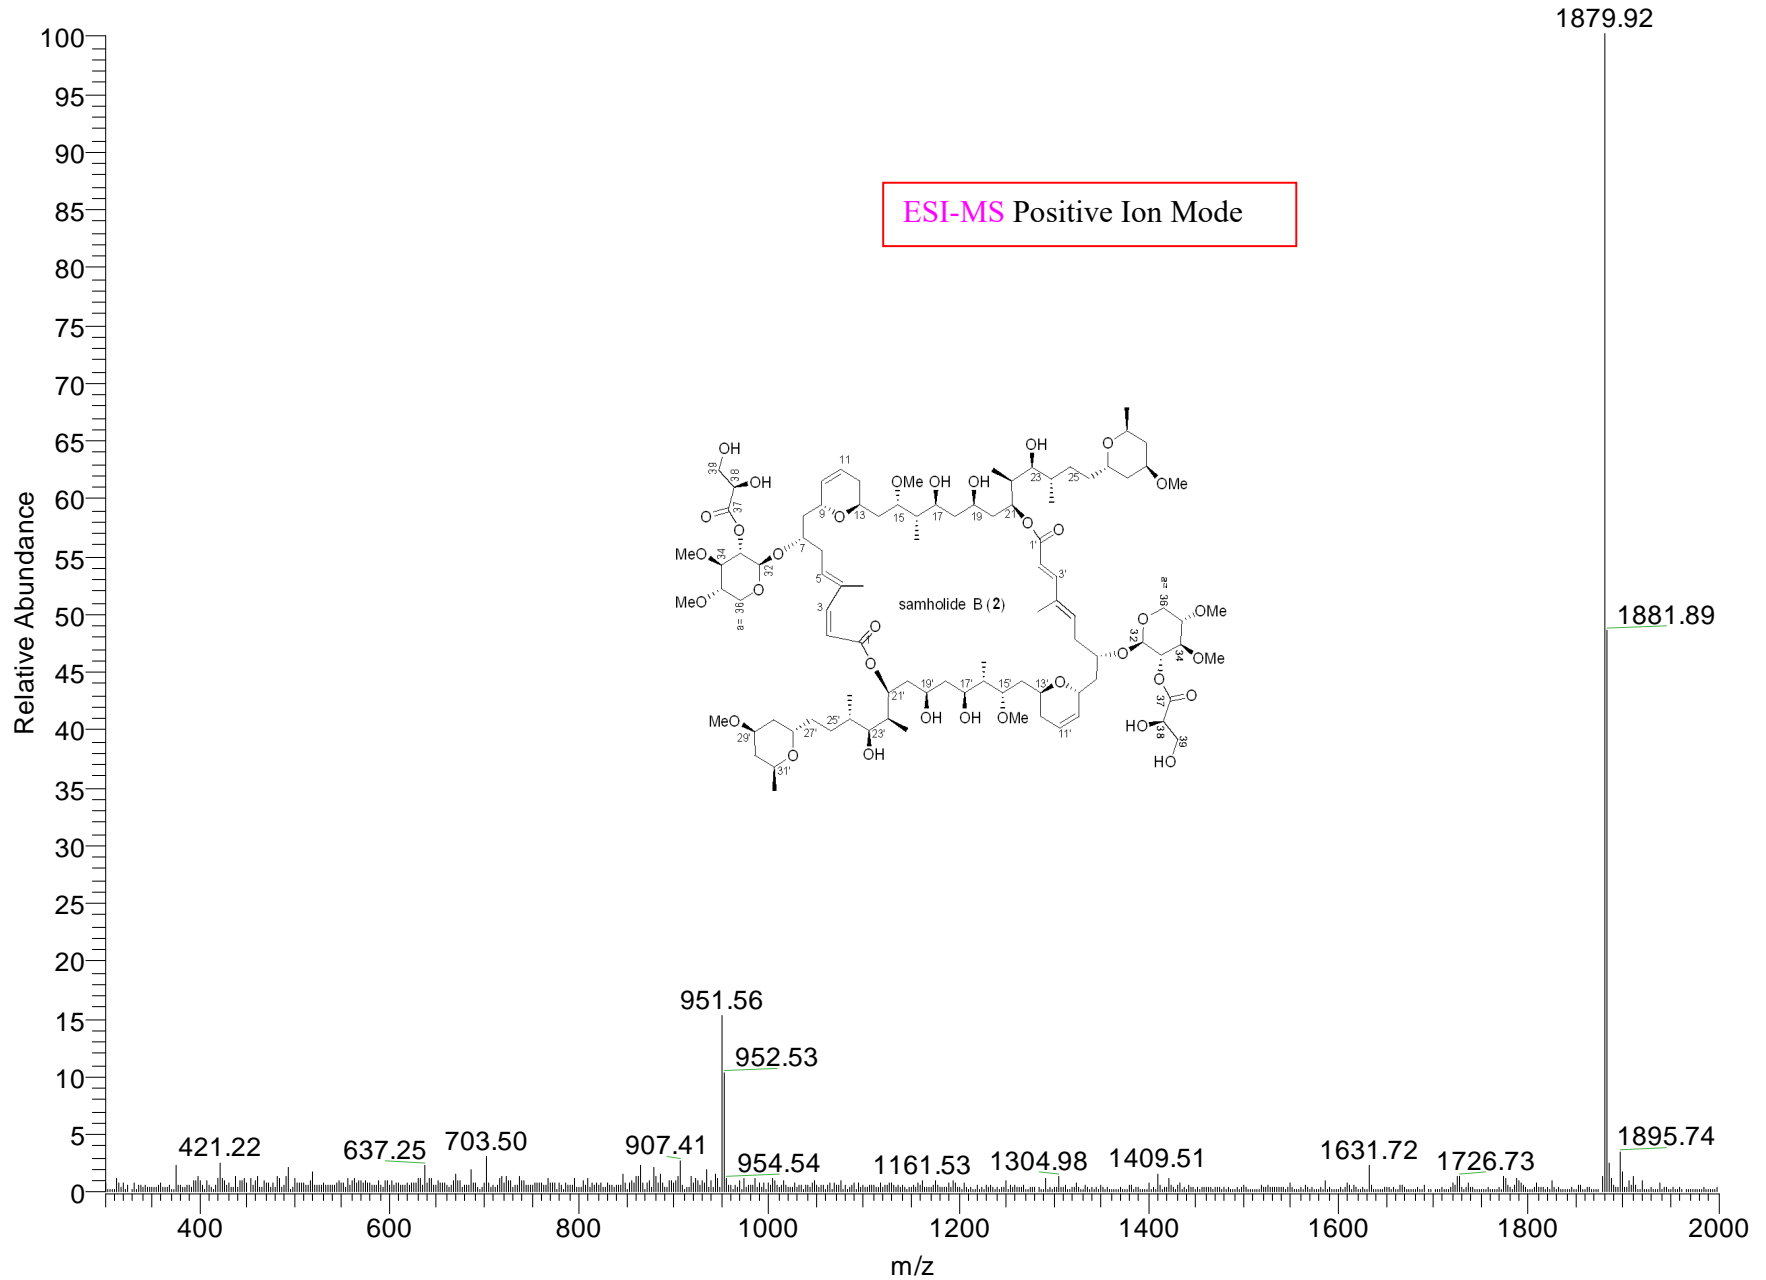

Figure S16 The ESI MS spectrum of samholide B (2)

C7-a #162-172 RT: 3.96-4.13 AV: 11 SB: 7 3.62-3.79 NL: 1.10E7  
T: +c Full ms2 1880.00@35.00 [515.00-2000.00]

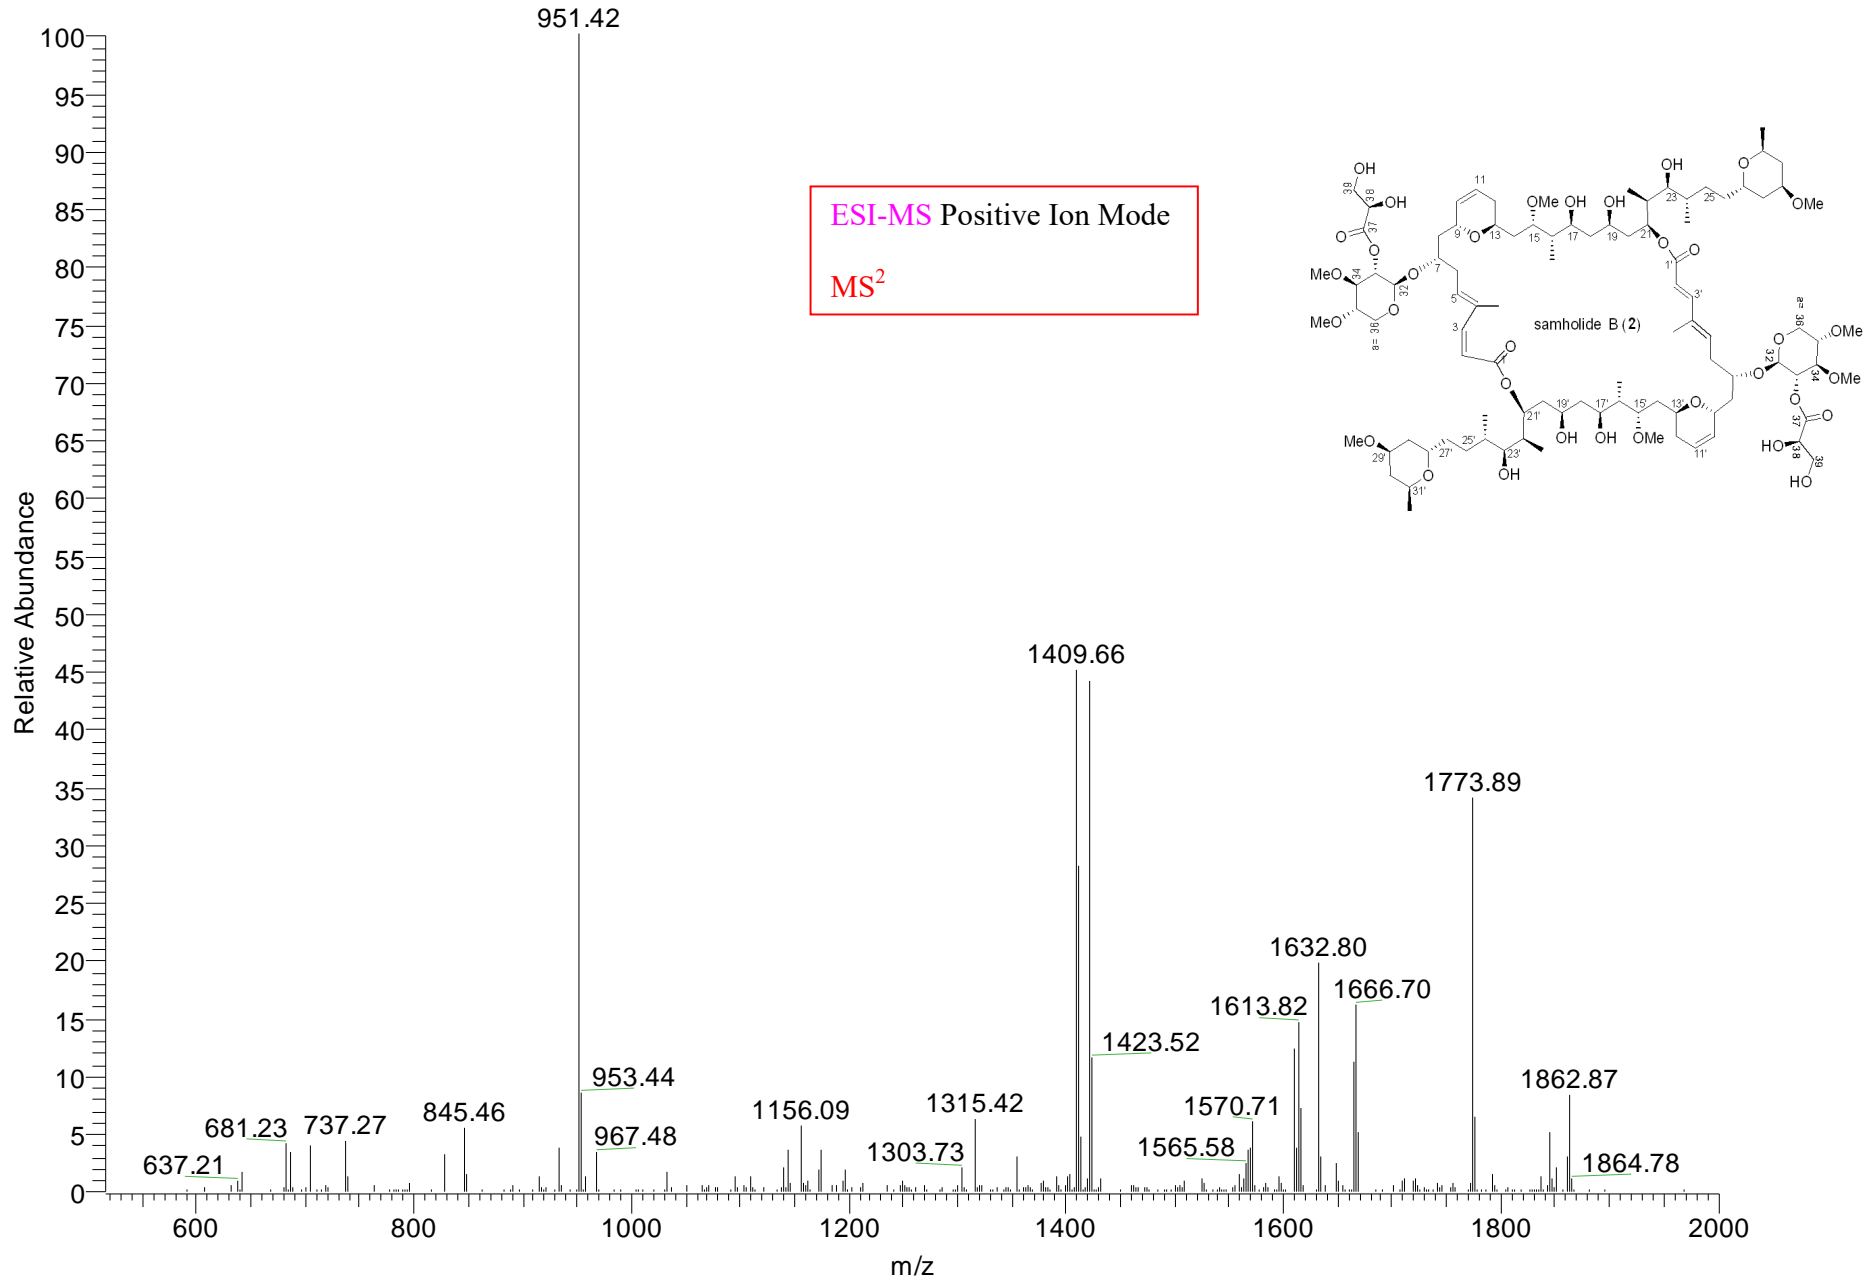

Figure S17 The ESI MS<sup>2</sup> spectrum of samholide B (2)



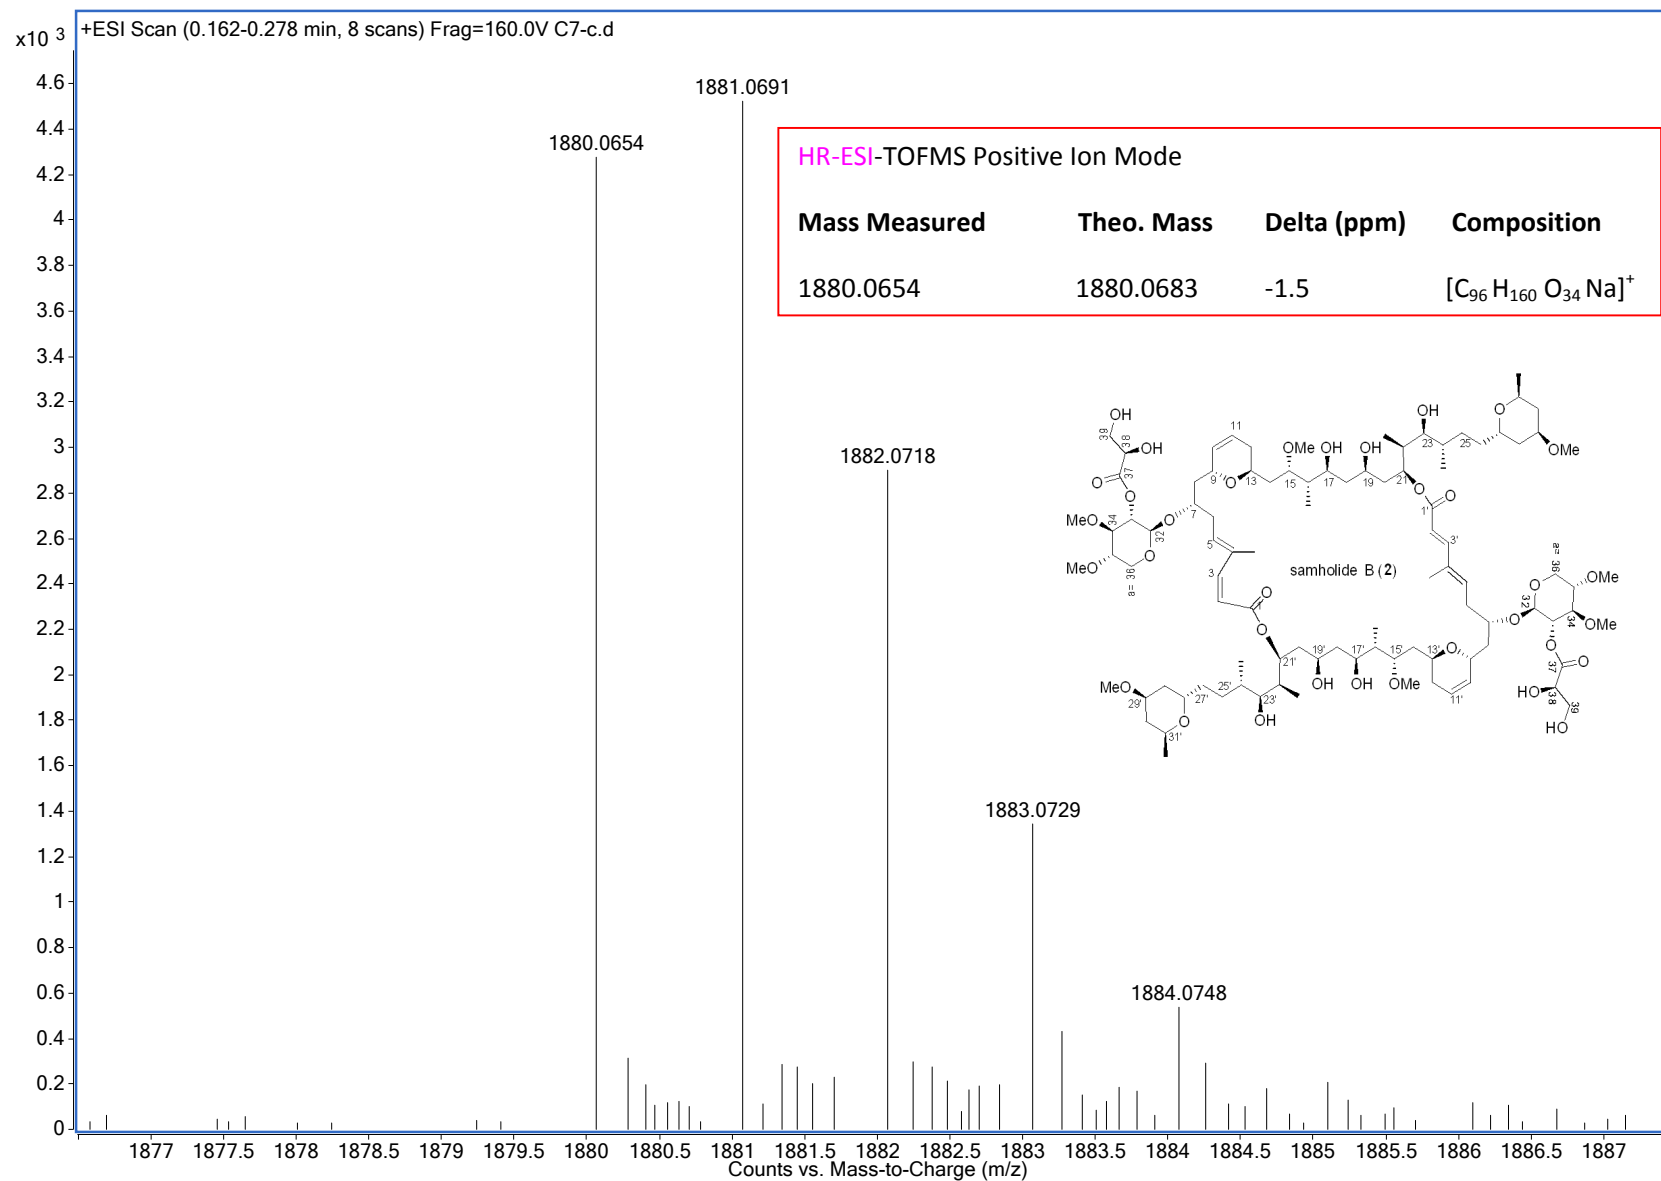

Figure S18 The positive HRESIMS spectrum of samholide B (2)

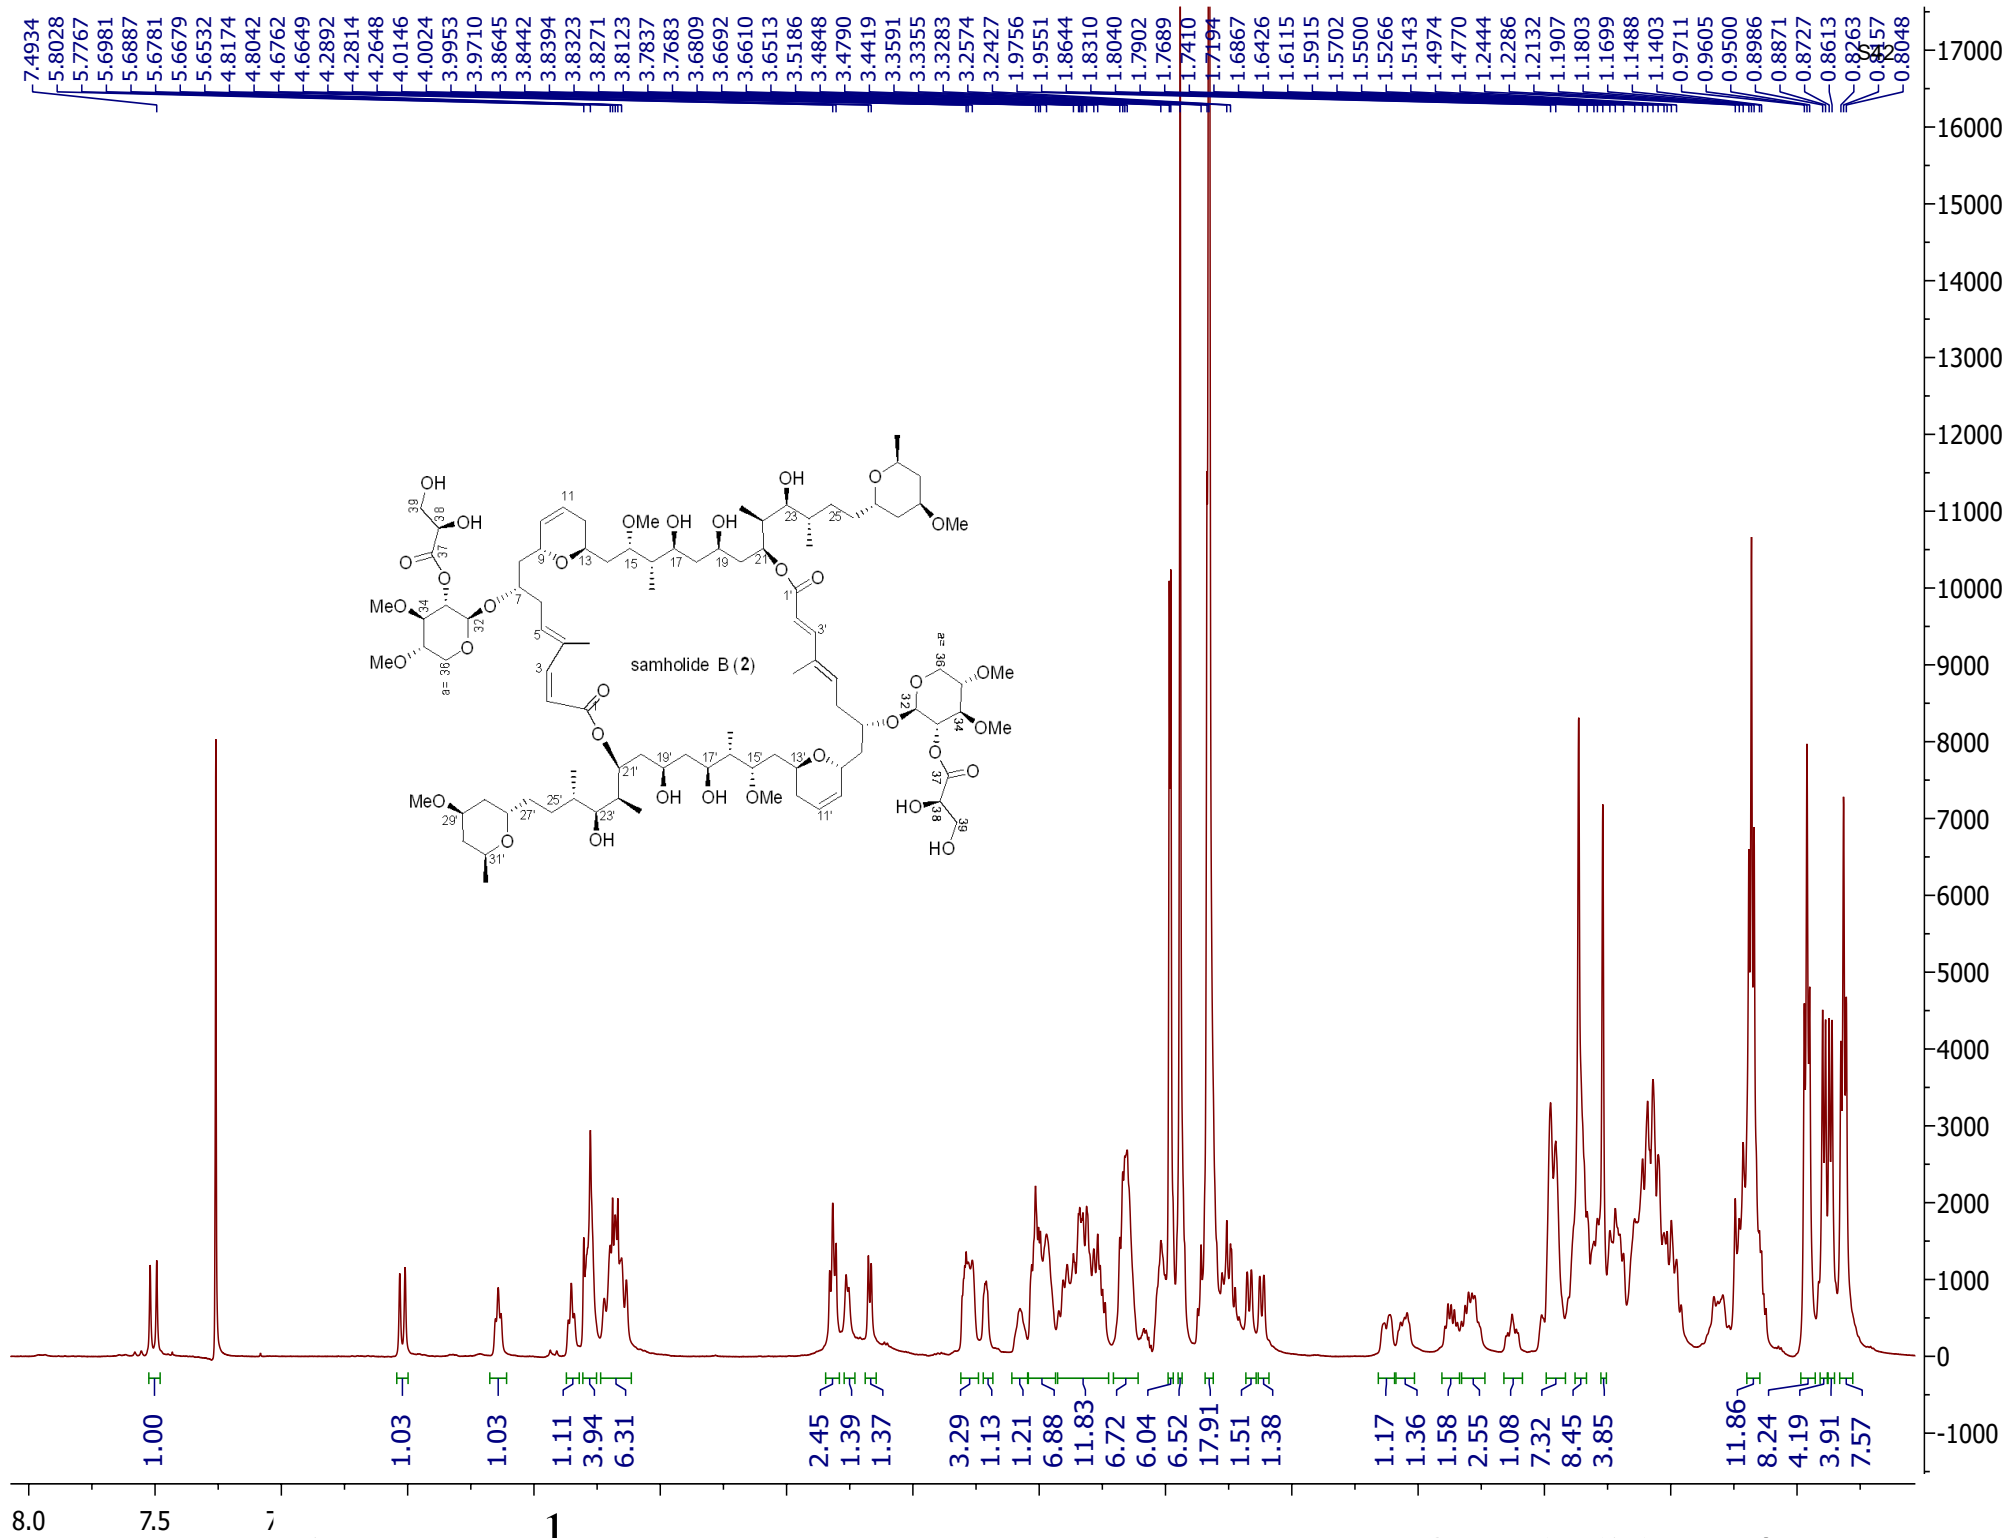

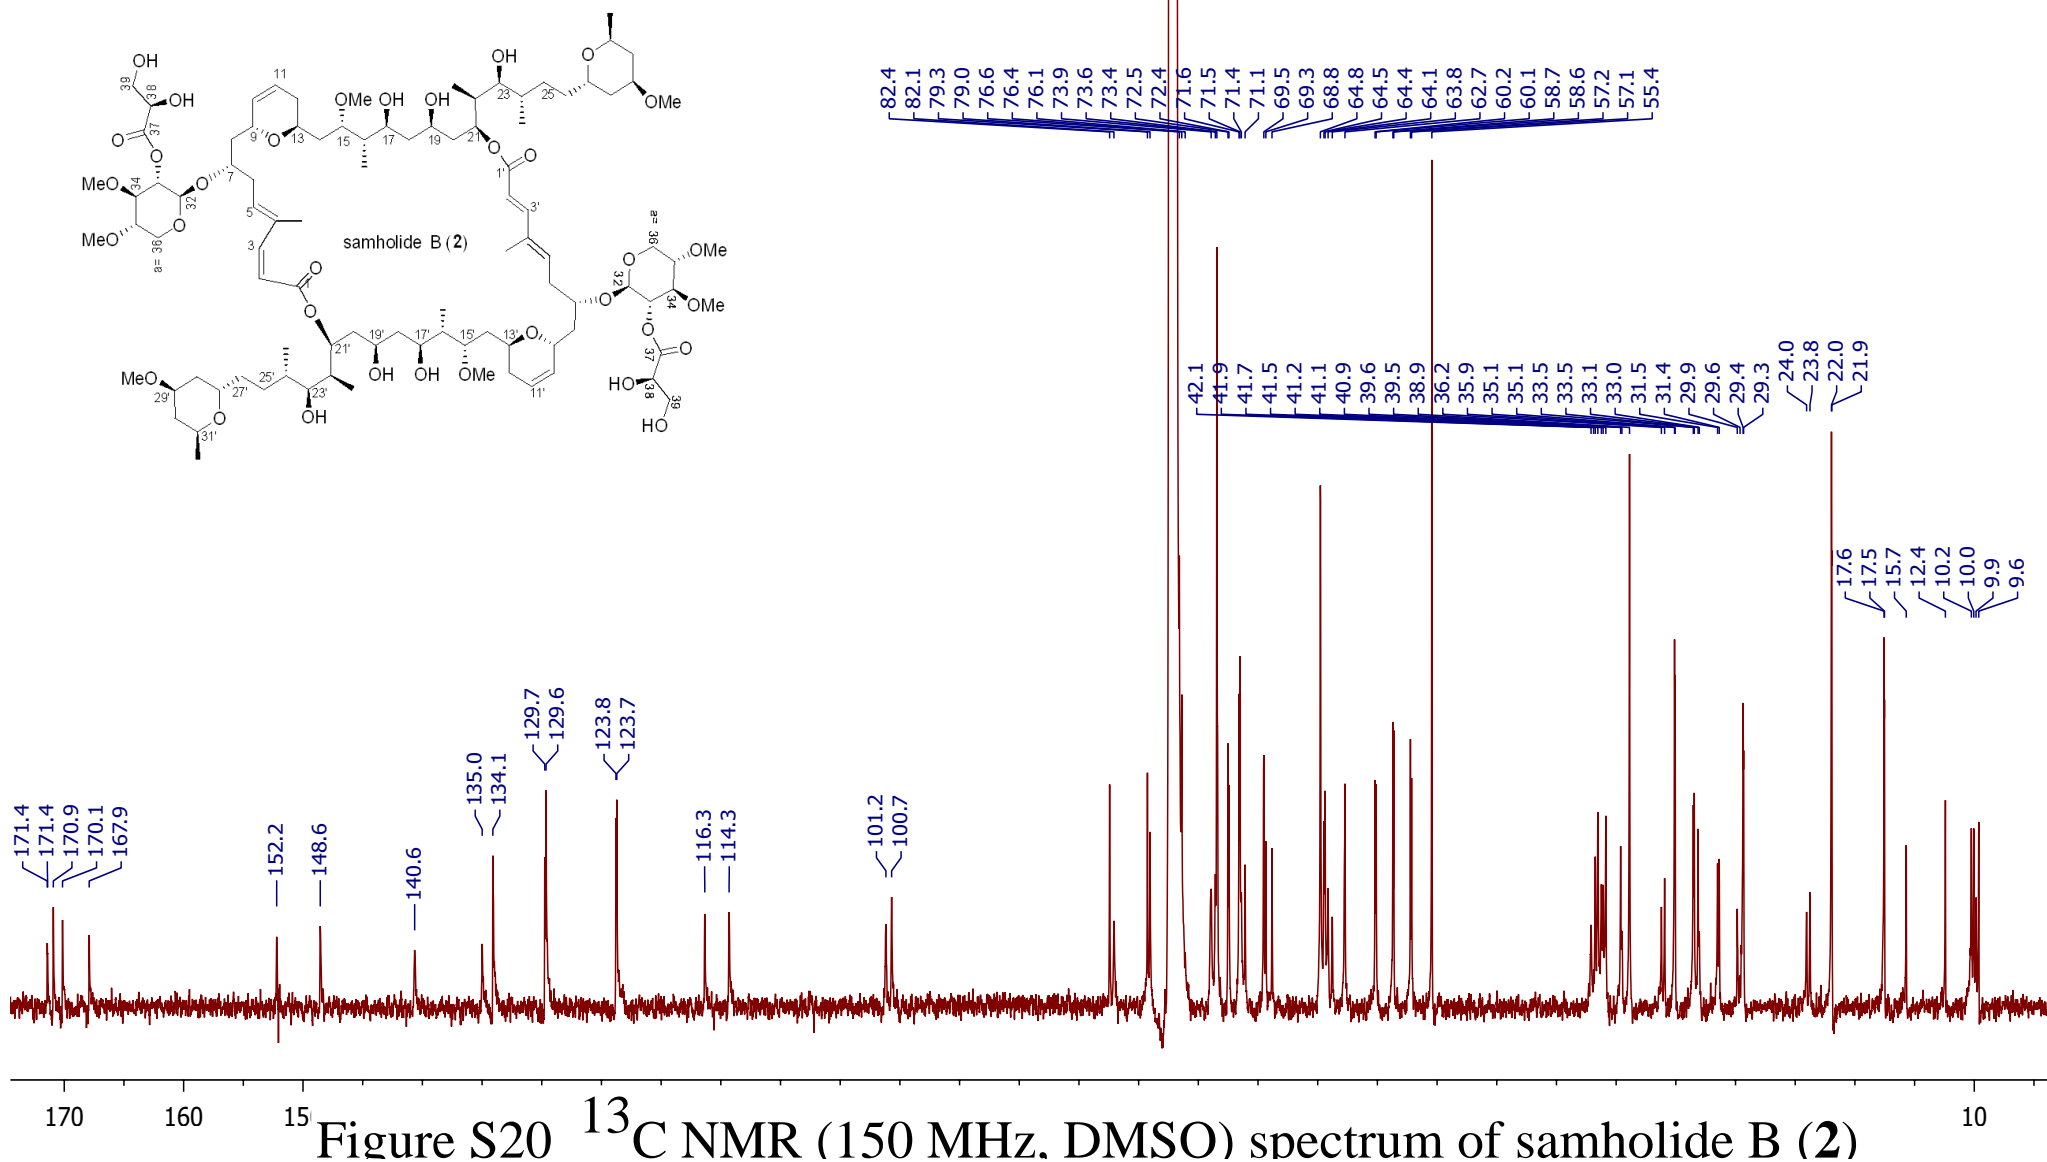

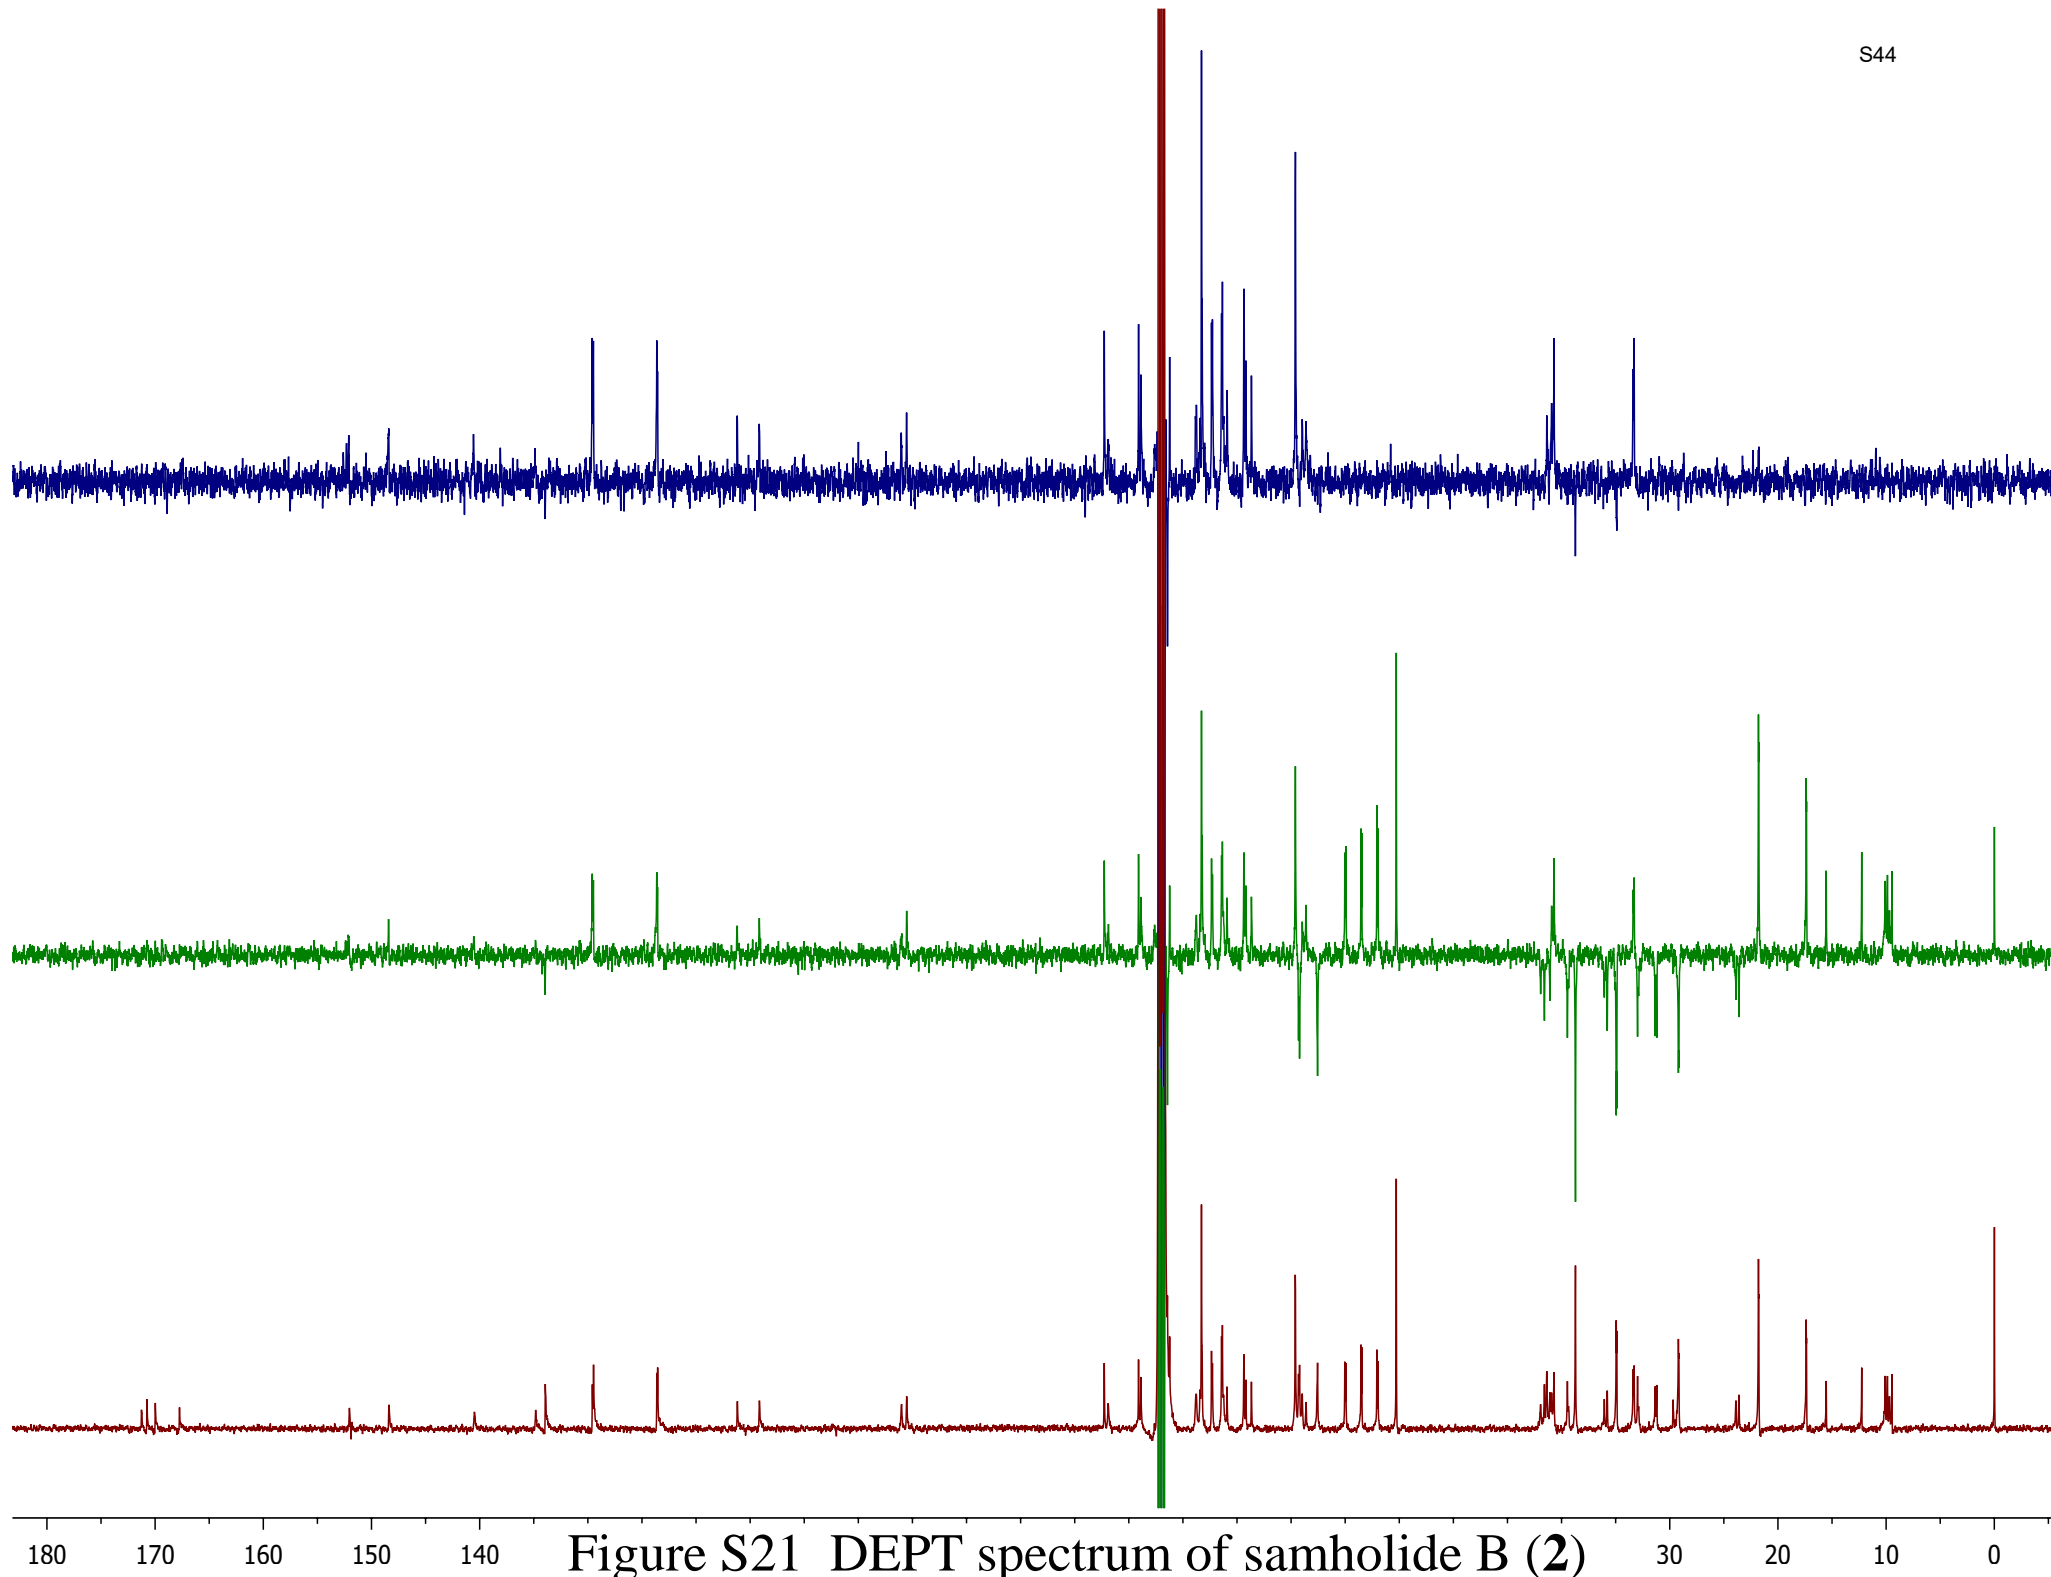

S45

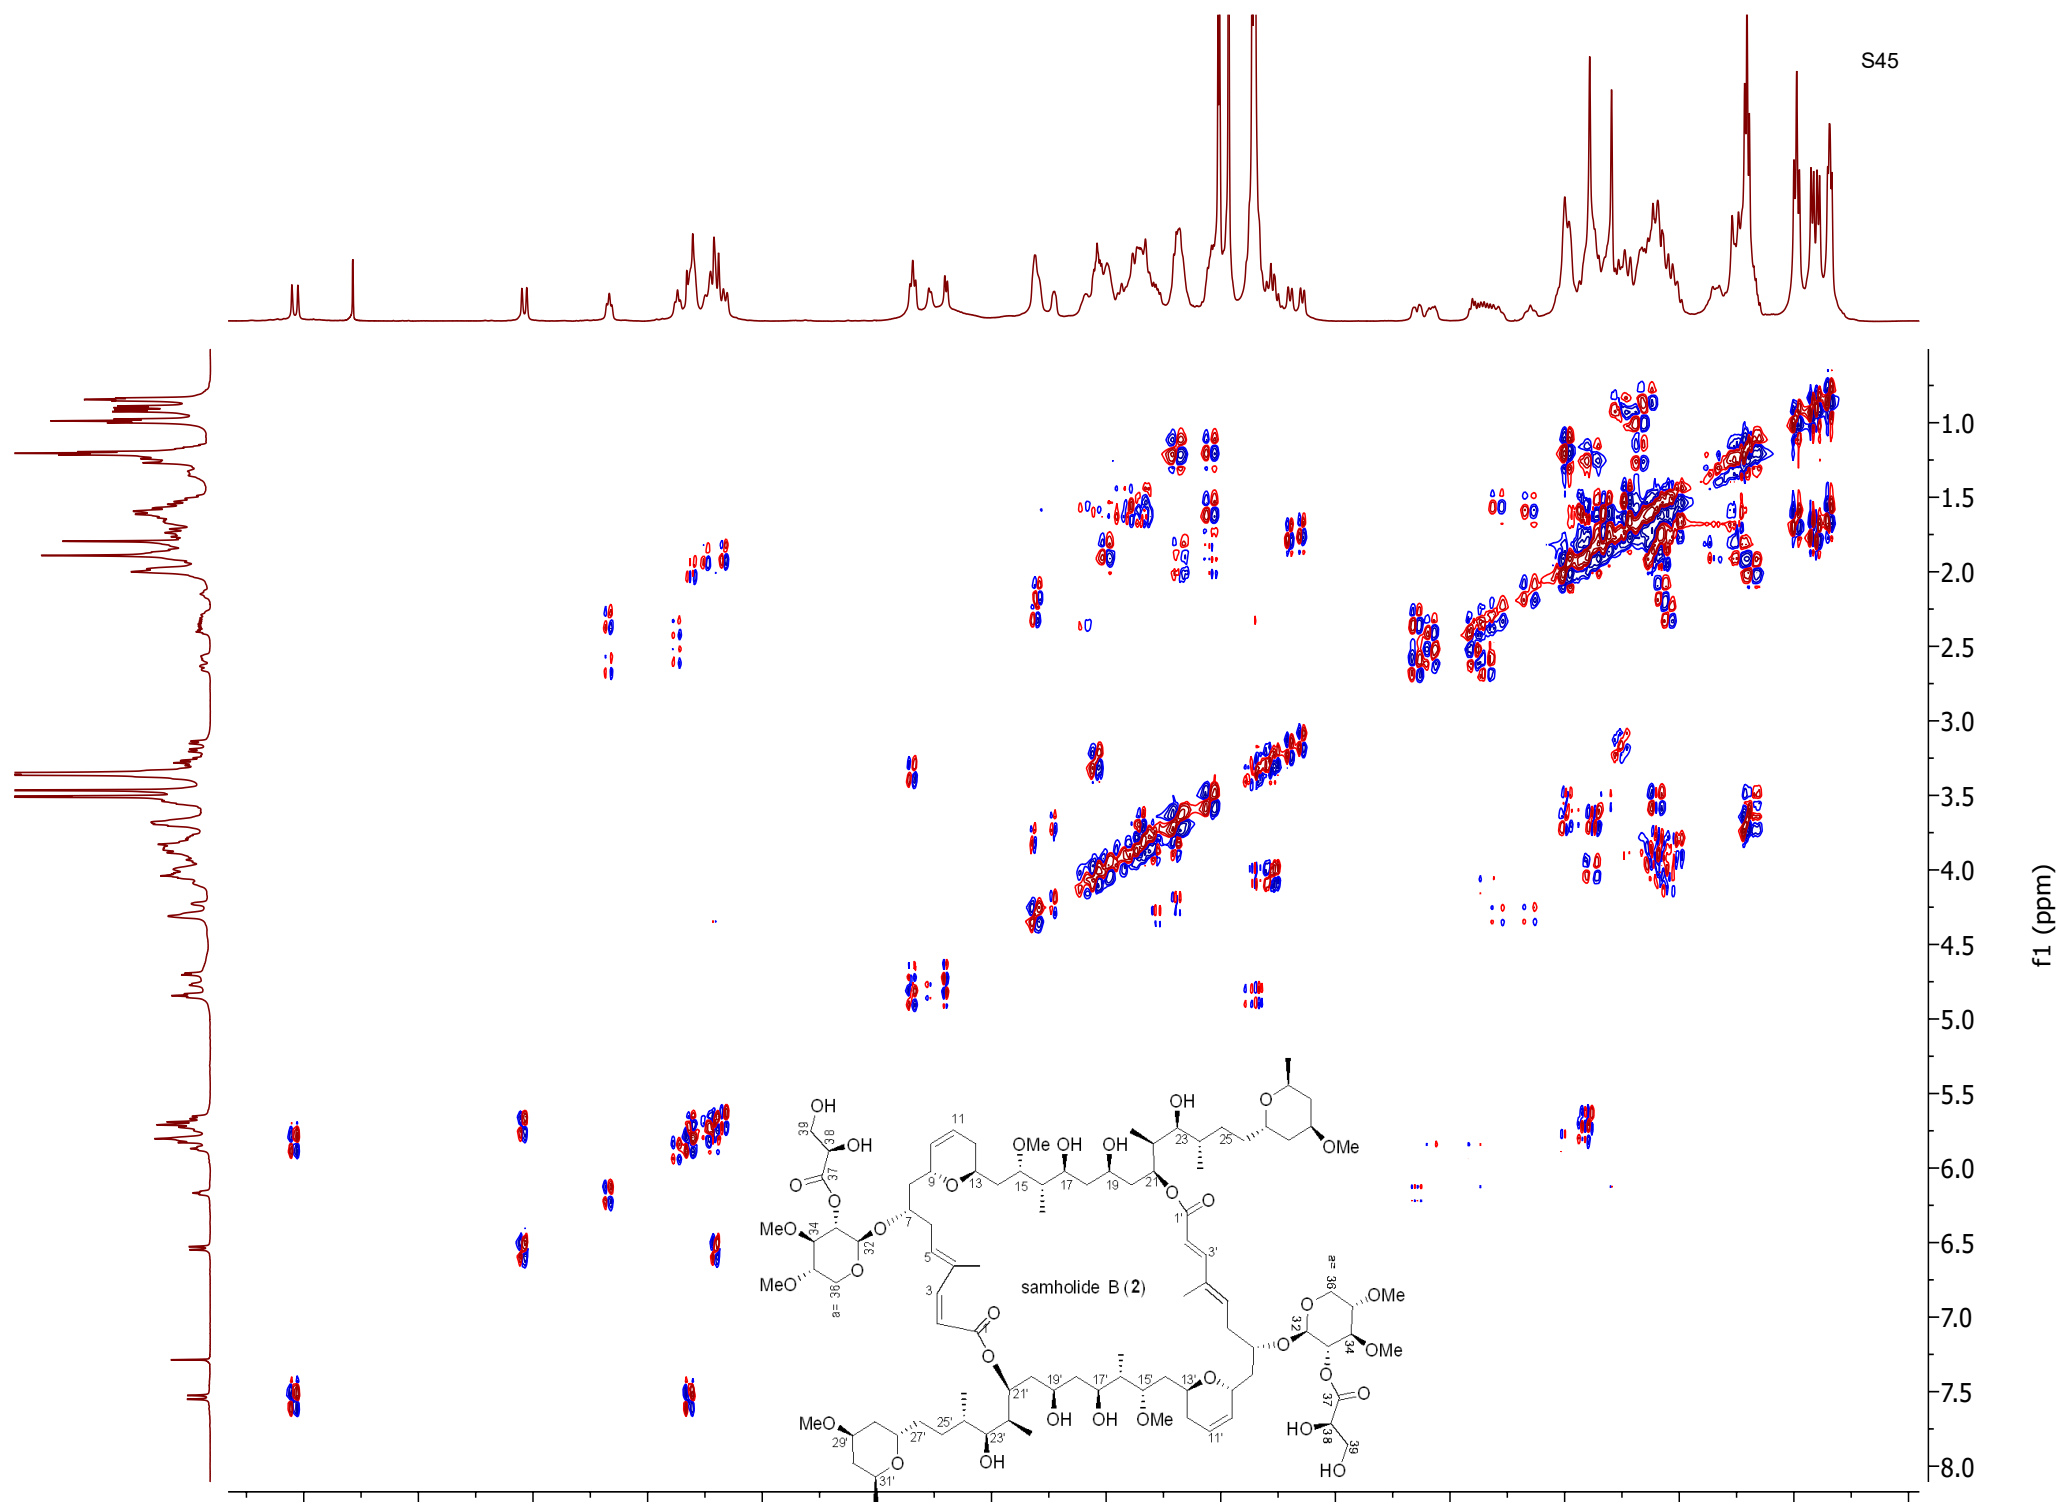

Figure S22  $^1\text{H}$ - $^1\text{H}$  COSY spectrum of samholide B (2)

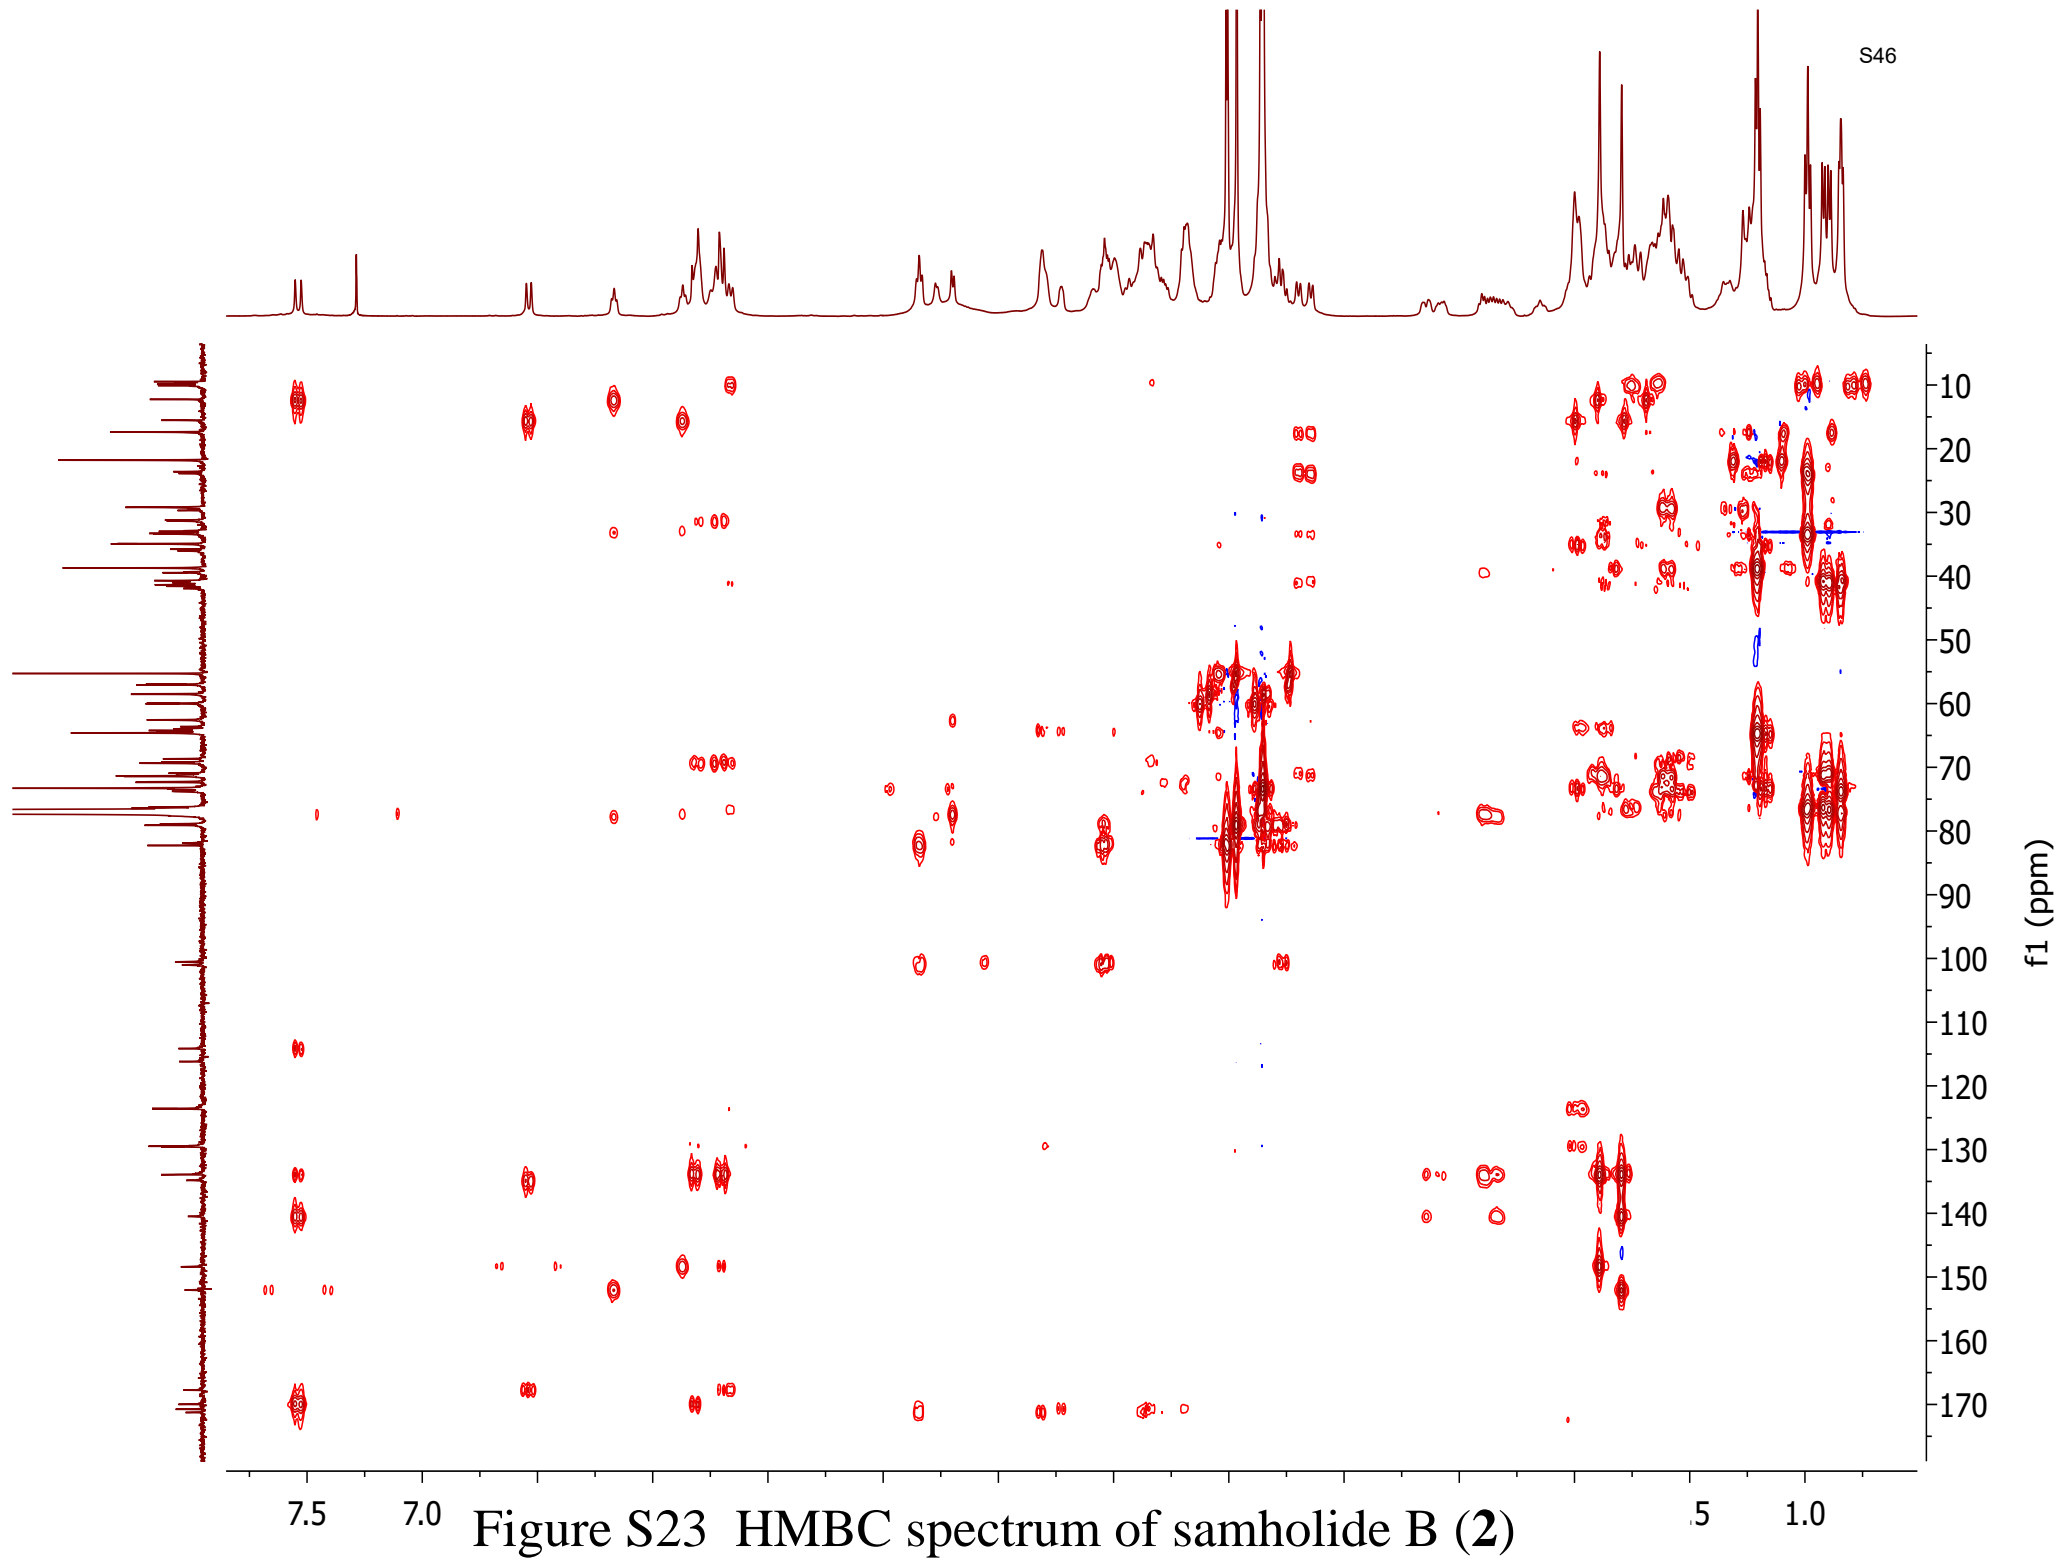

Figure S23 HMBC spectrum of samholide B (2)

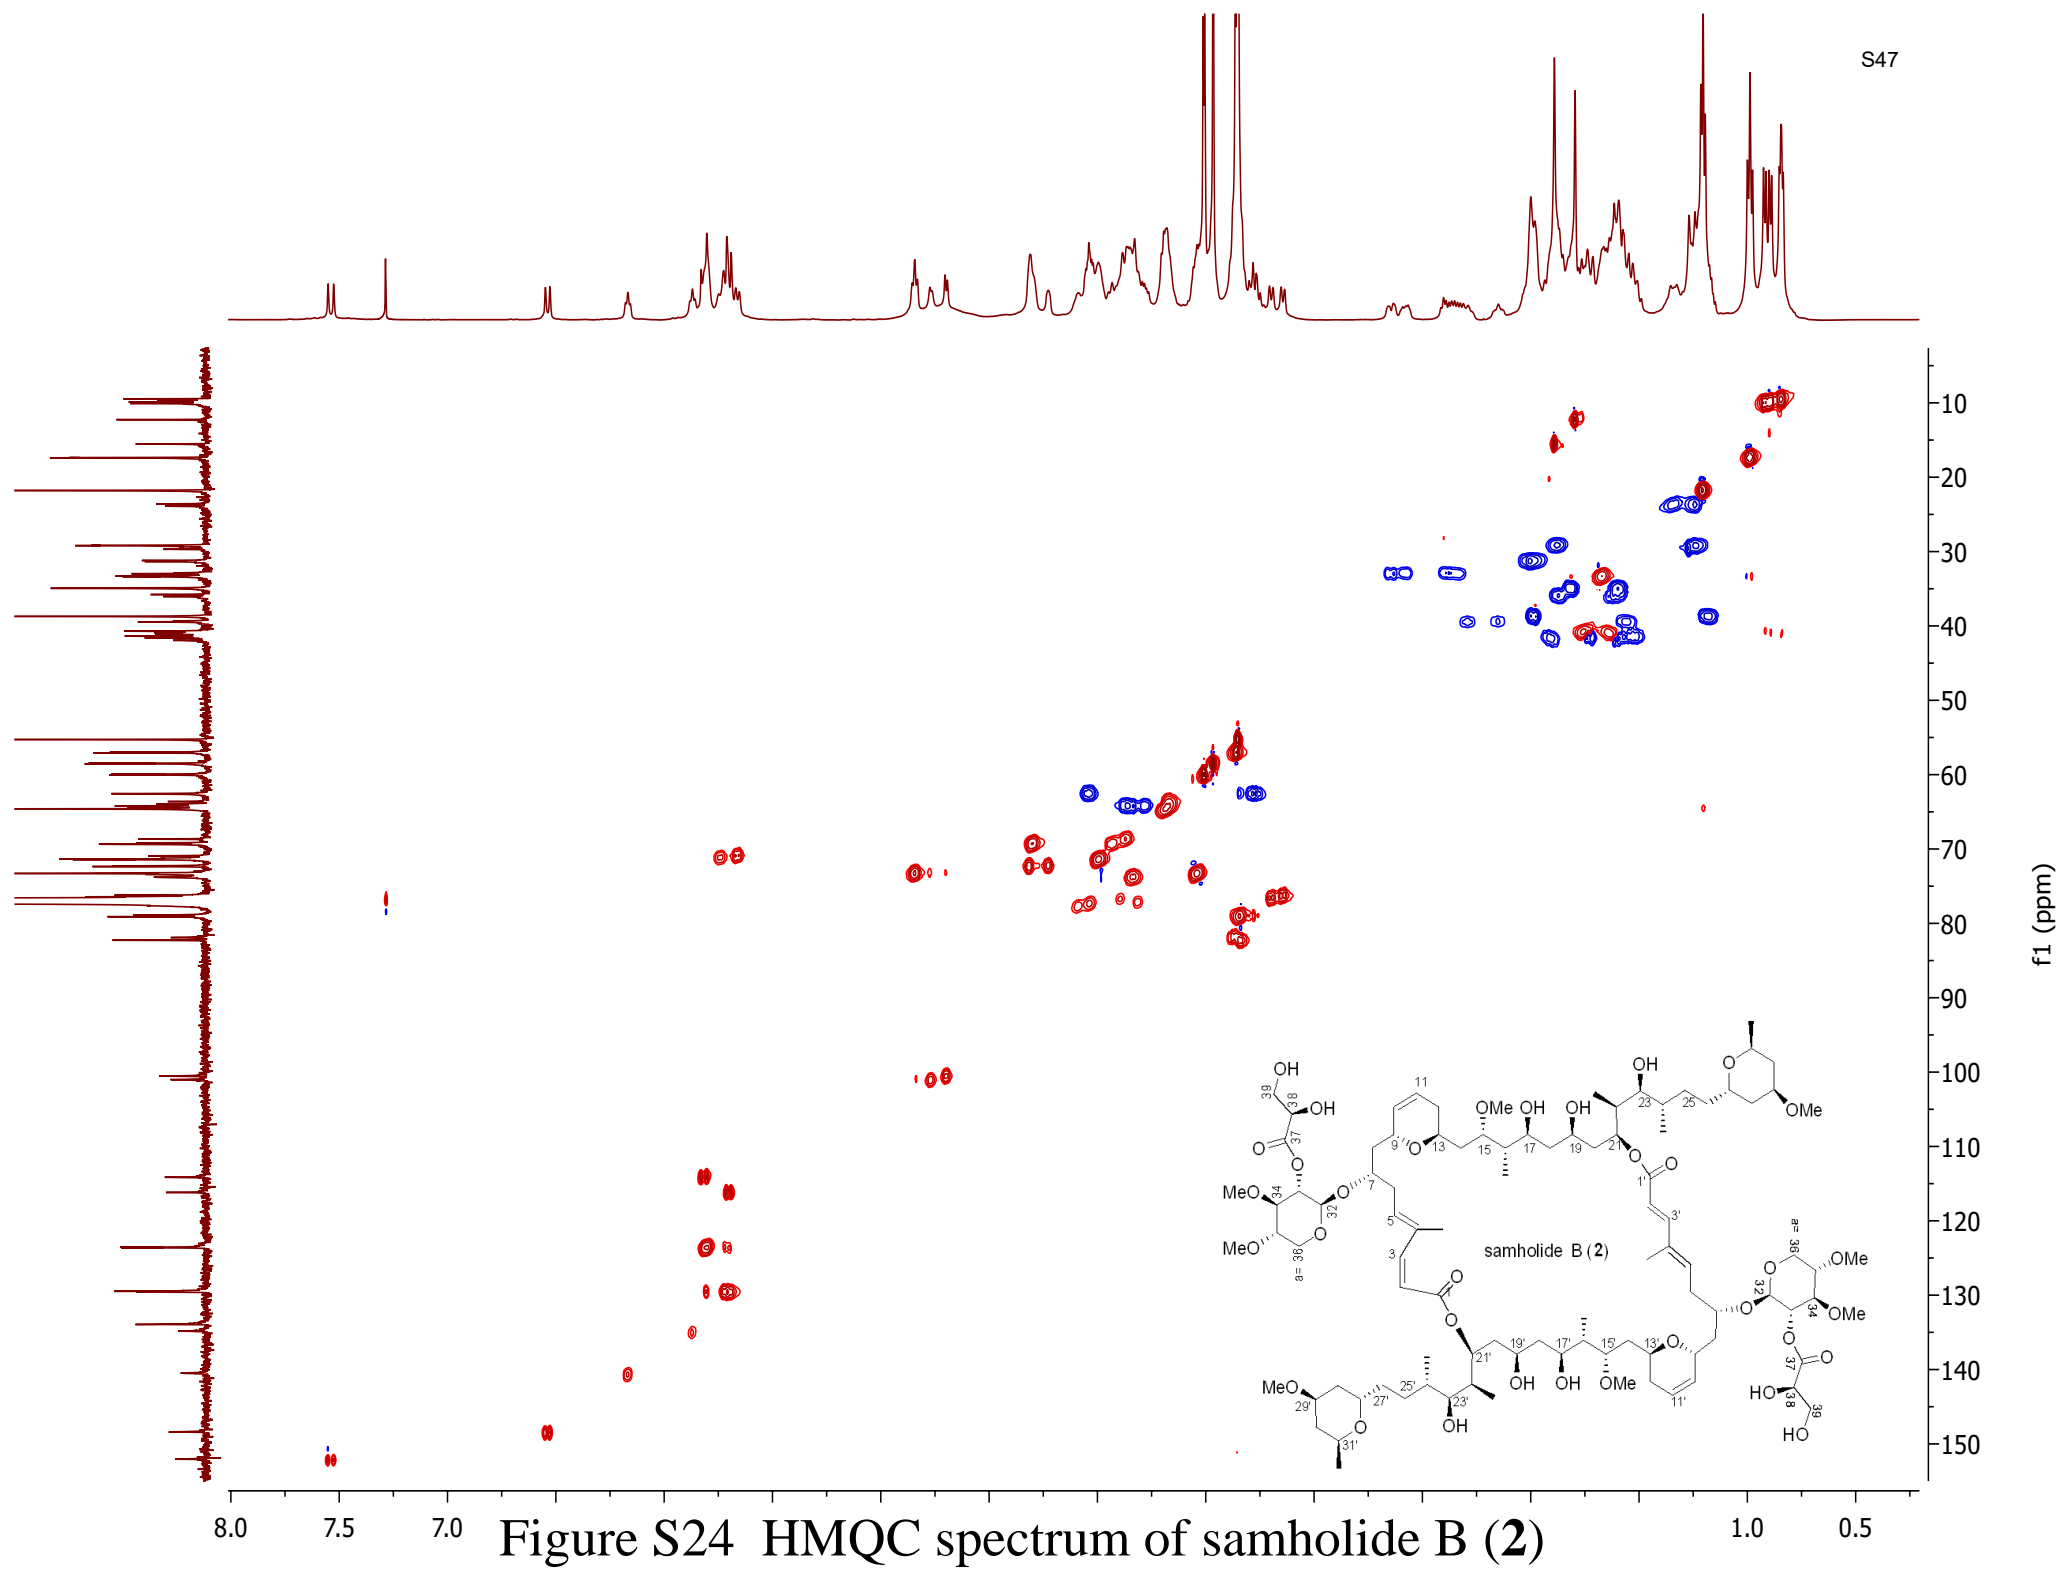

Figure S24 HMQC spectrum of samholide B (2)

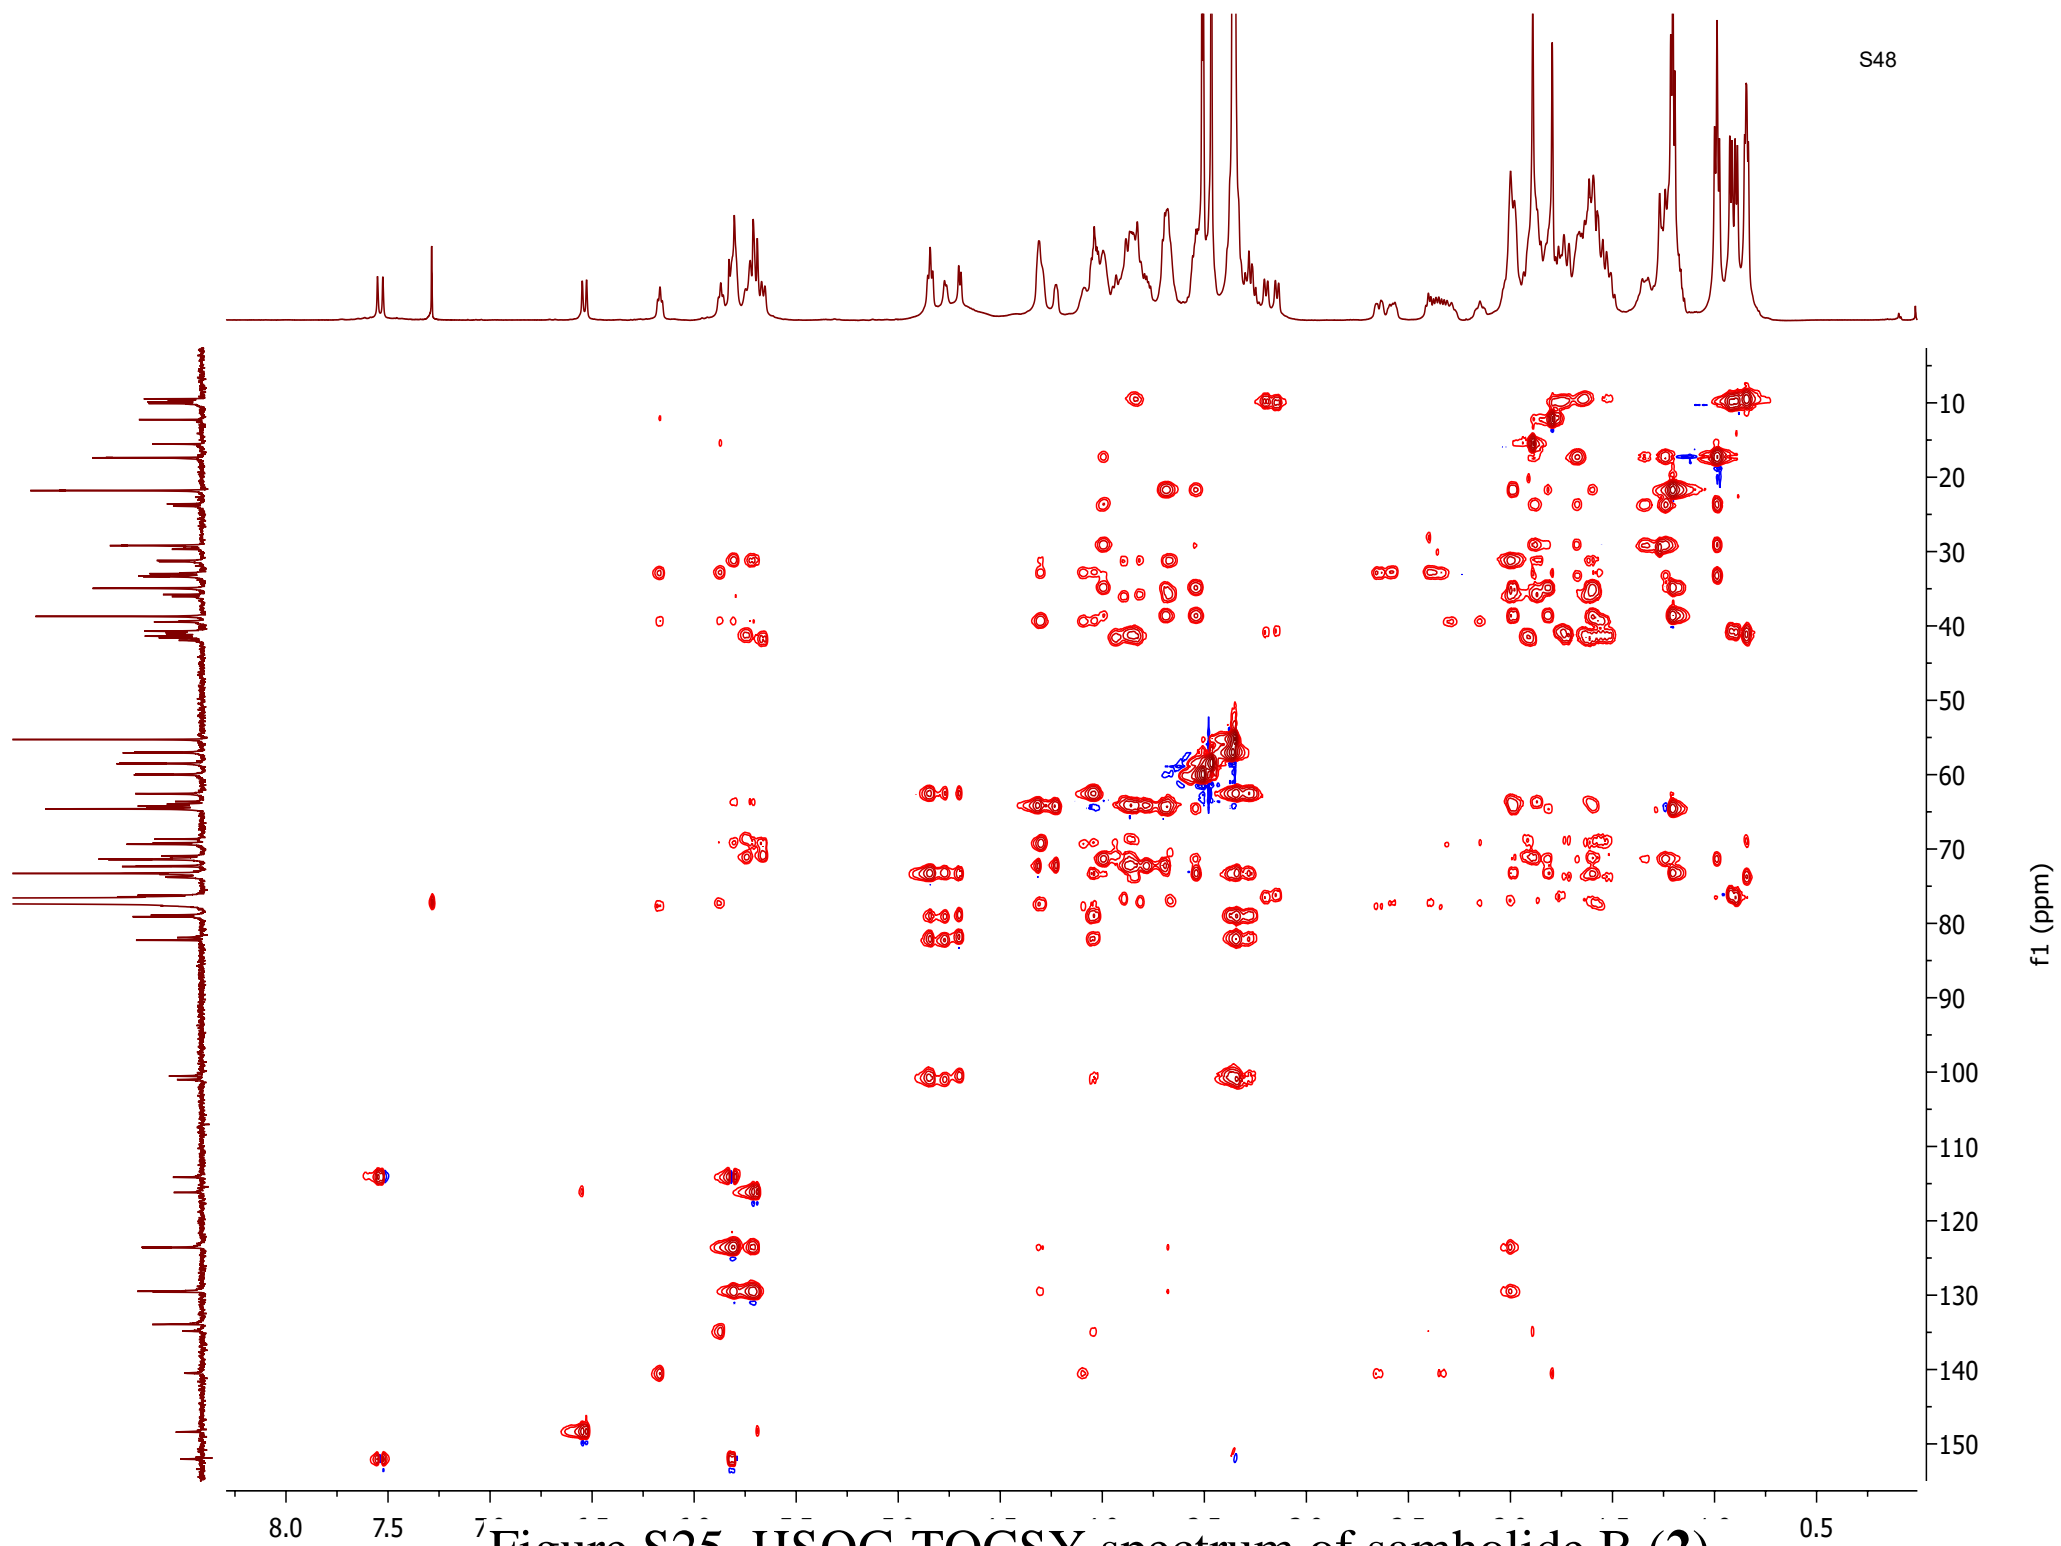



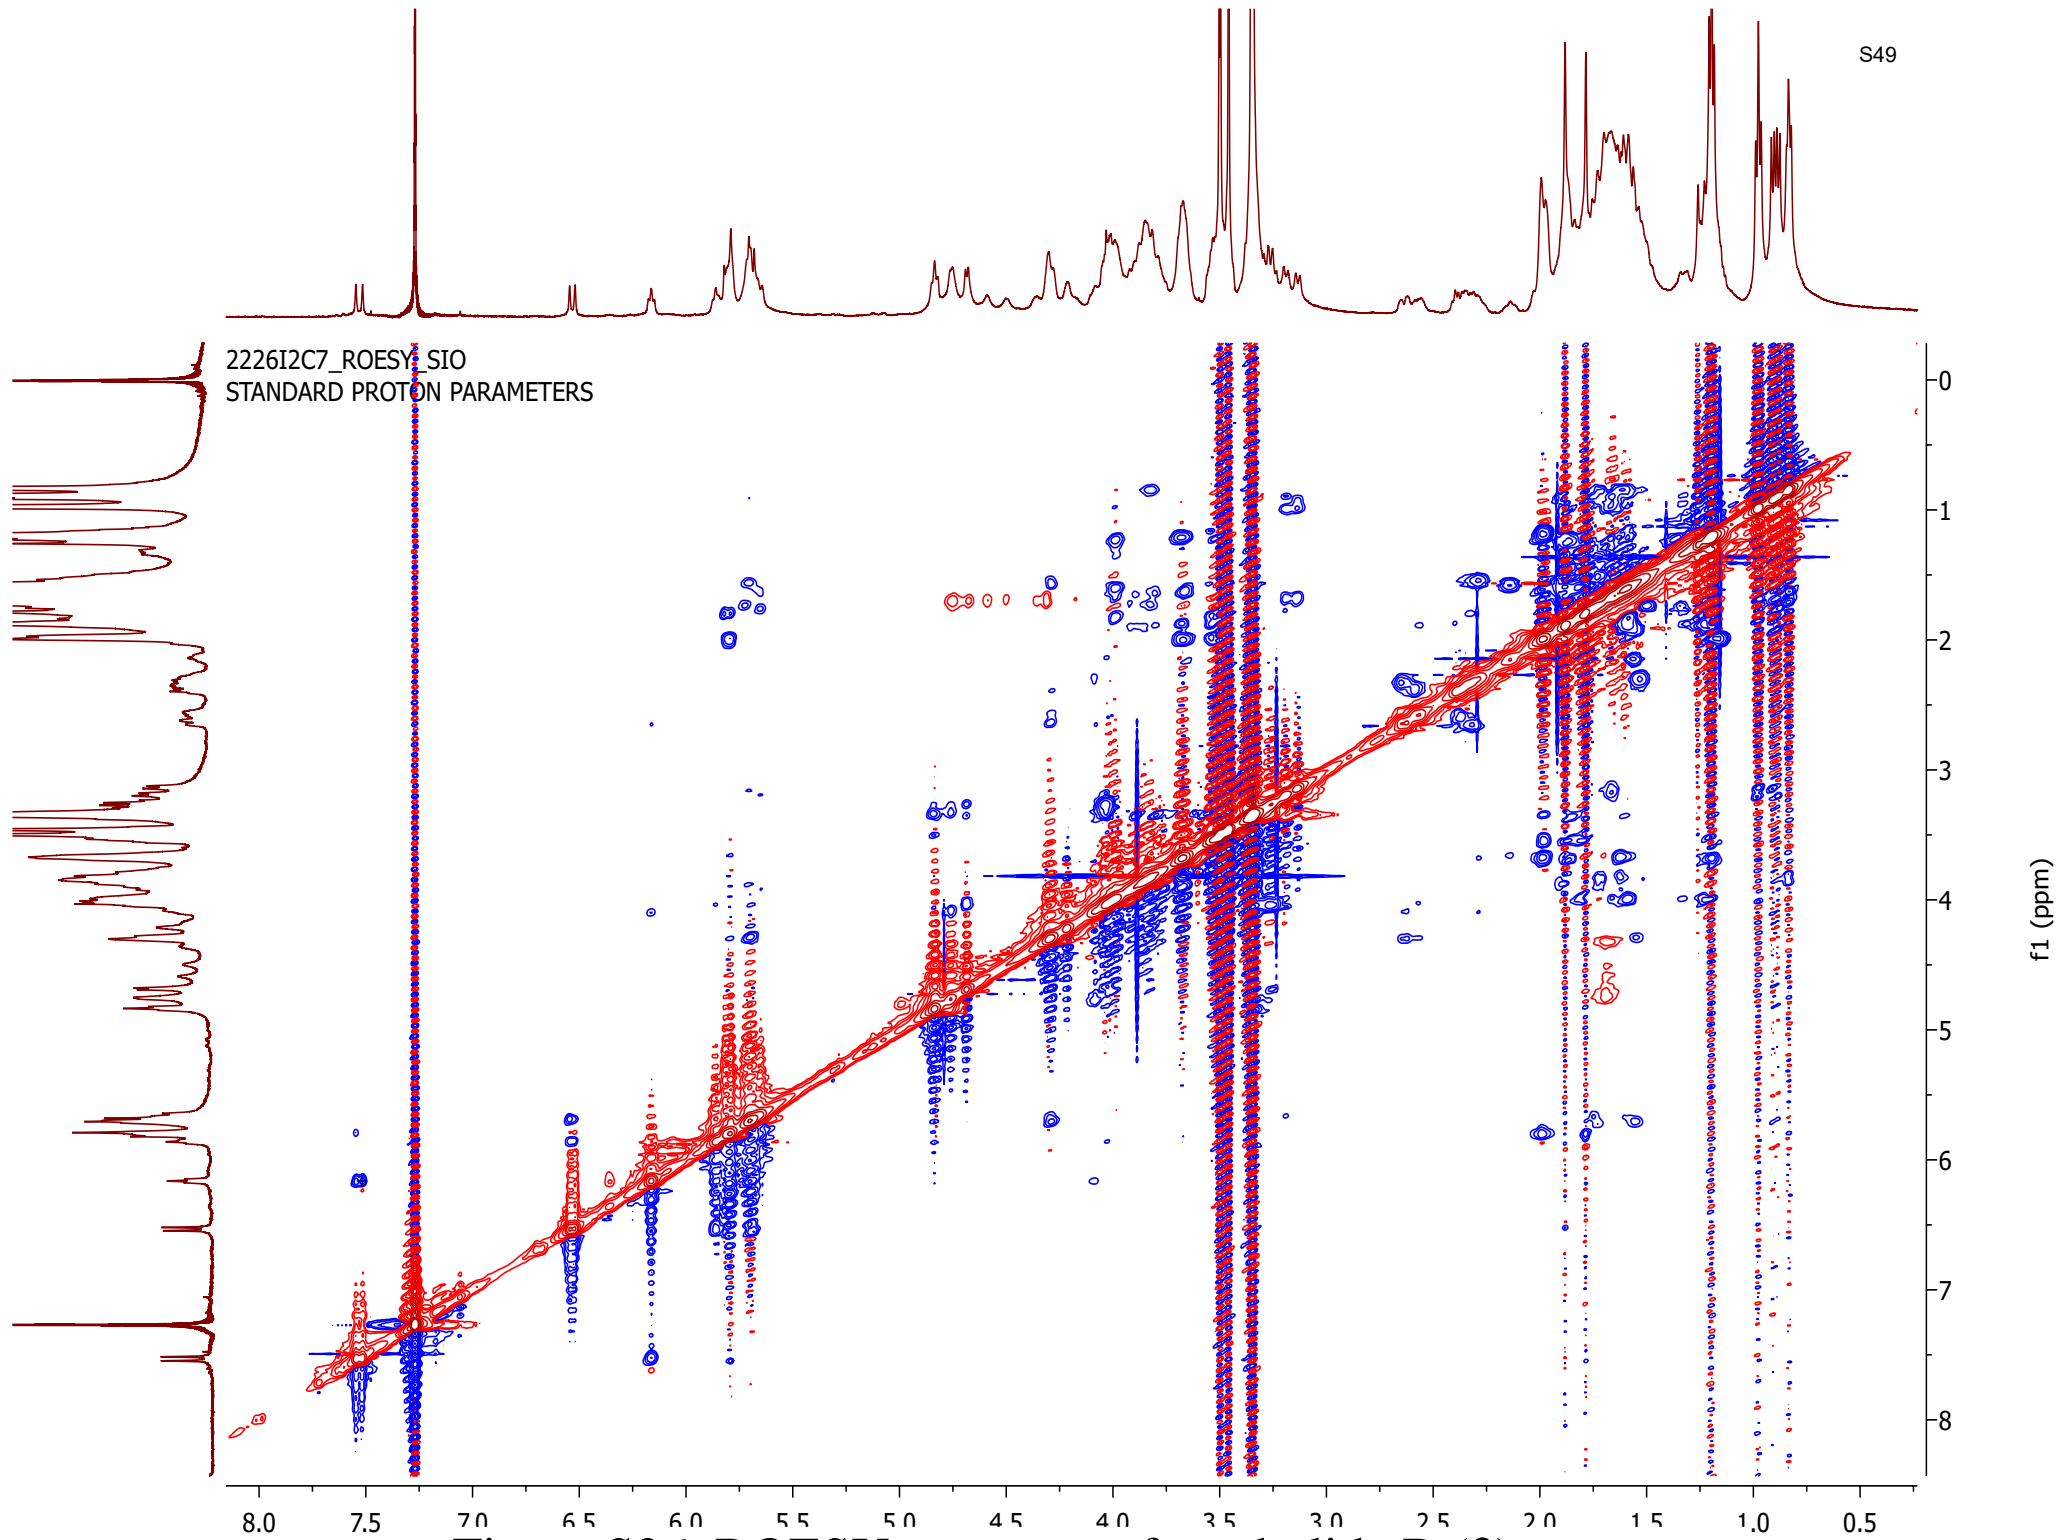

Figure S26 ROESY spectrum of samholide B (2)

F5-a #13-18 RT: 0.30-0.42 AV: 6 SB: 3 0.06-0.11 NL: 4.11E7  
T: + c Full ms [ 300.00-2000.00]

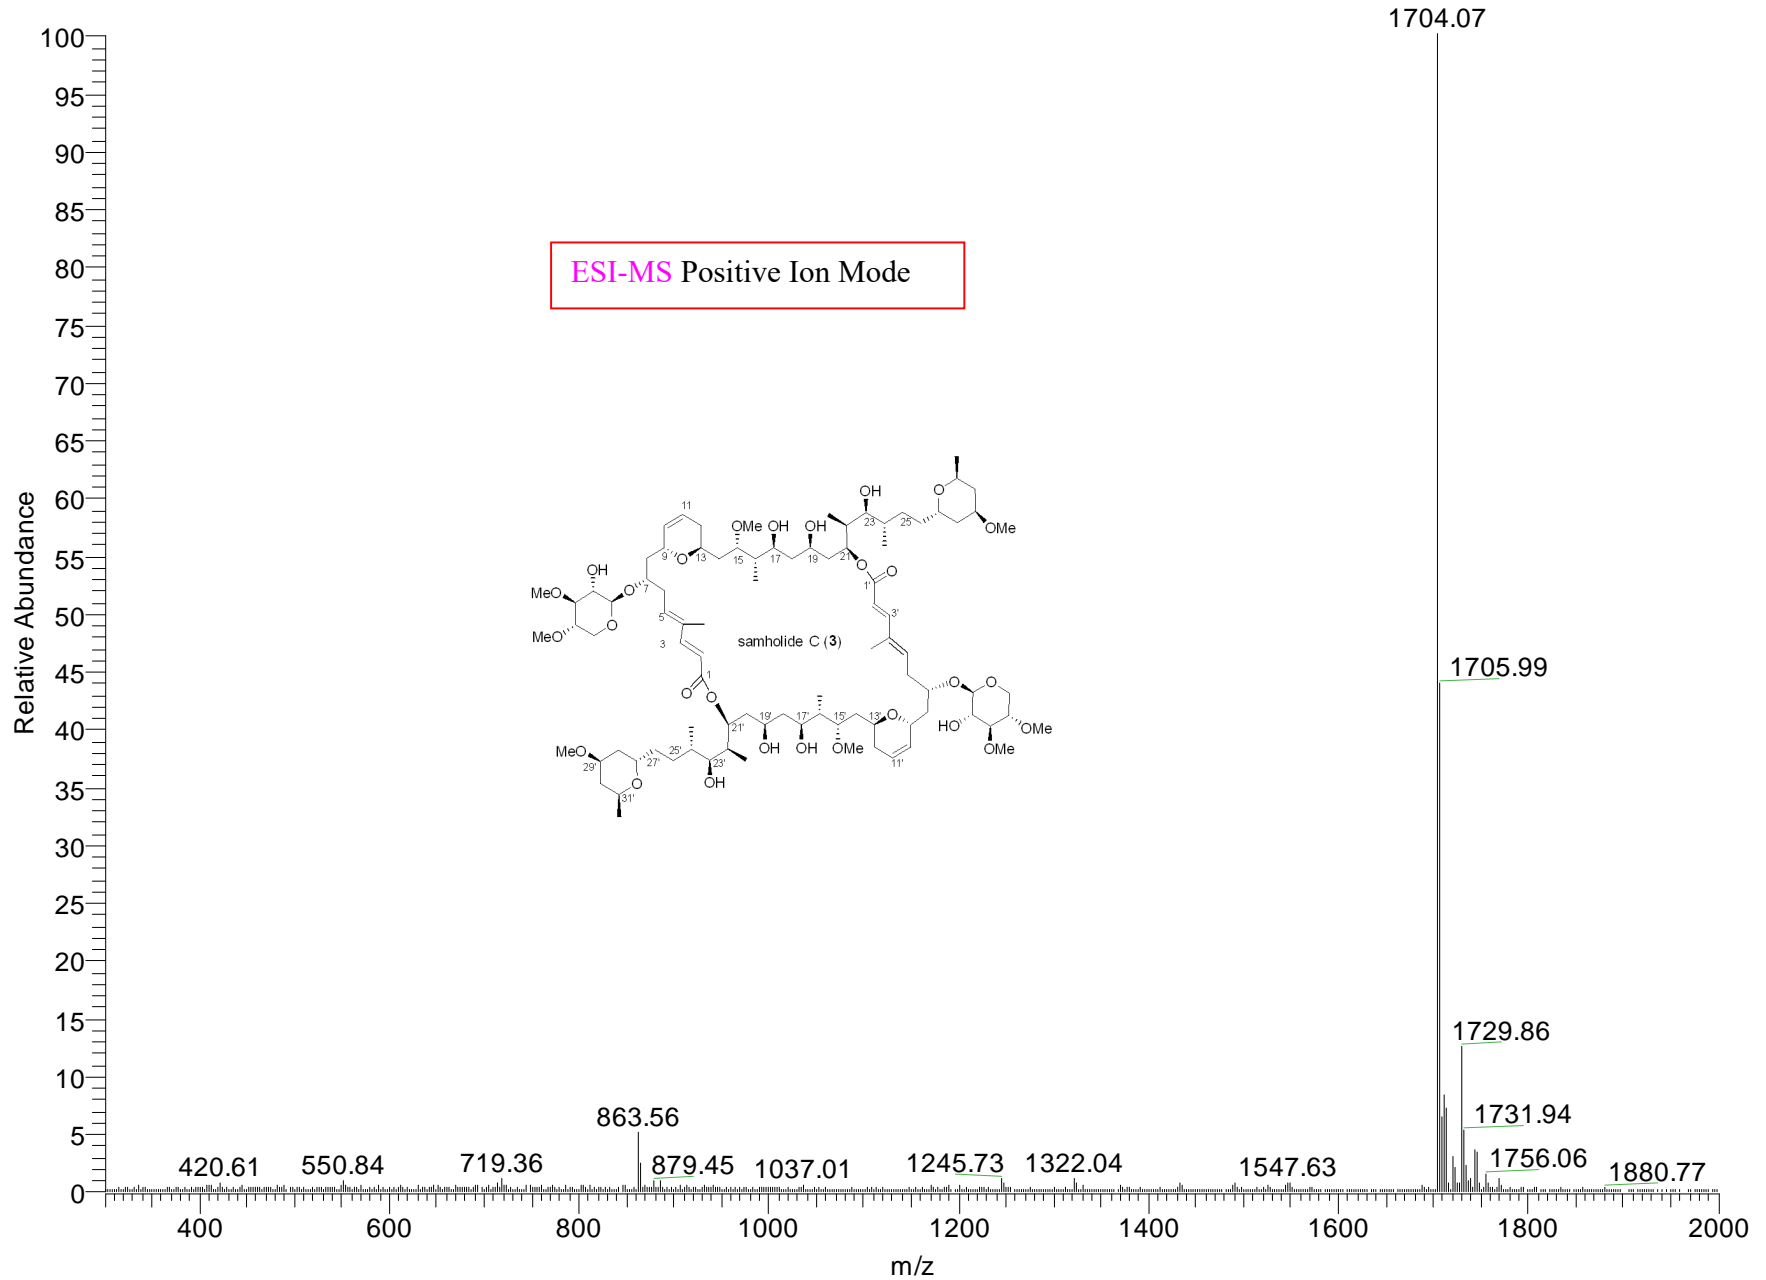

Figure S27 The ESI MS spectrum of samholide C (3)

F5-a #51-56 RT: 1.10-1.18 AV: 6 SB: 5 0.93-1.01 NL: 3.45E7  
T: + c Full ms2 1704.00@35.00 [465.00-2000.00]

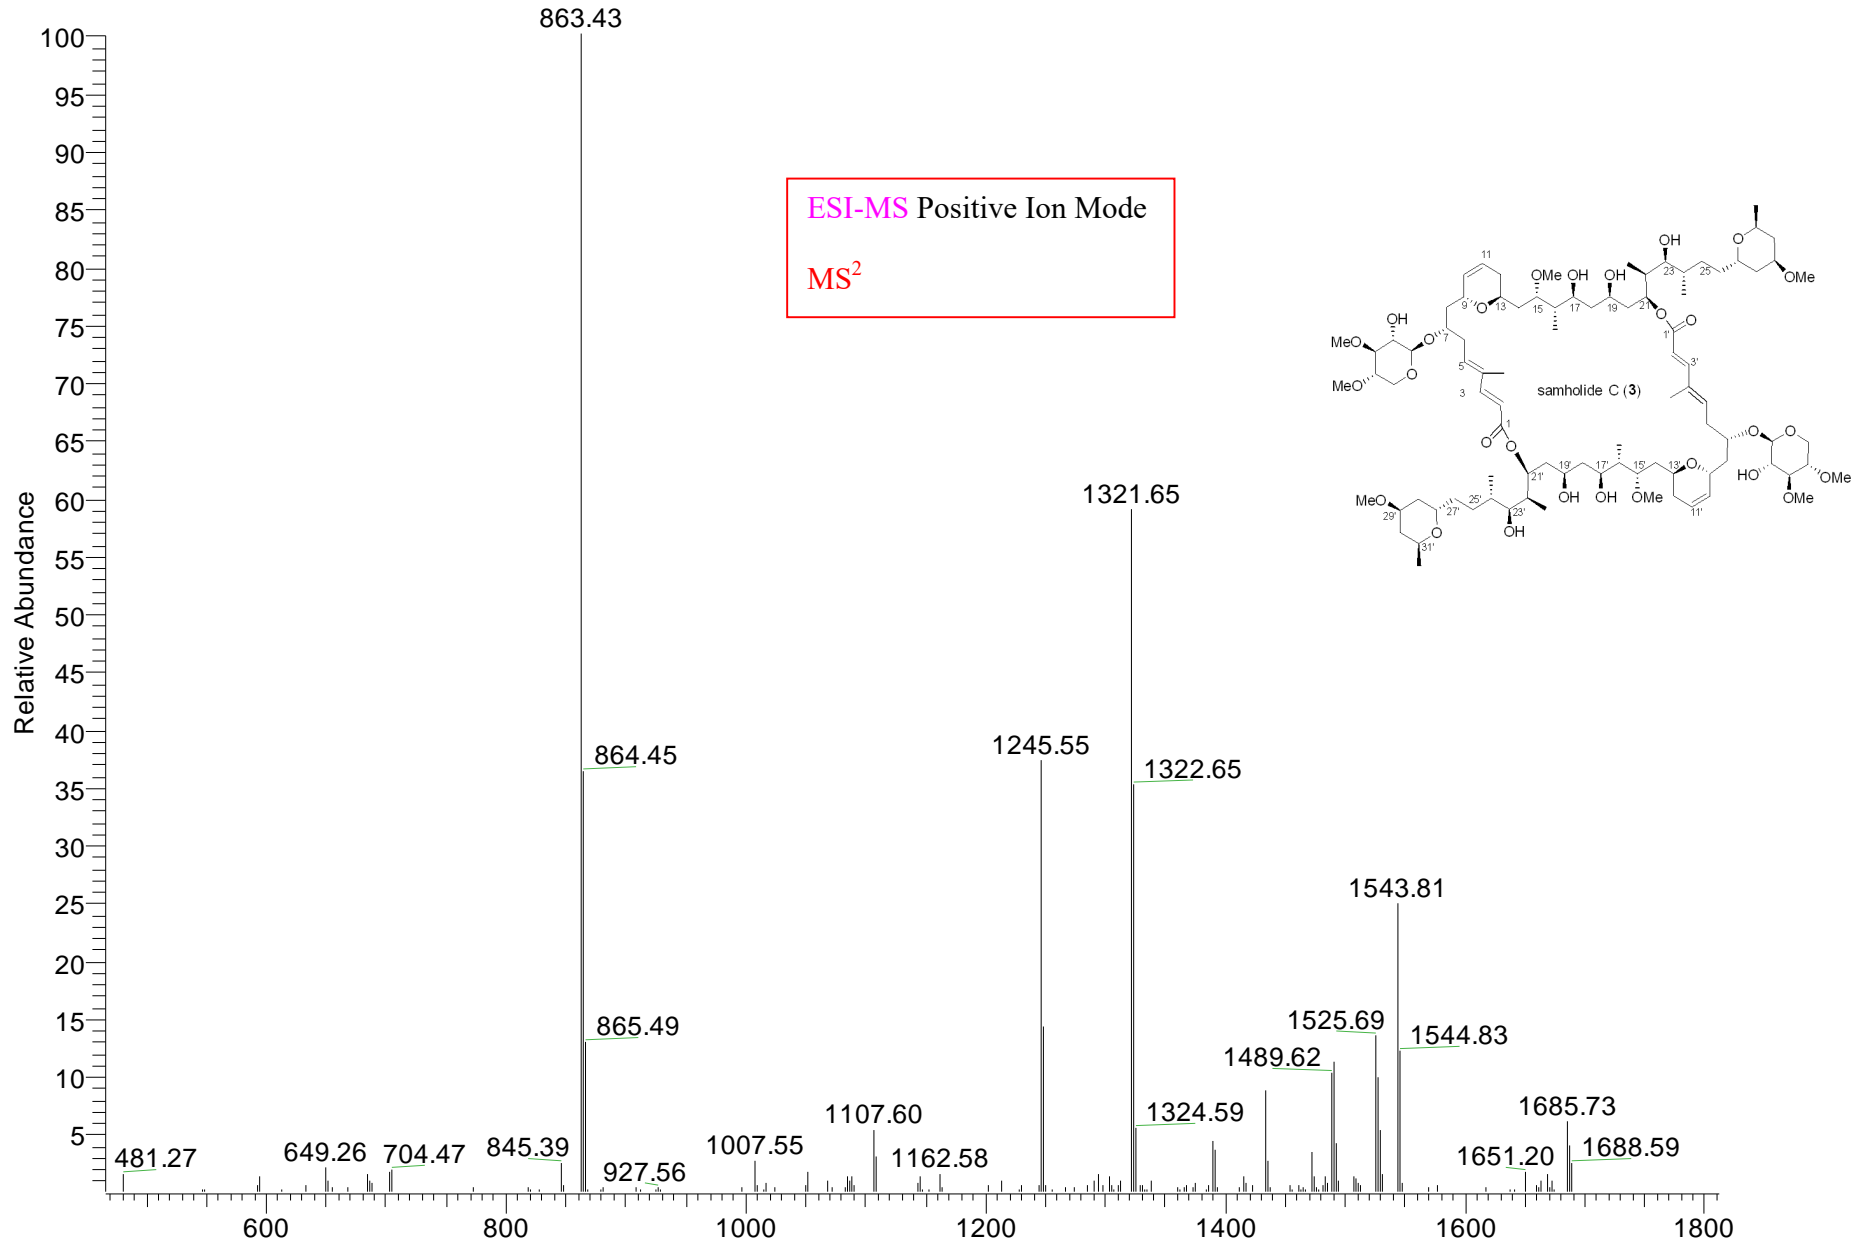

Figure S28 The ESI MS<sup>2</sup> spectrum of samholide C (3)

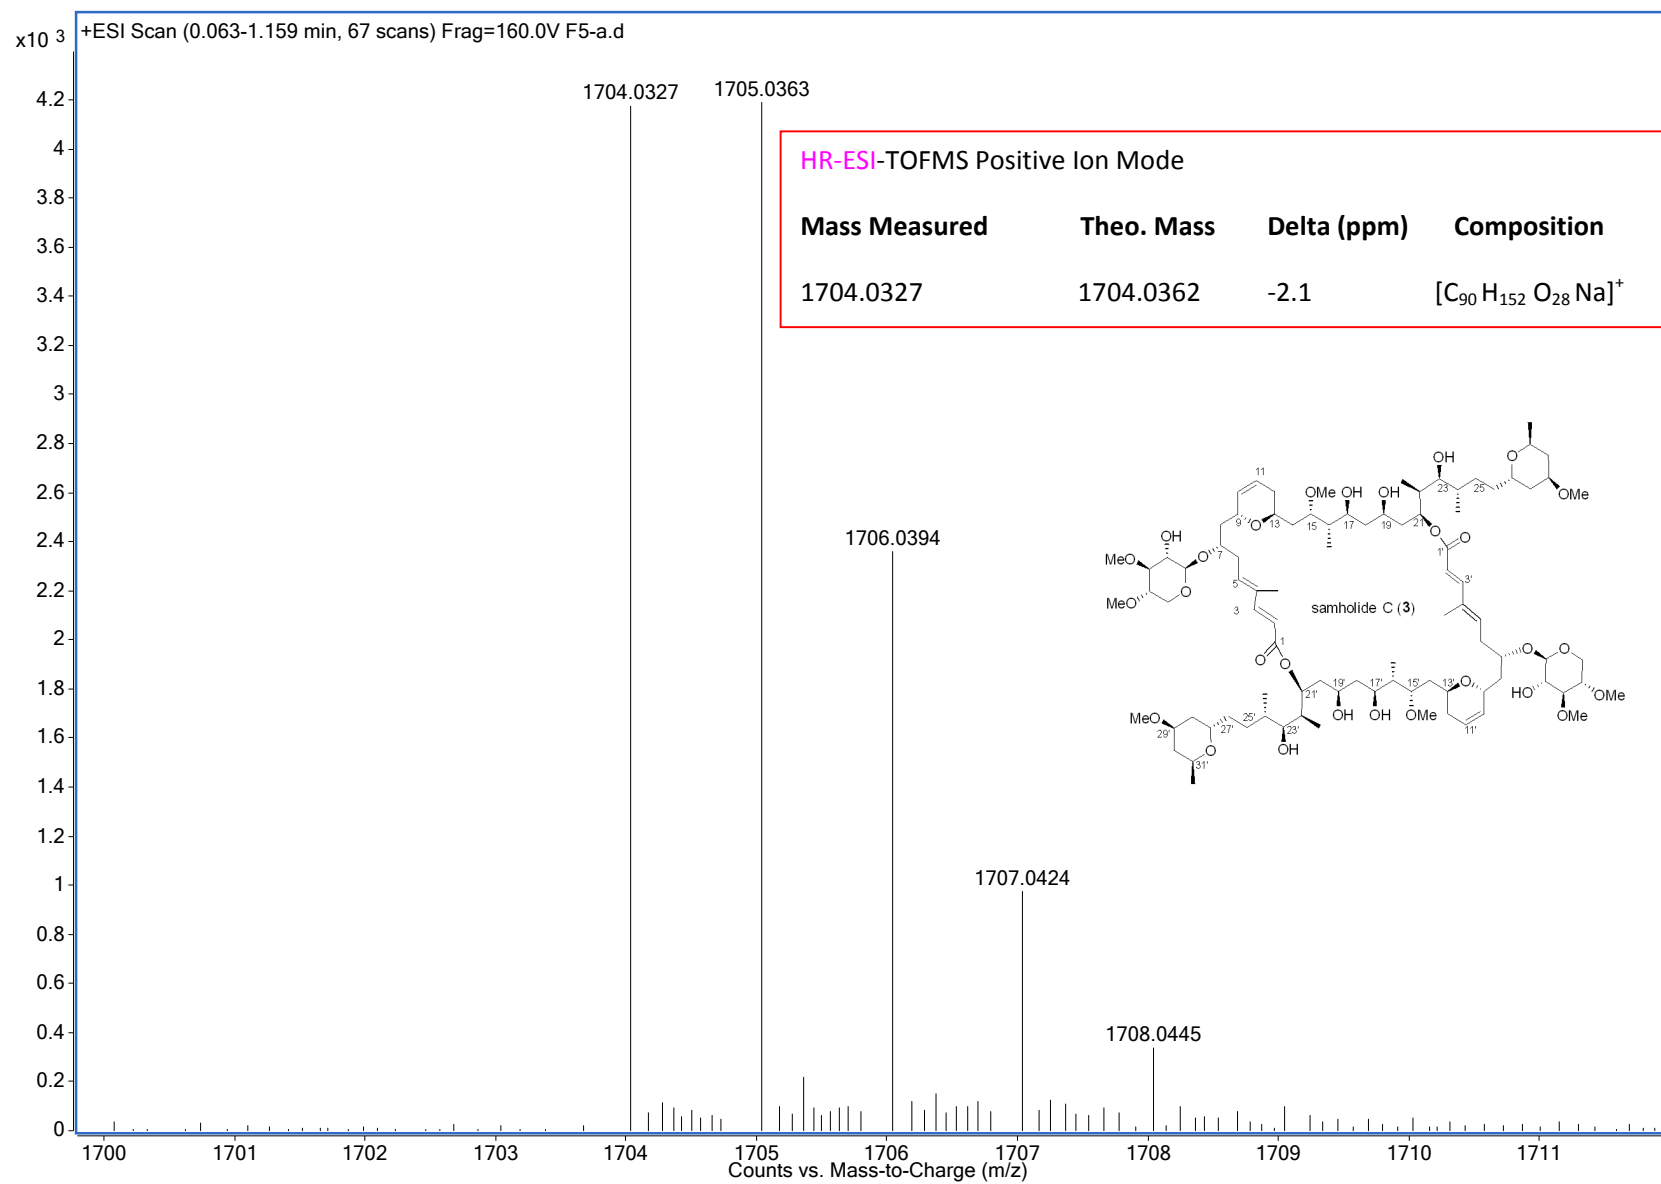

Figure S29 The positive HRESIMS spectrum of samholide C (3)

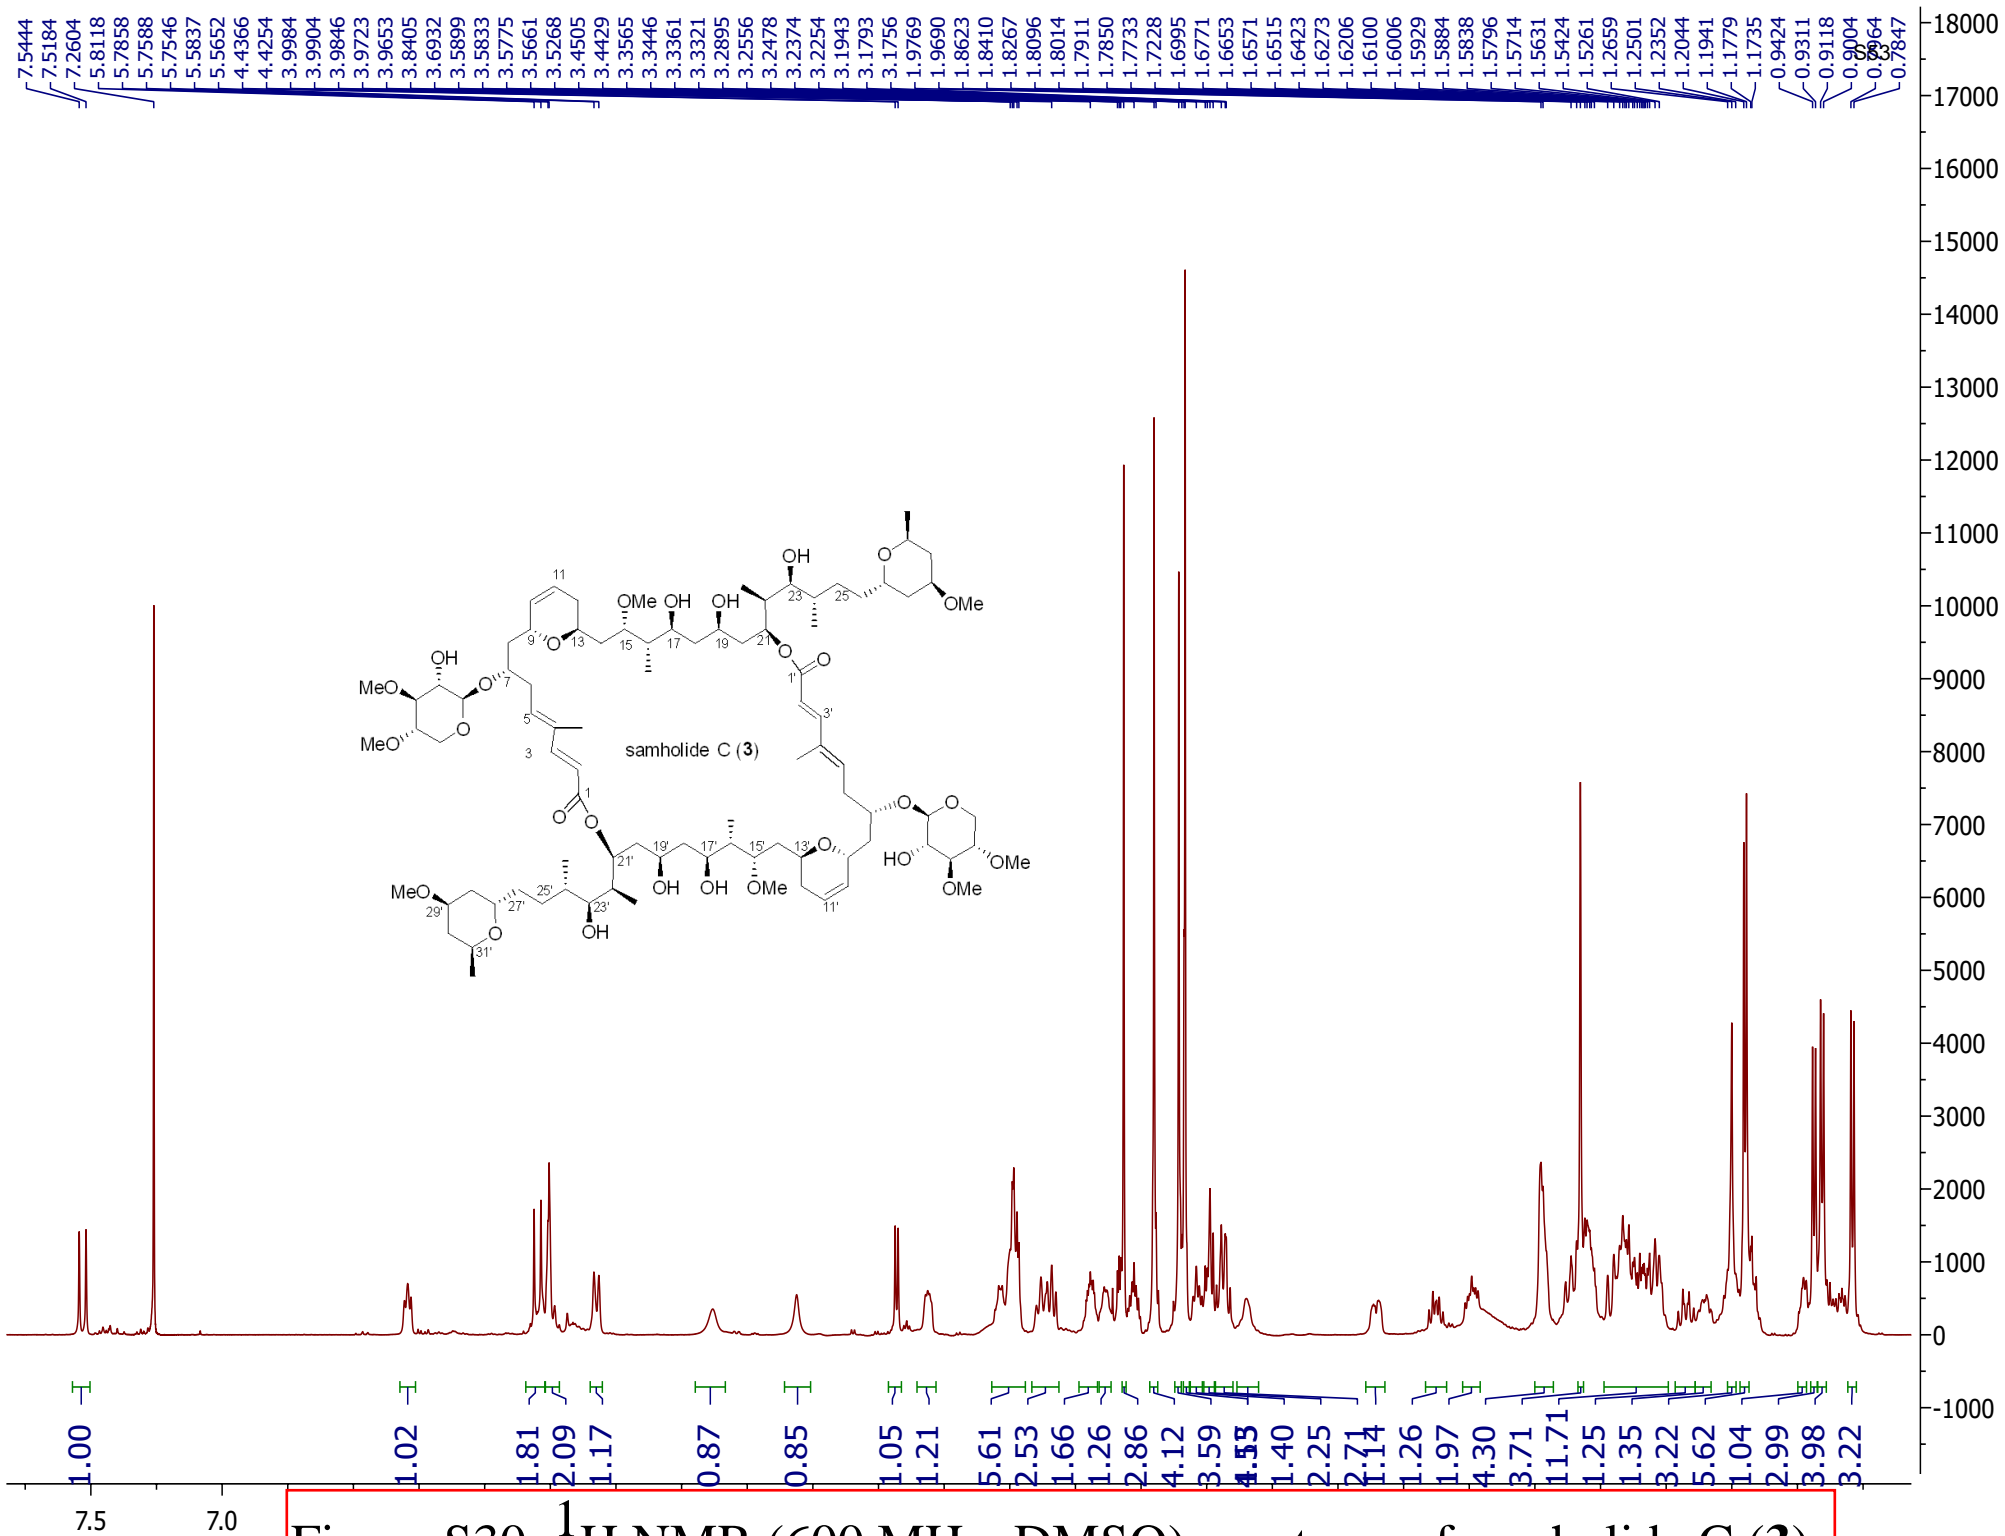

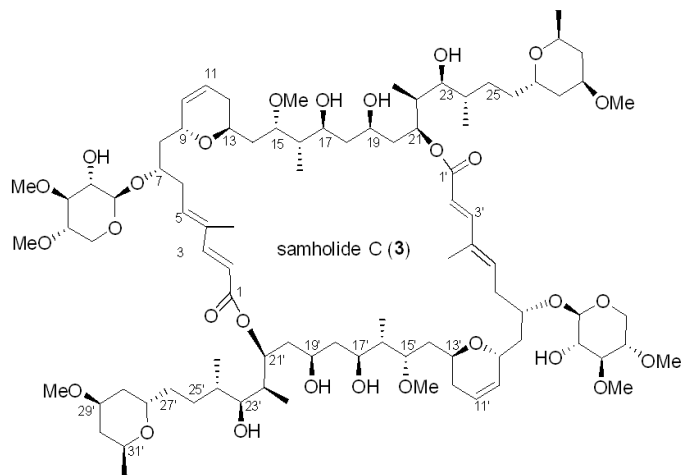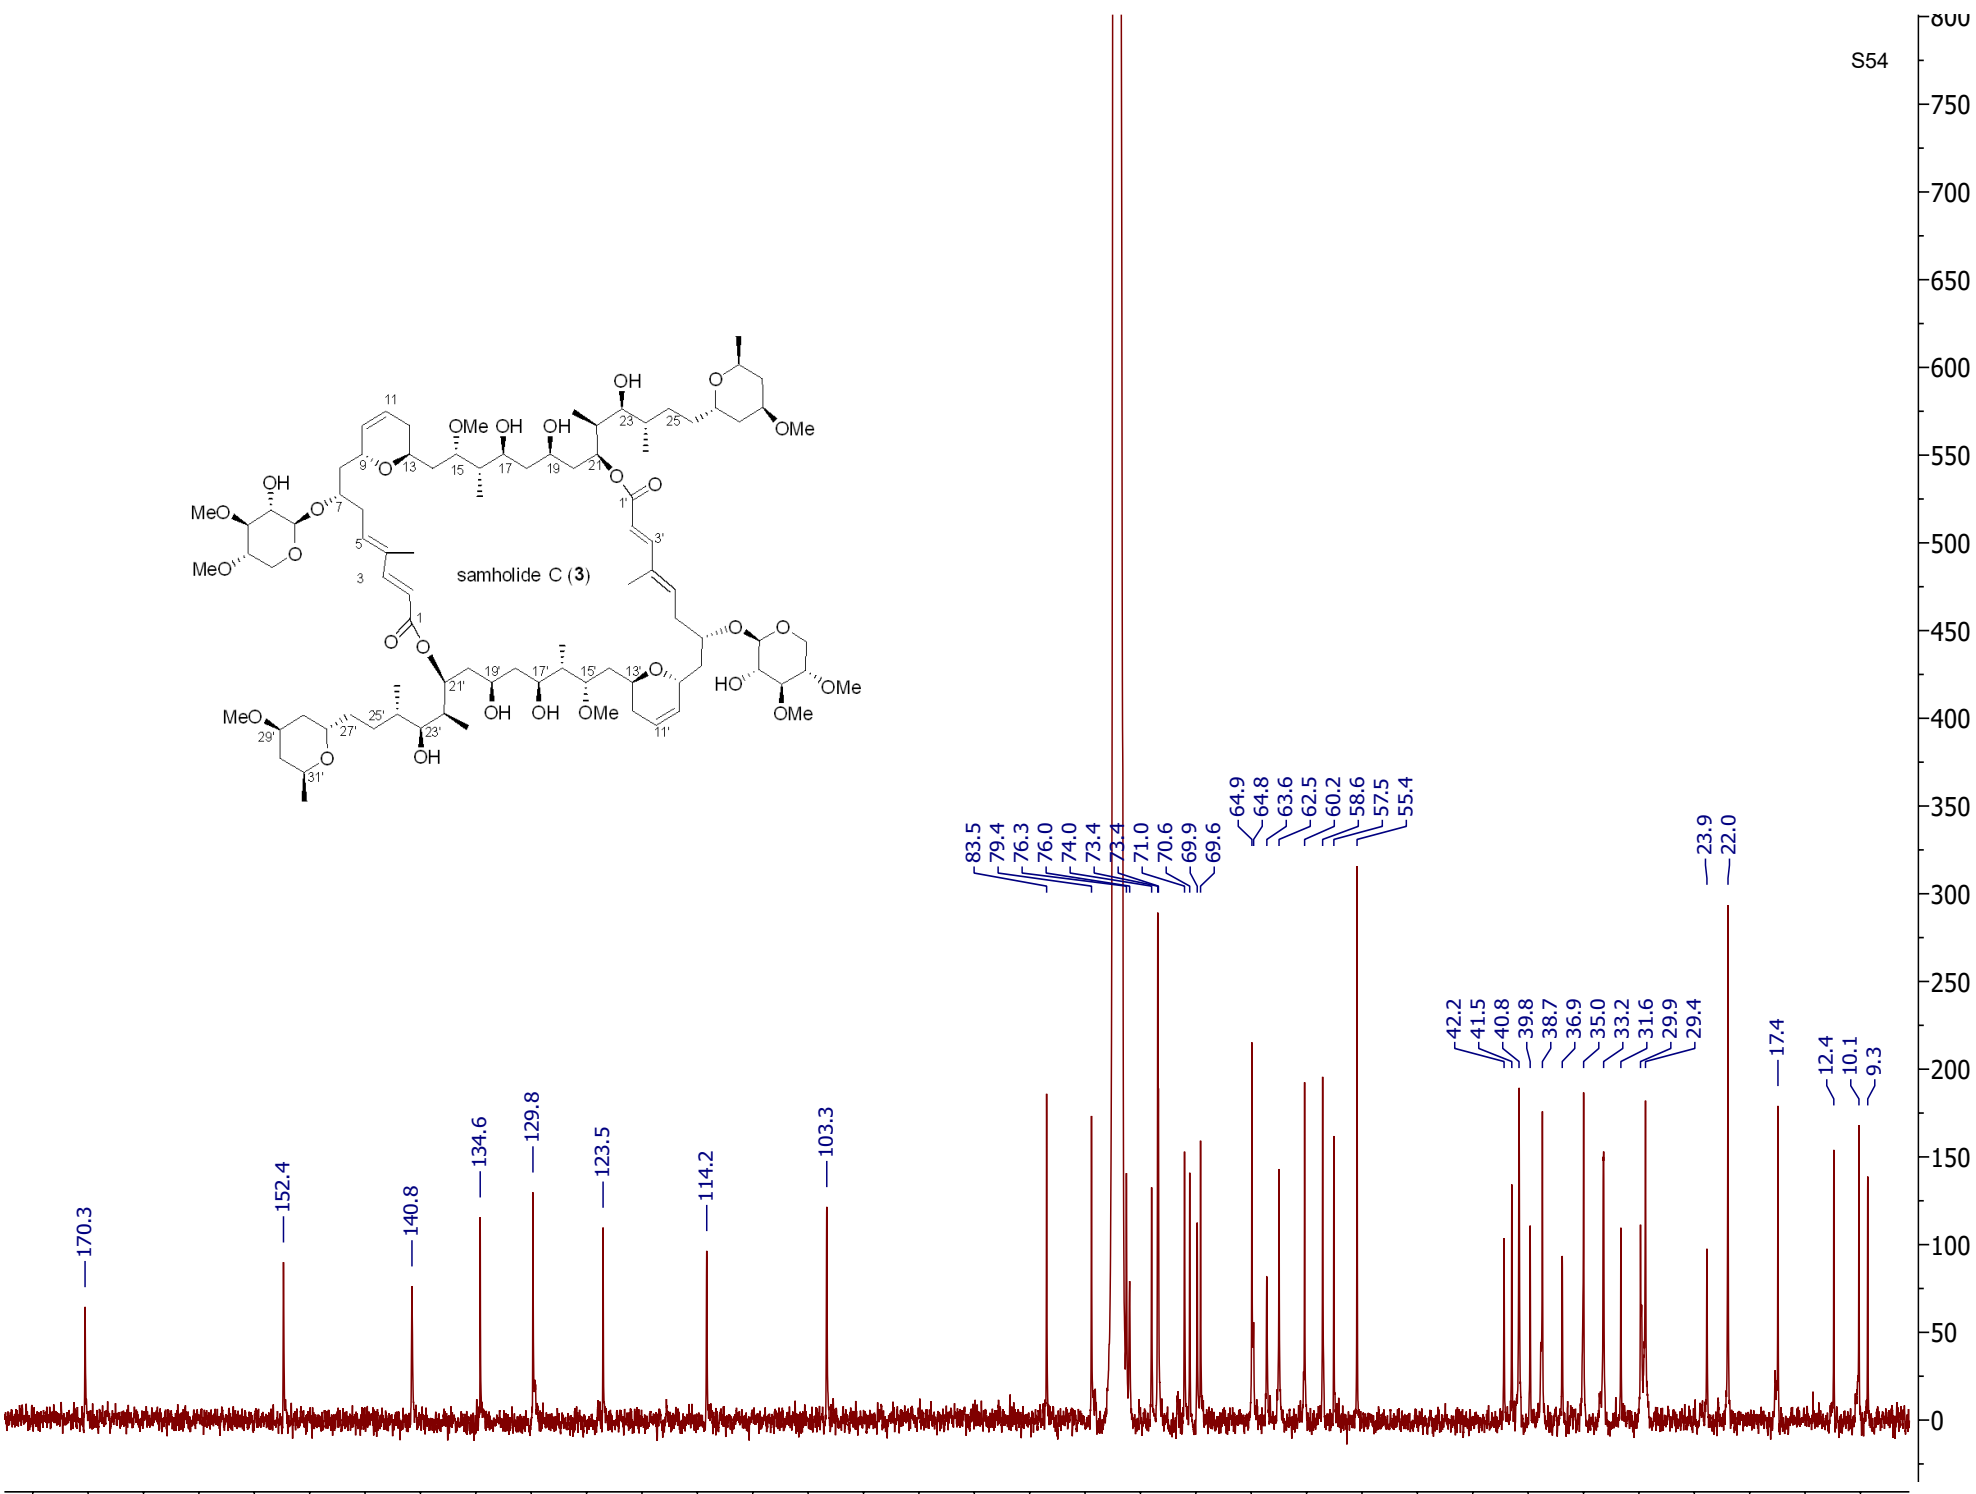

Figure S31  $^{13}\text{C}$  NMR (150 MHz, DMSO) spectrum of samholide C (3)

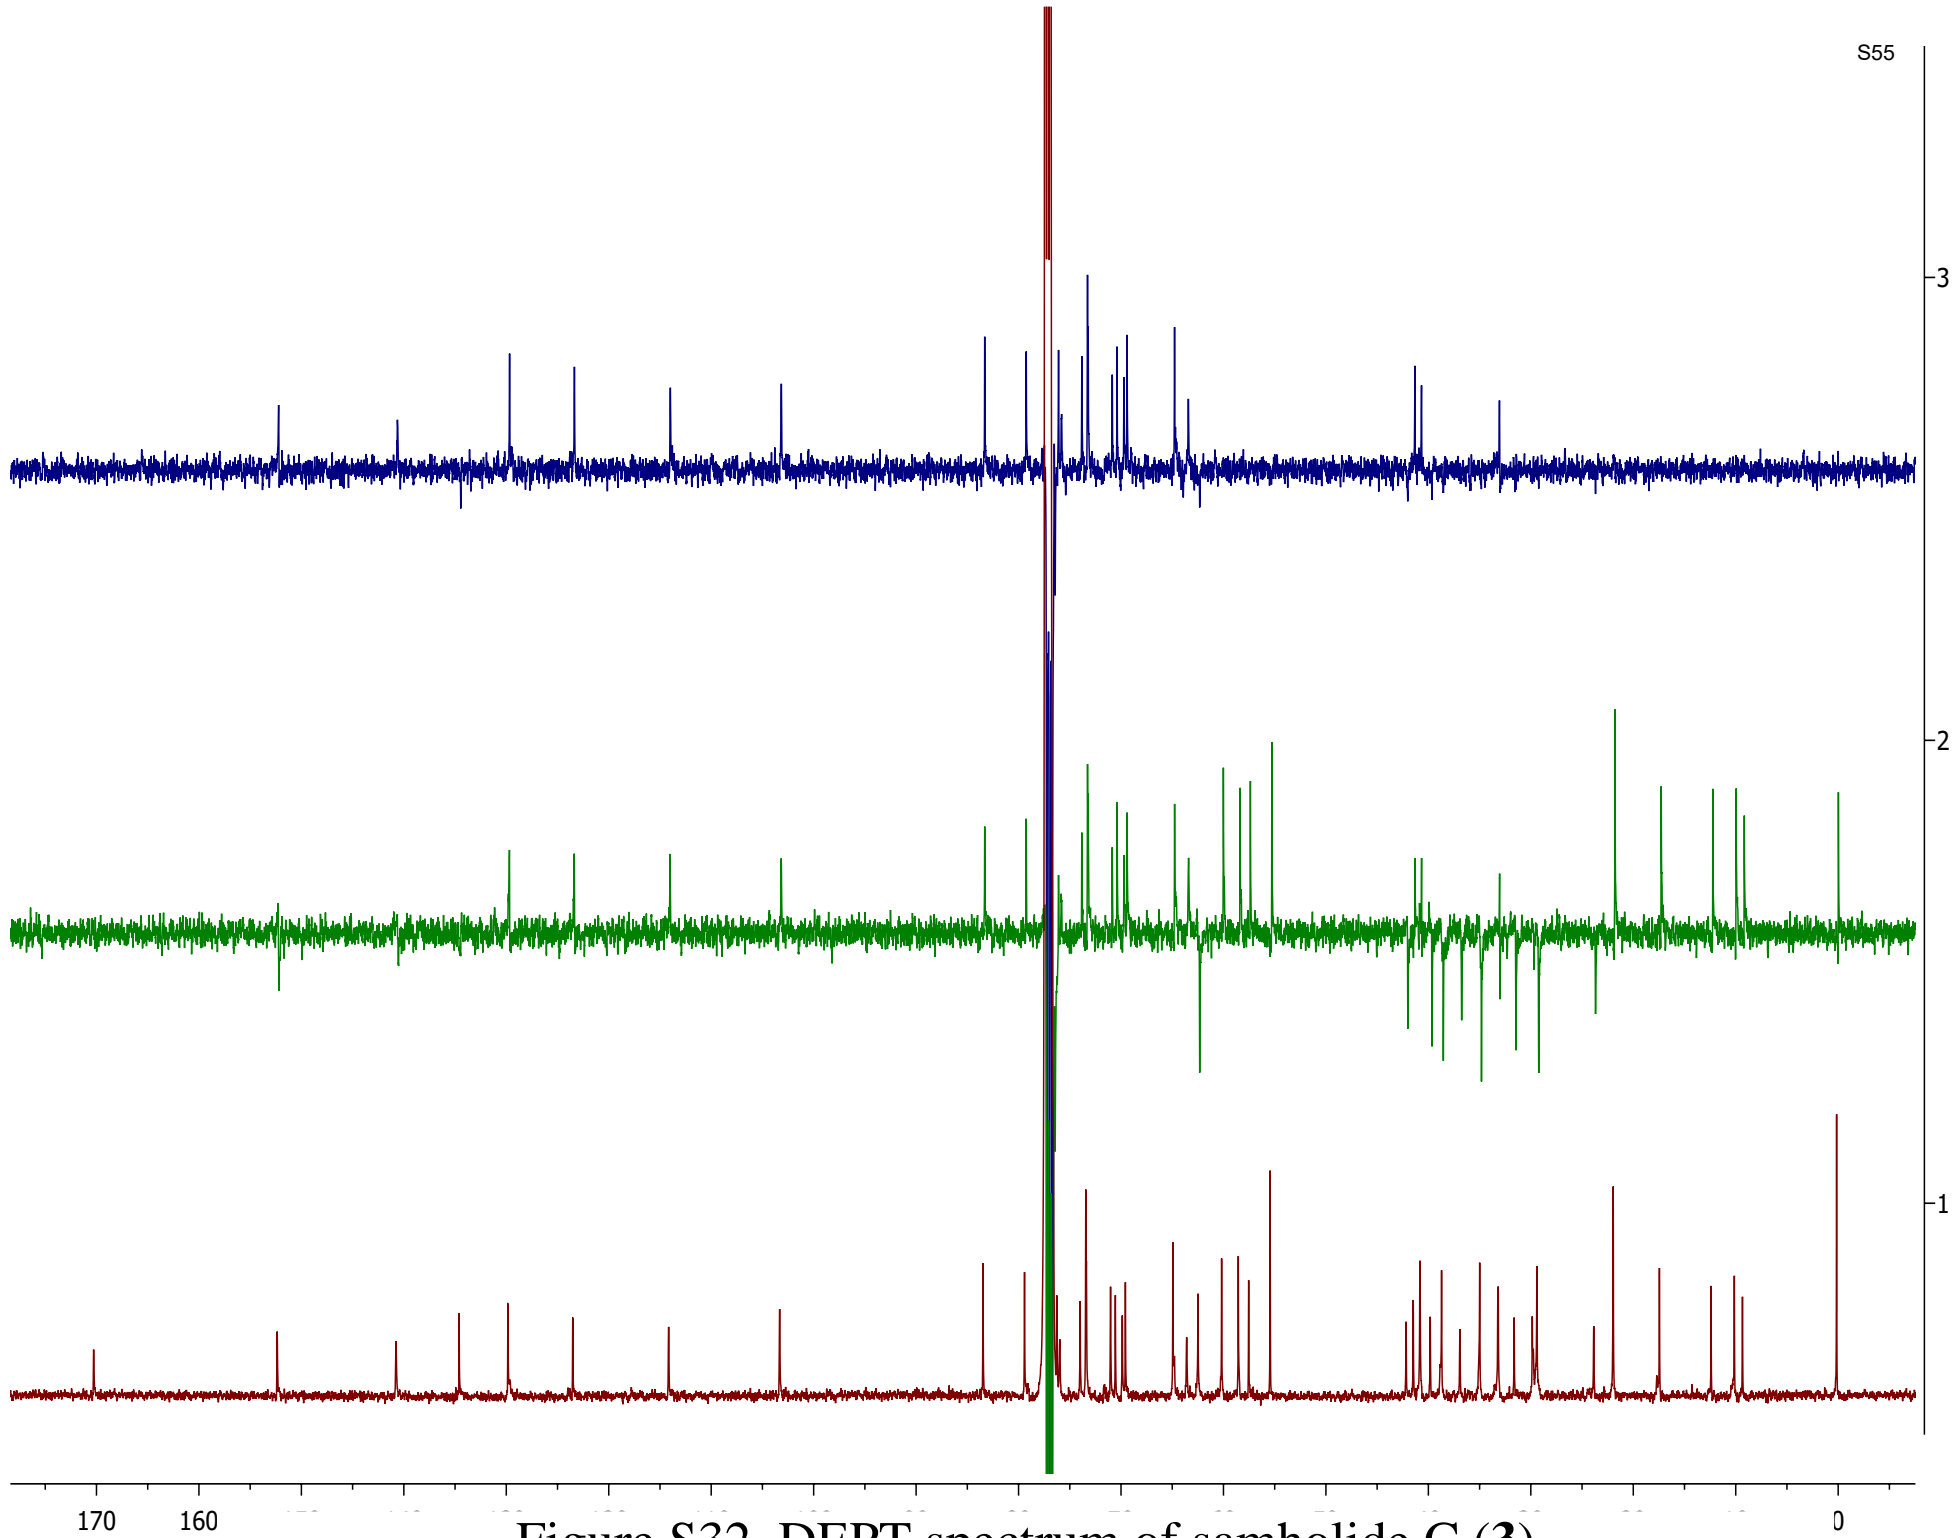

Figure S32 DEPT spectrum of samholide C (**3**)

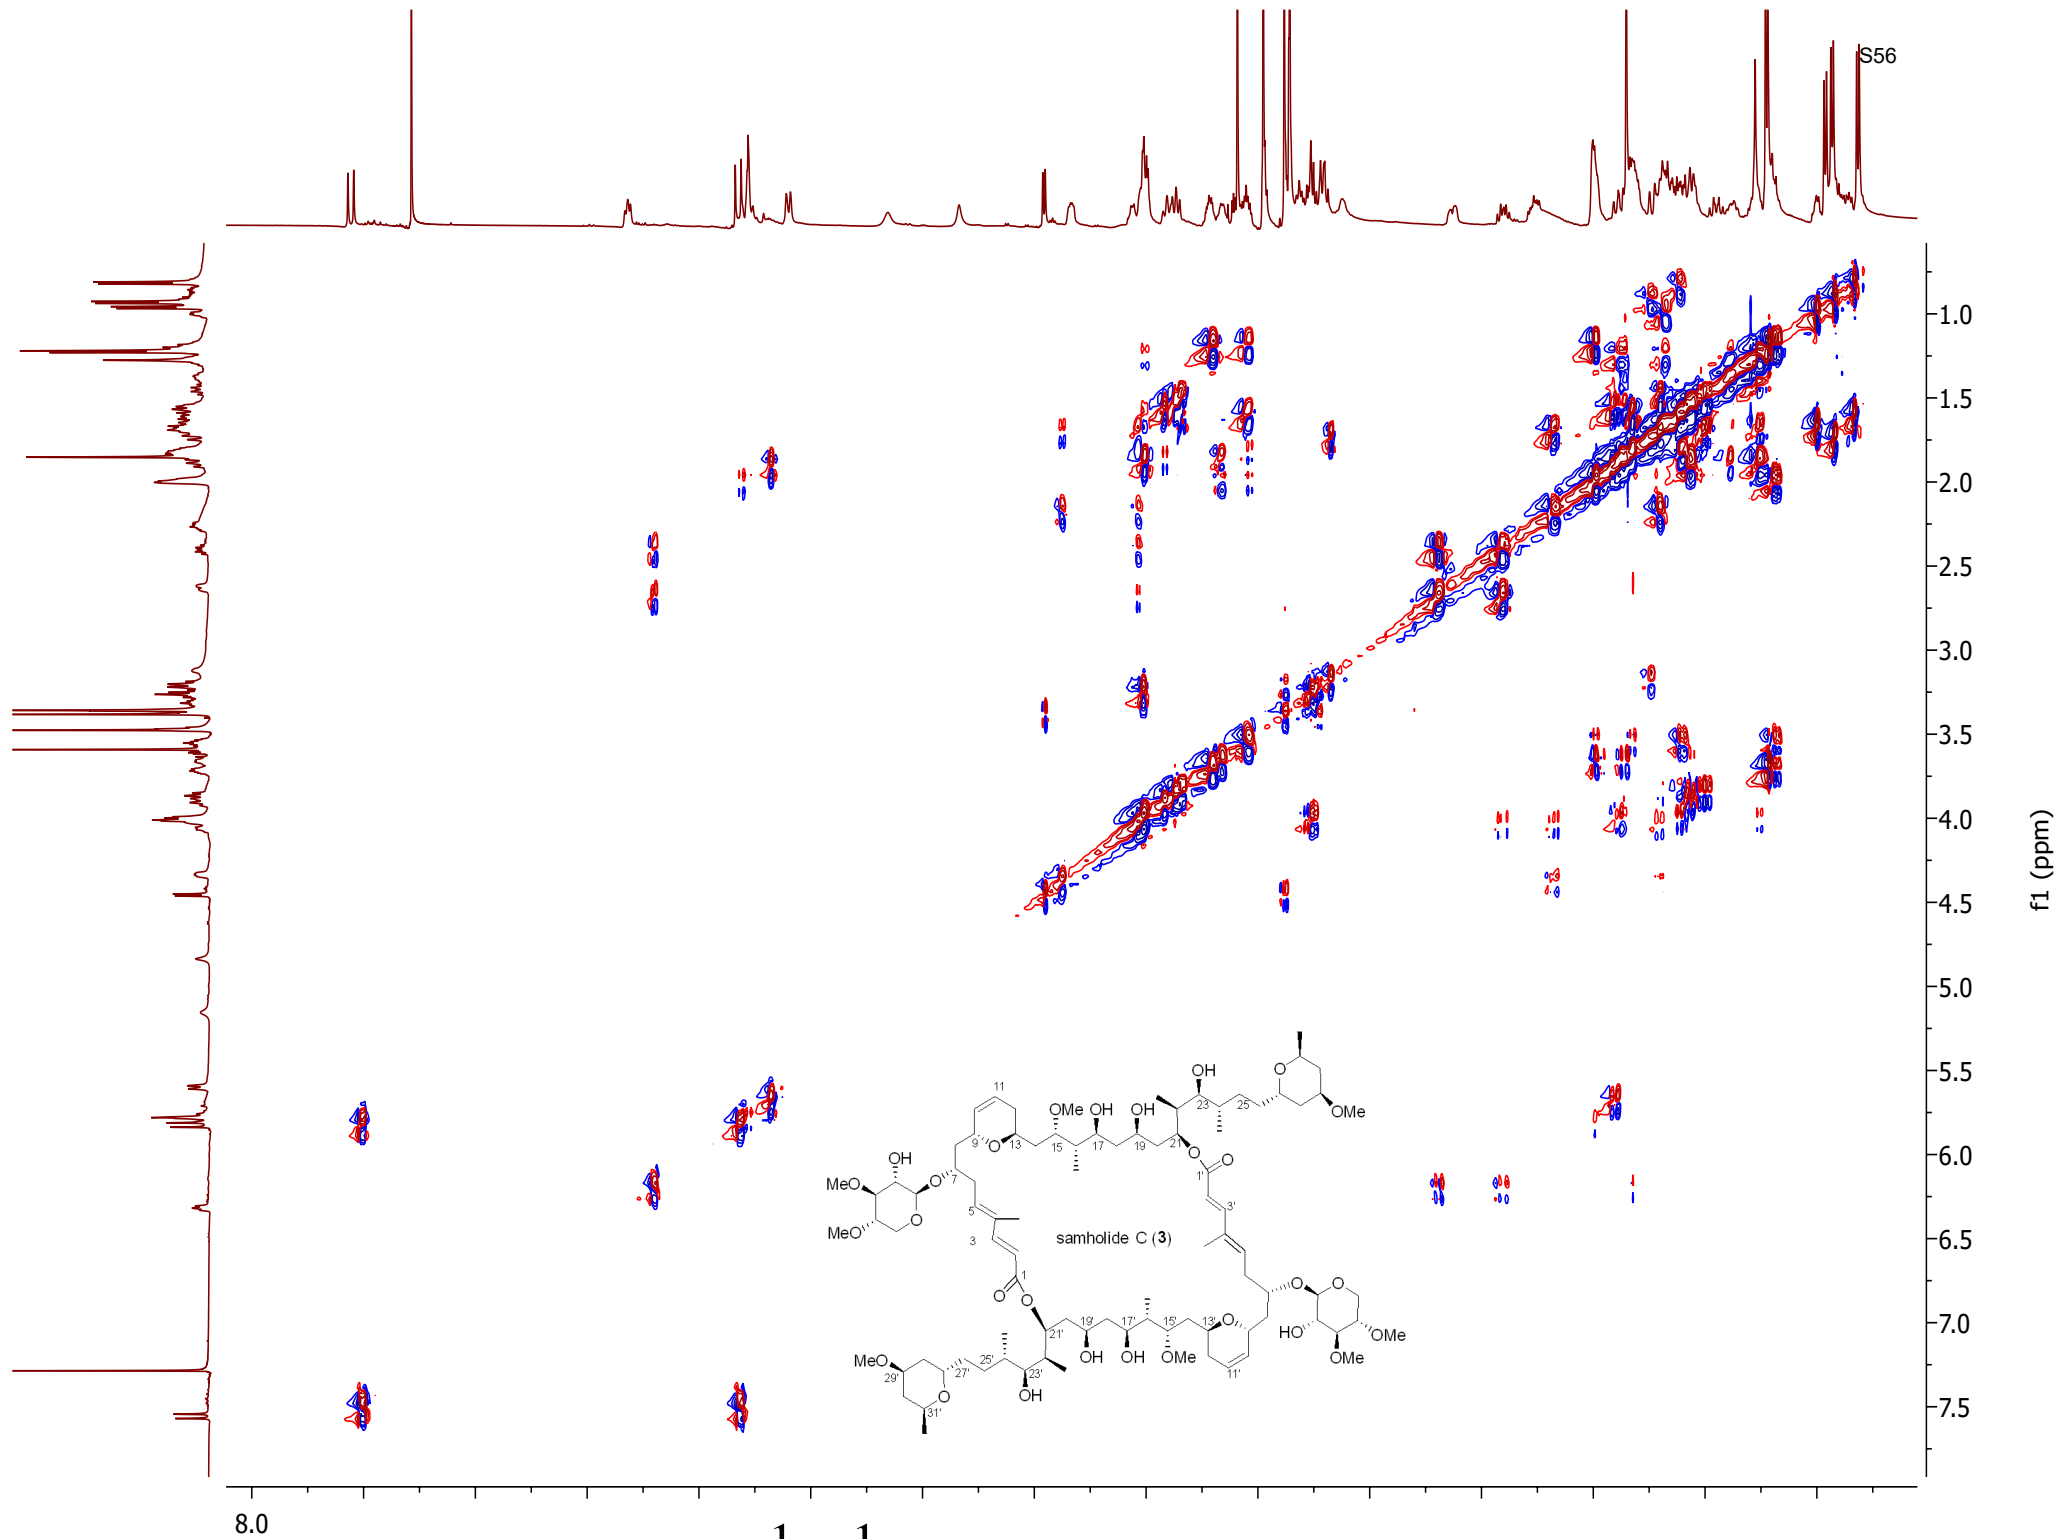



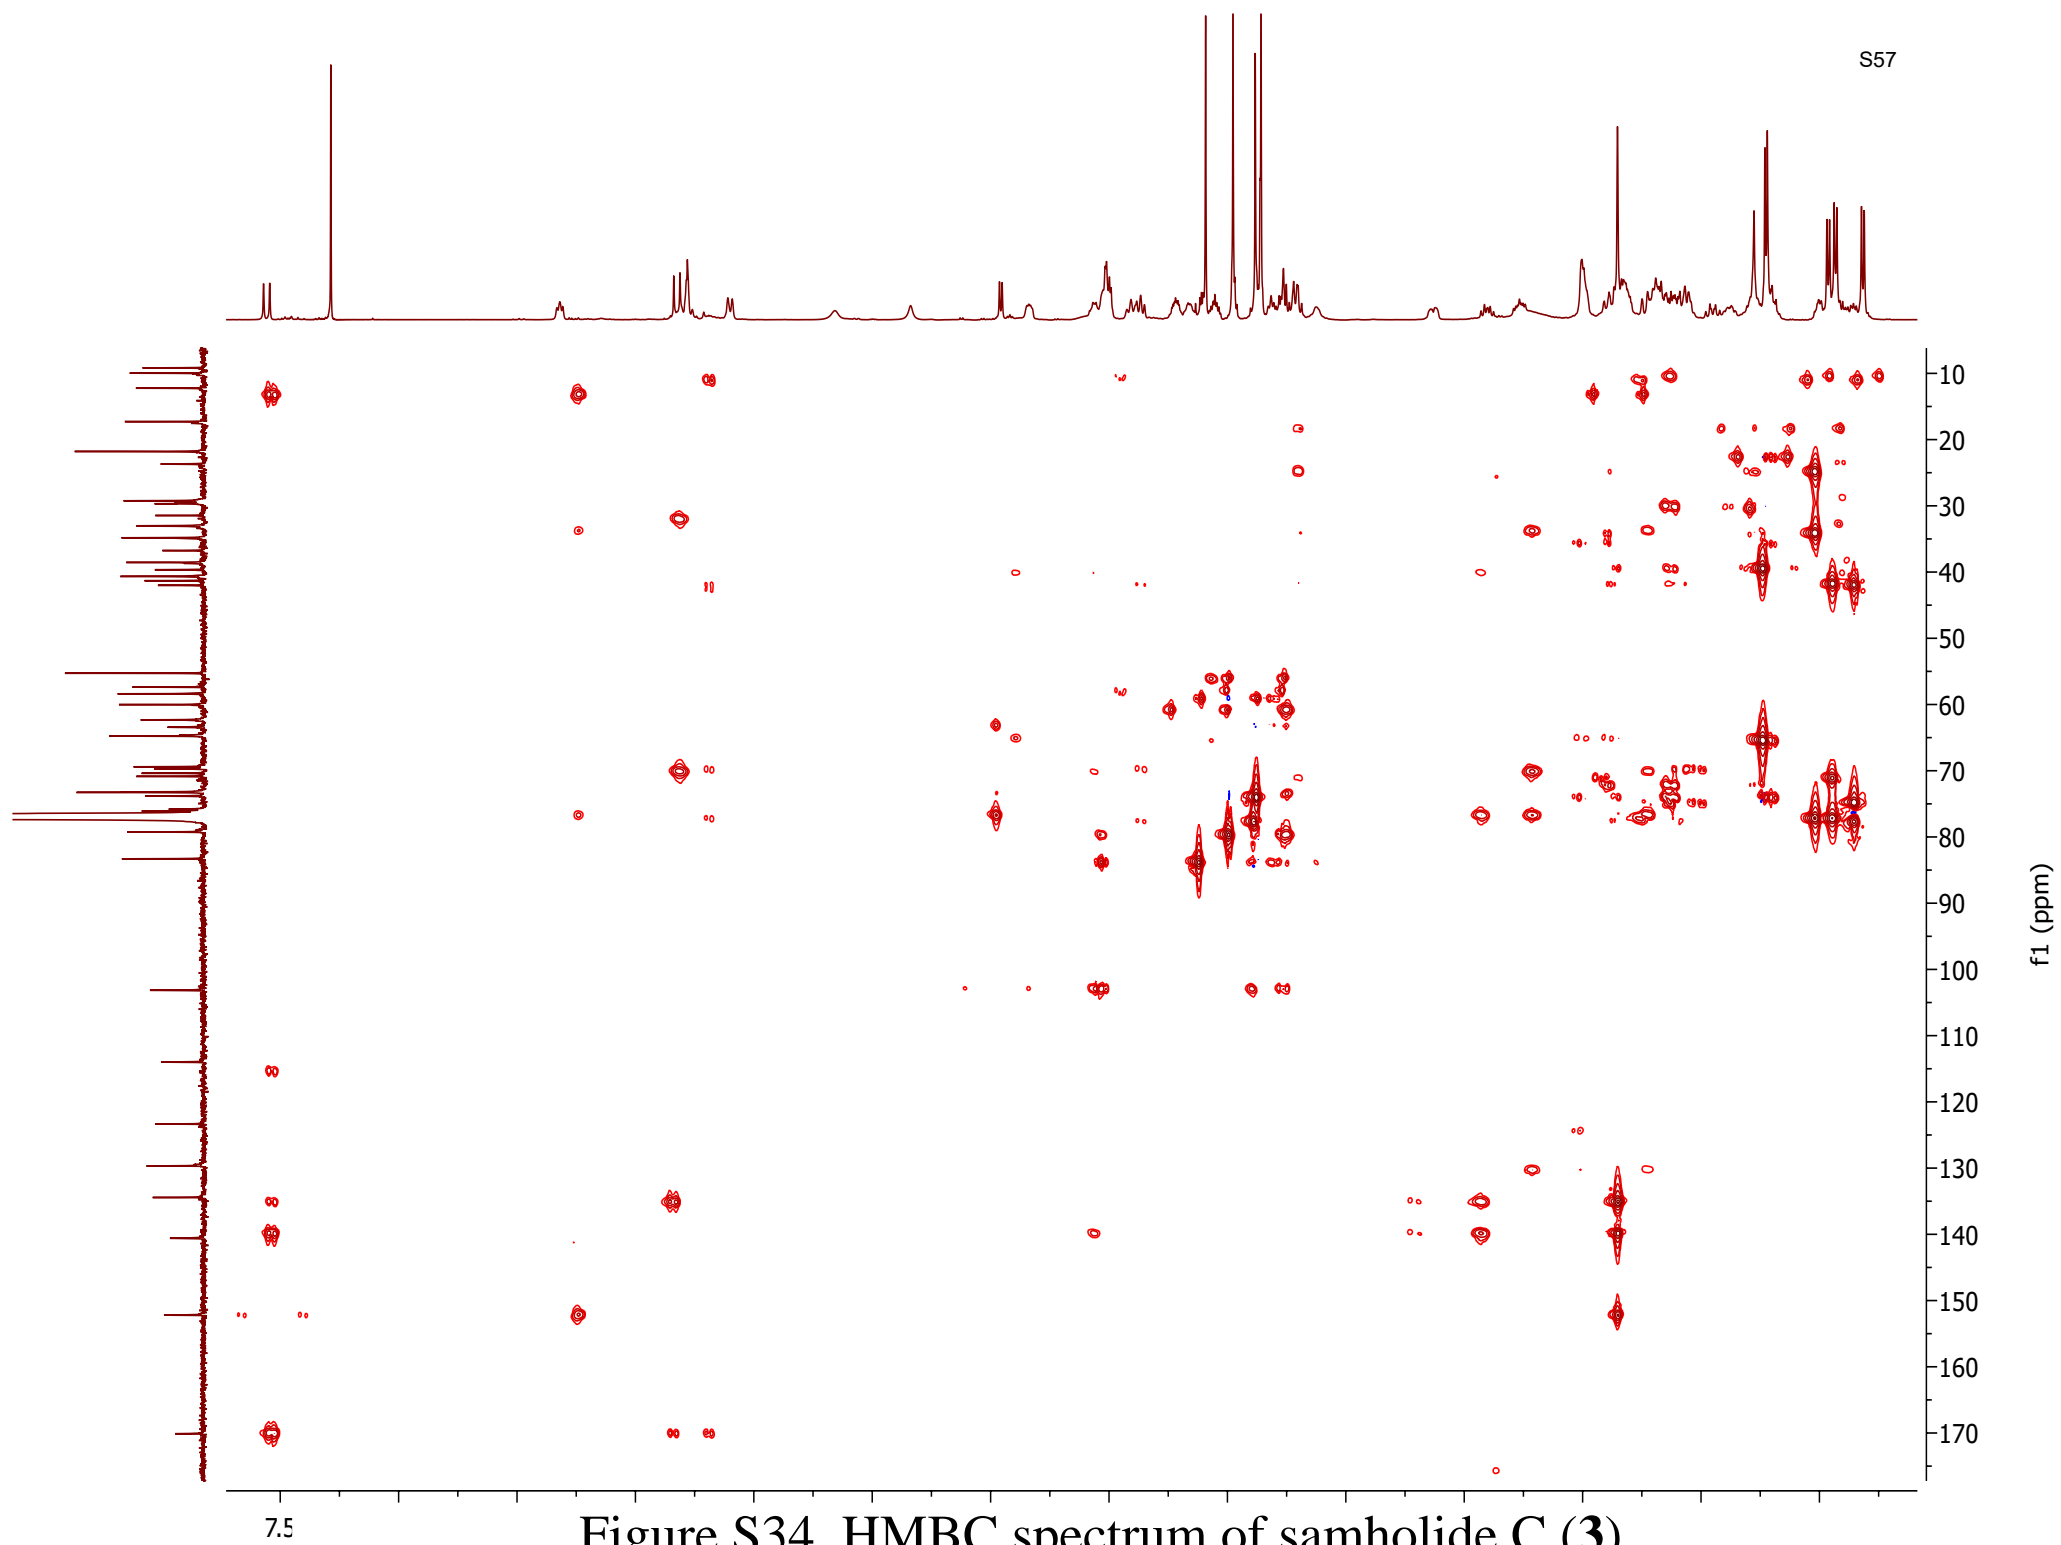

Figure S34 HMBC spectrum of samholide C (3)

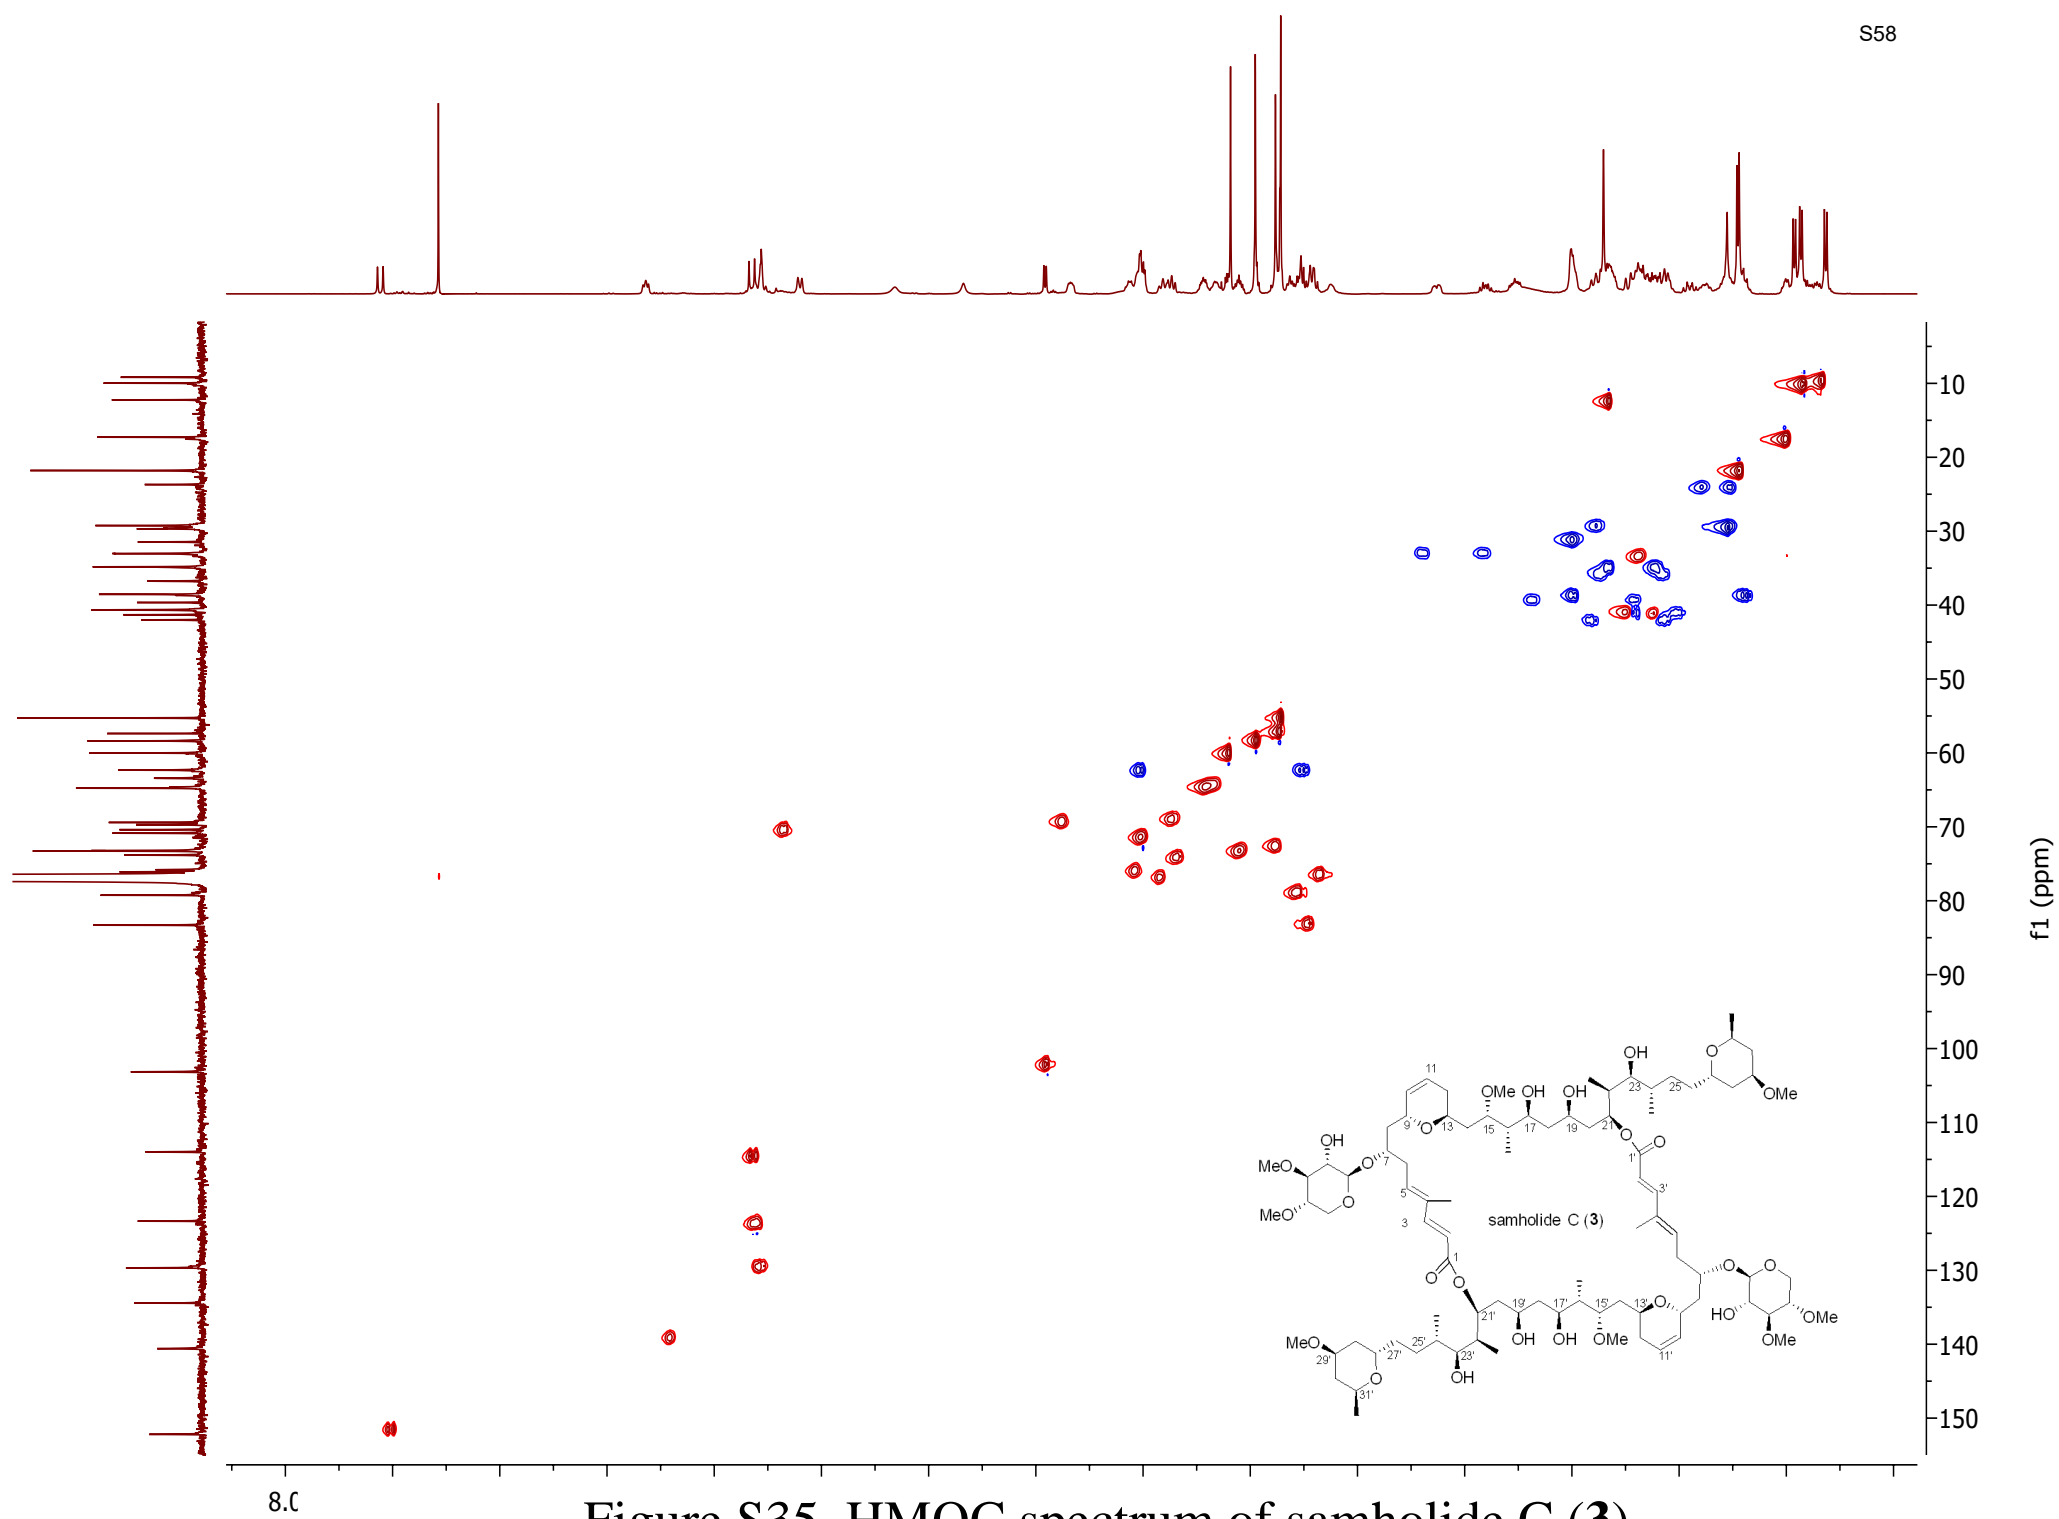

8.0

Figure S35 HMBC spectrum of samholide C (3)

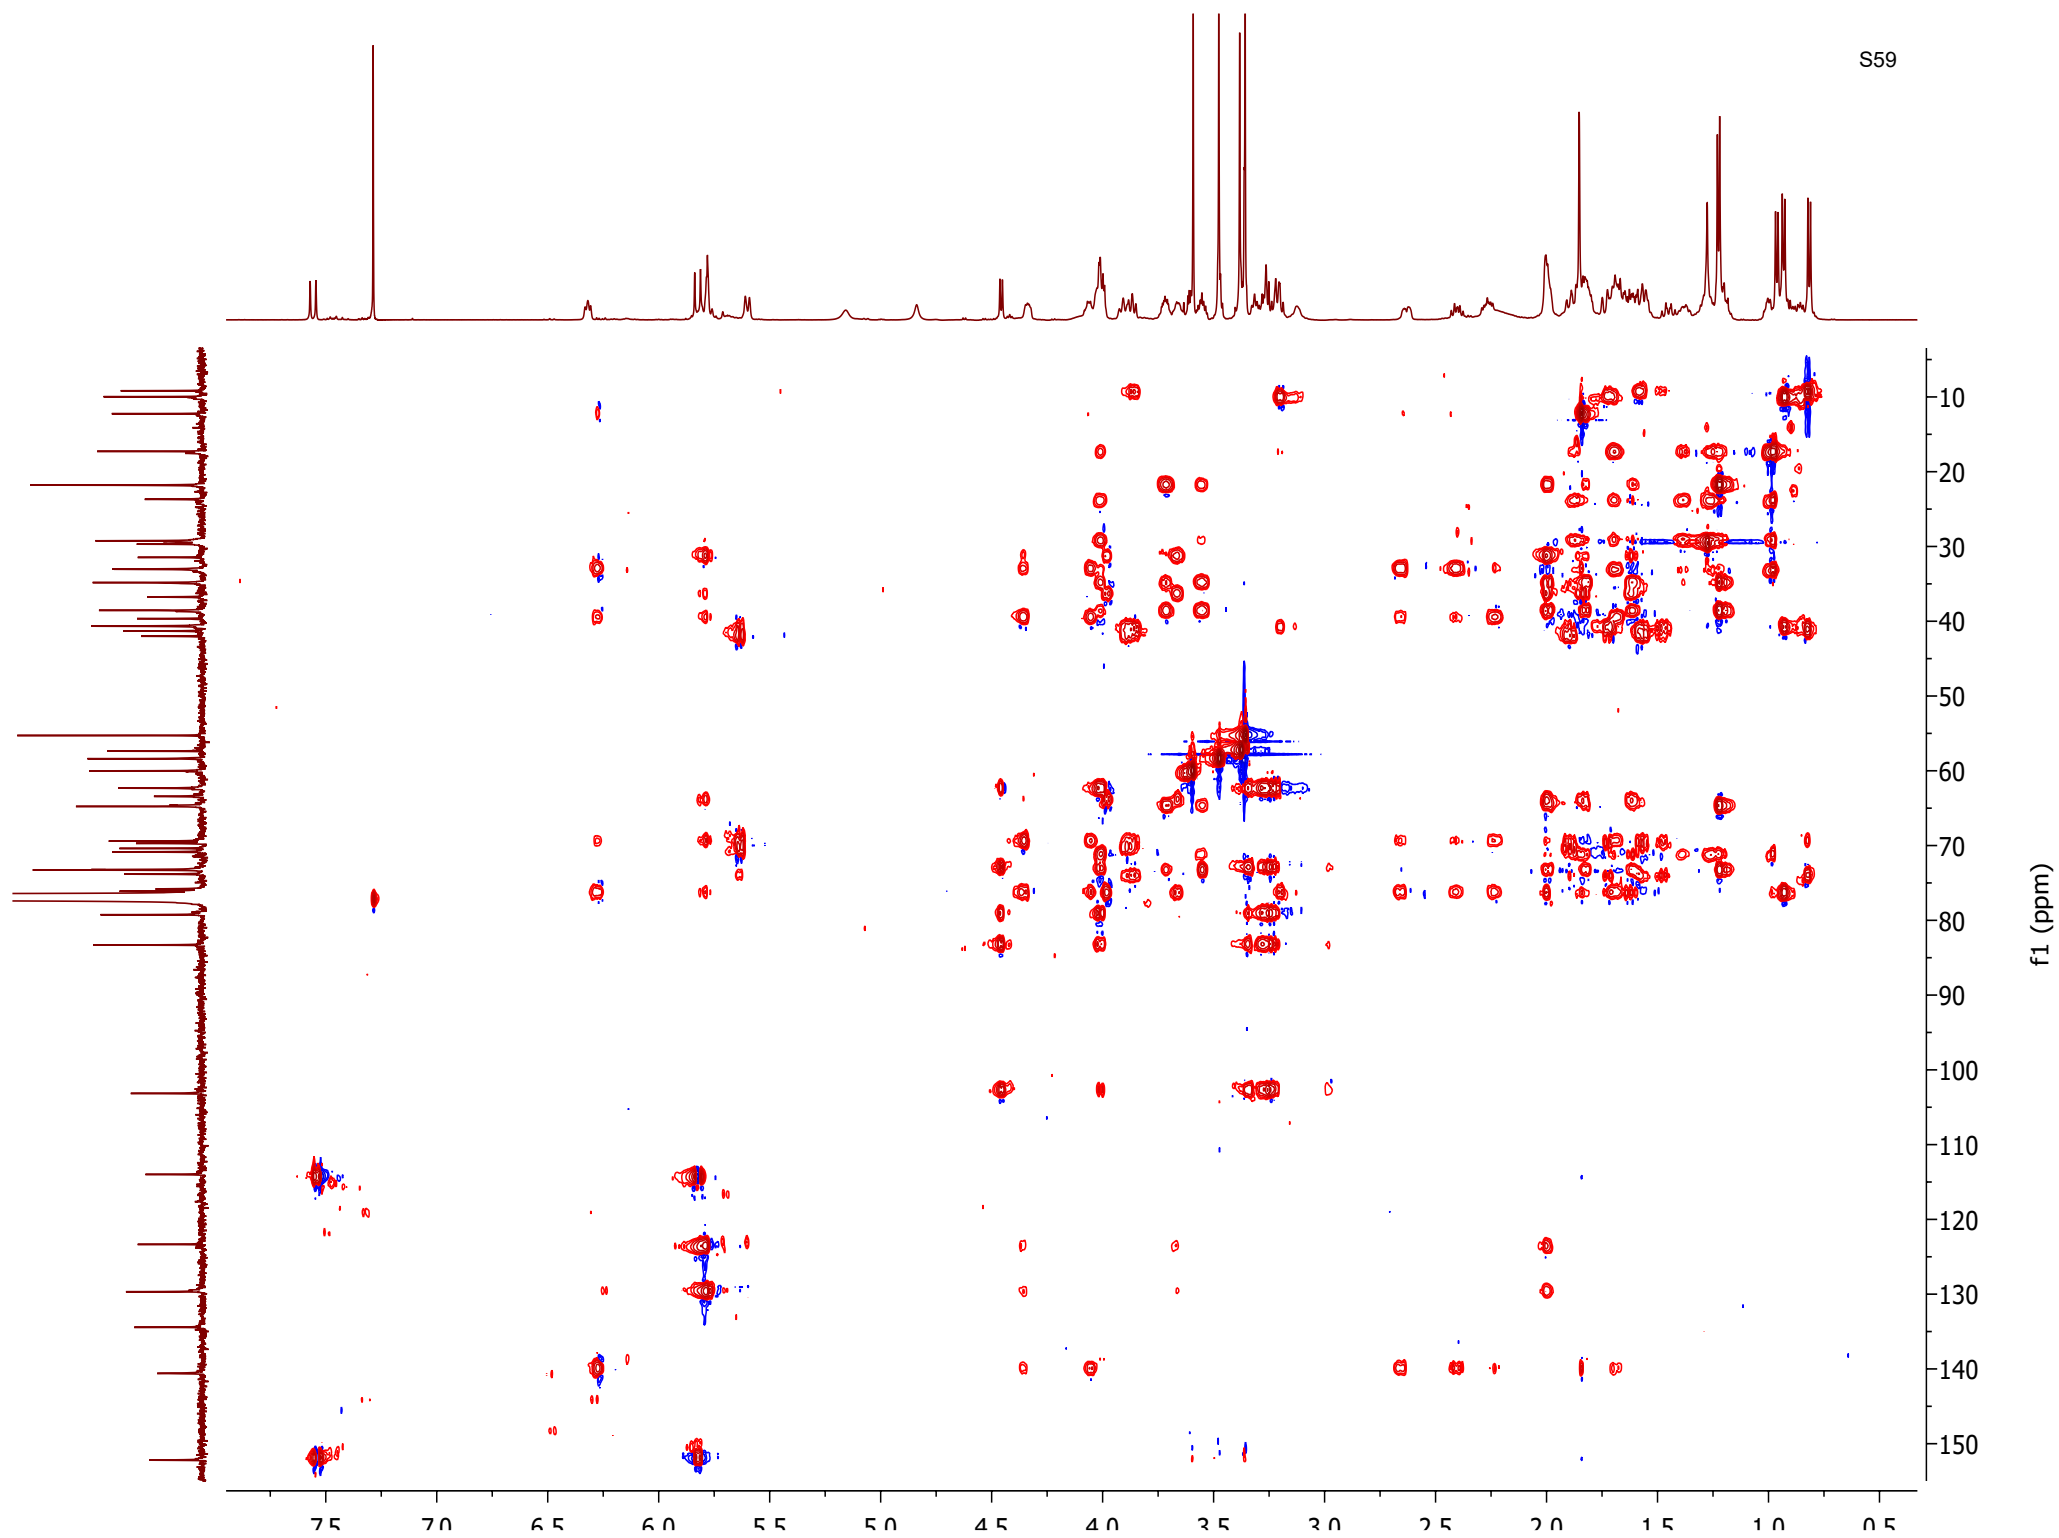

Figure S36 HSQC-TOCSY spectrum of samholide C (3)

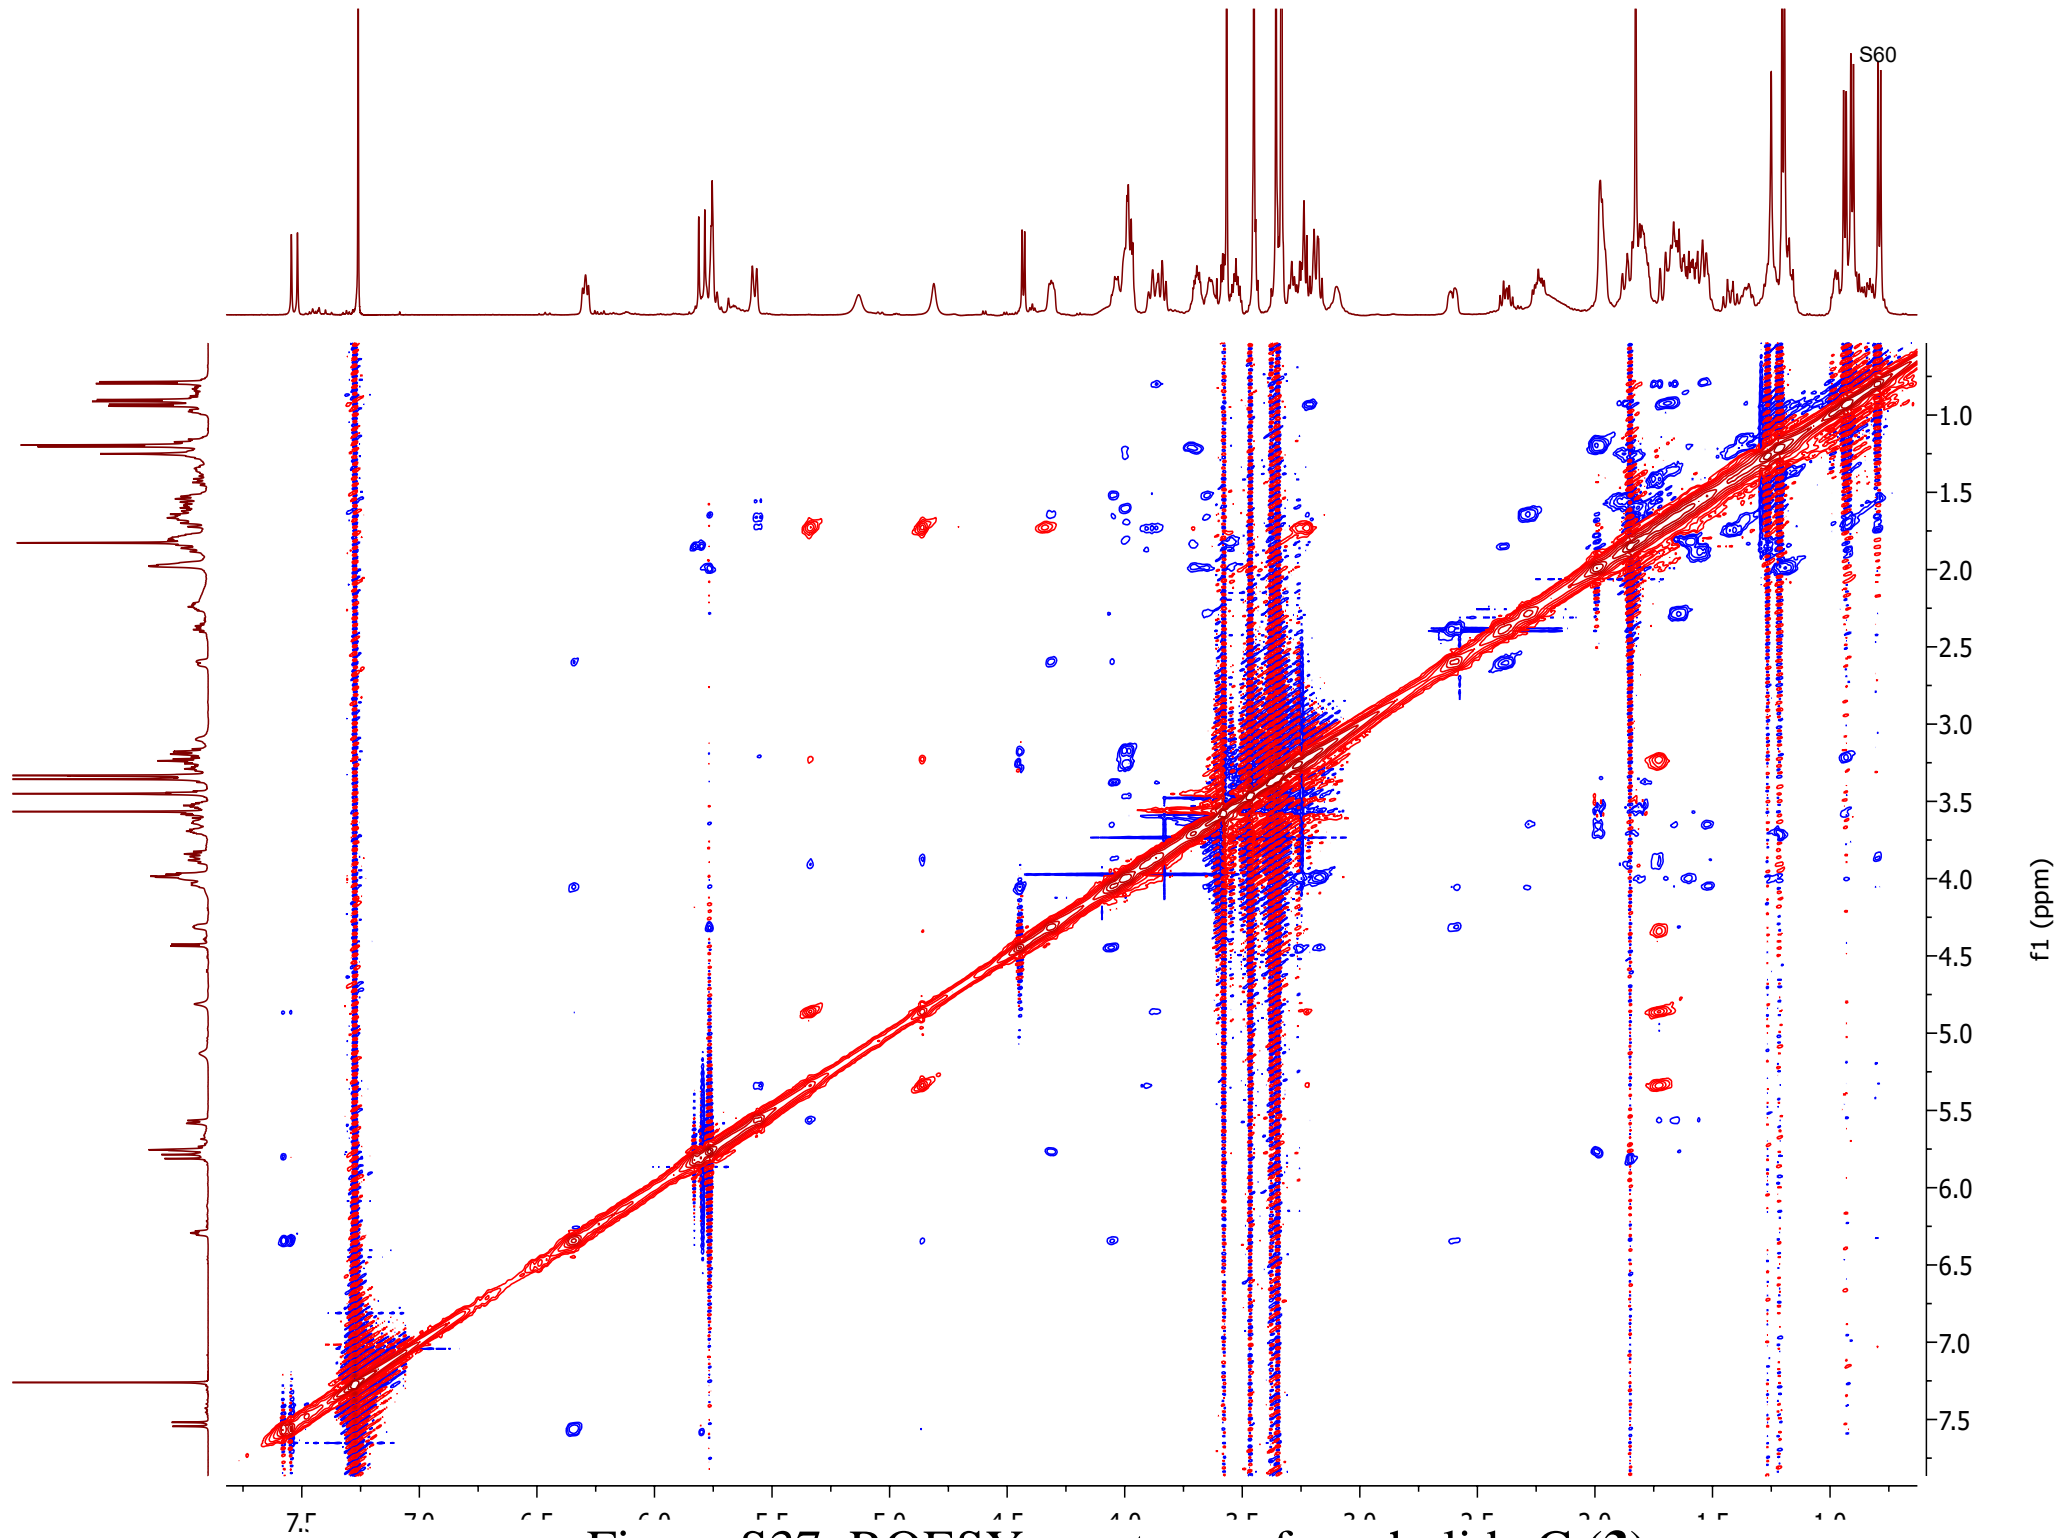

Figure S37 ROESY spectrum of samholide C (3)

2226H3D2B-a #20-22 RT: 0.48-0.53 AV: 3 SB: 6 0.07-0.19 NL: 2.71E8  
T: + c Full ms [ 200.00-2000.00]

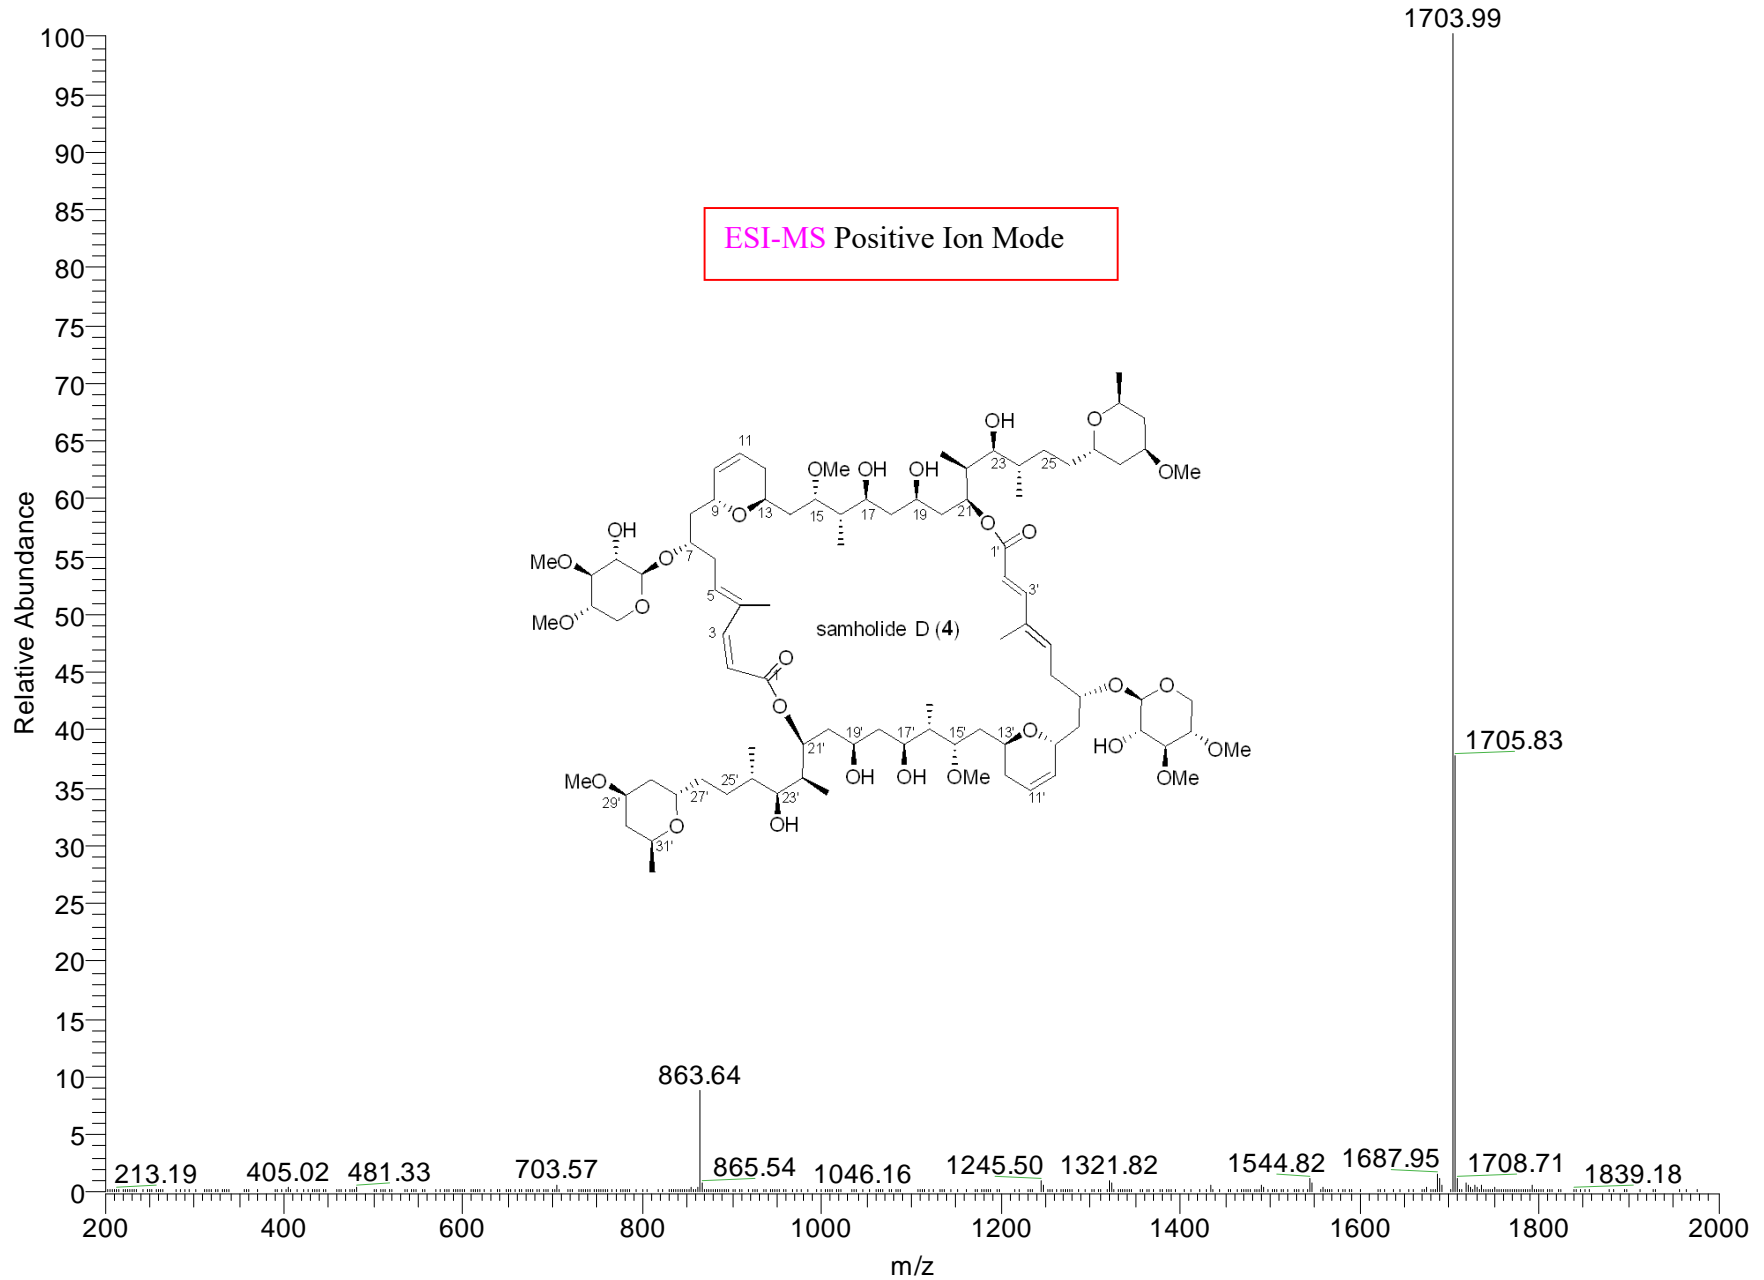

Figure S38 The ESI MS spectrum of samholide D (4)

2226H3D2B-a #24-33 RT: 0.58-0.72 AV: 10 NL: 3.76E7  
F: + c Full ms2 1704.00@35.00 [490.00-2000.00]

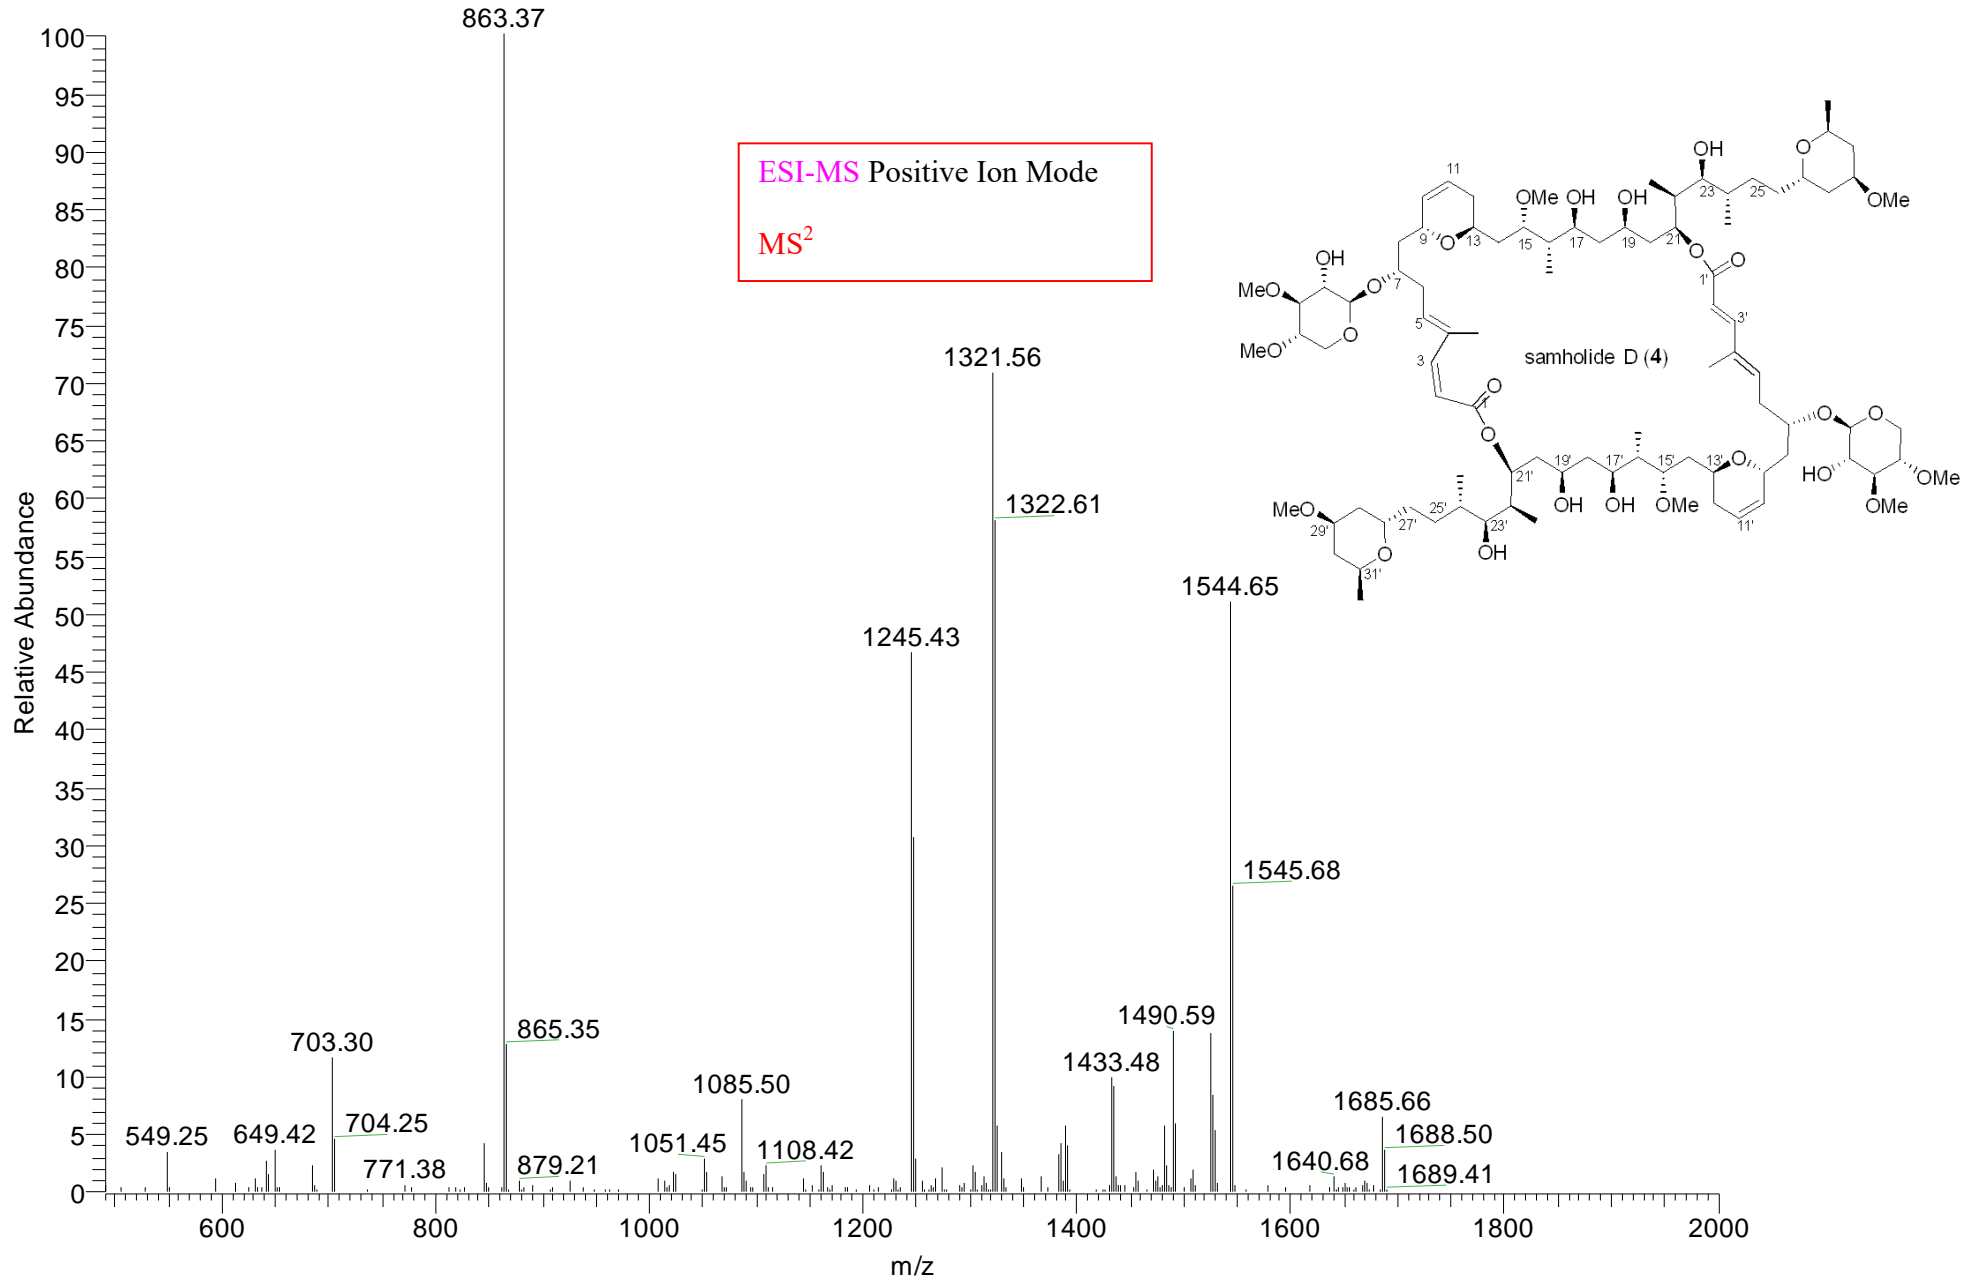

Figure S39 The ESI MS<sup>2</sup> spectrum of samholide D (4)

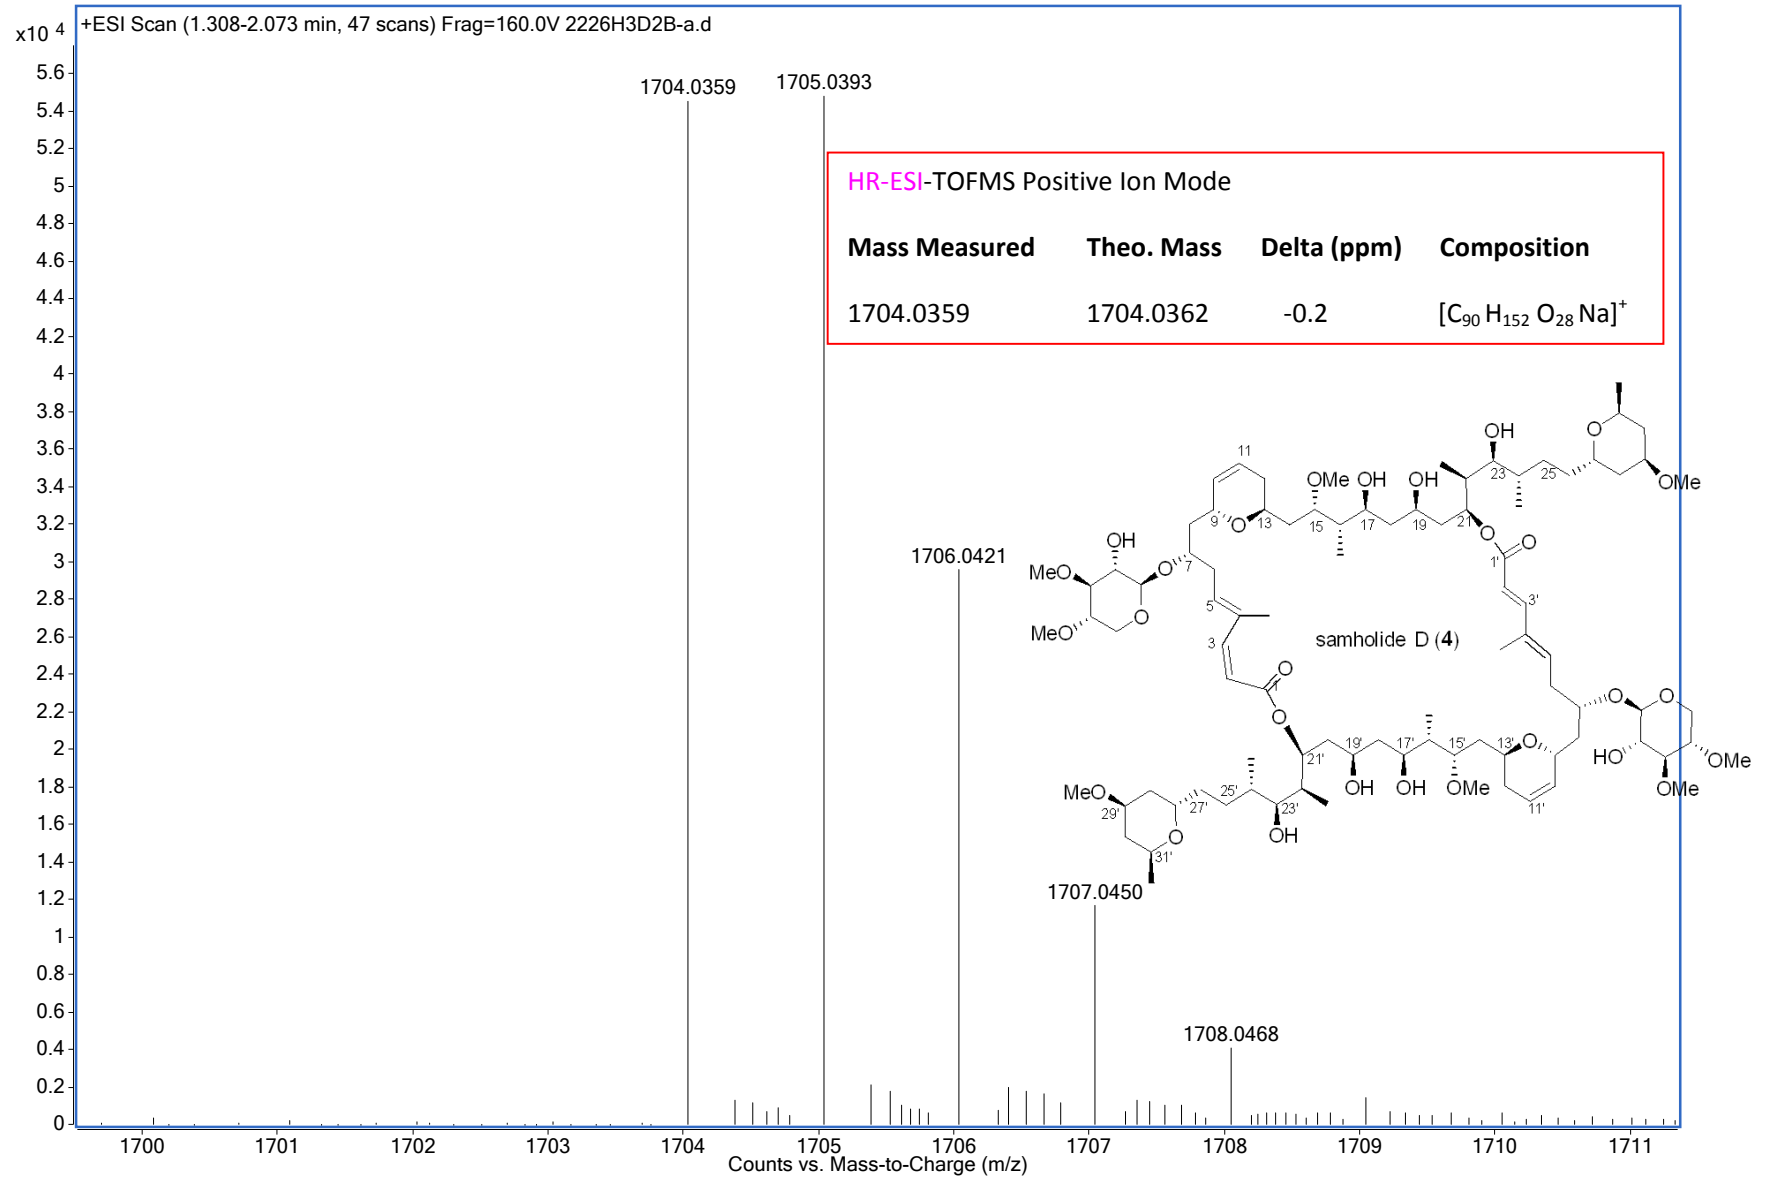

Figure S40 The positive HRESIMS spectrum of samholide D (4)

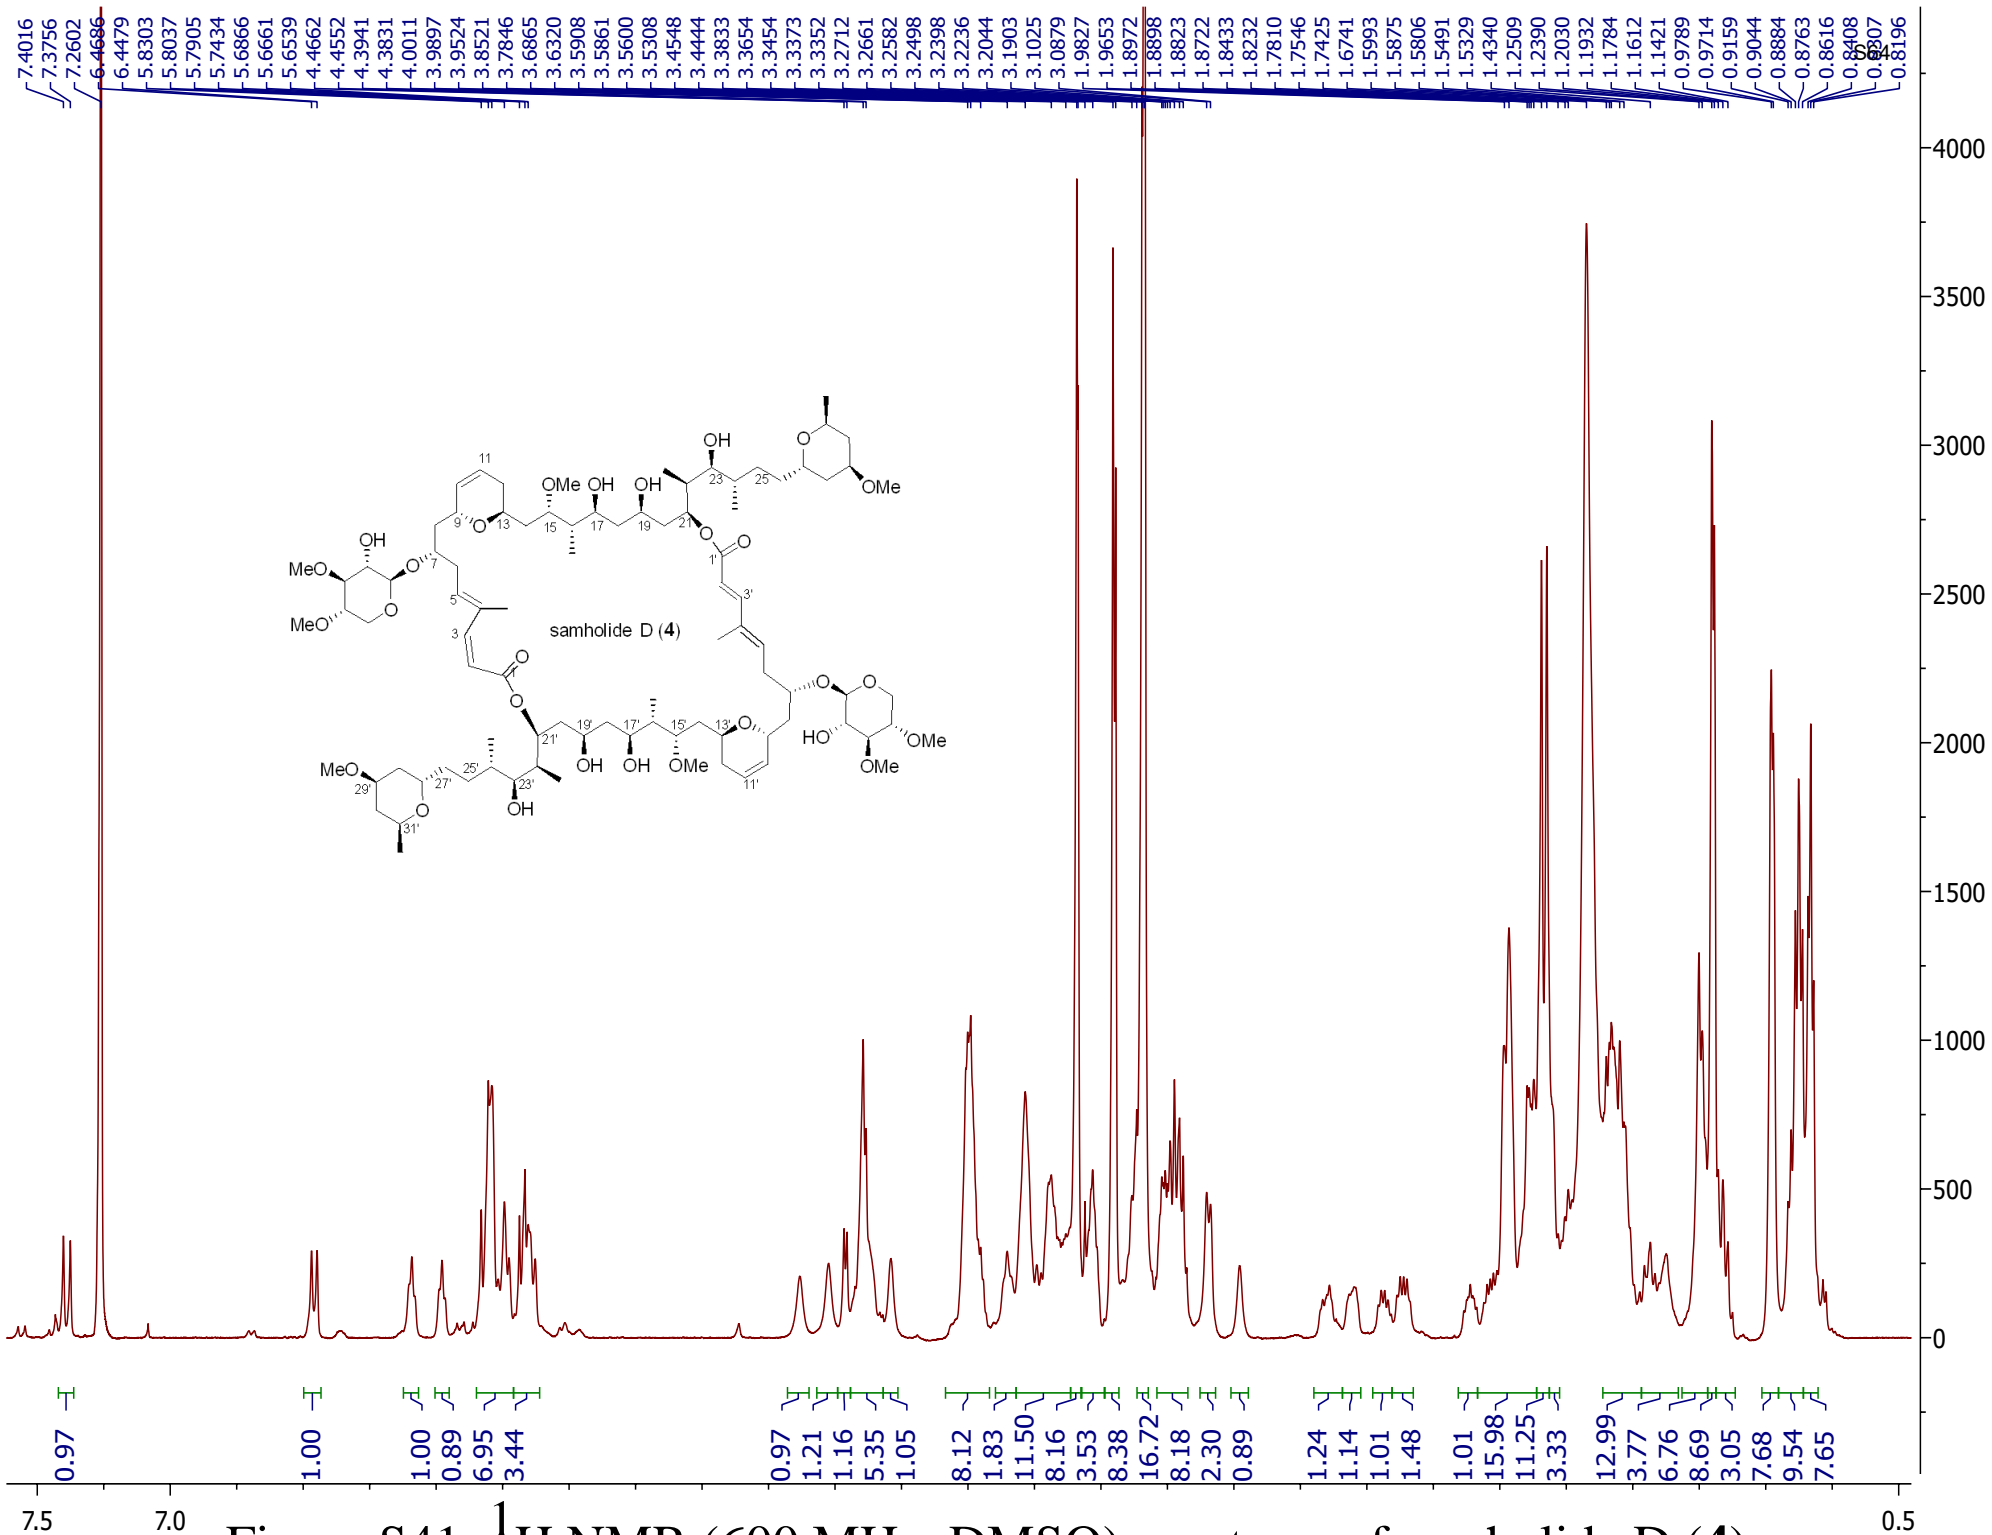



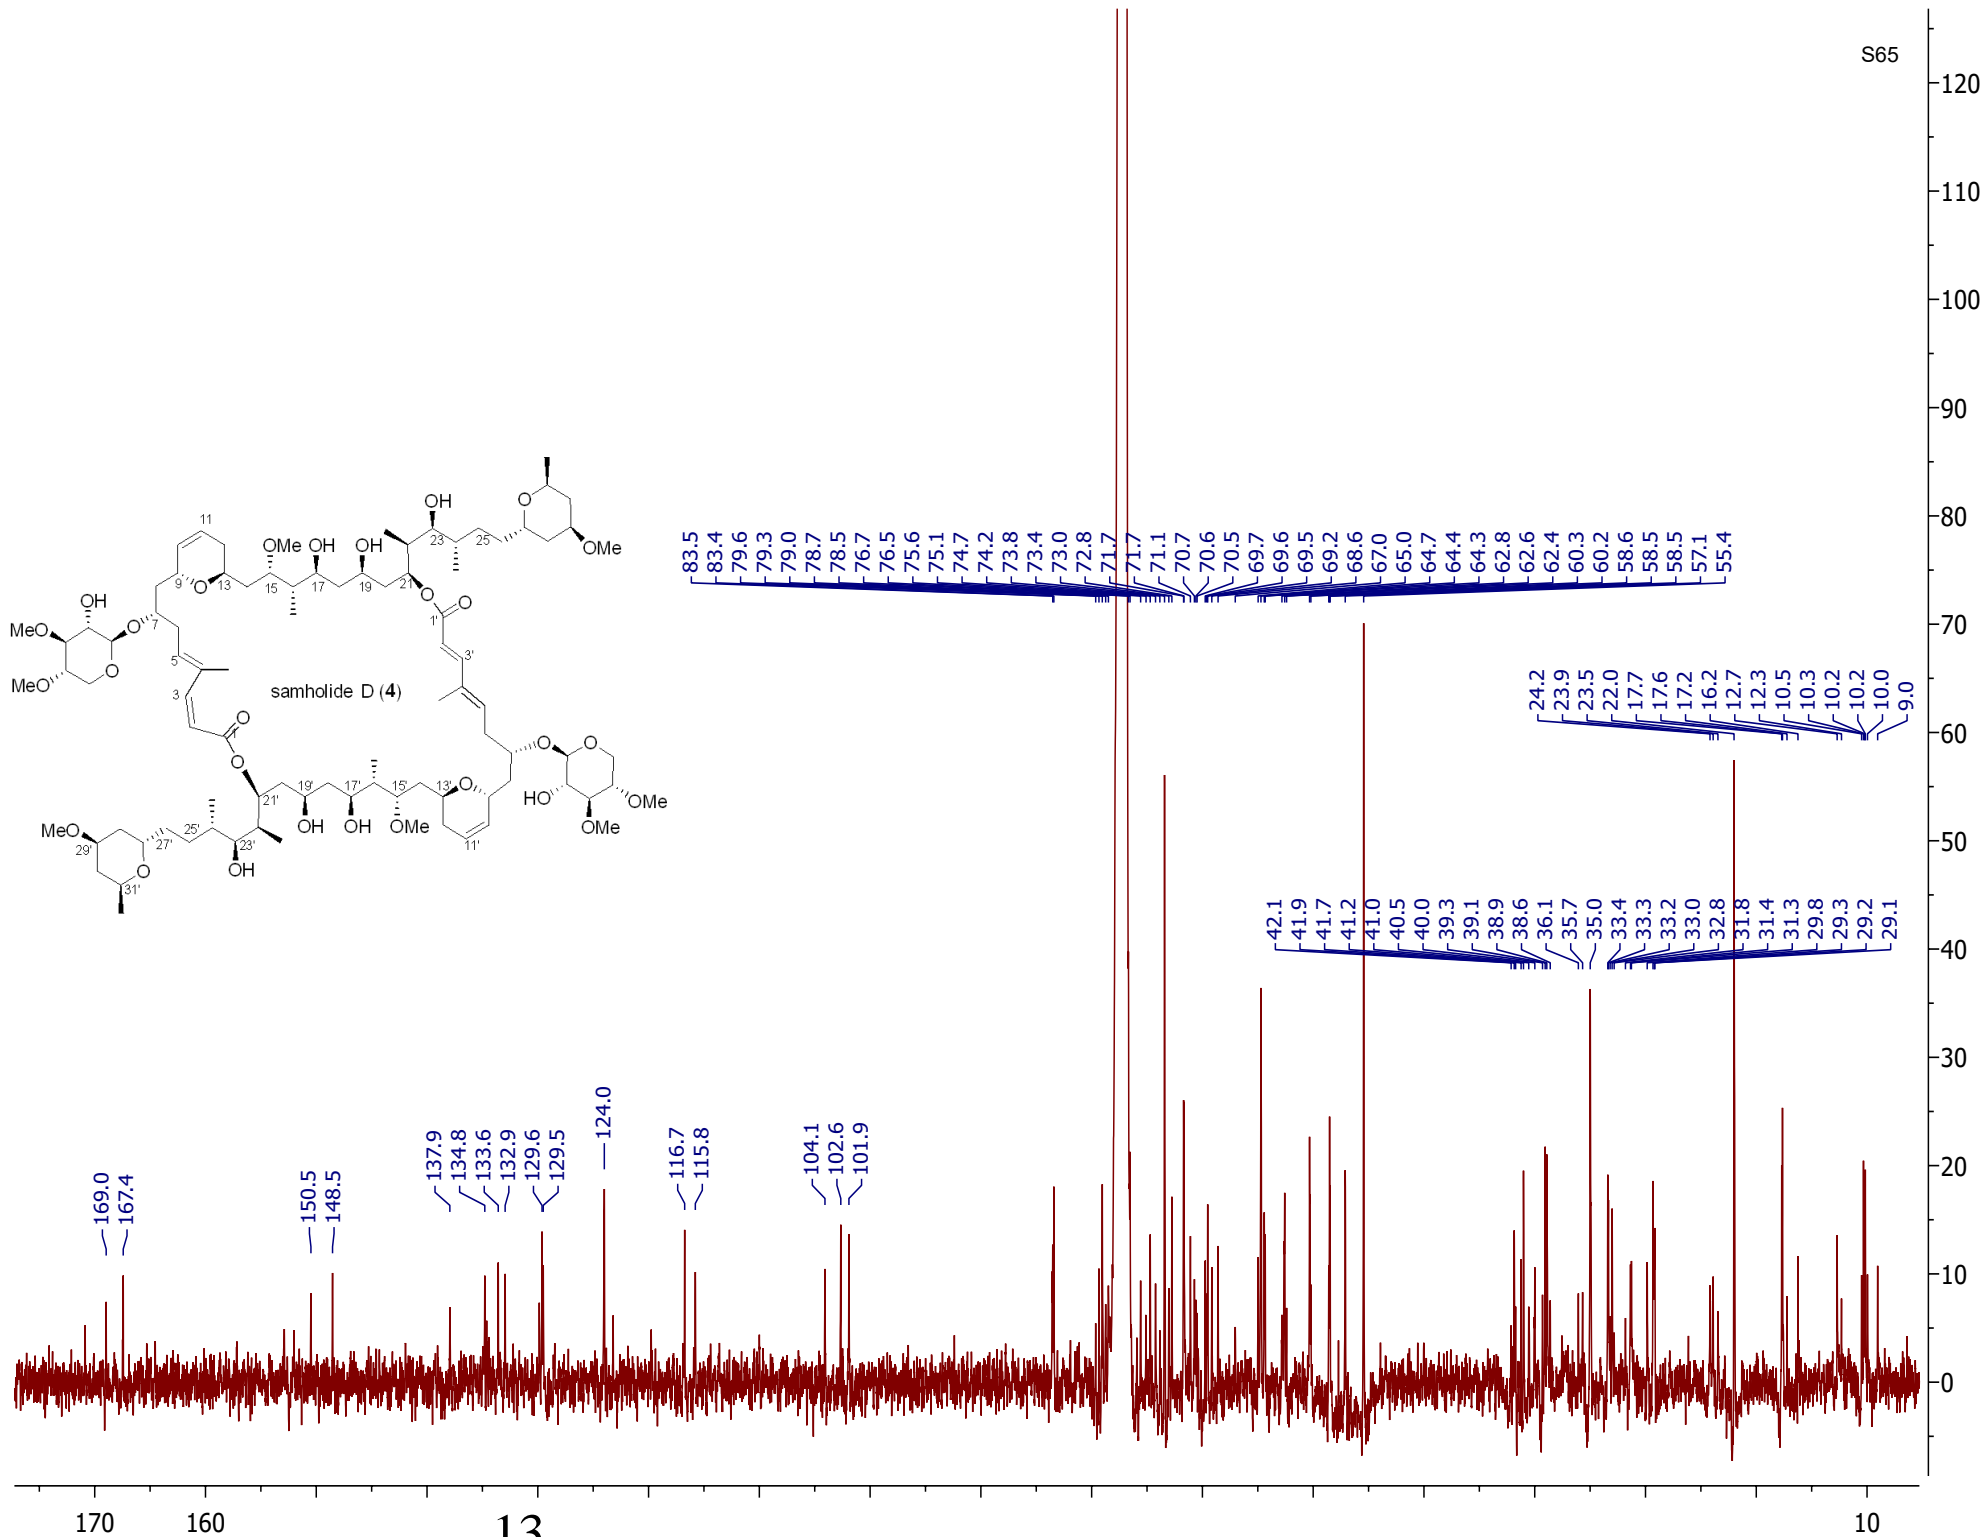

Figure S42  $^{13}\text{C}$  NMR (150 MHz, DMSO) spectrum of samholide D (4)

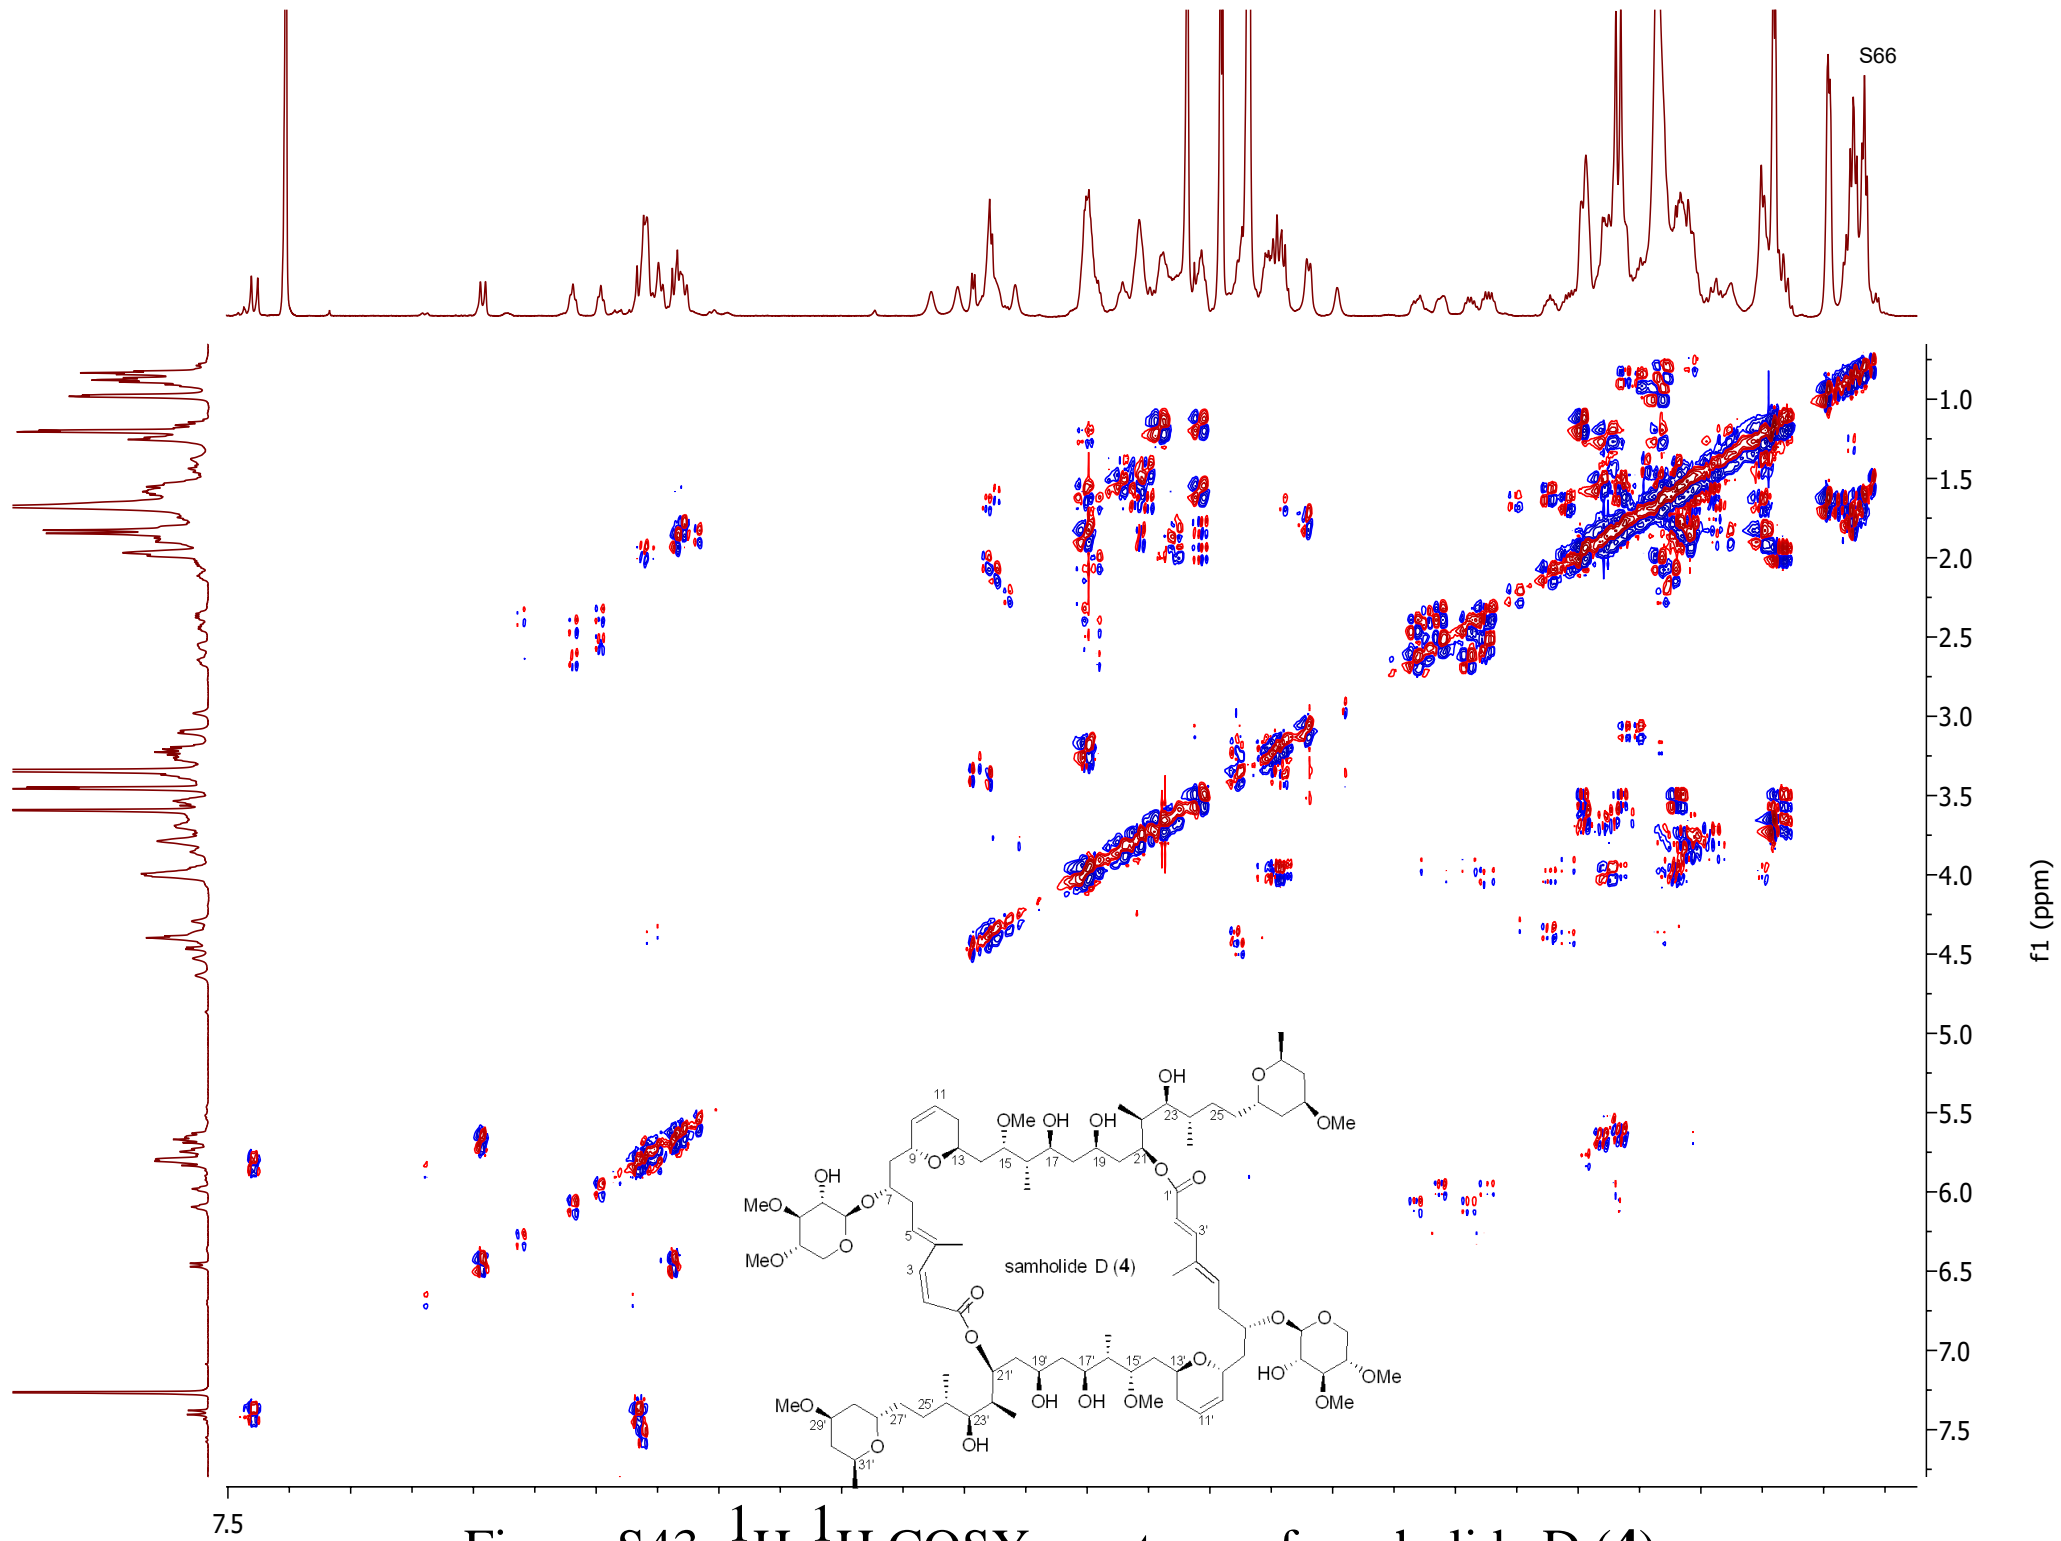

Figure S43  $^1\text{H}$ - $^1\text{H}$  COSY spectrum of samholide D (**4**)

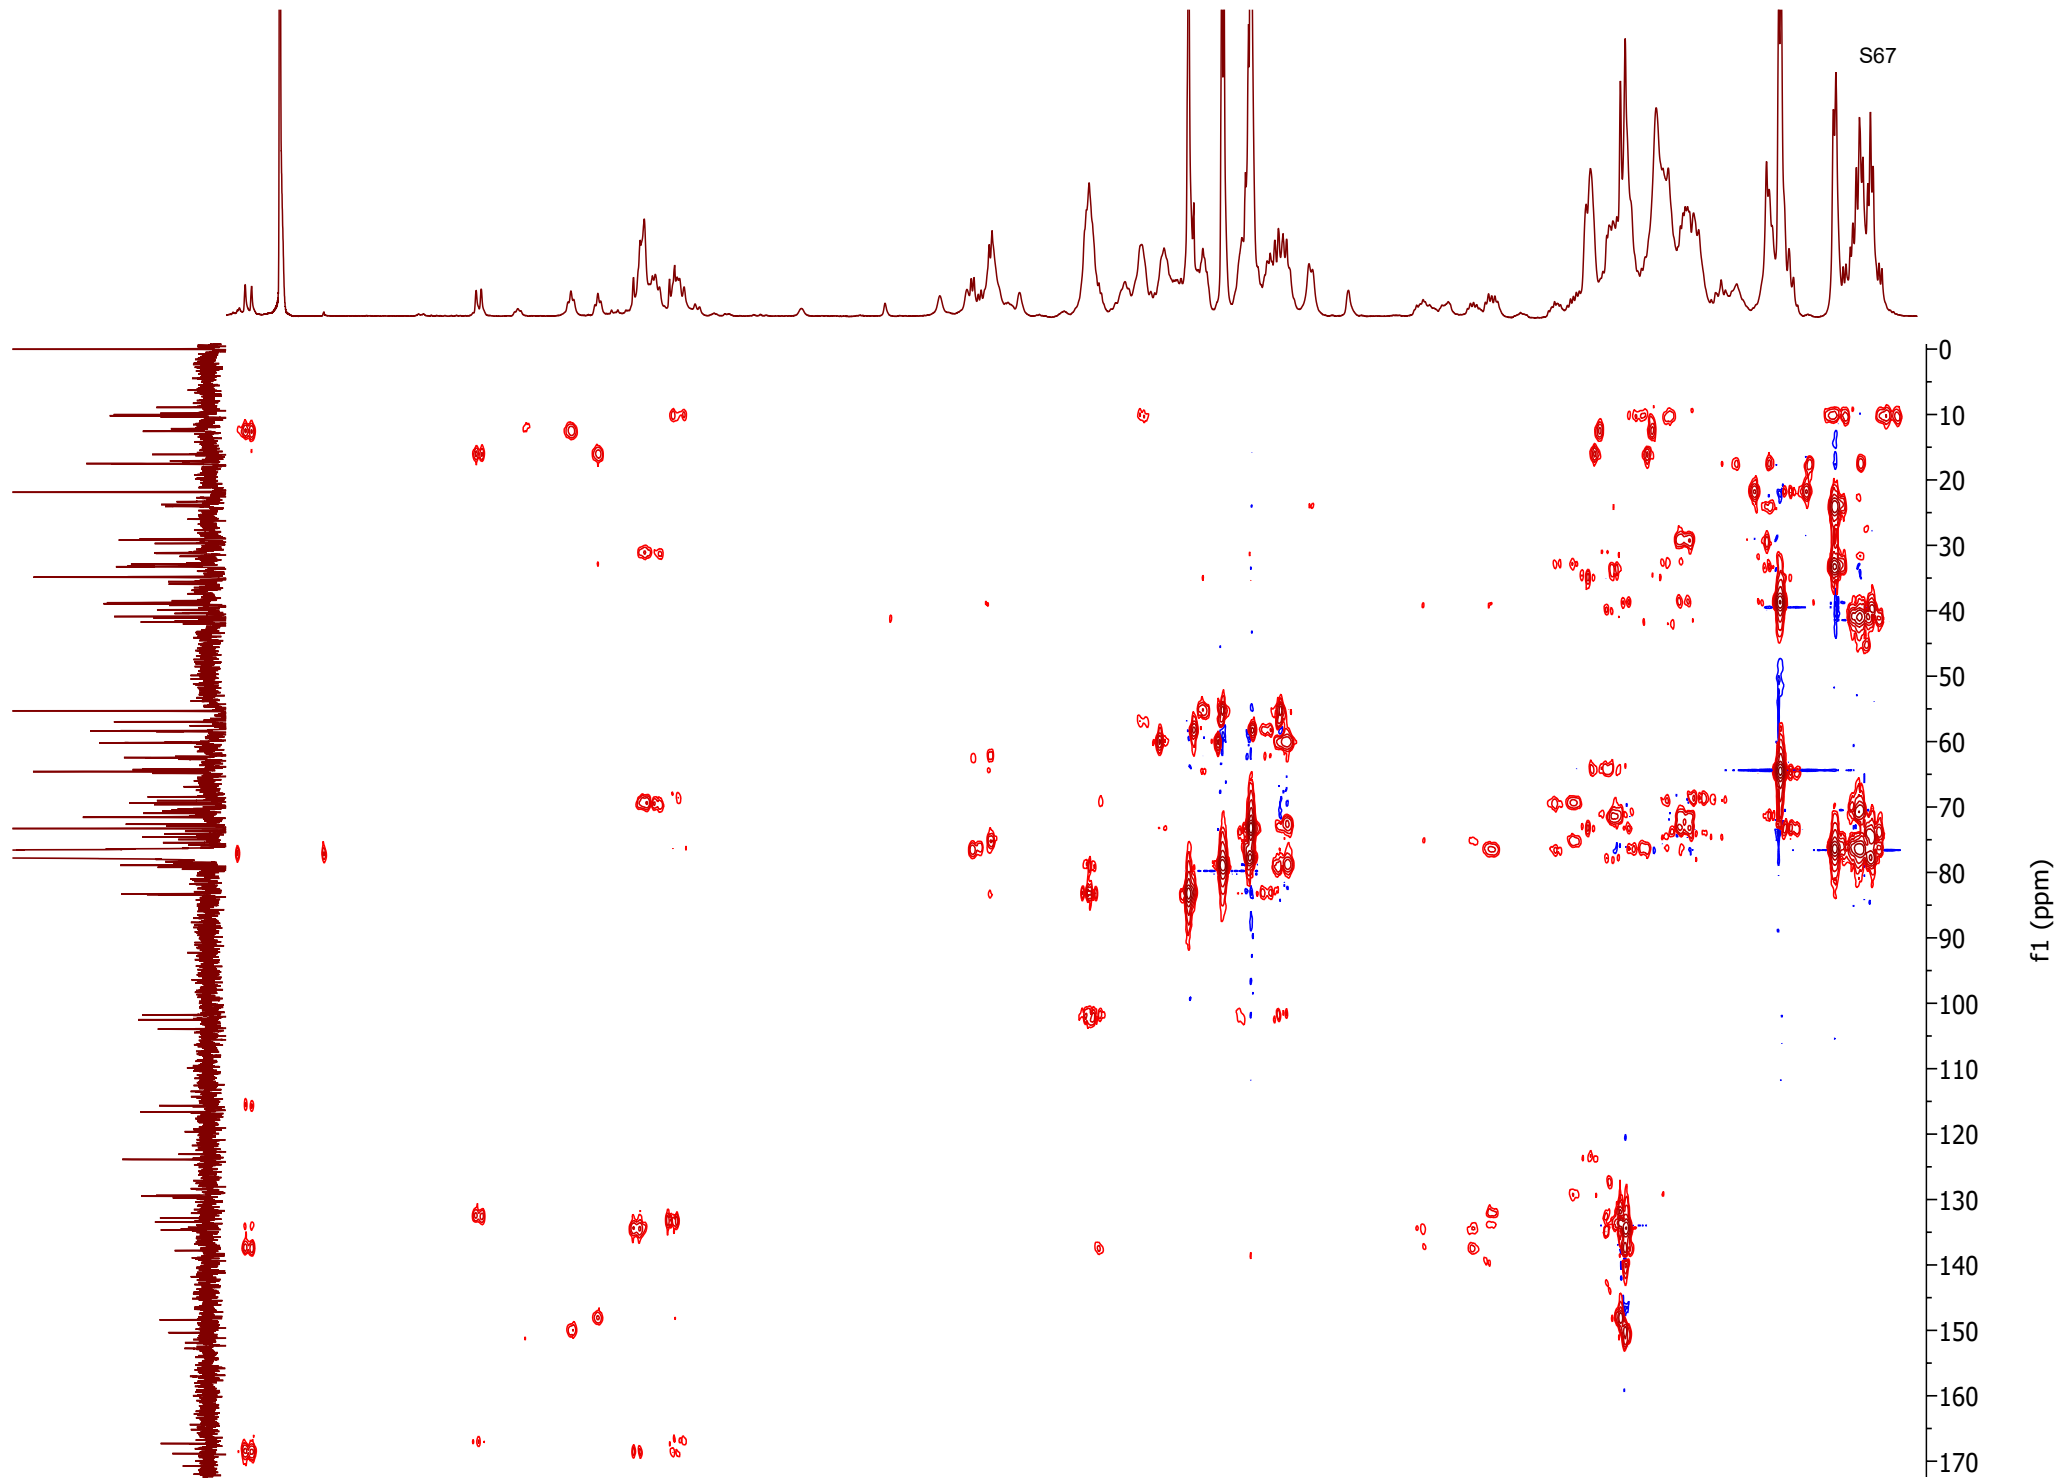

Figure S44 HMBC spectrum of samholide D (4)

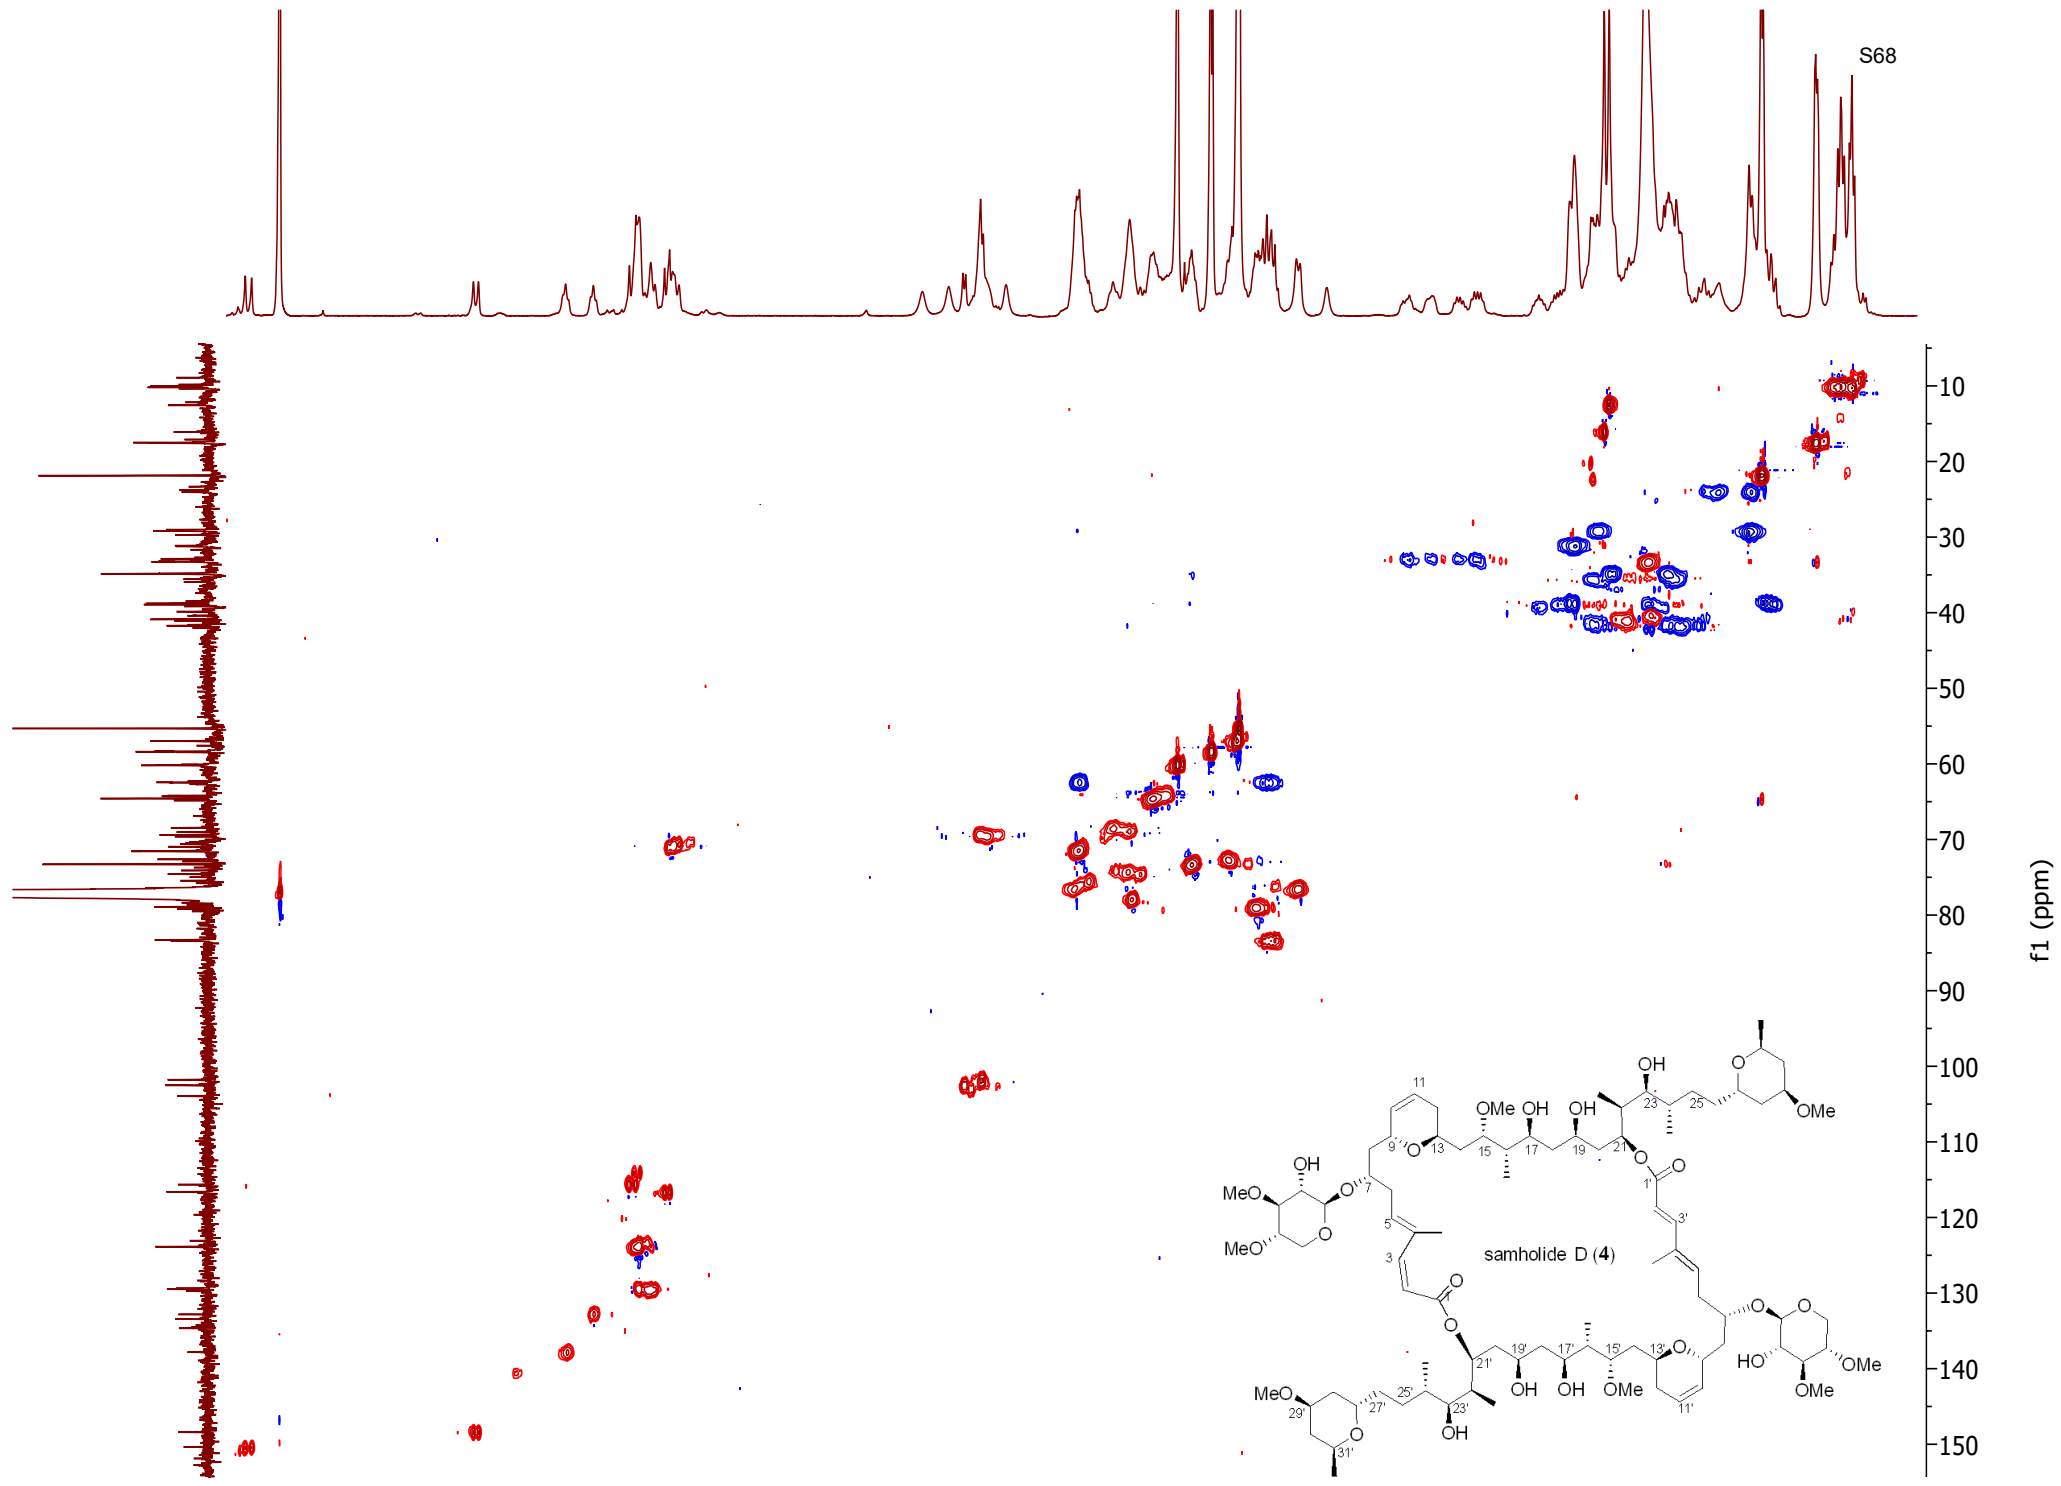

Figure S45 HMQC spectrum of samholide D (4)

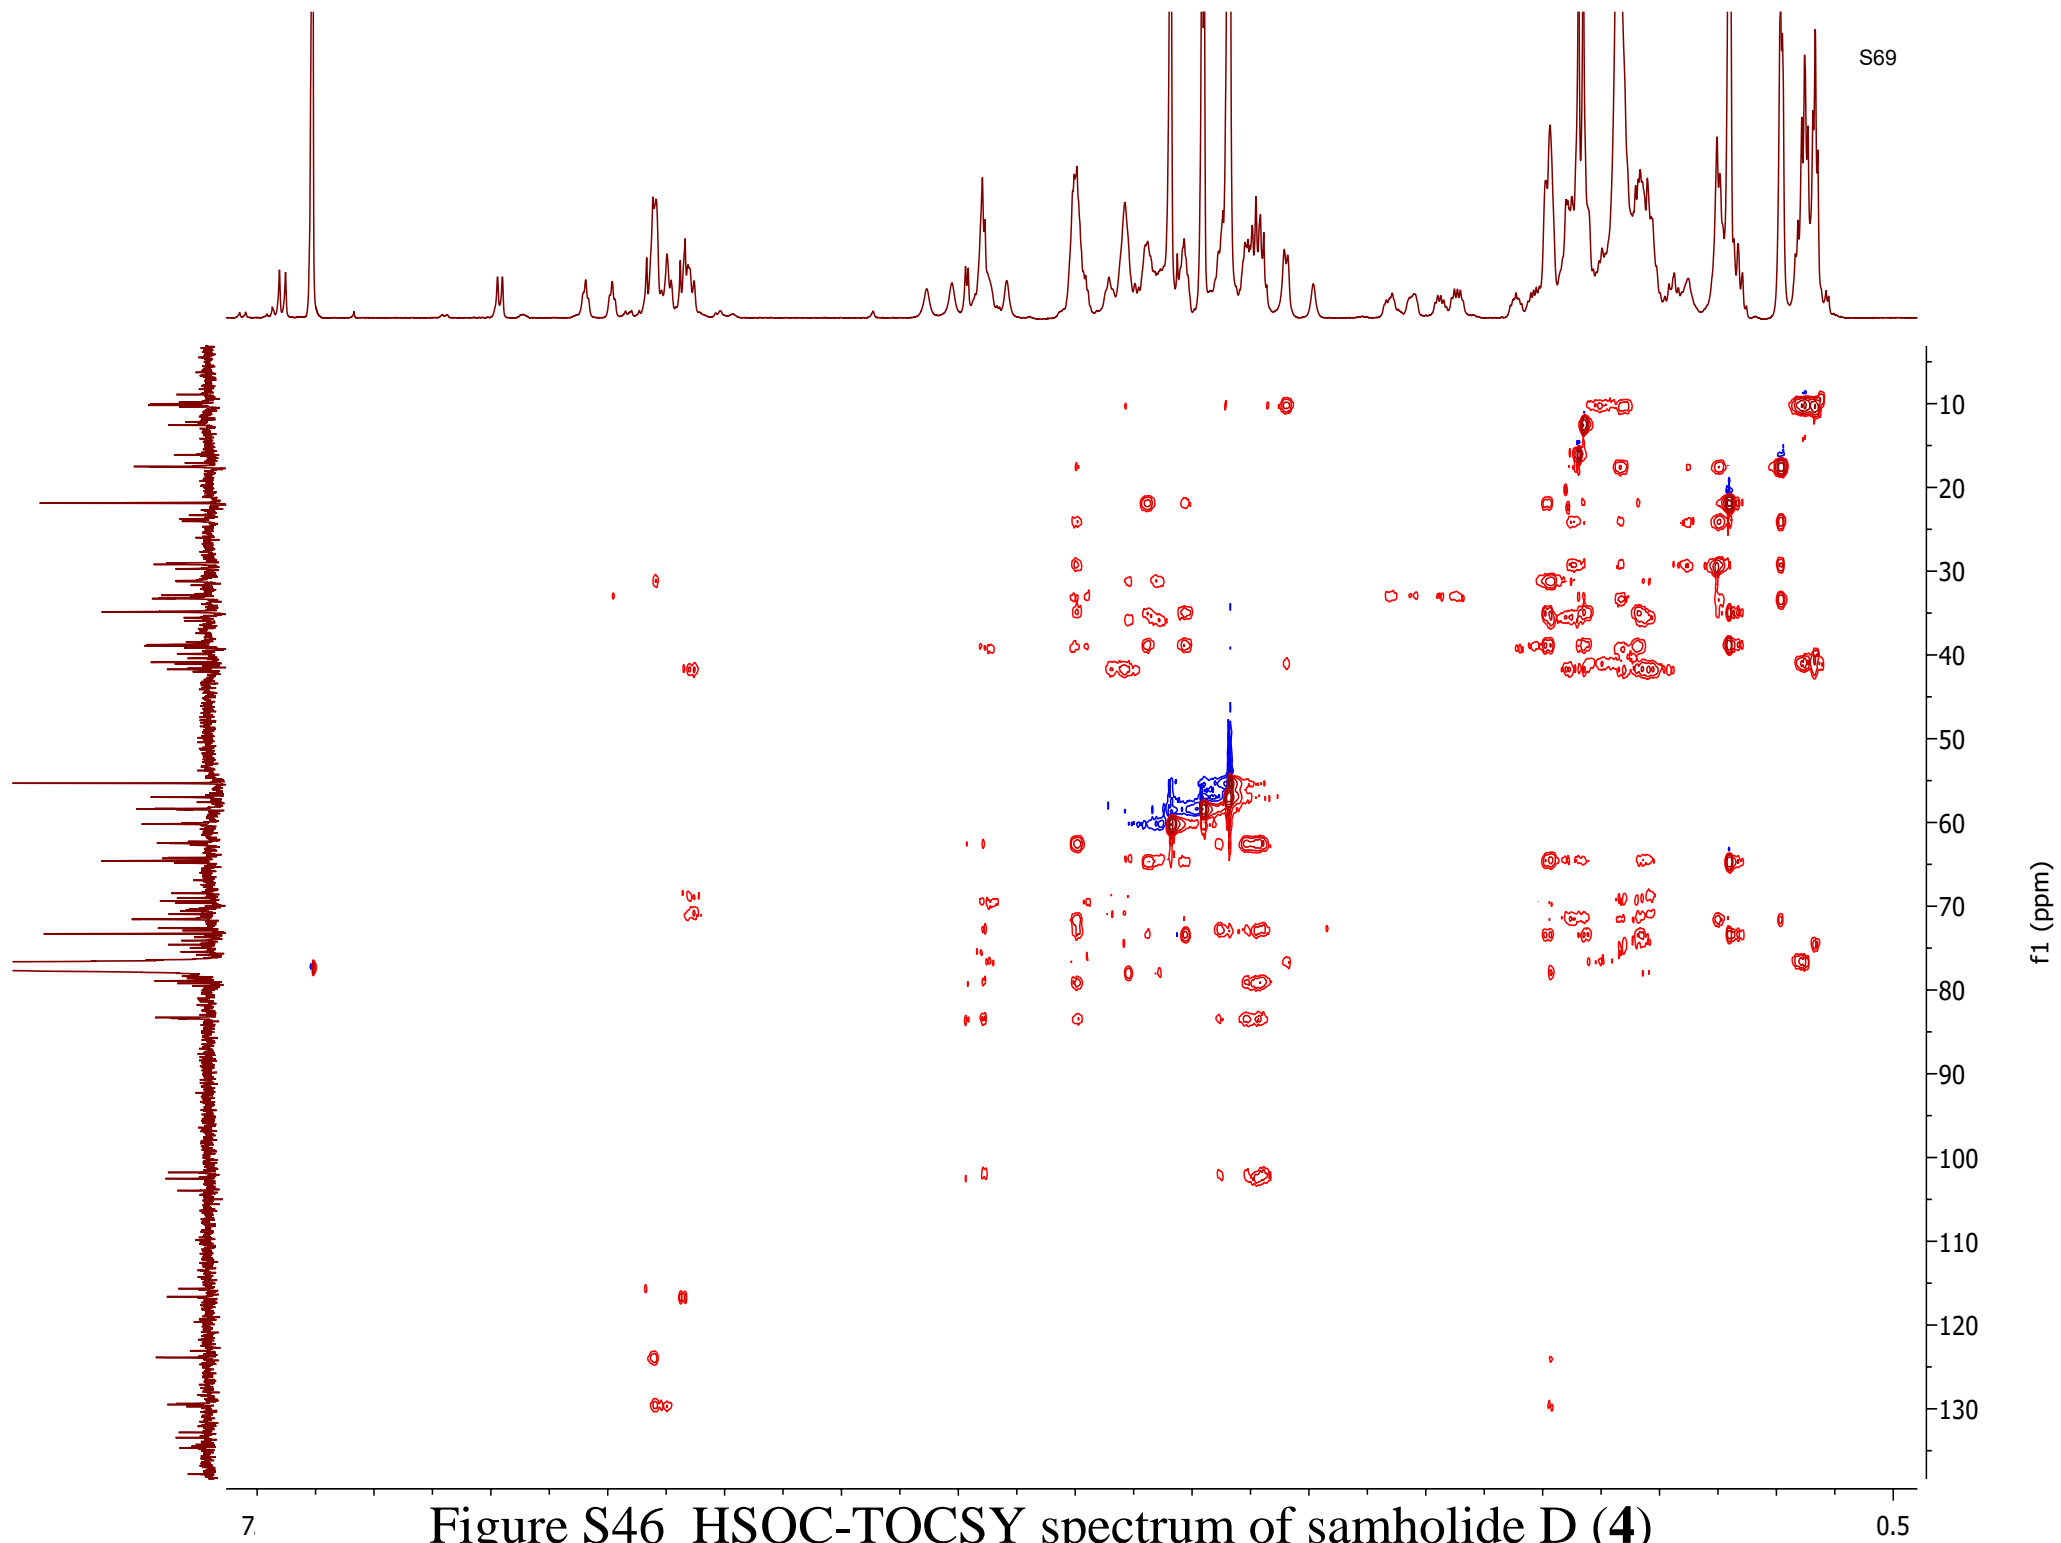

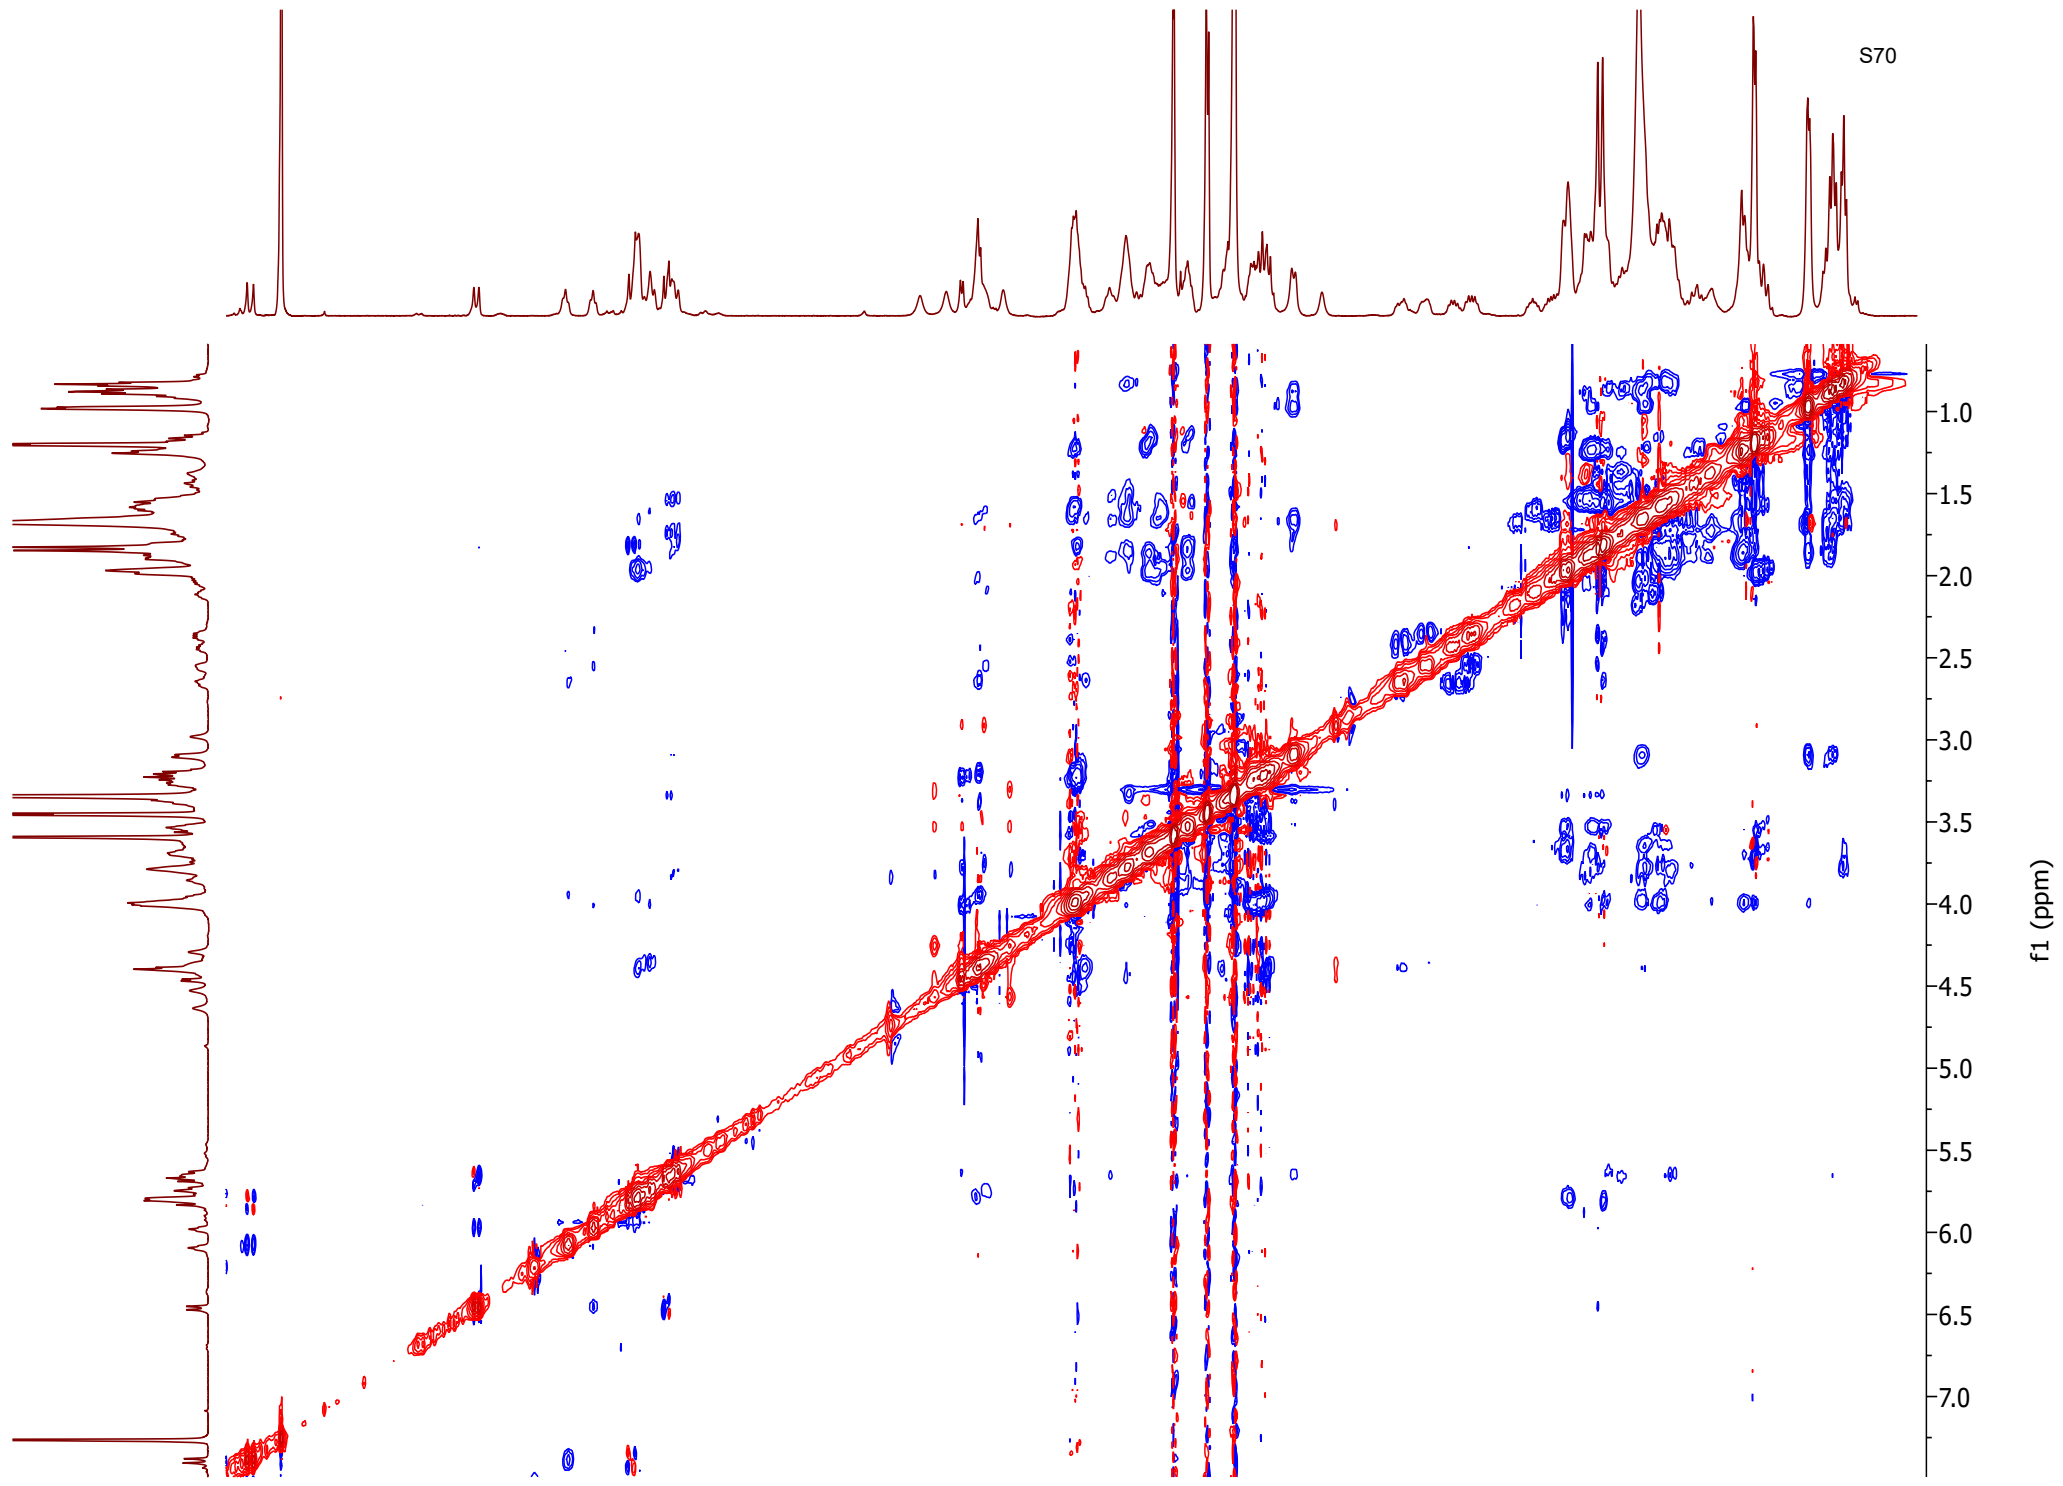

Figure S47 ROESY spectrum of samholide D (4)

E4-a #68-77 RT: 1.79-2.01 AV: 10 SB: 4 1.41-1.49 NL: 7.68E6  
T: + c Full ms [ 300.00-2000.00]

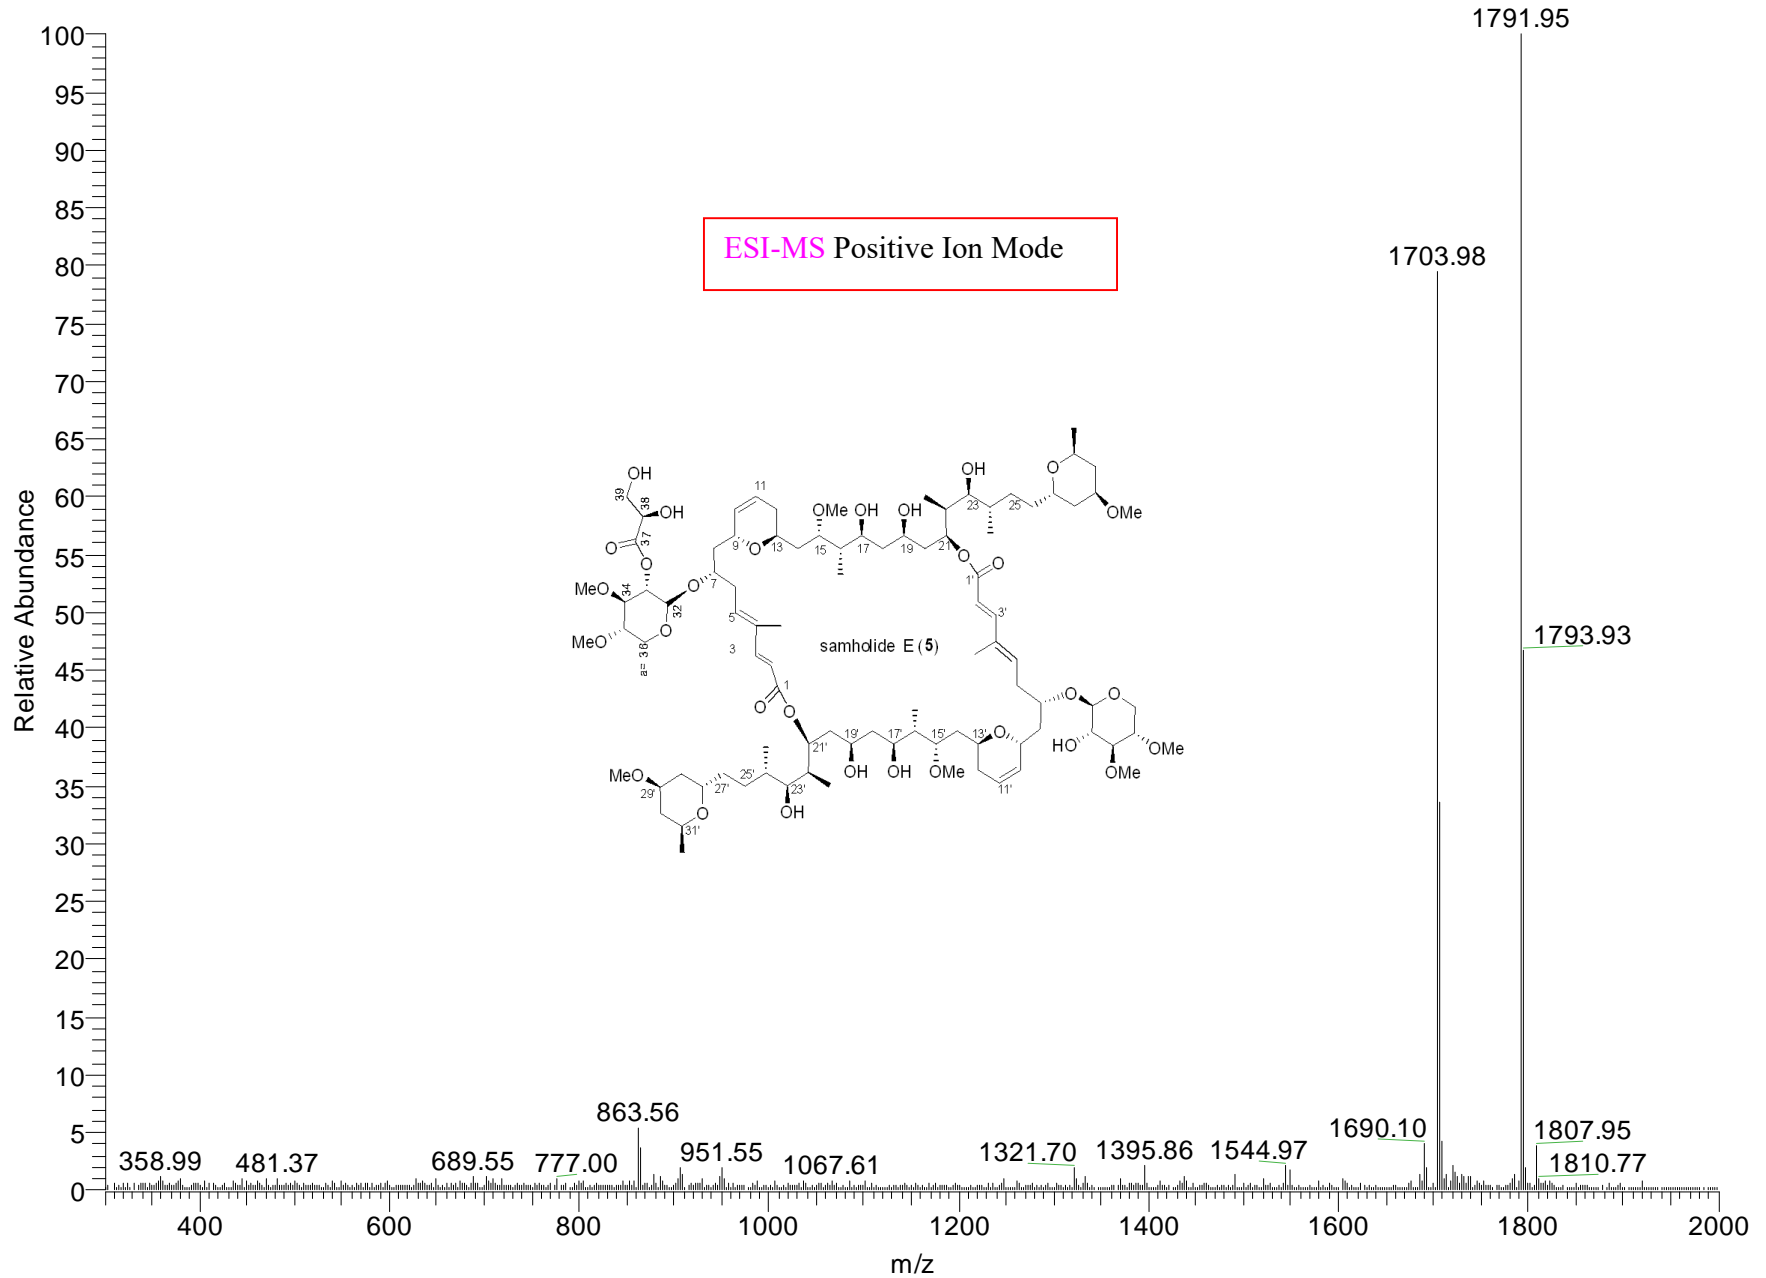

Figure S48 The ESI MS spectrum of samholide E (5)

E4-a #89-97 RT: 2.27-2.40 AV: 9 SB: 6 2.13-2.23 NL: 3.31E6  
T: +c Full ms2 1792.00@35.00 [490.00-2000.00]

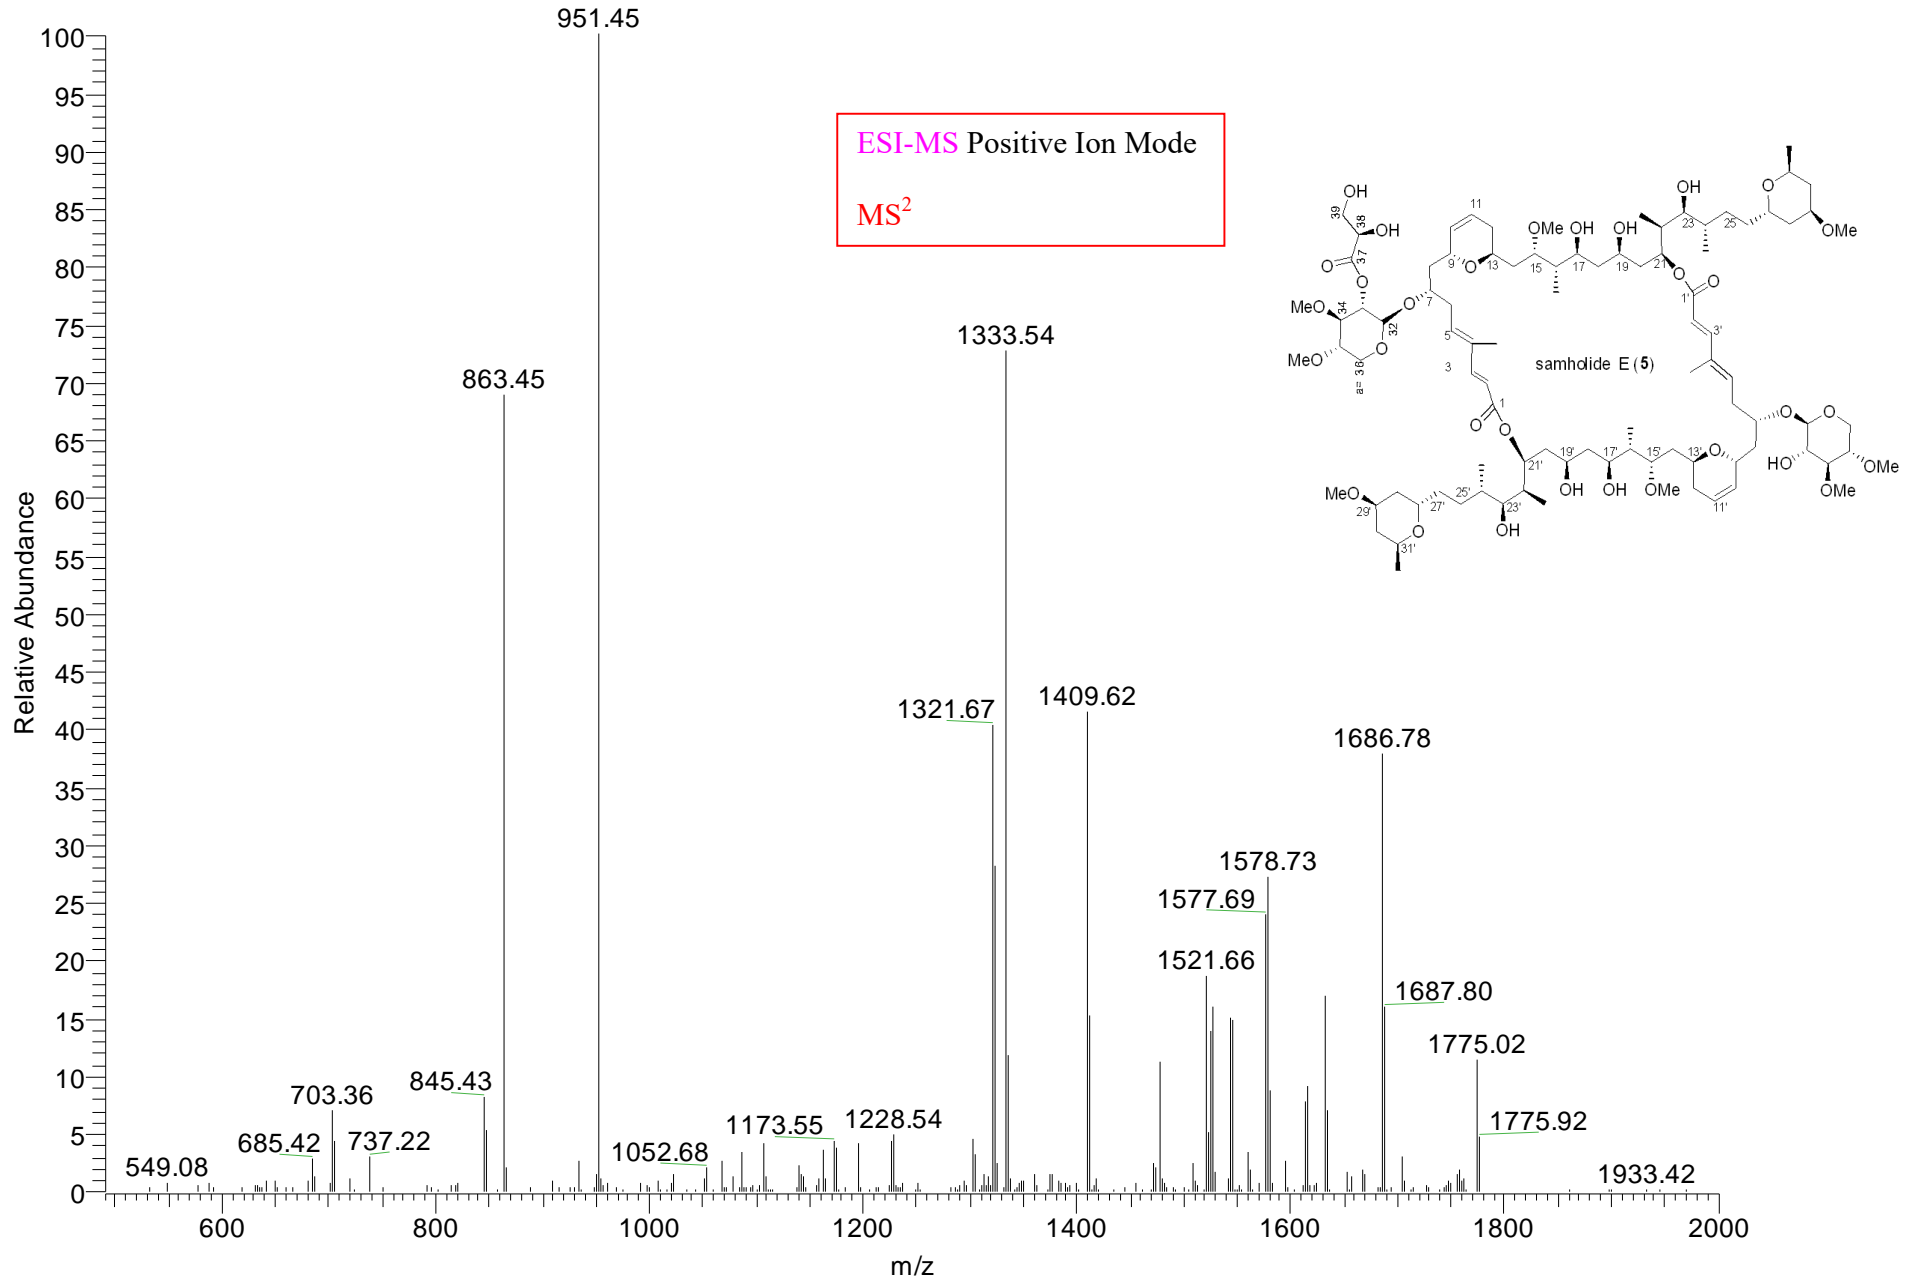

Figure S49 The ESI MS<sup>2</sup> spectrum of samholide E (5)



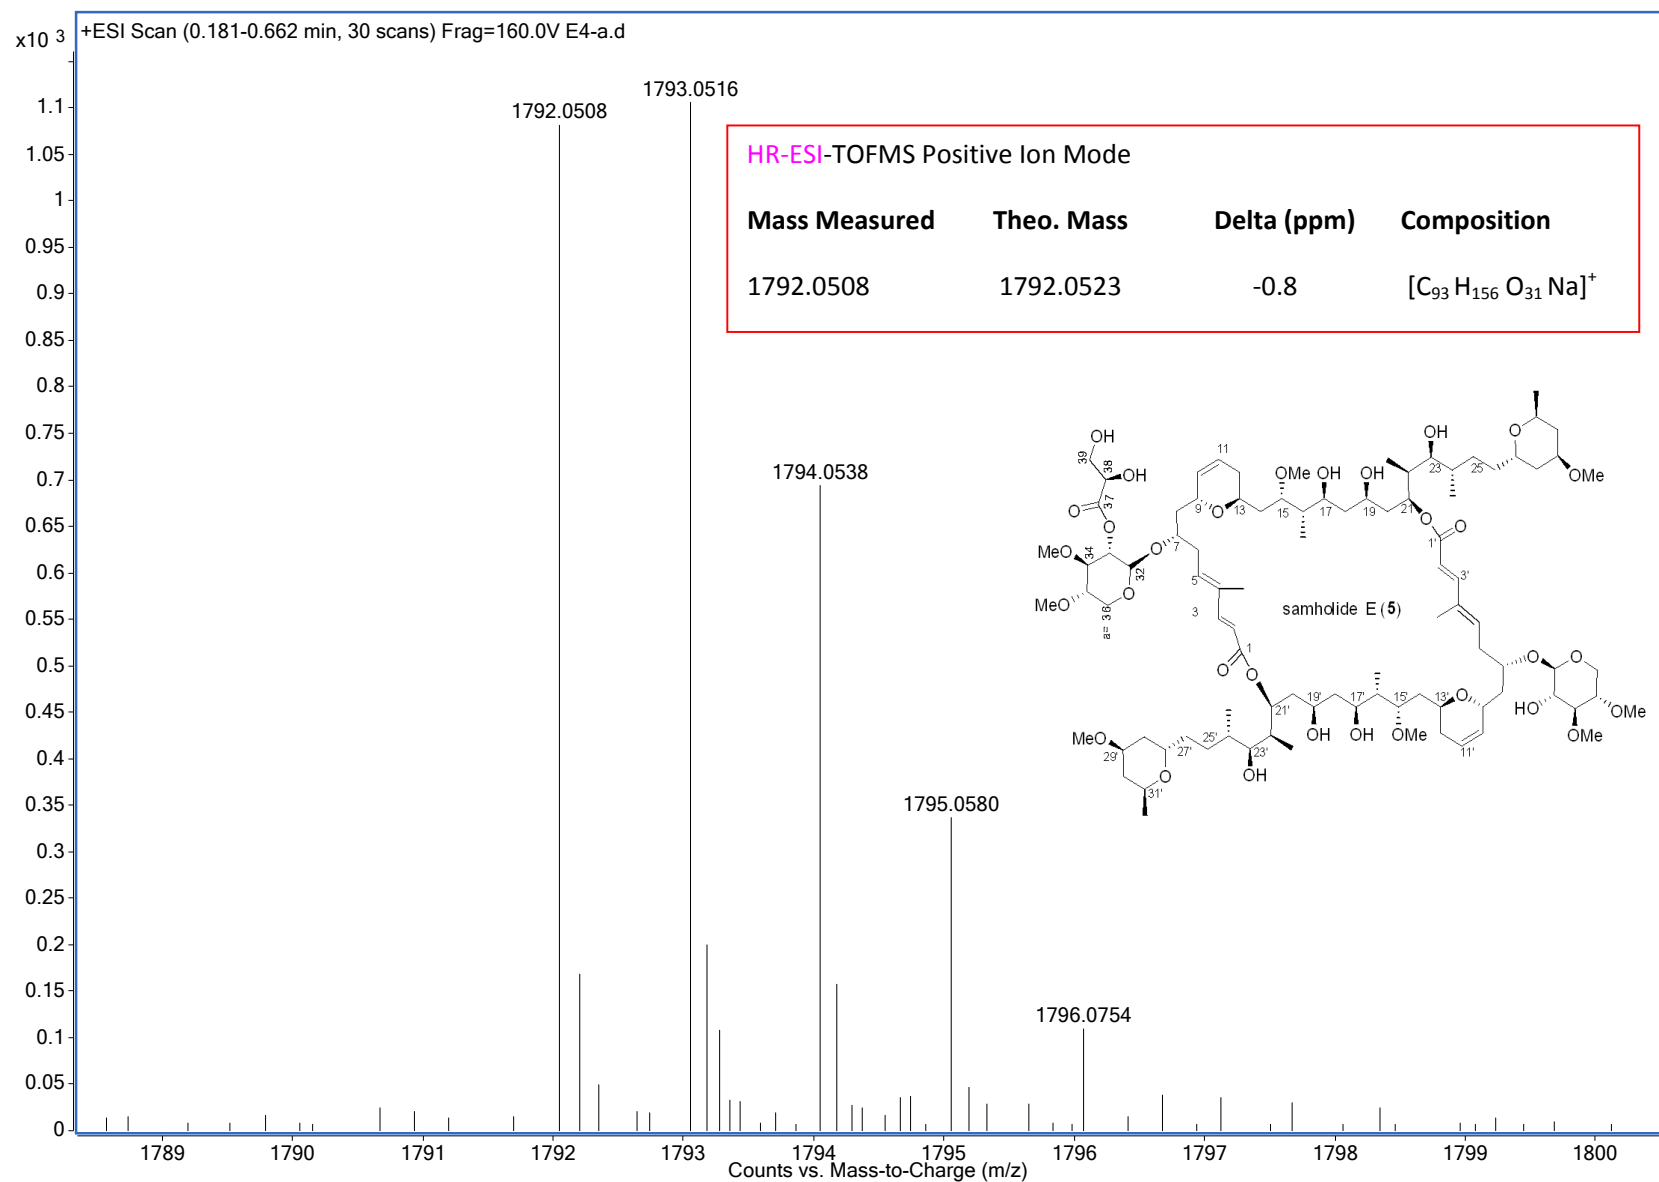

Figure S50 The positive HRESIMS spectrum of samholide E (5)

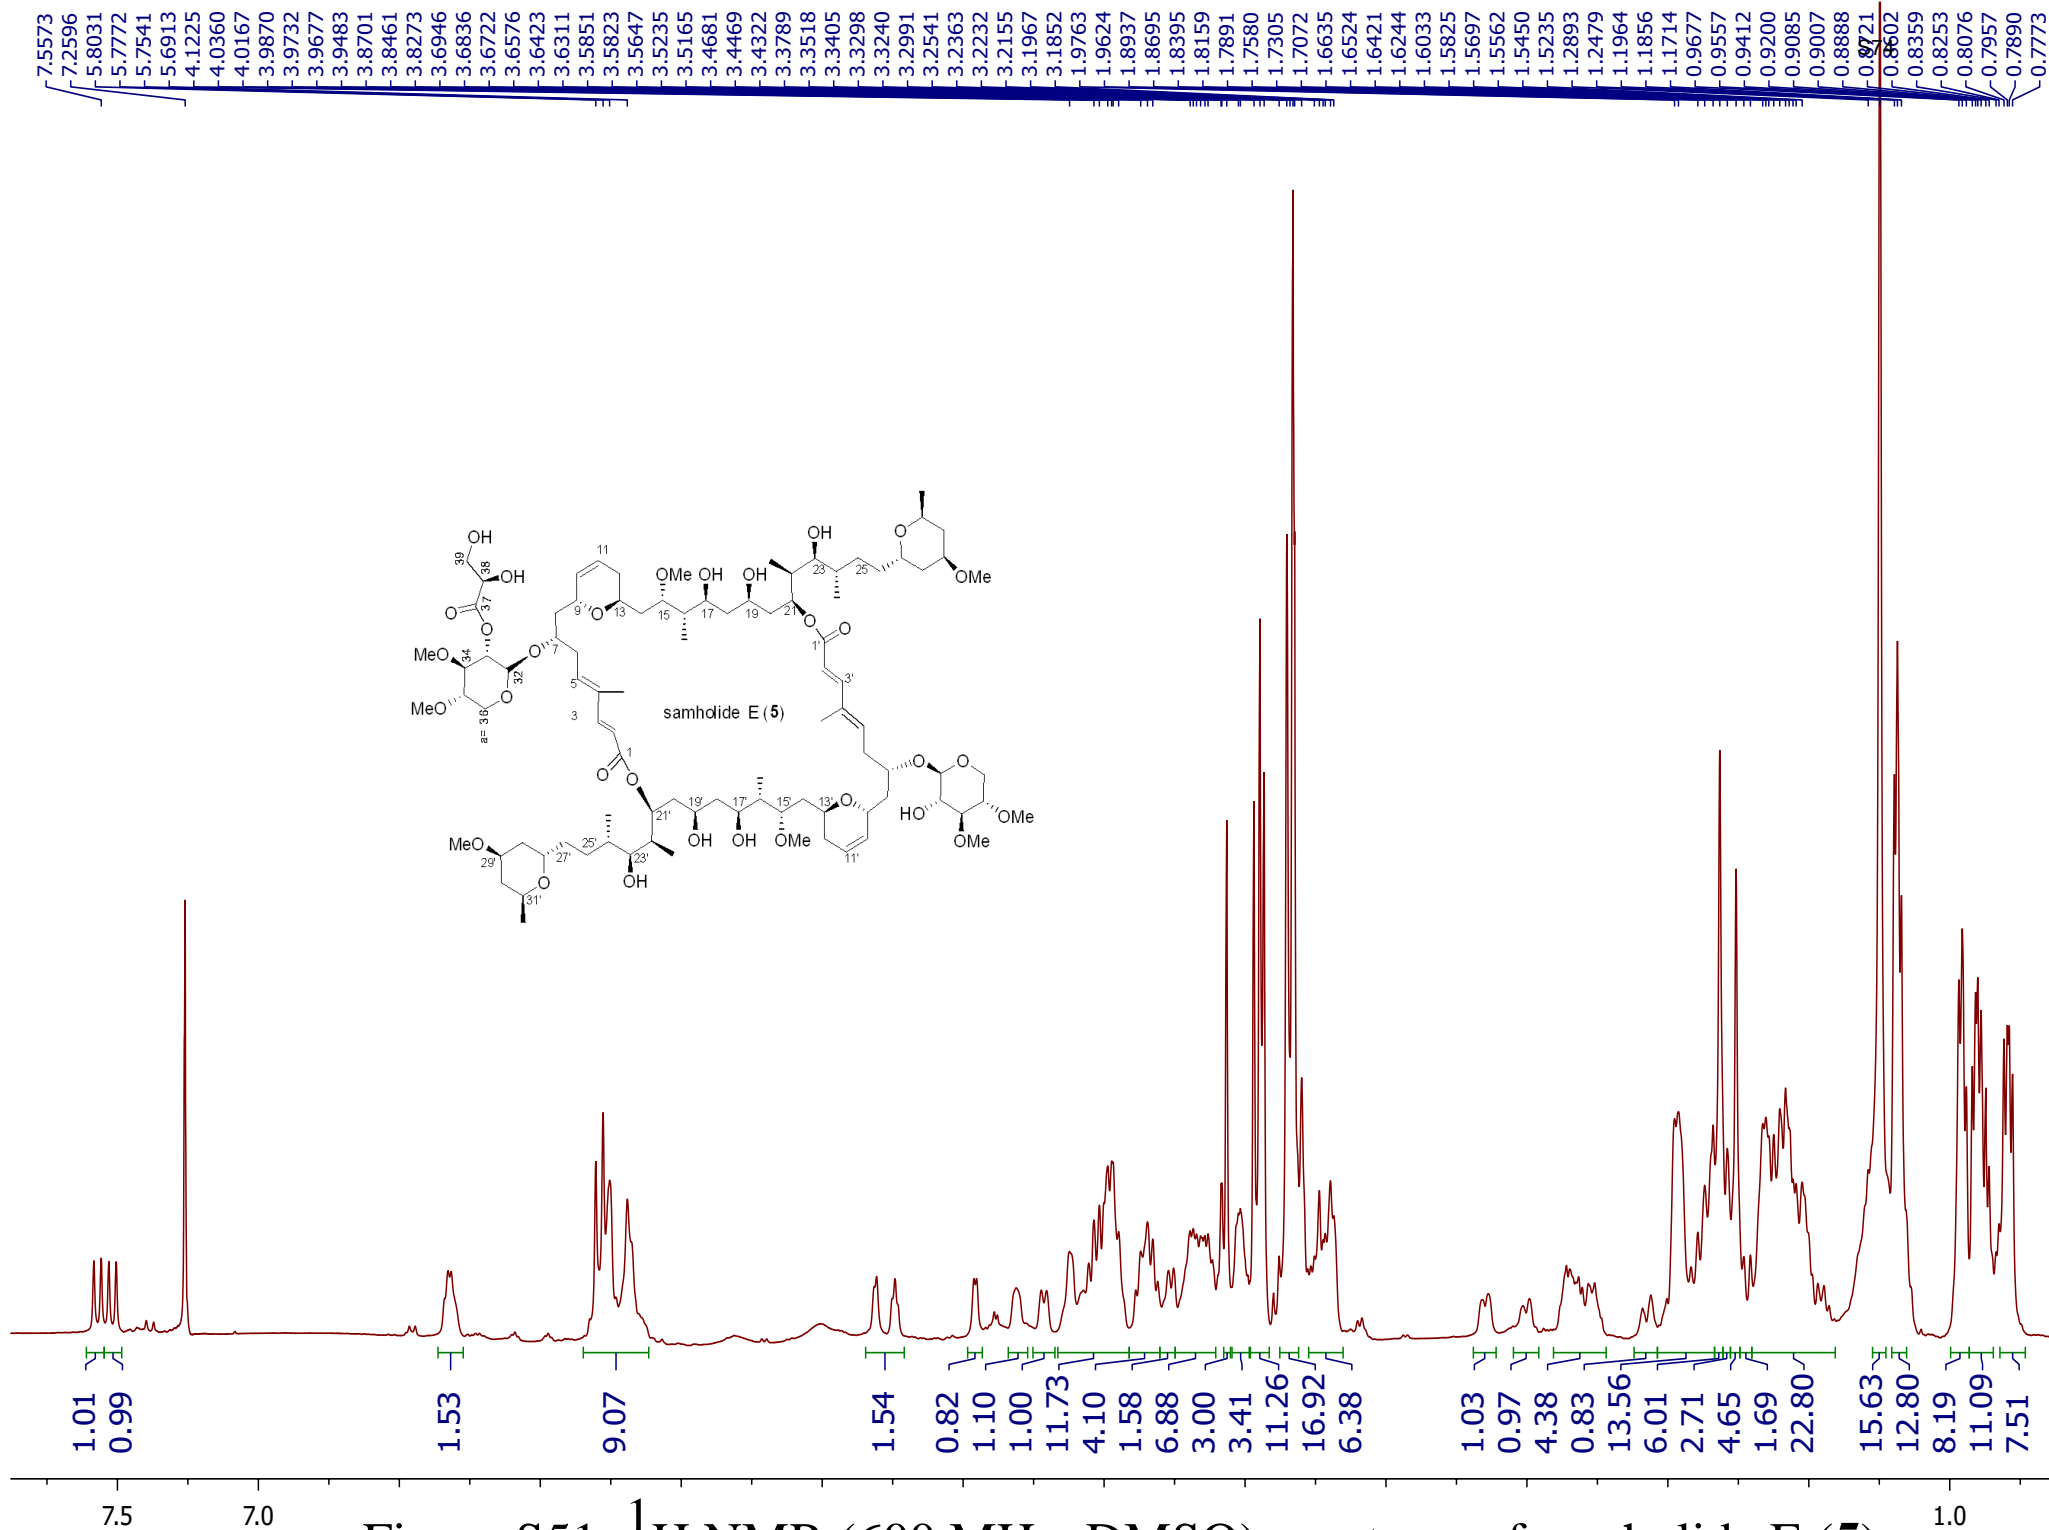

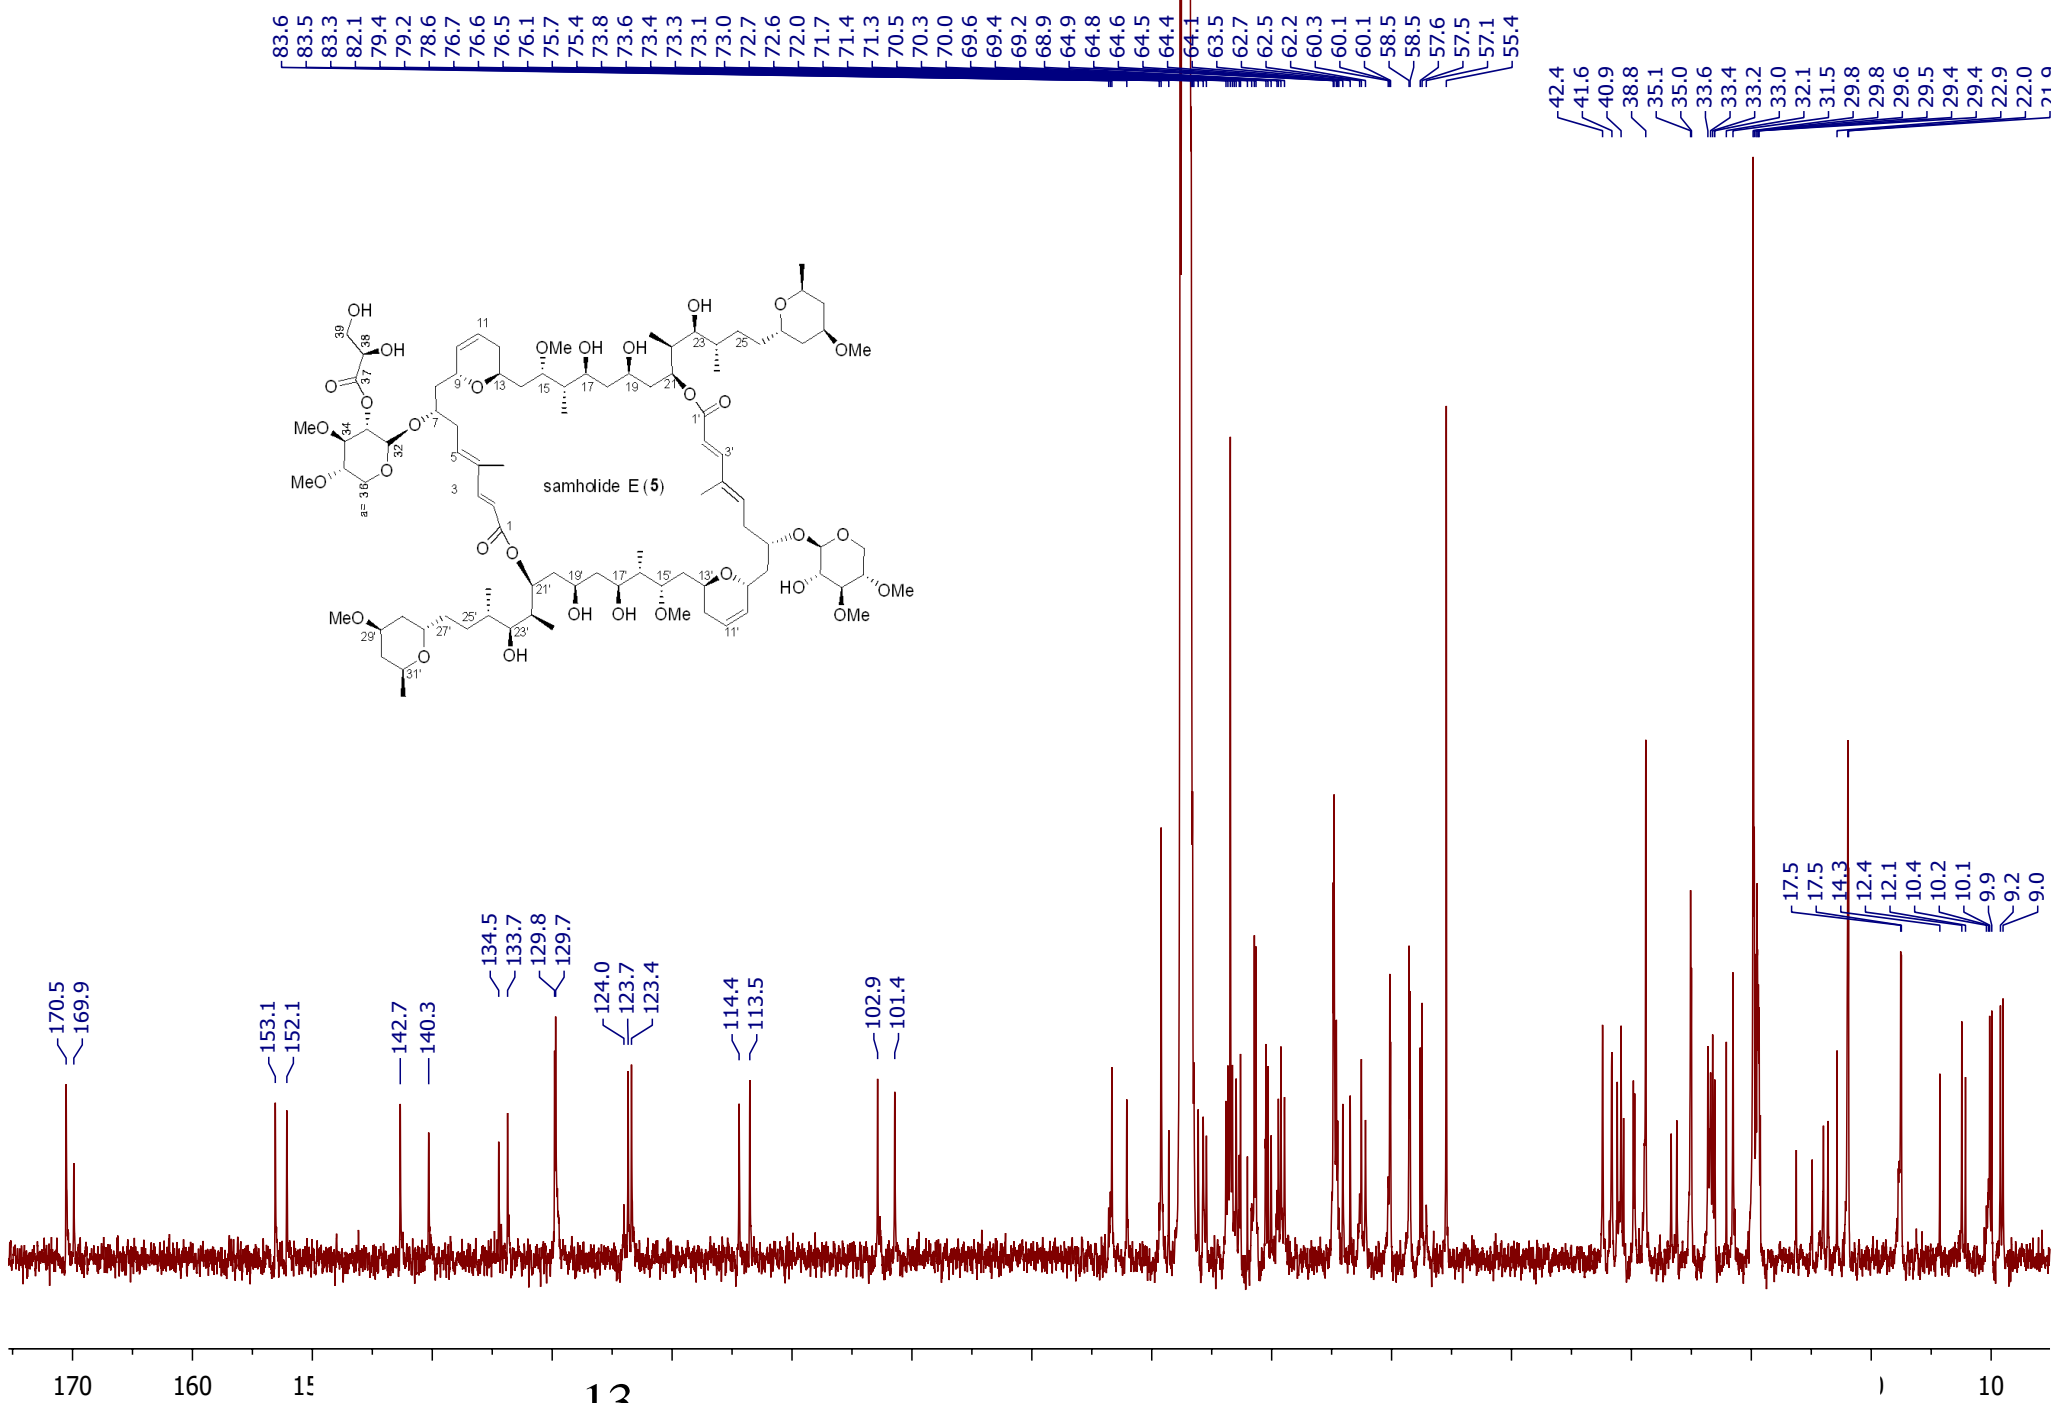

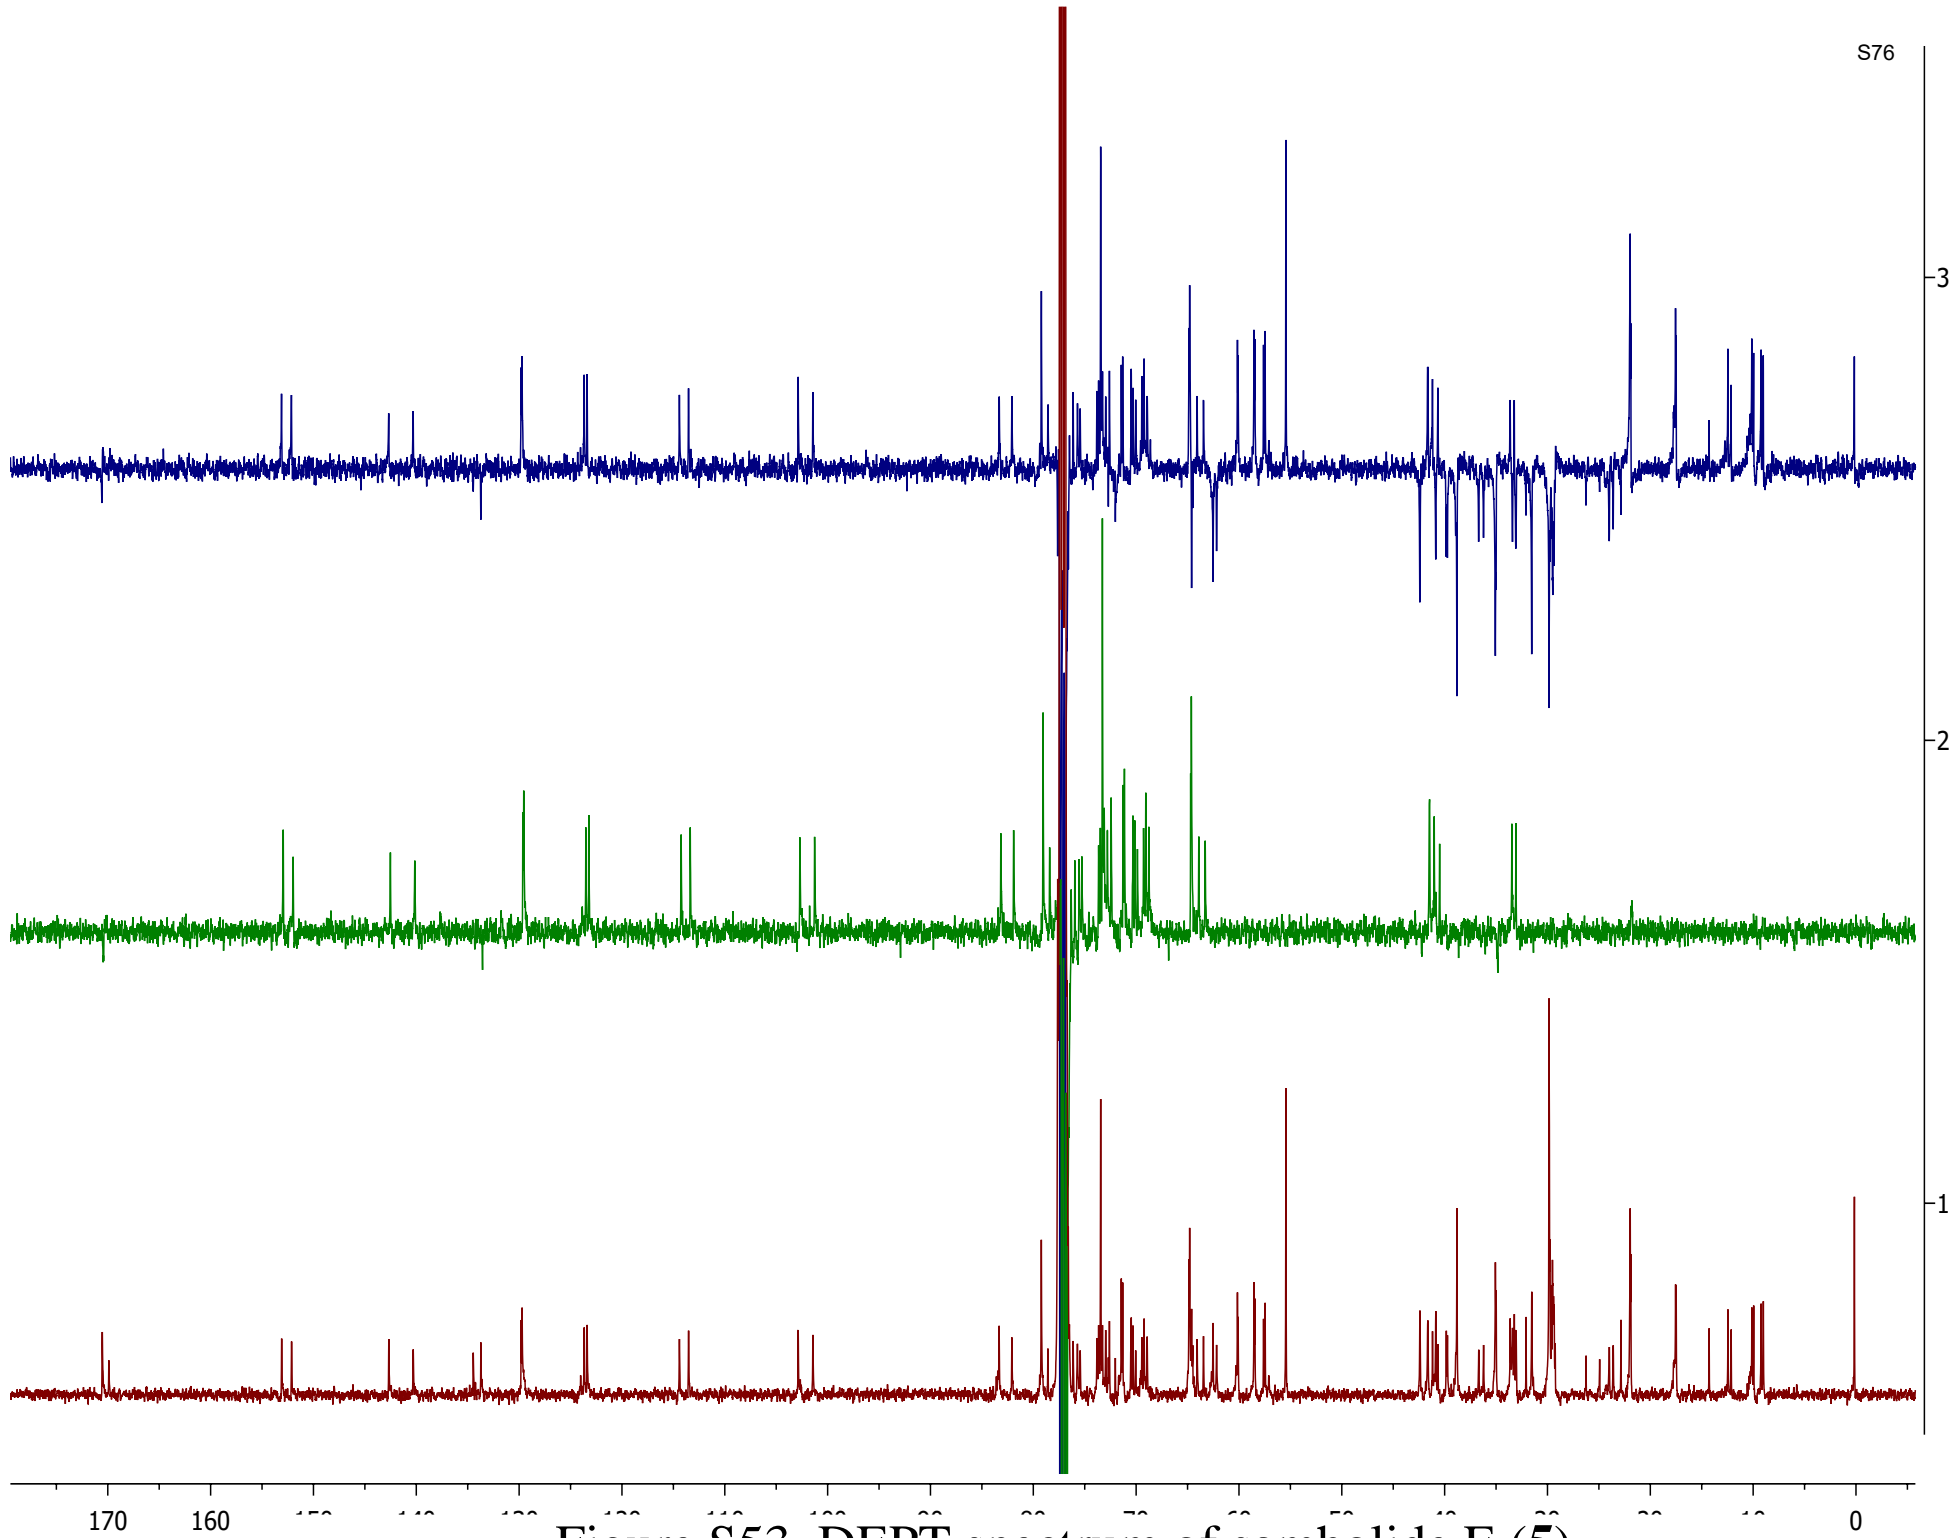

Figure S53 DEPT spectrum of samholide E (5)

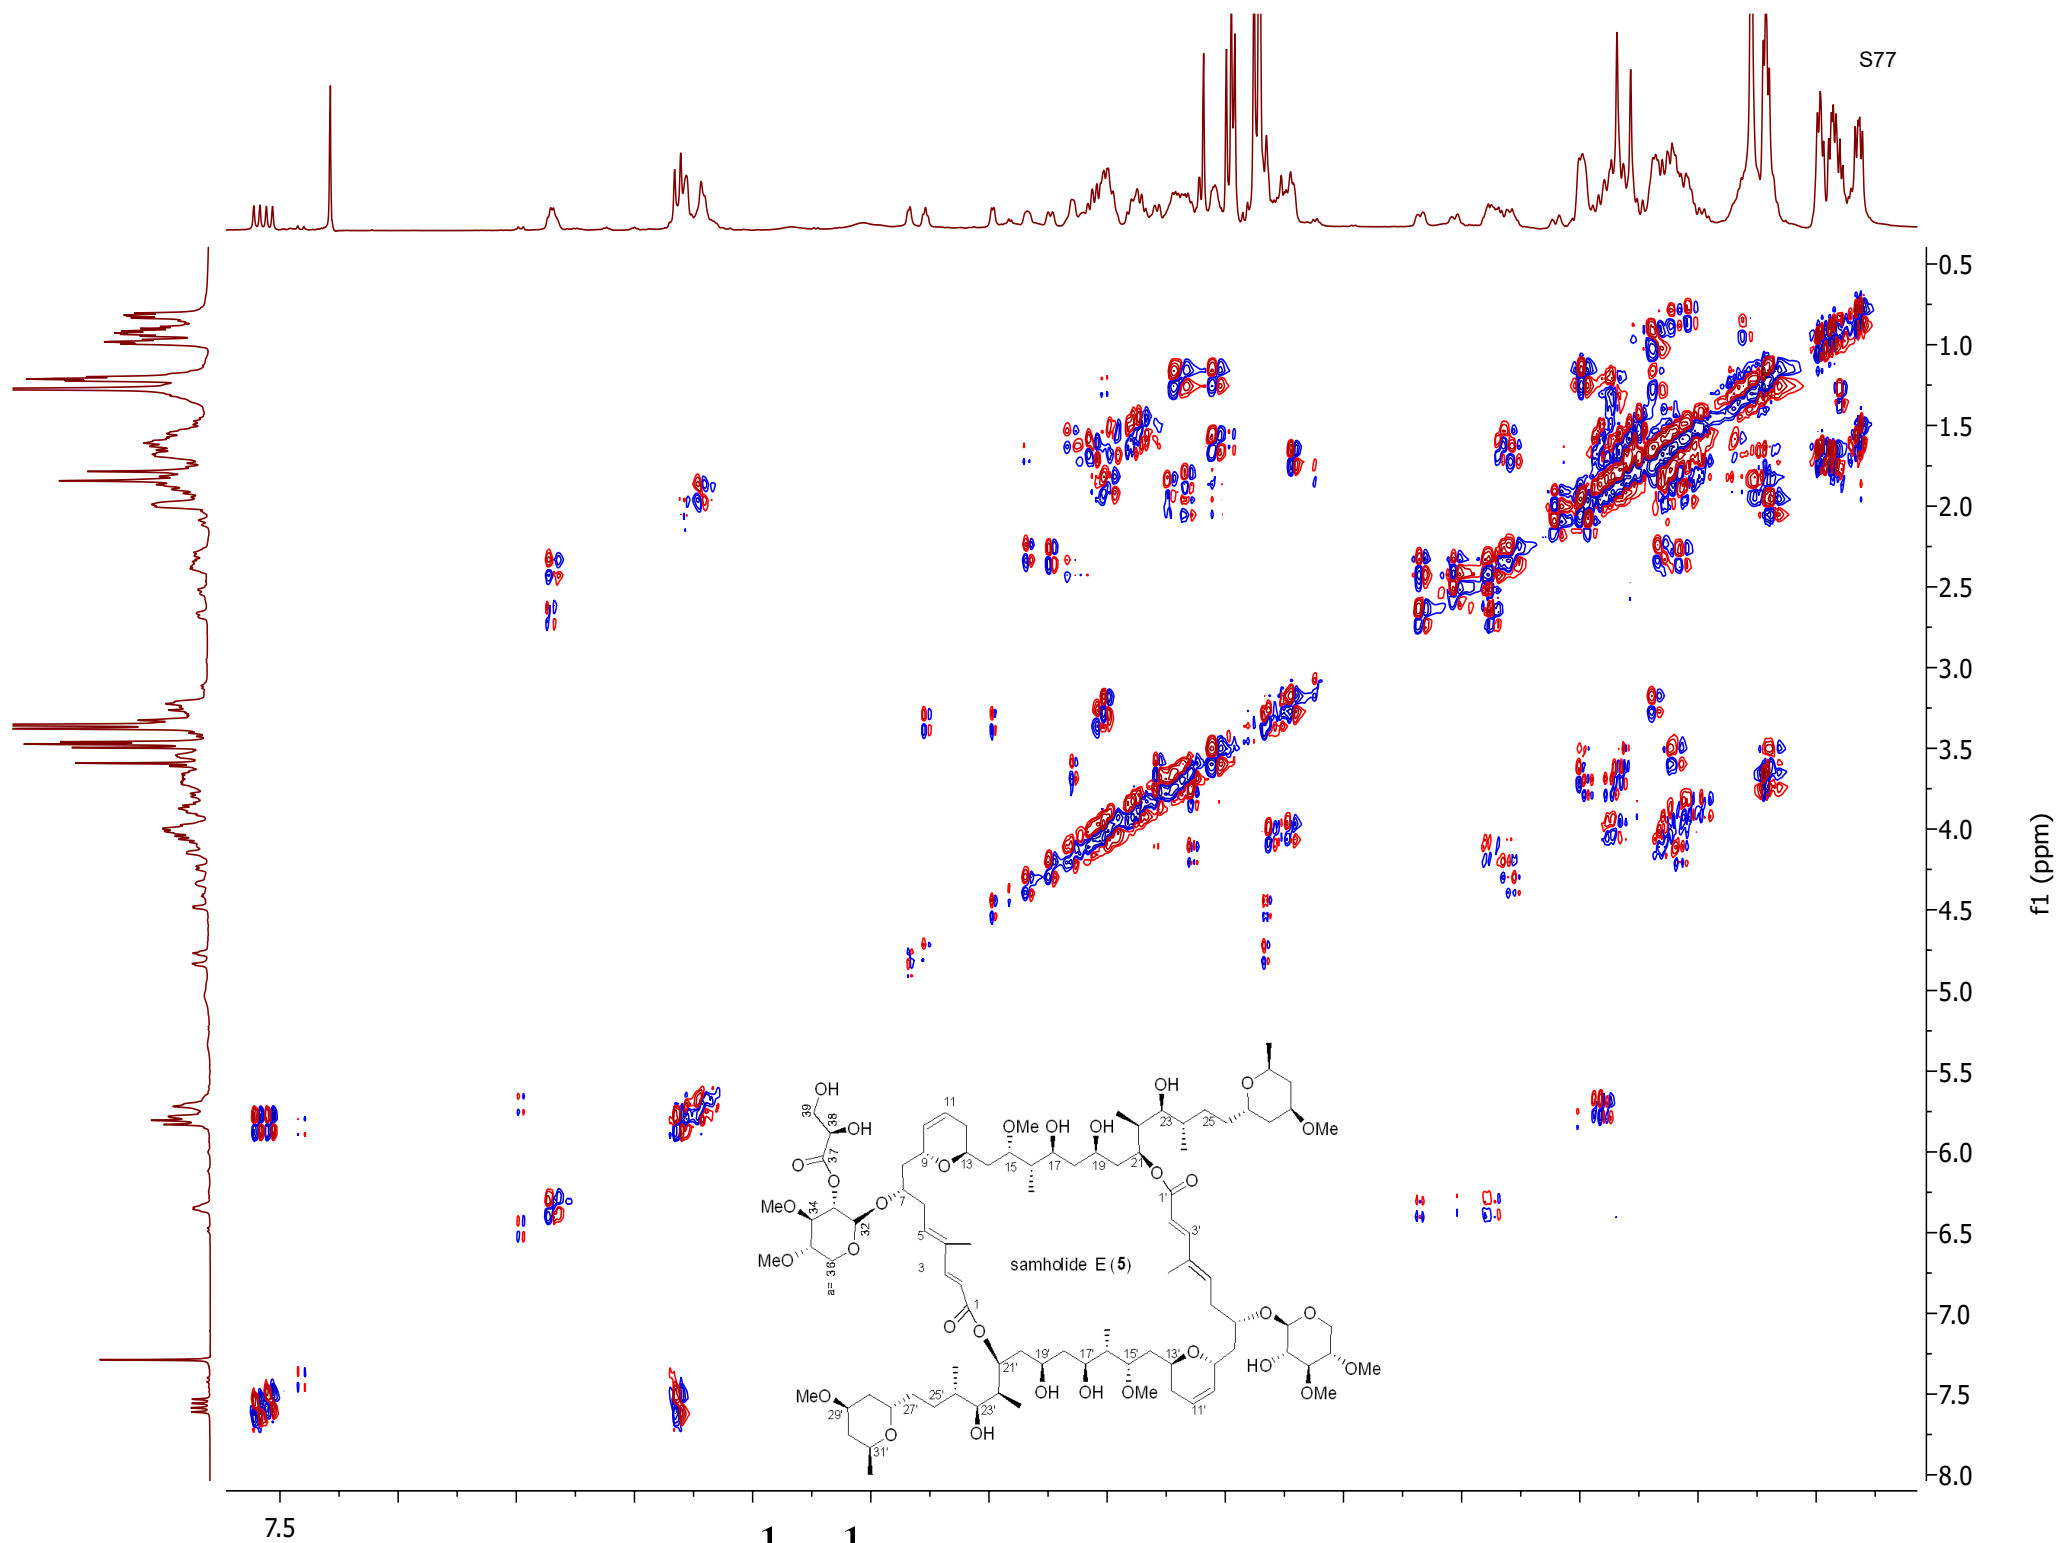

Figure S54  $^1\text{H}$ - $^1\text{H}$  COSY spectrum of samholide E (5)

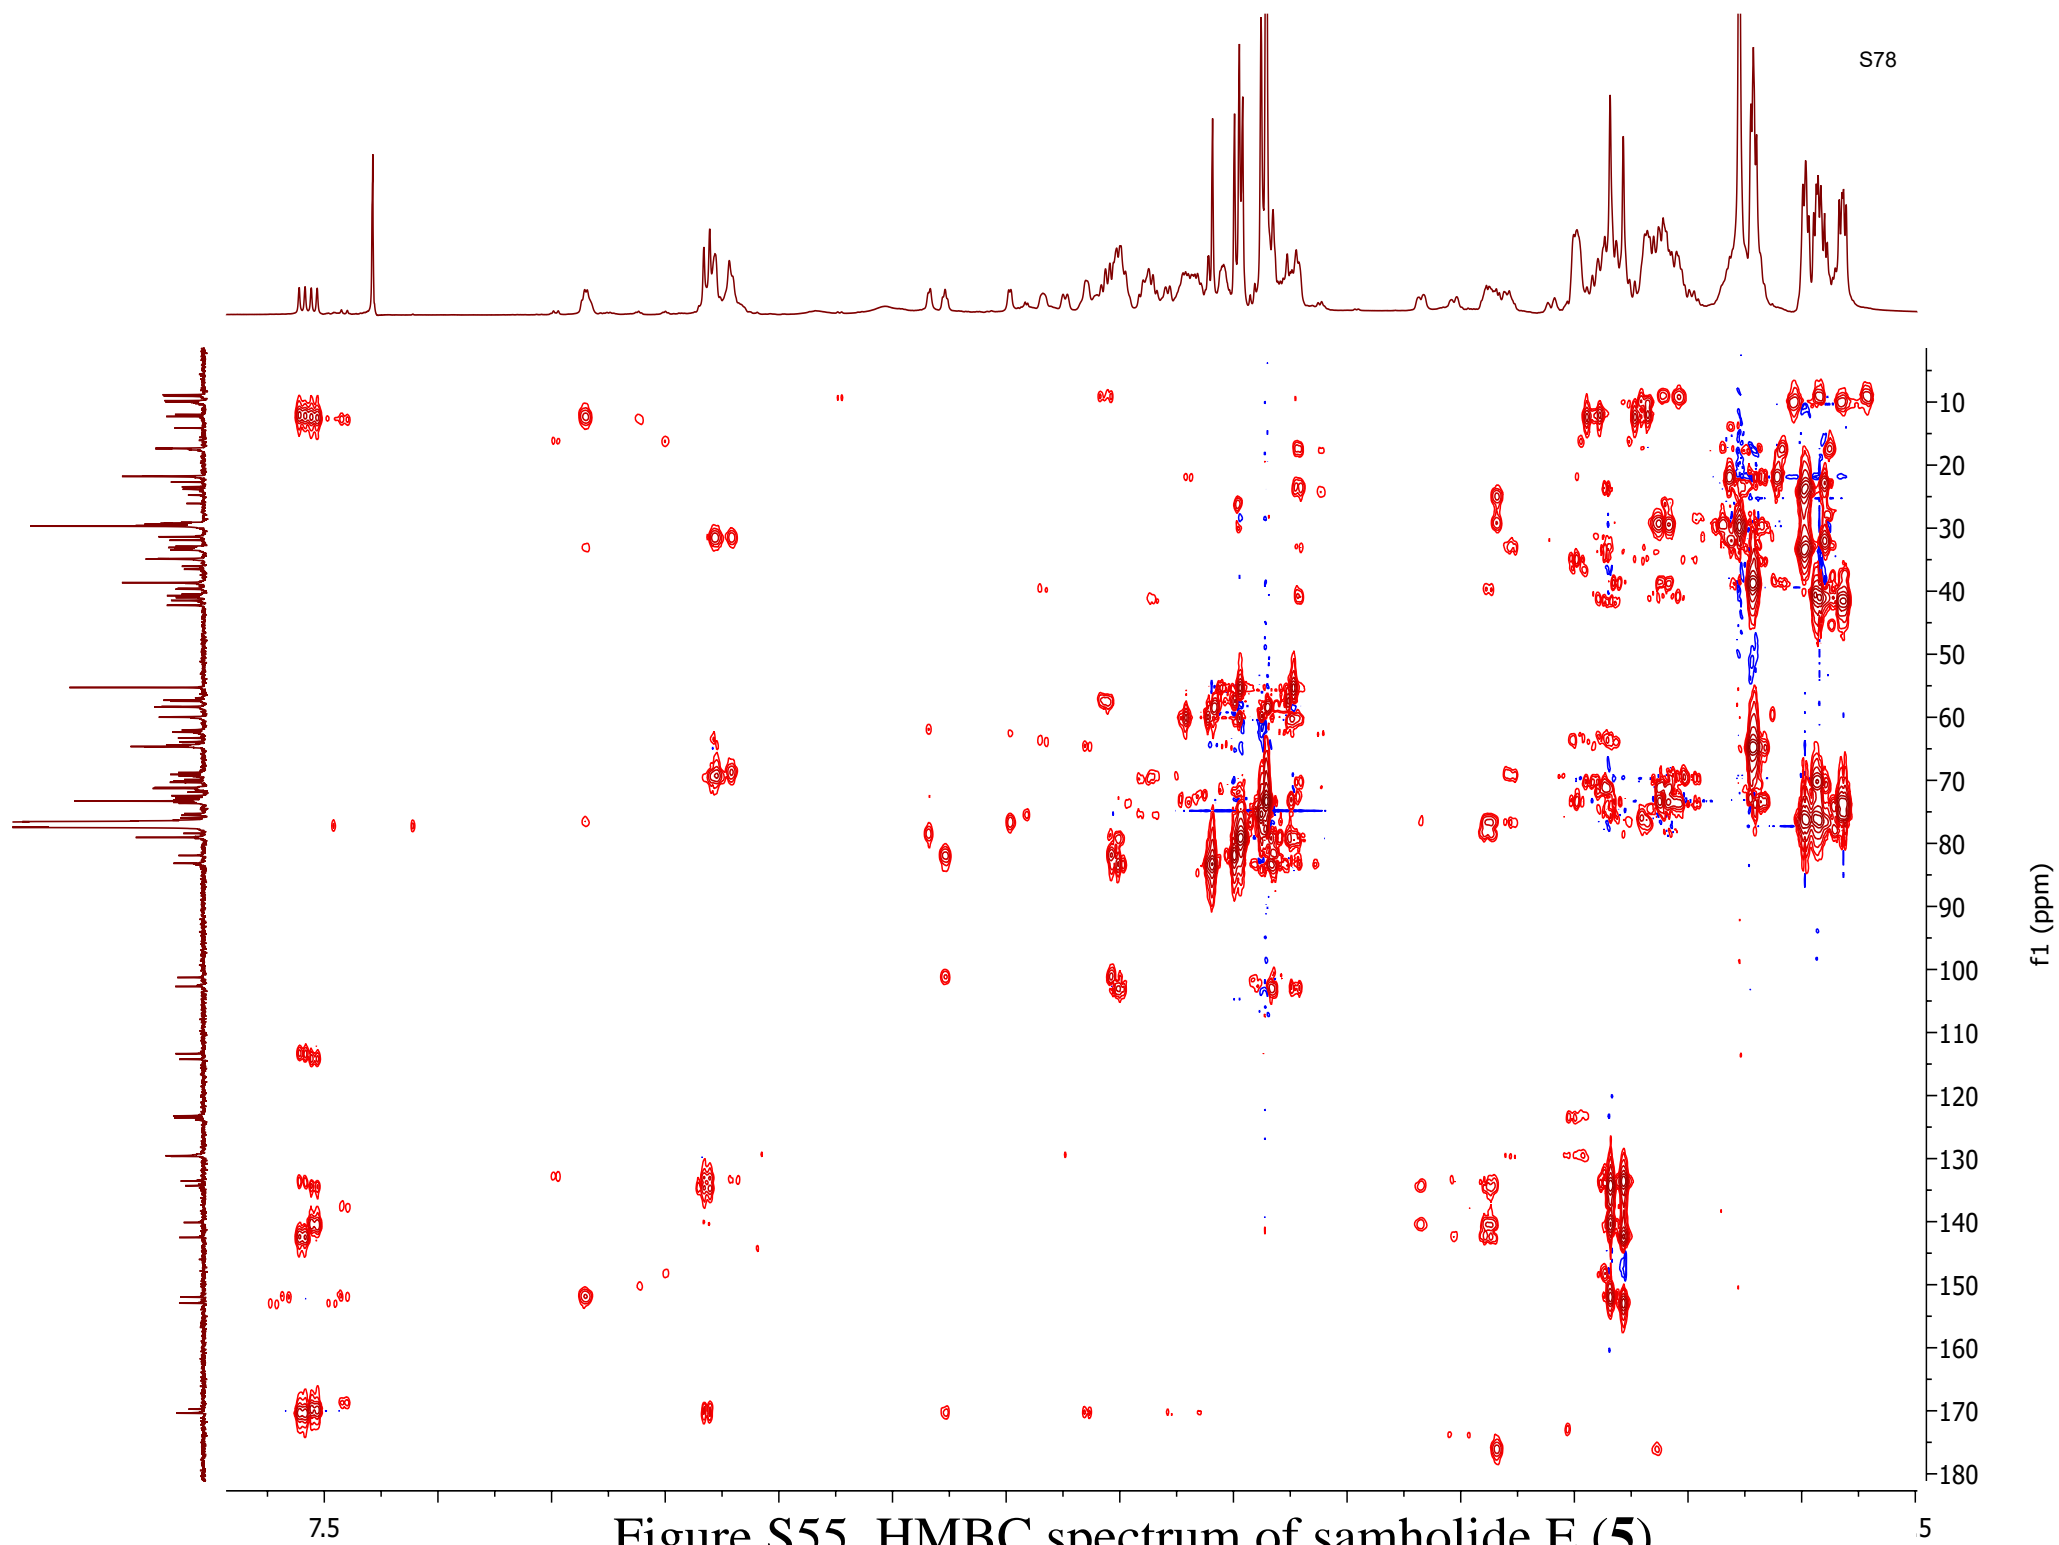

Figure S55 HMBC spectrum of samholide E (5)

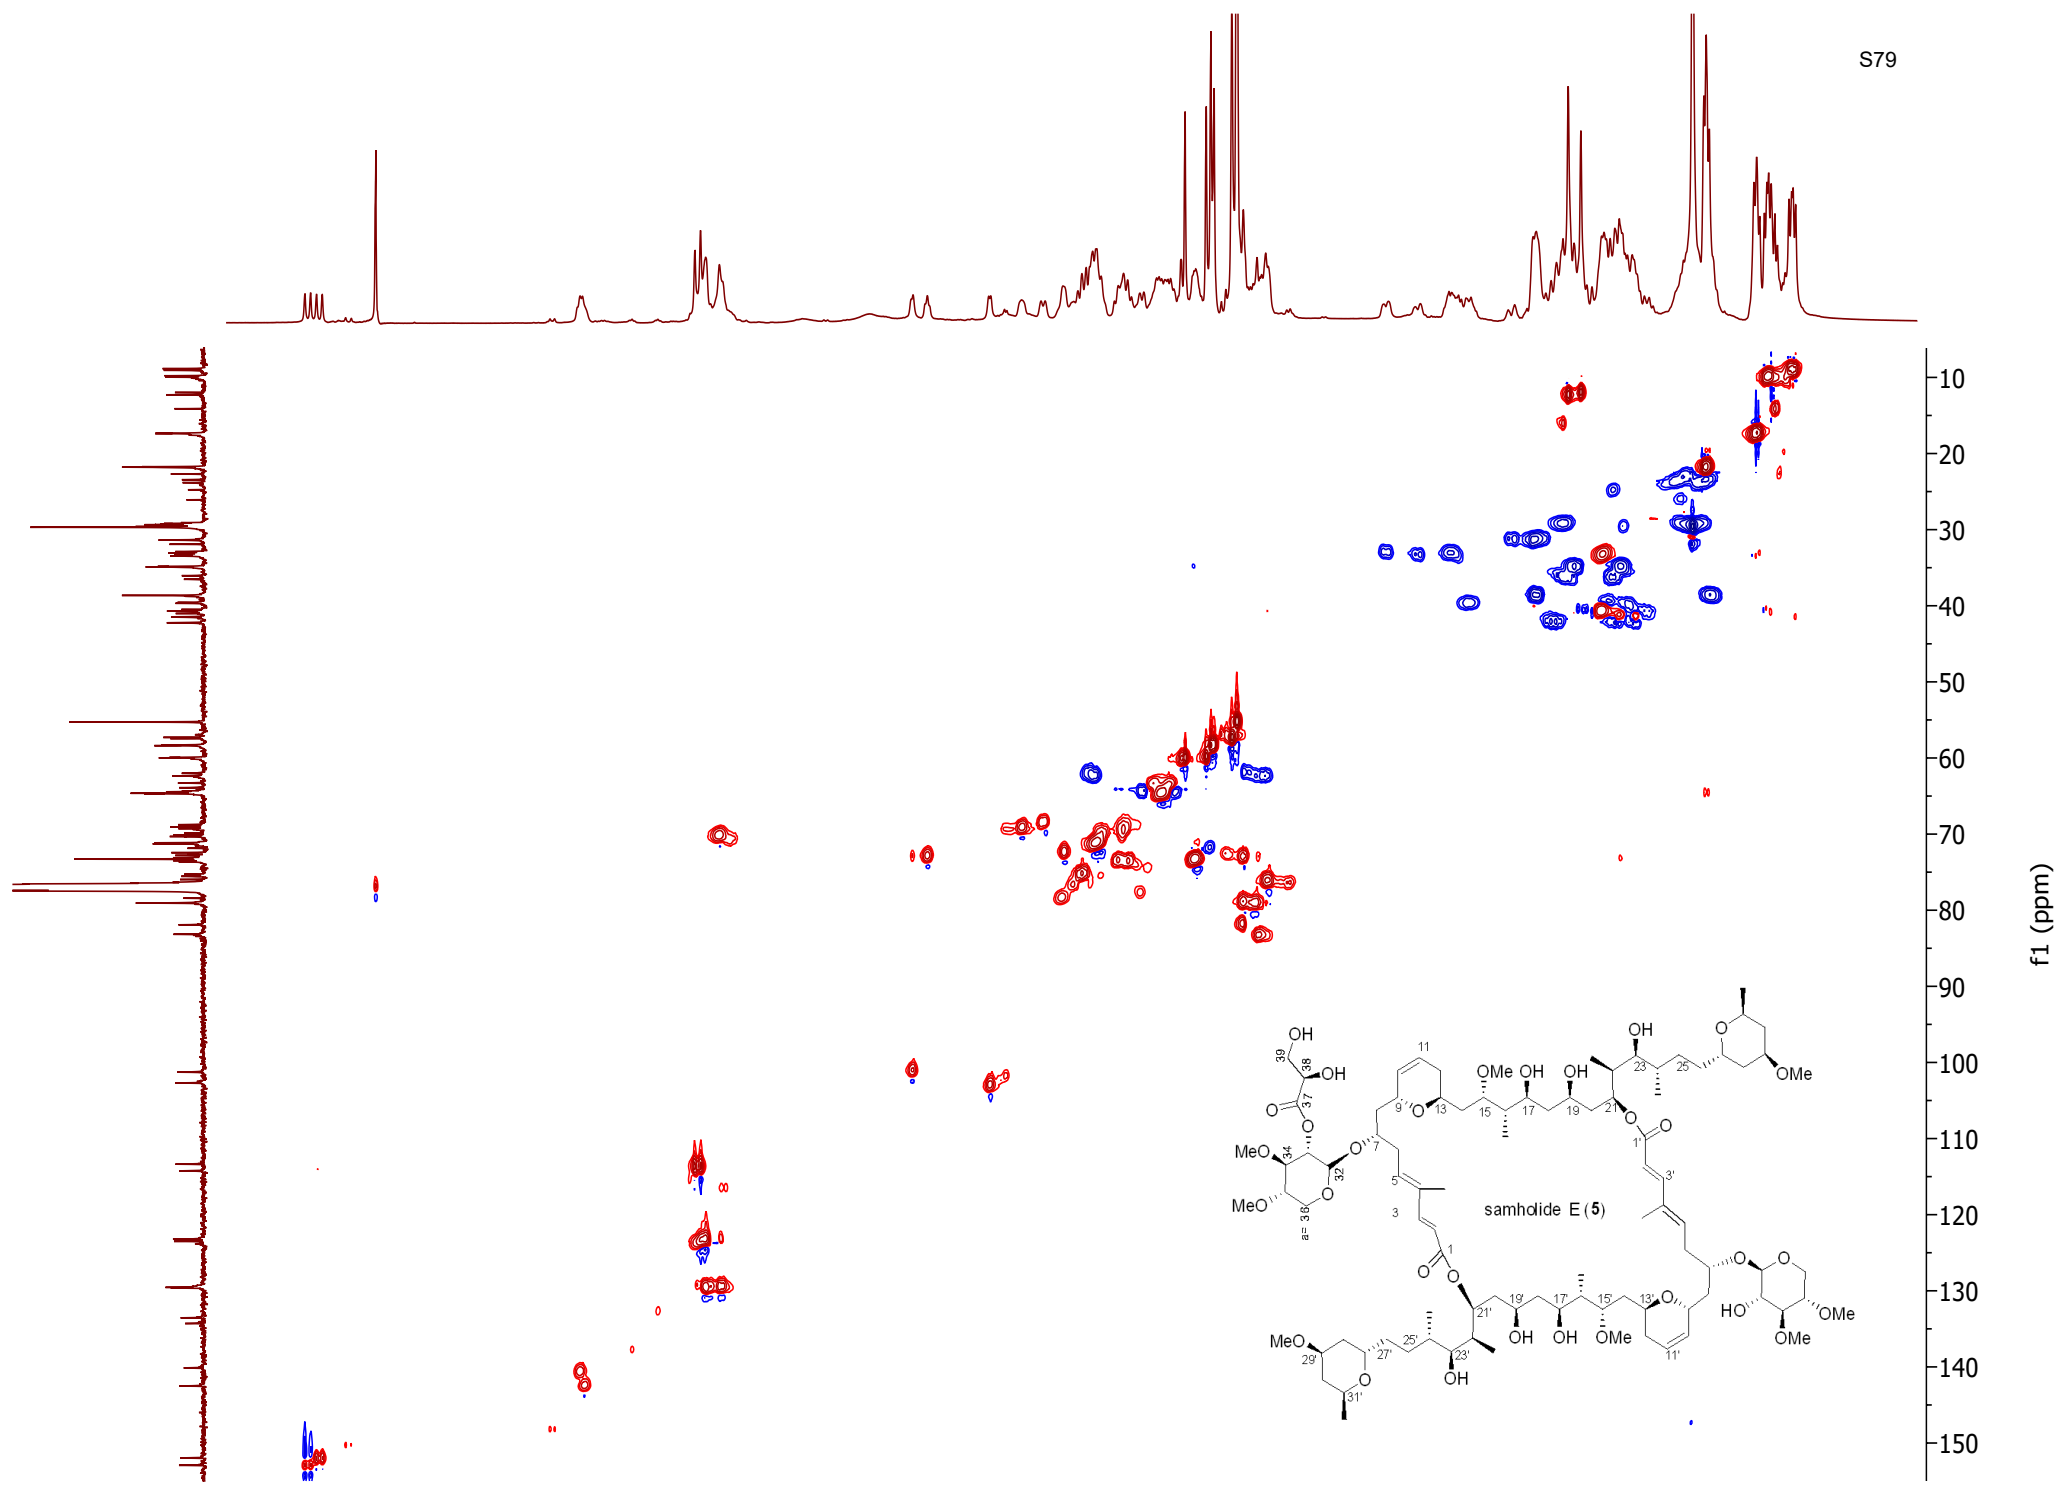

Figure S56 HMBC spectrum of samholide E (5)

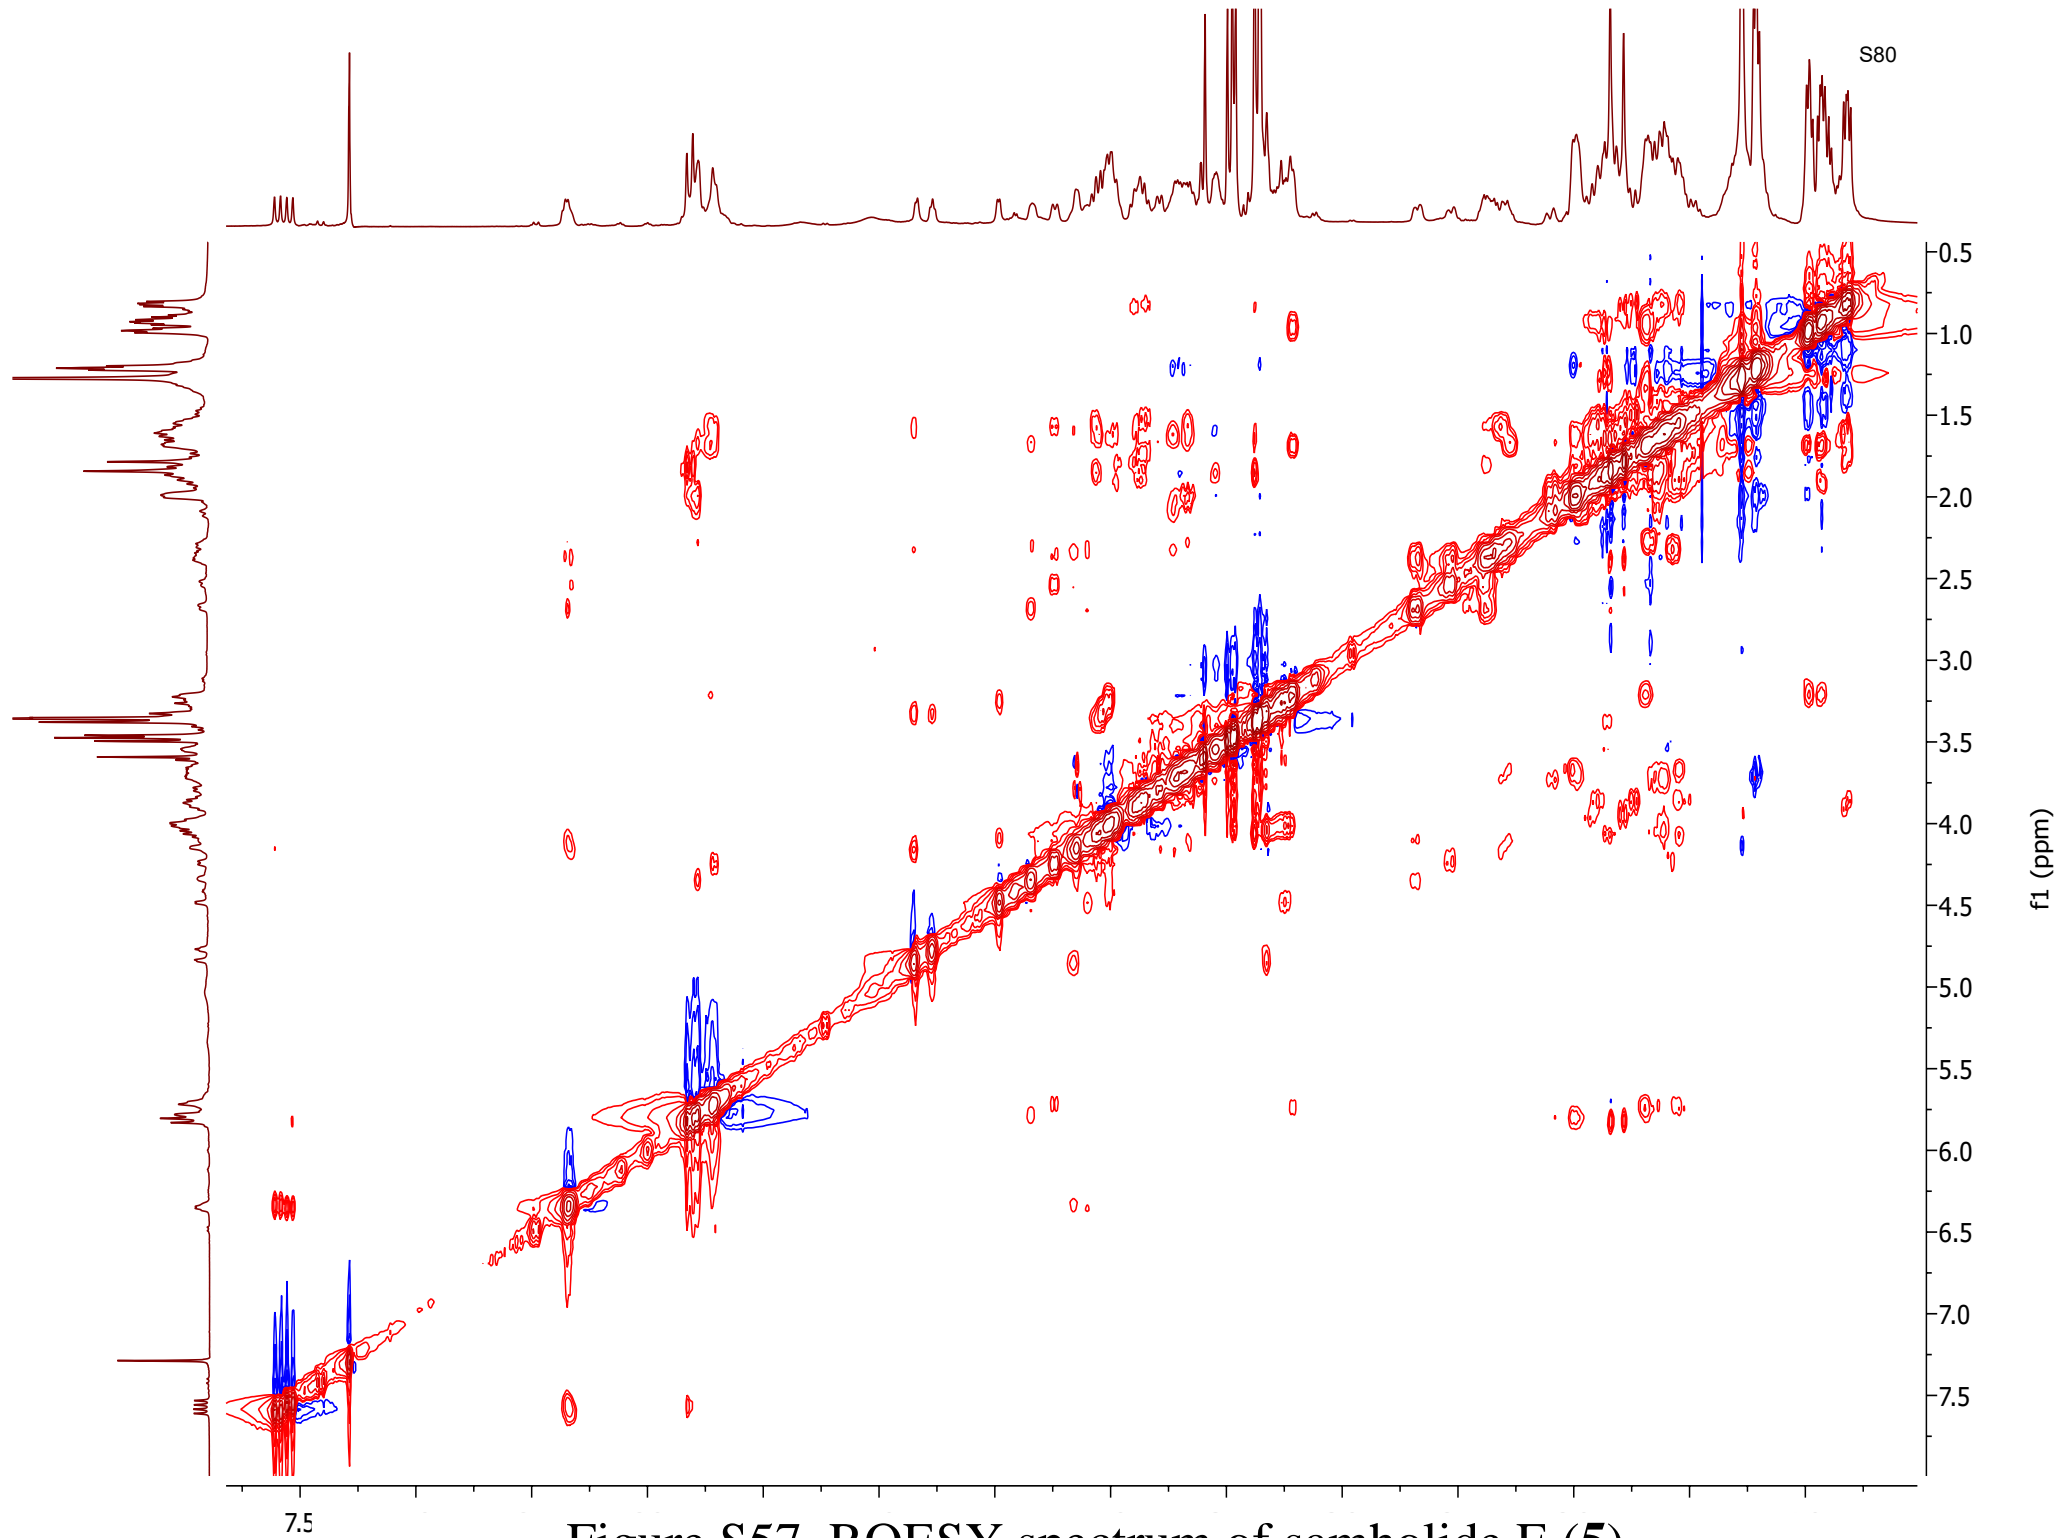

Figure S57 ROESY spectrum of samholide E (5)



2226H3C7A1-a #9-13 RT: 0.23-0.33 AV: 5 SB: 3 0.08-0.13 NL: 2.09E6  
T: + c Full ms [ 200.00-2000.00]

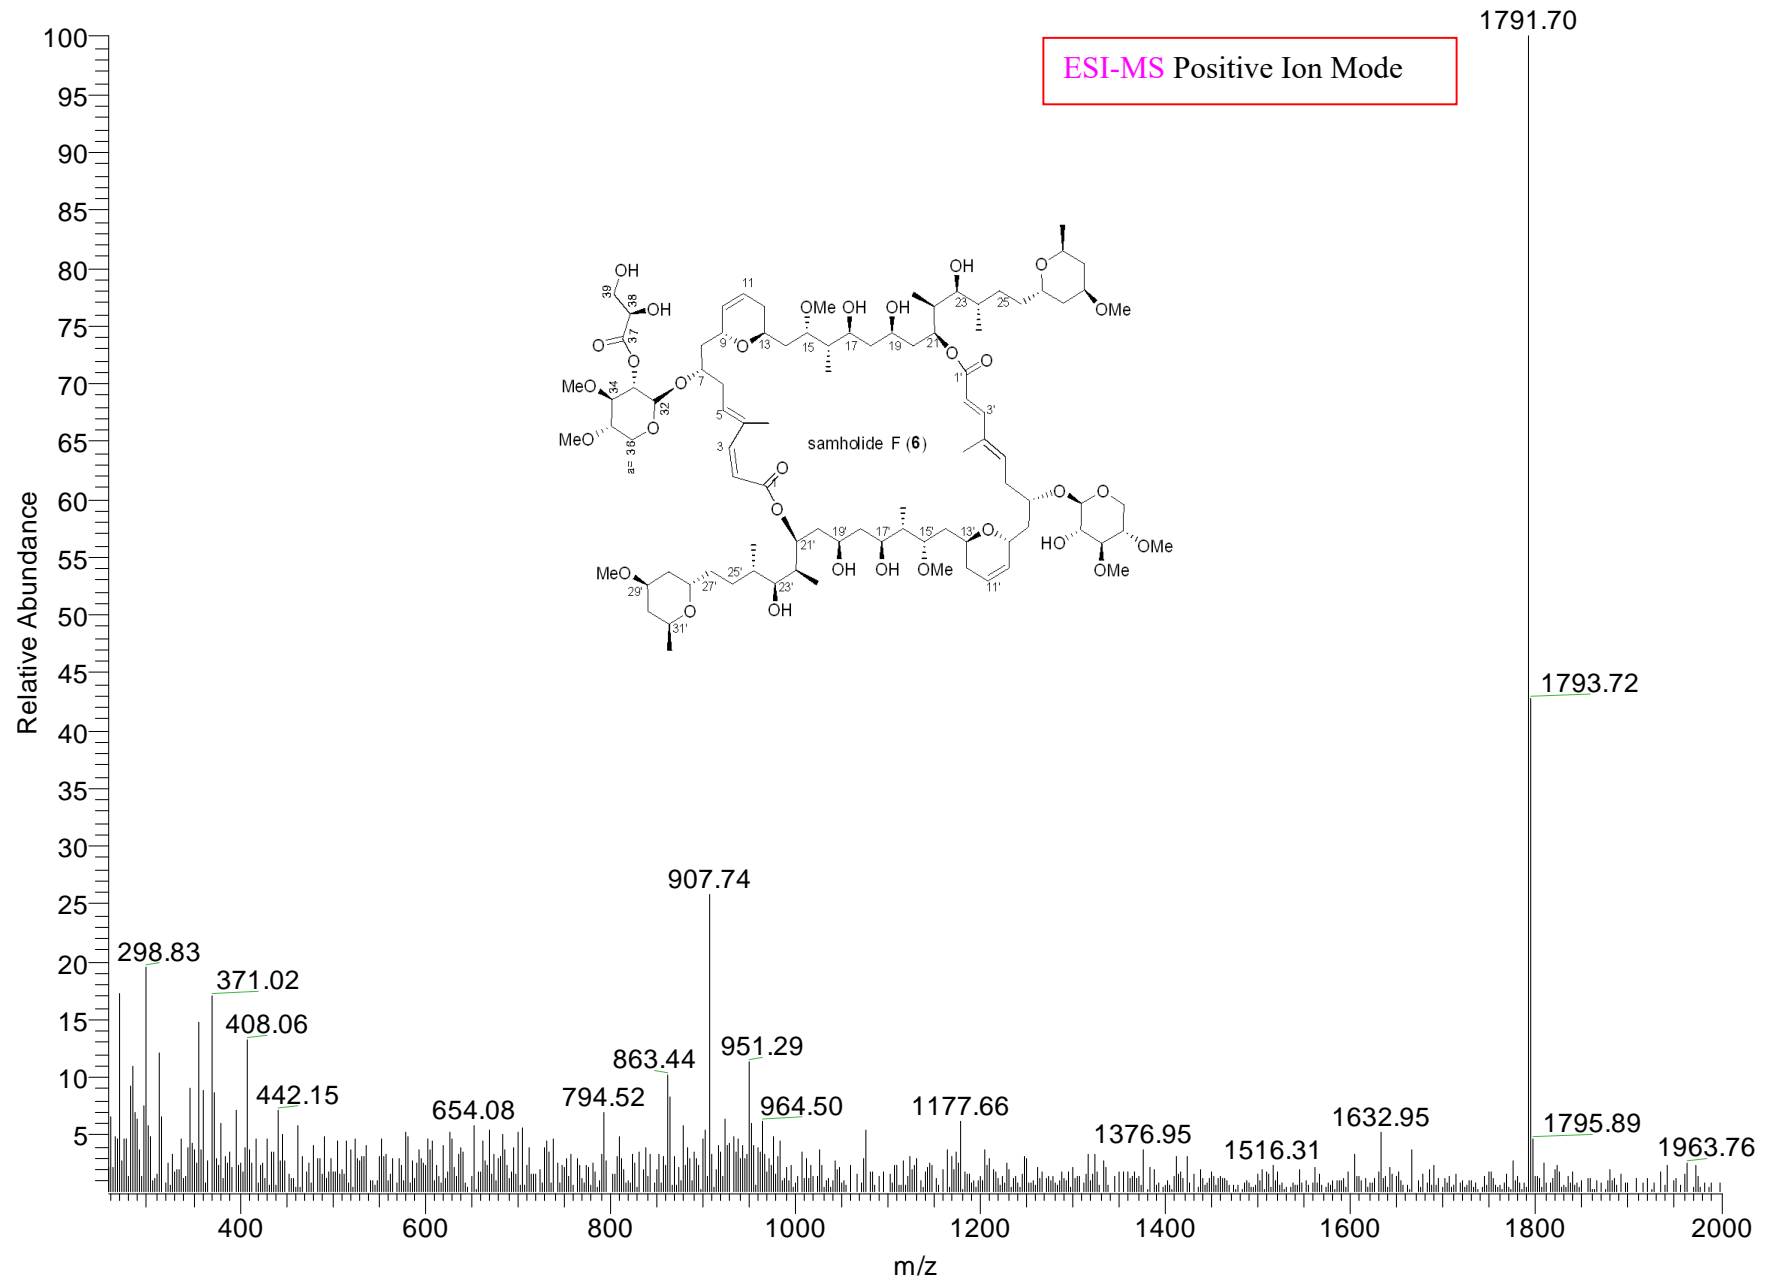

Figure S58 The ESI MS spectrum of samholide F (6)

2226H3C7A1-a #25-28 RT: 0.61-0.66 AV: 4 NL: 1.93E6  
F: + c Full ms2 1792.00@35.00 [490.00-2000.00]

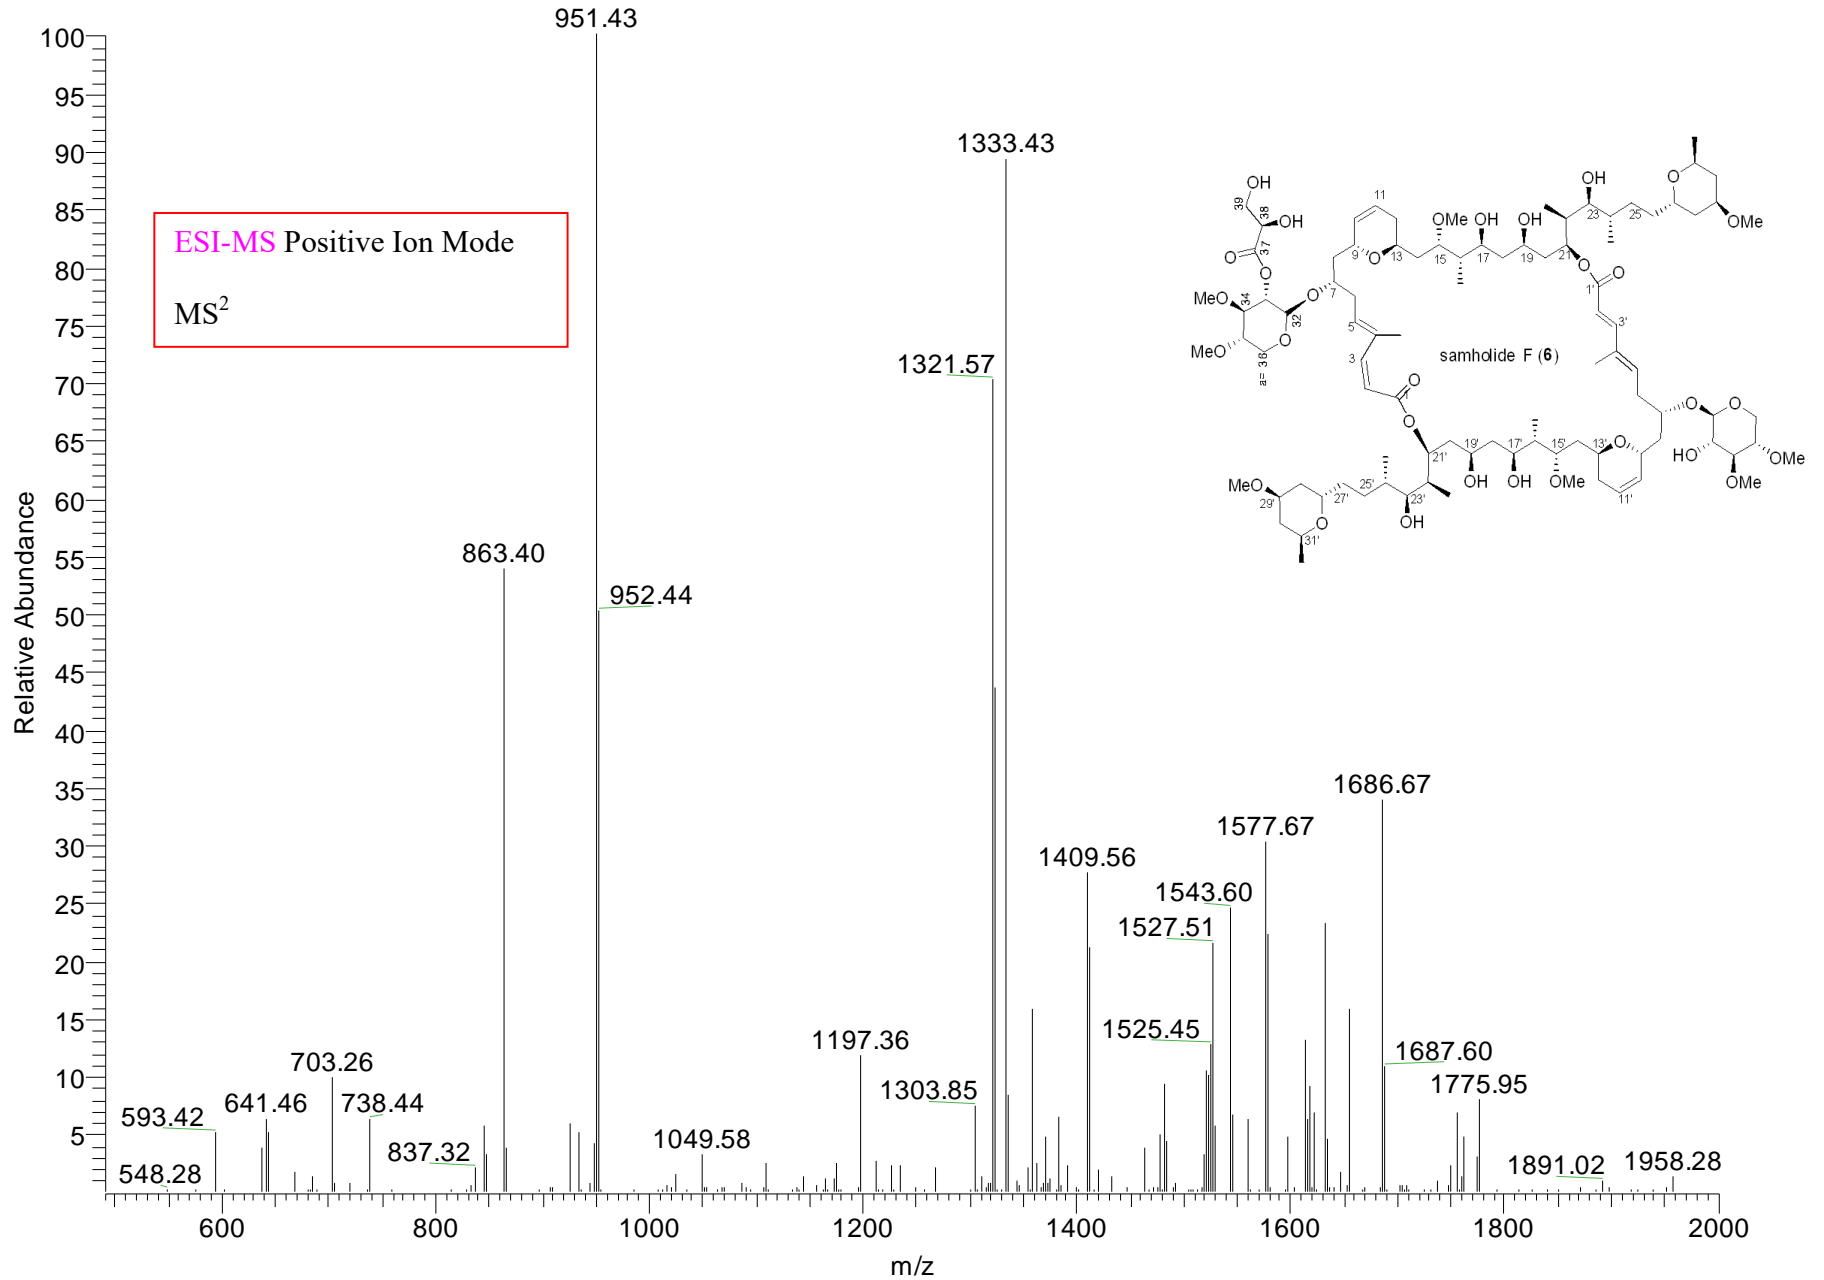

Figure S59 The ESI MS<sup>2</sup> spectrum of samholide F (6)

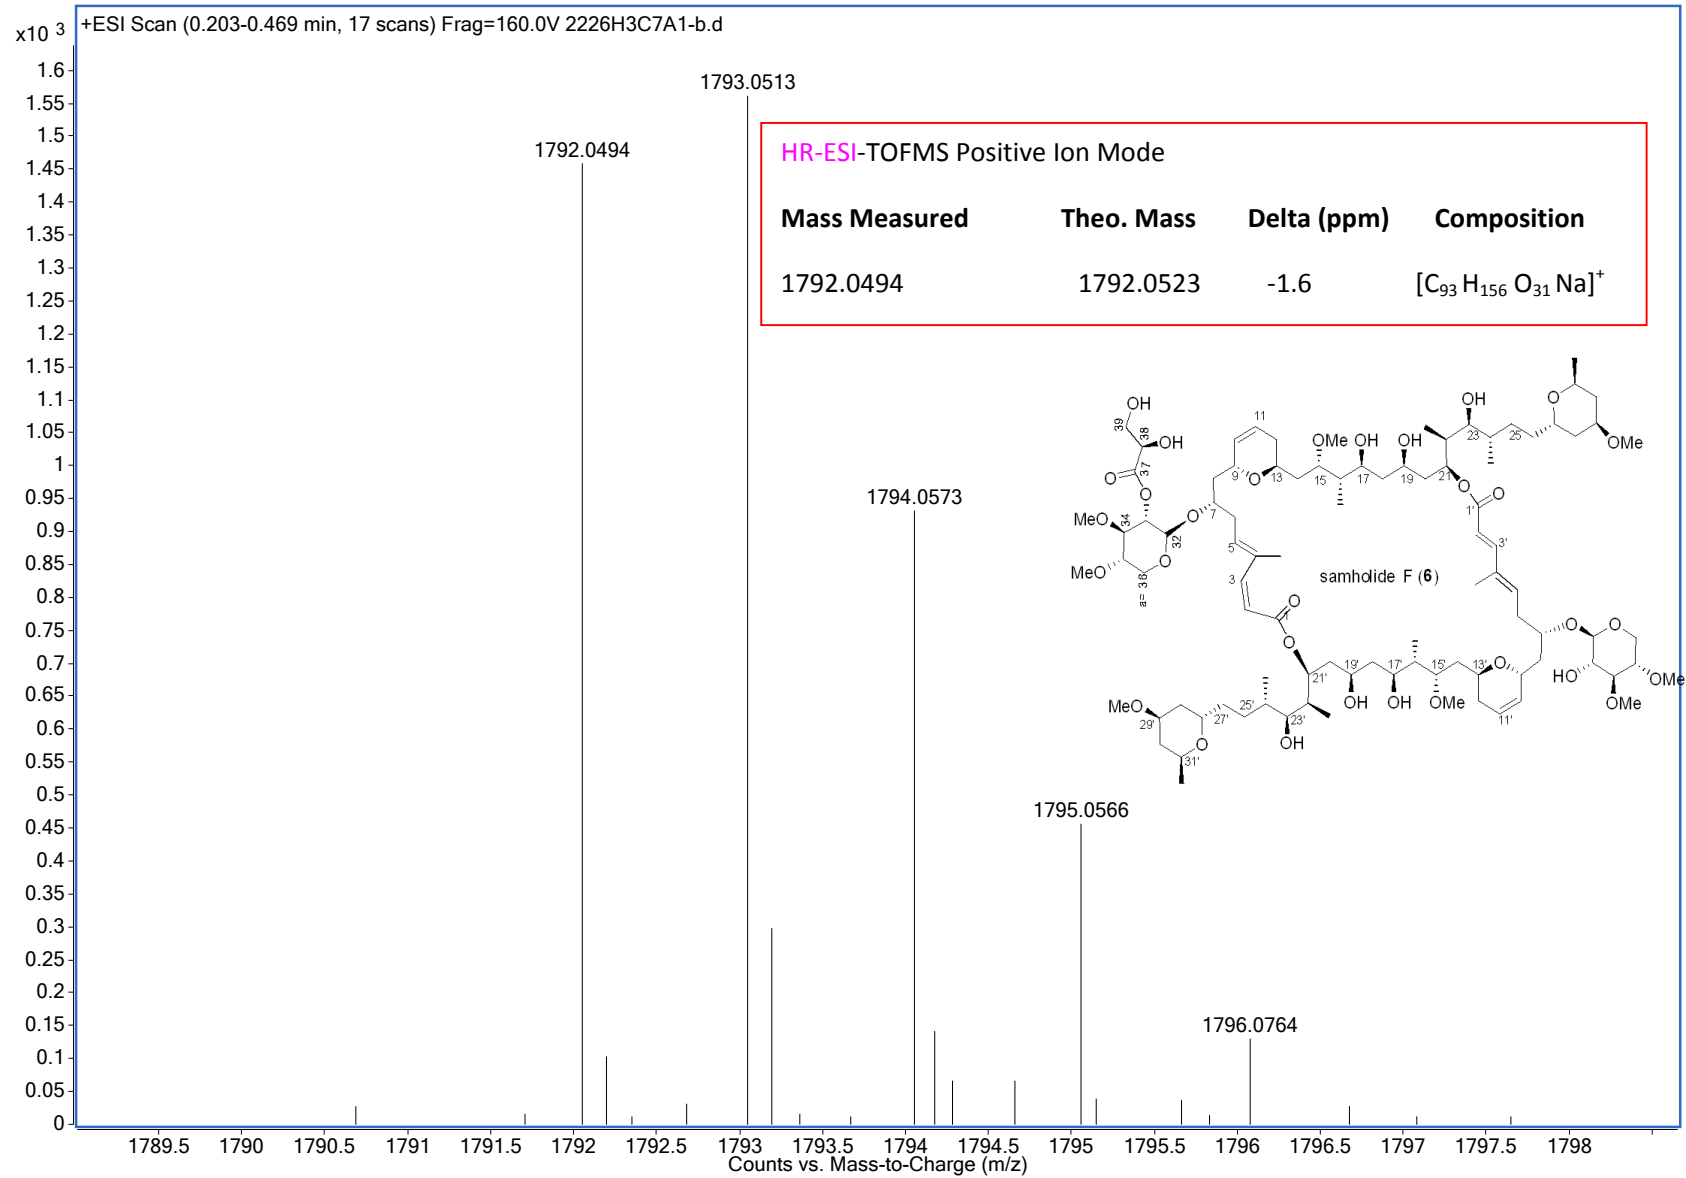

Figure S60 The positive HRESIMS spectrum of samholide F (6)

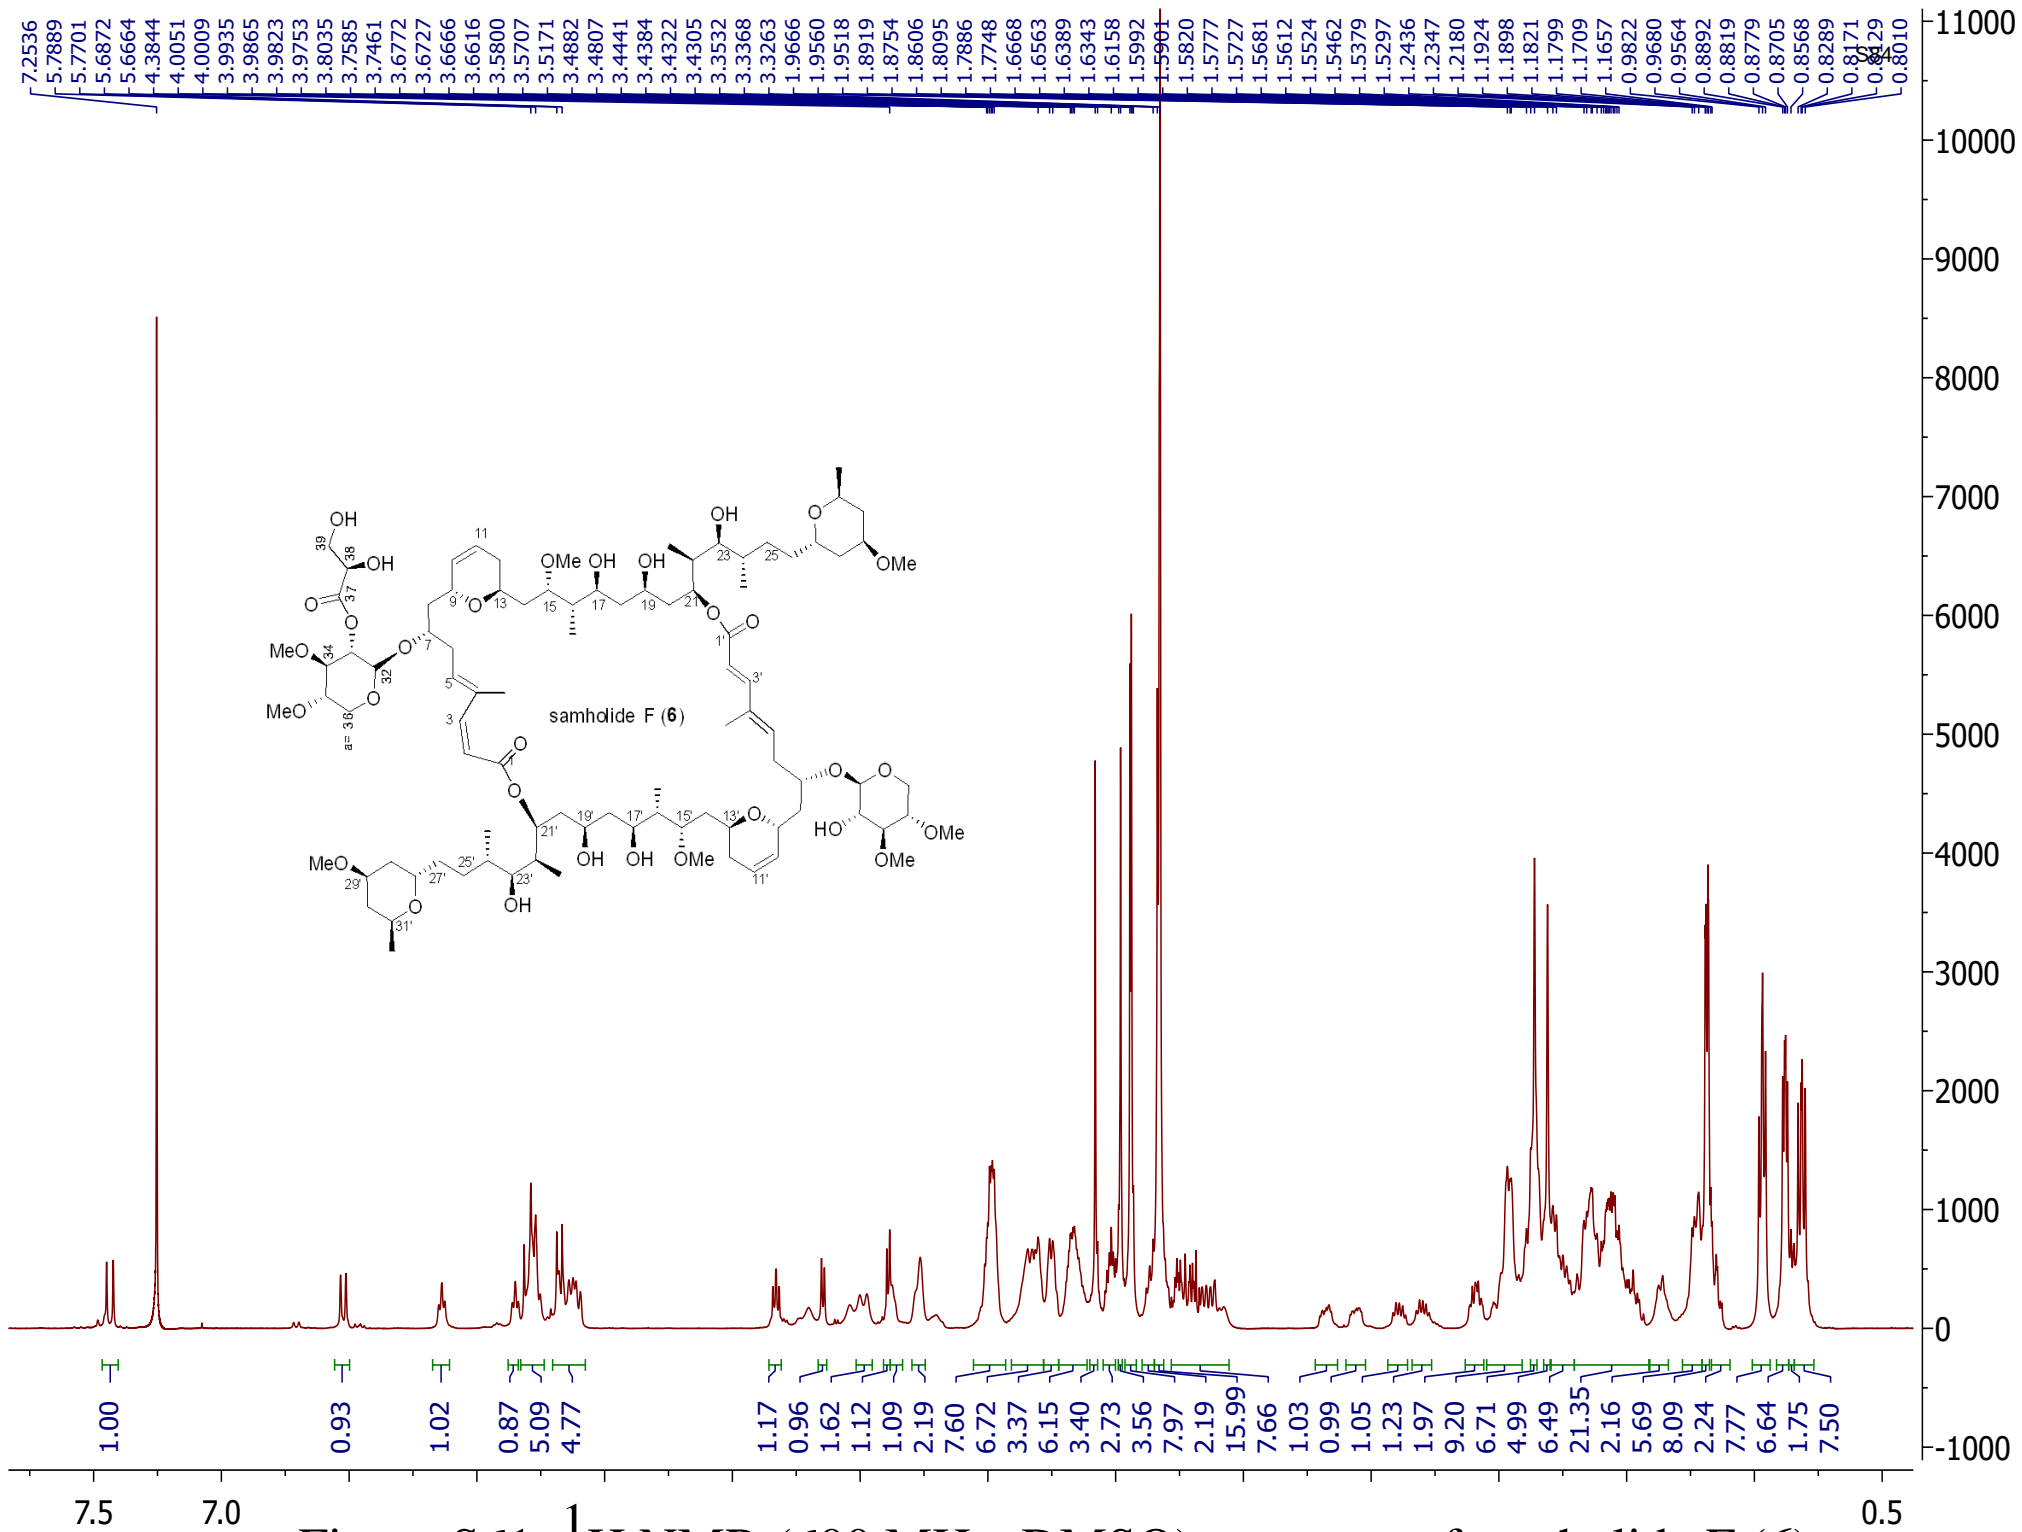

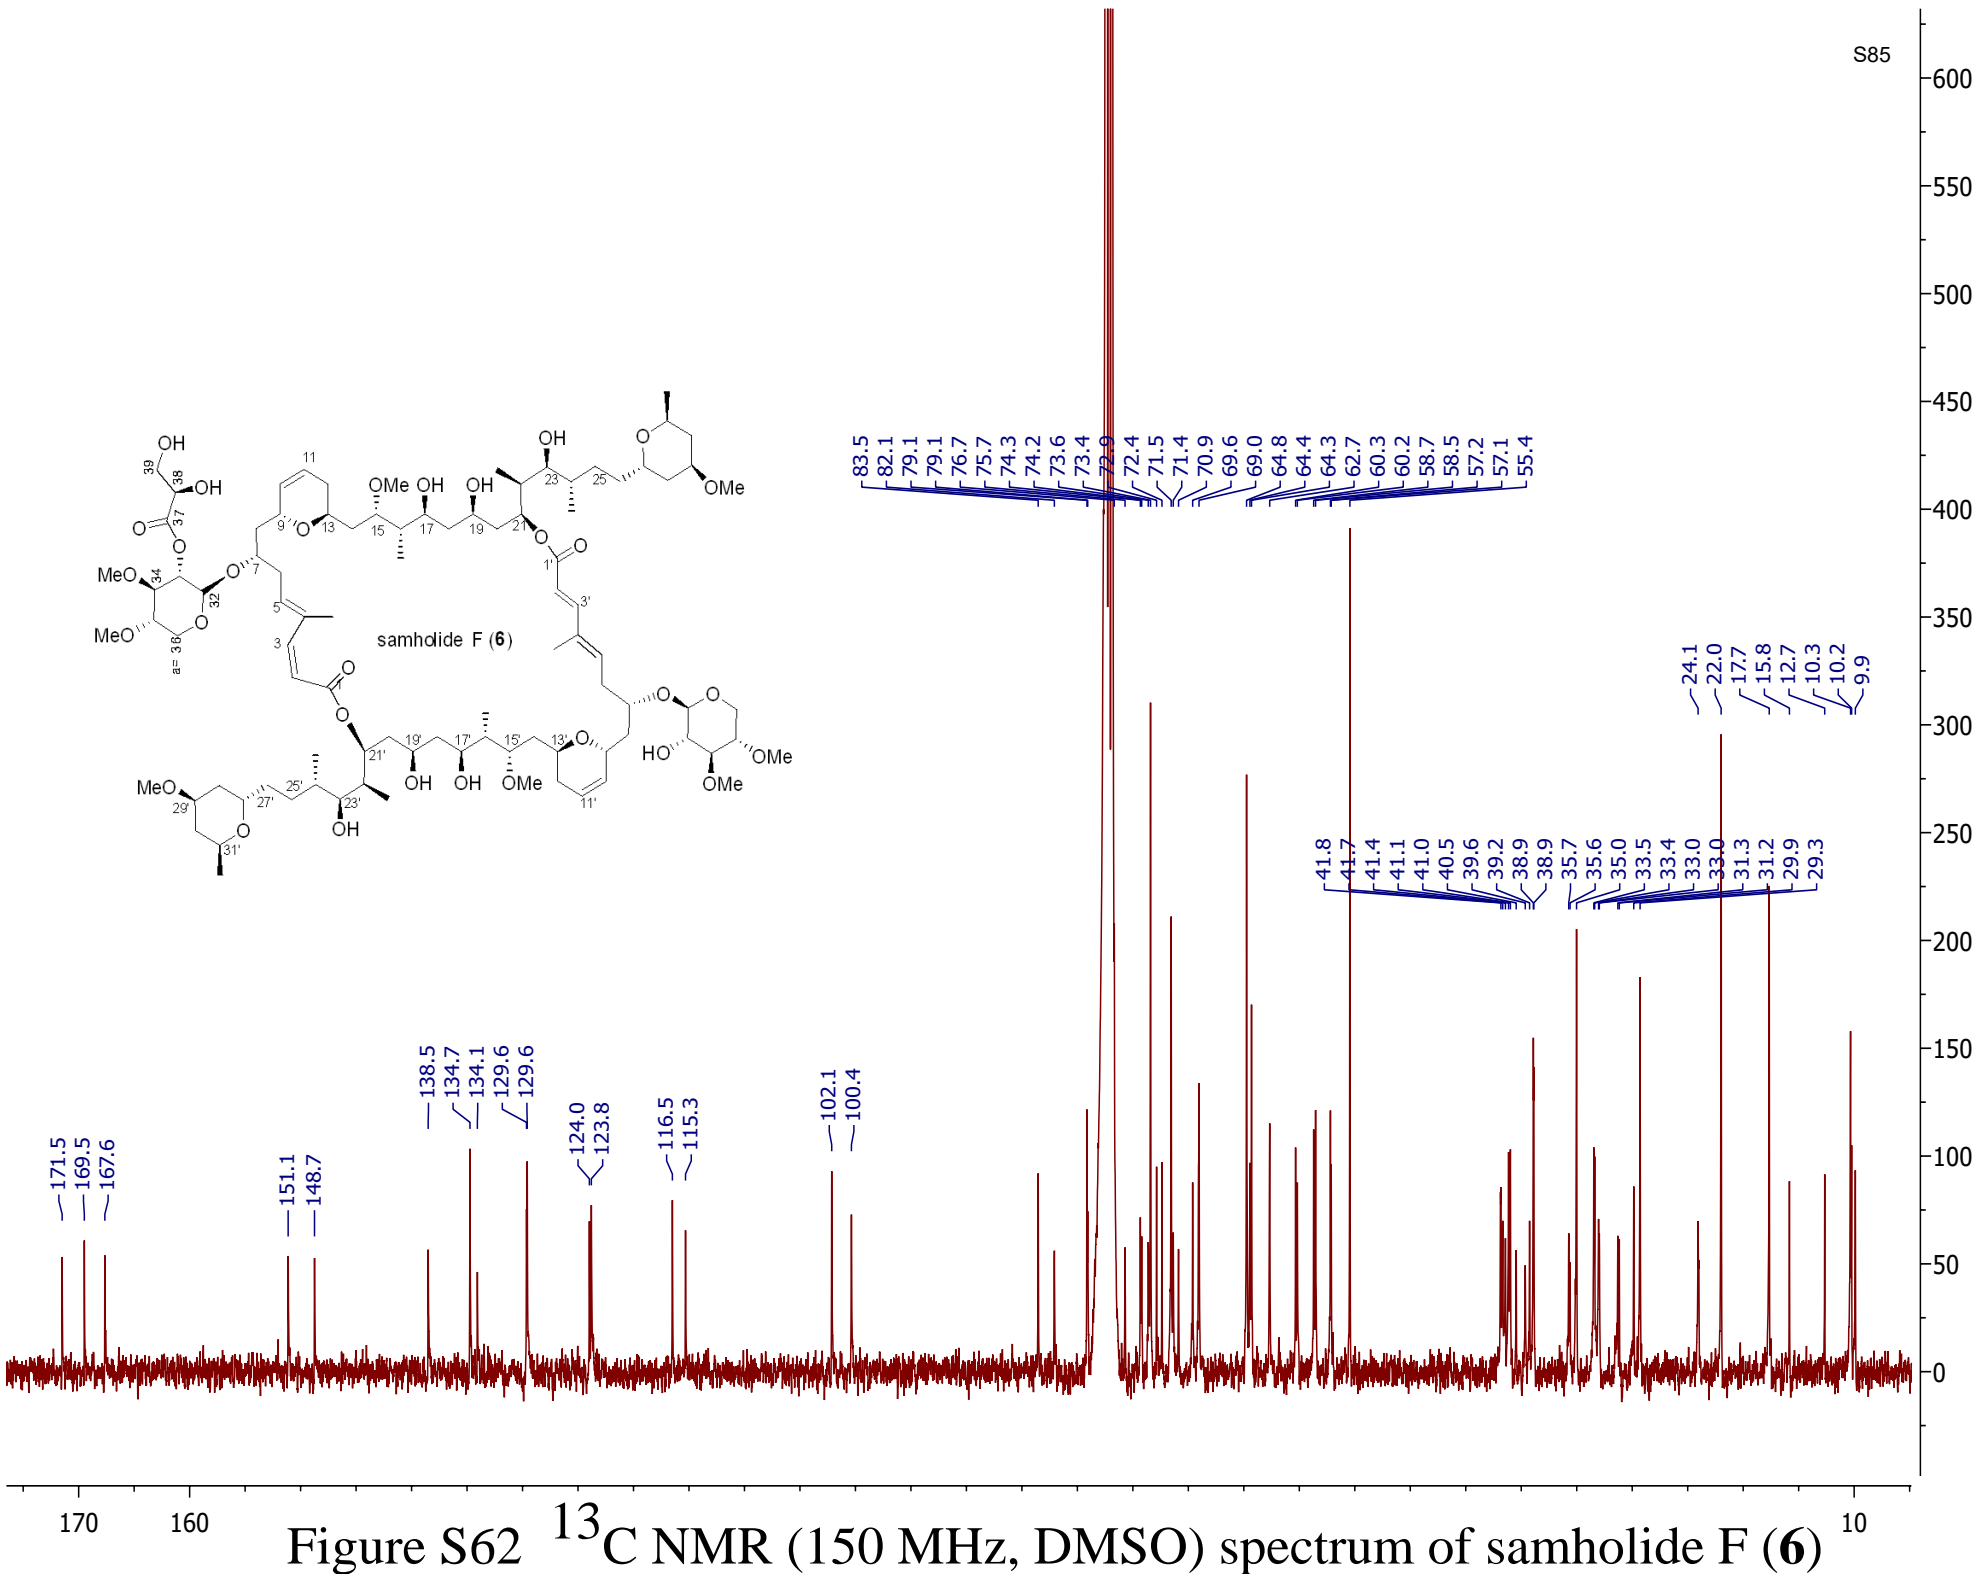

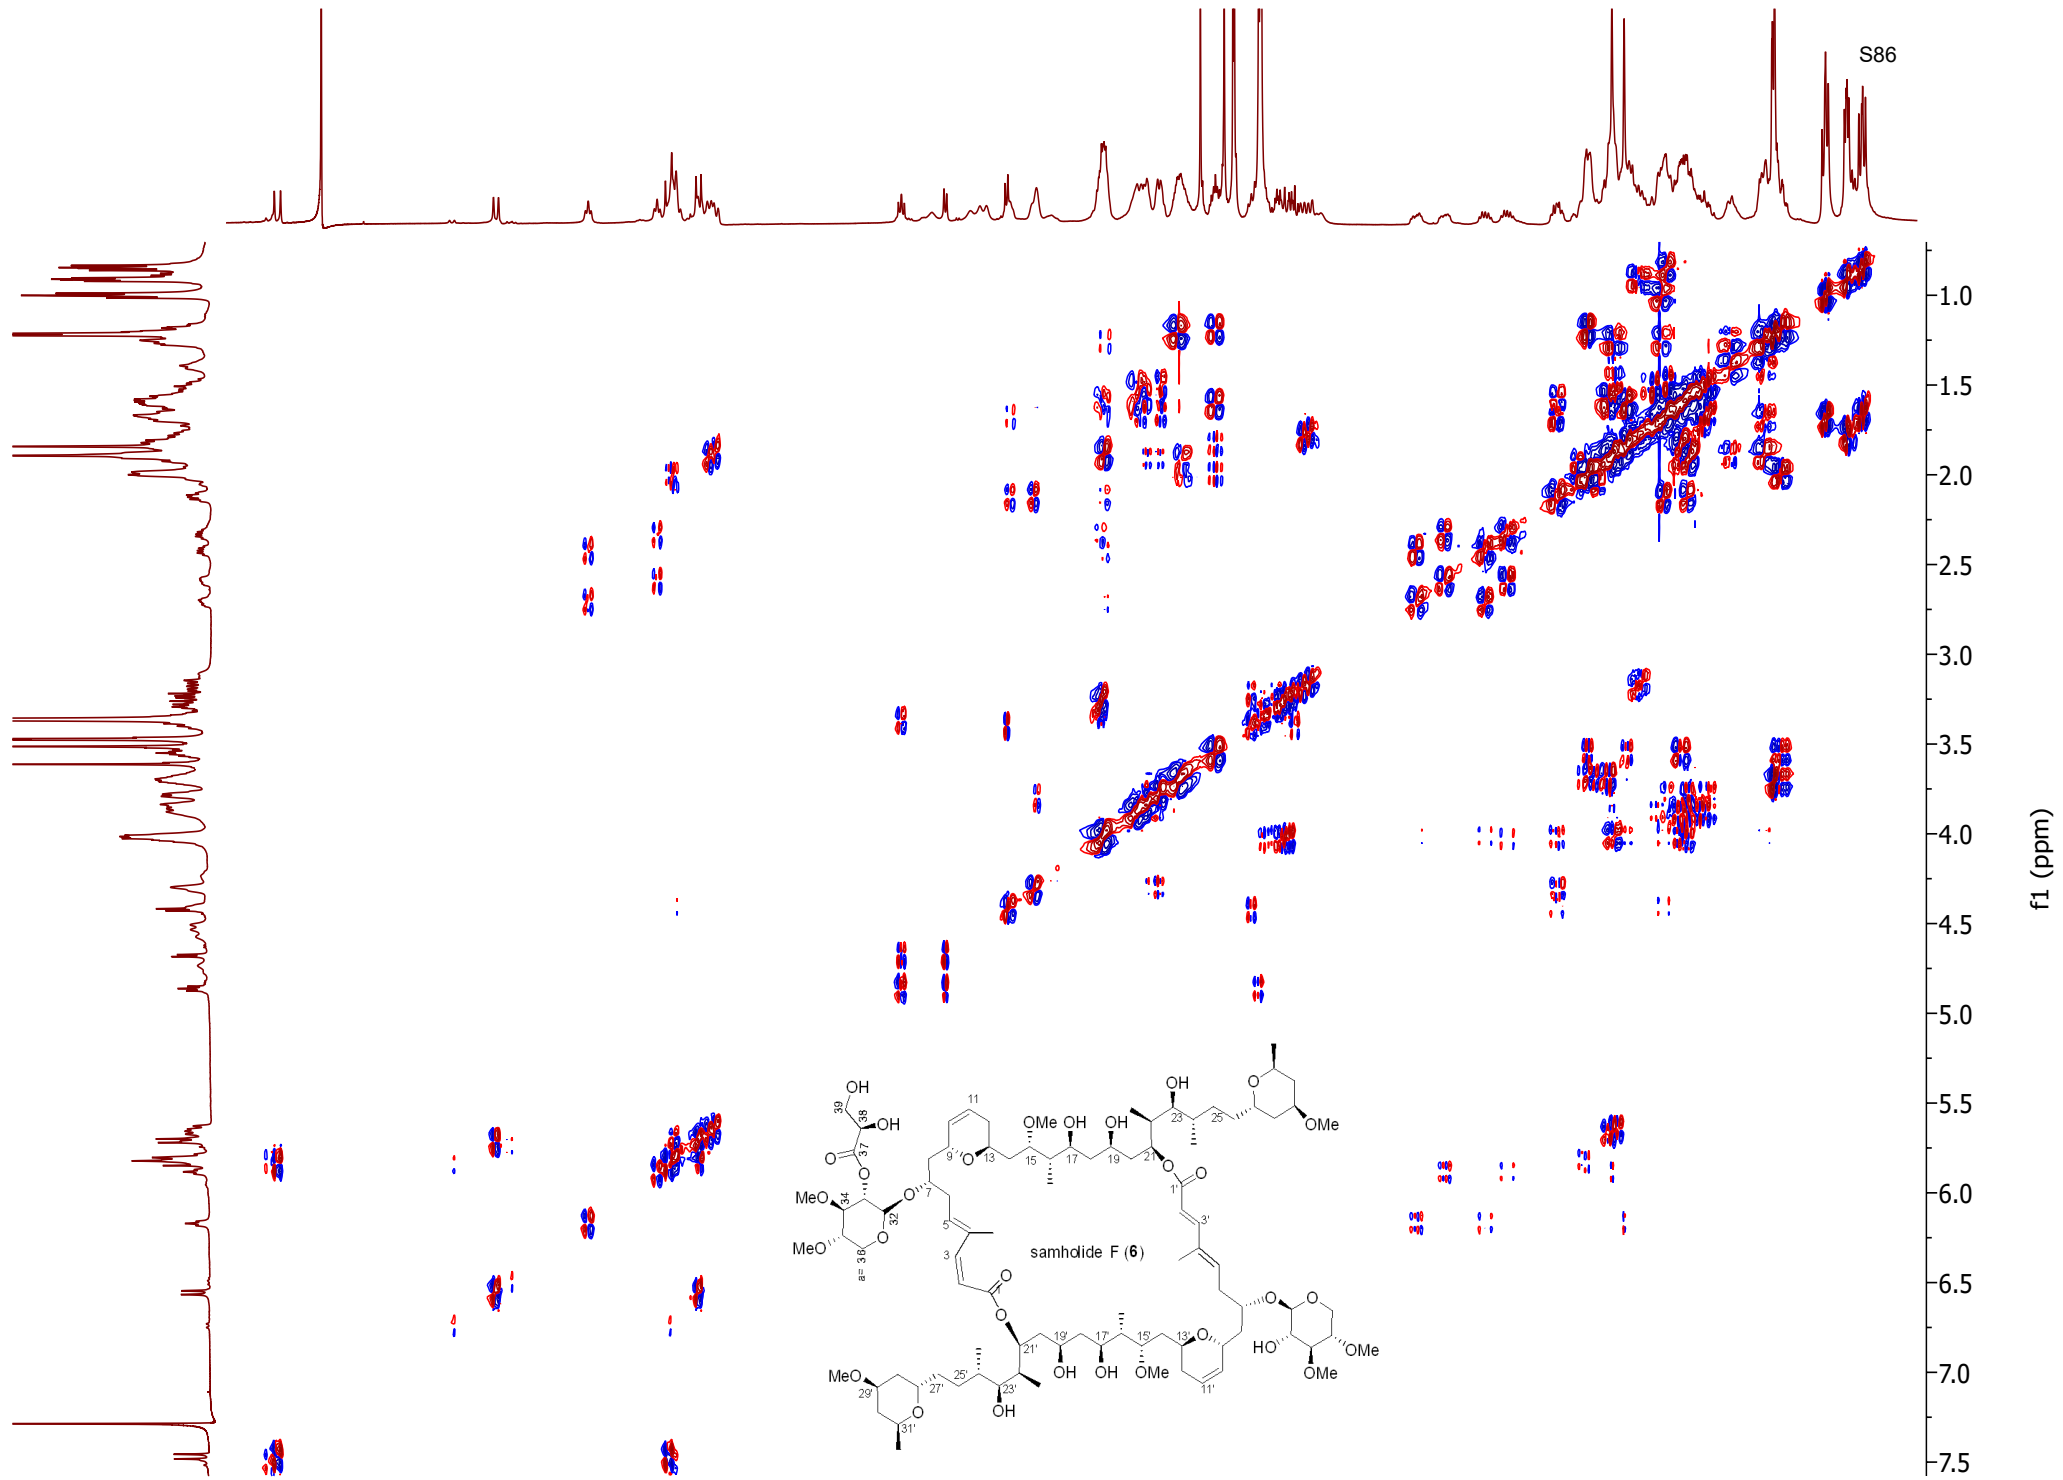

Figure S63  $^1\text{H}$ - $^1\text{H}$  COSY spectrum of samholide F (6)

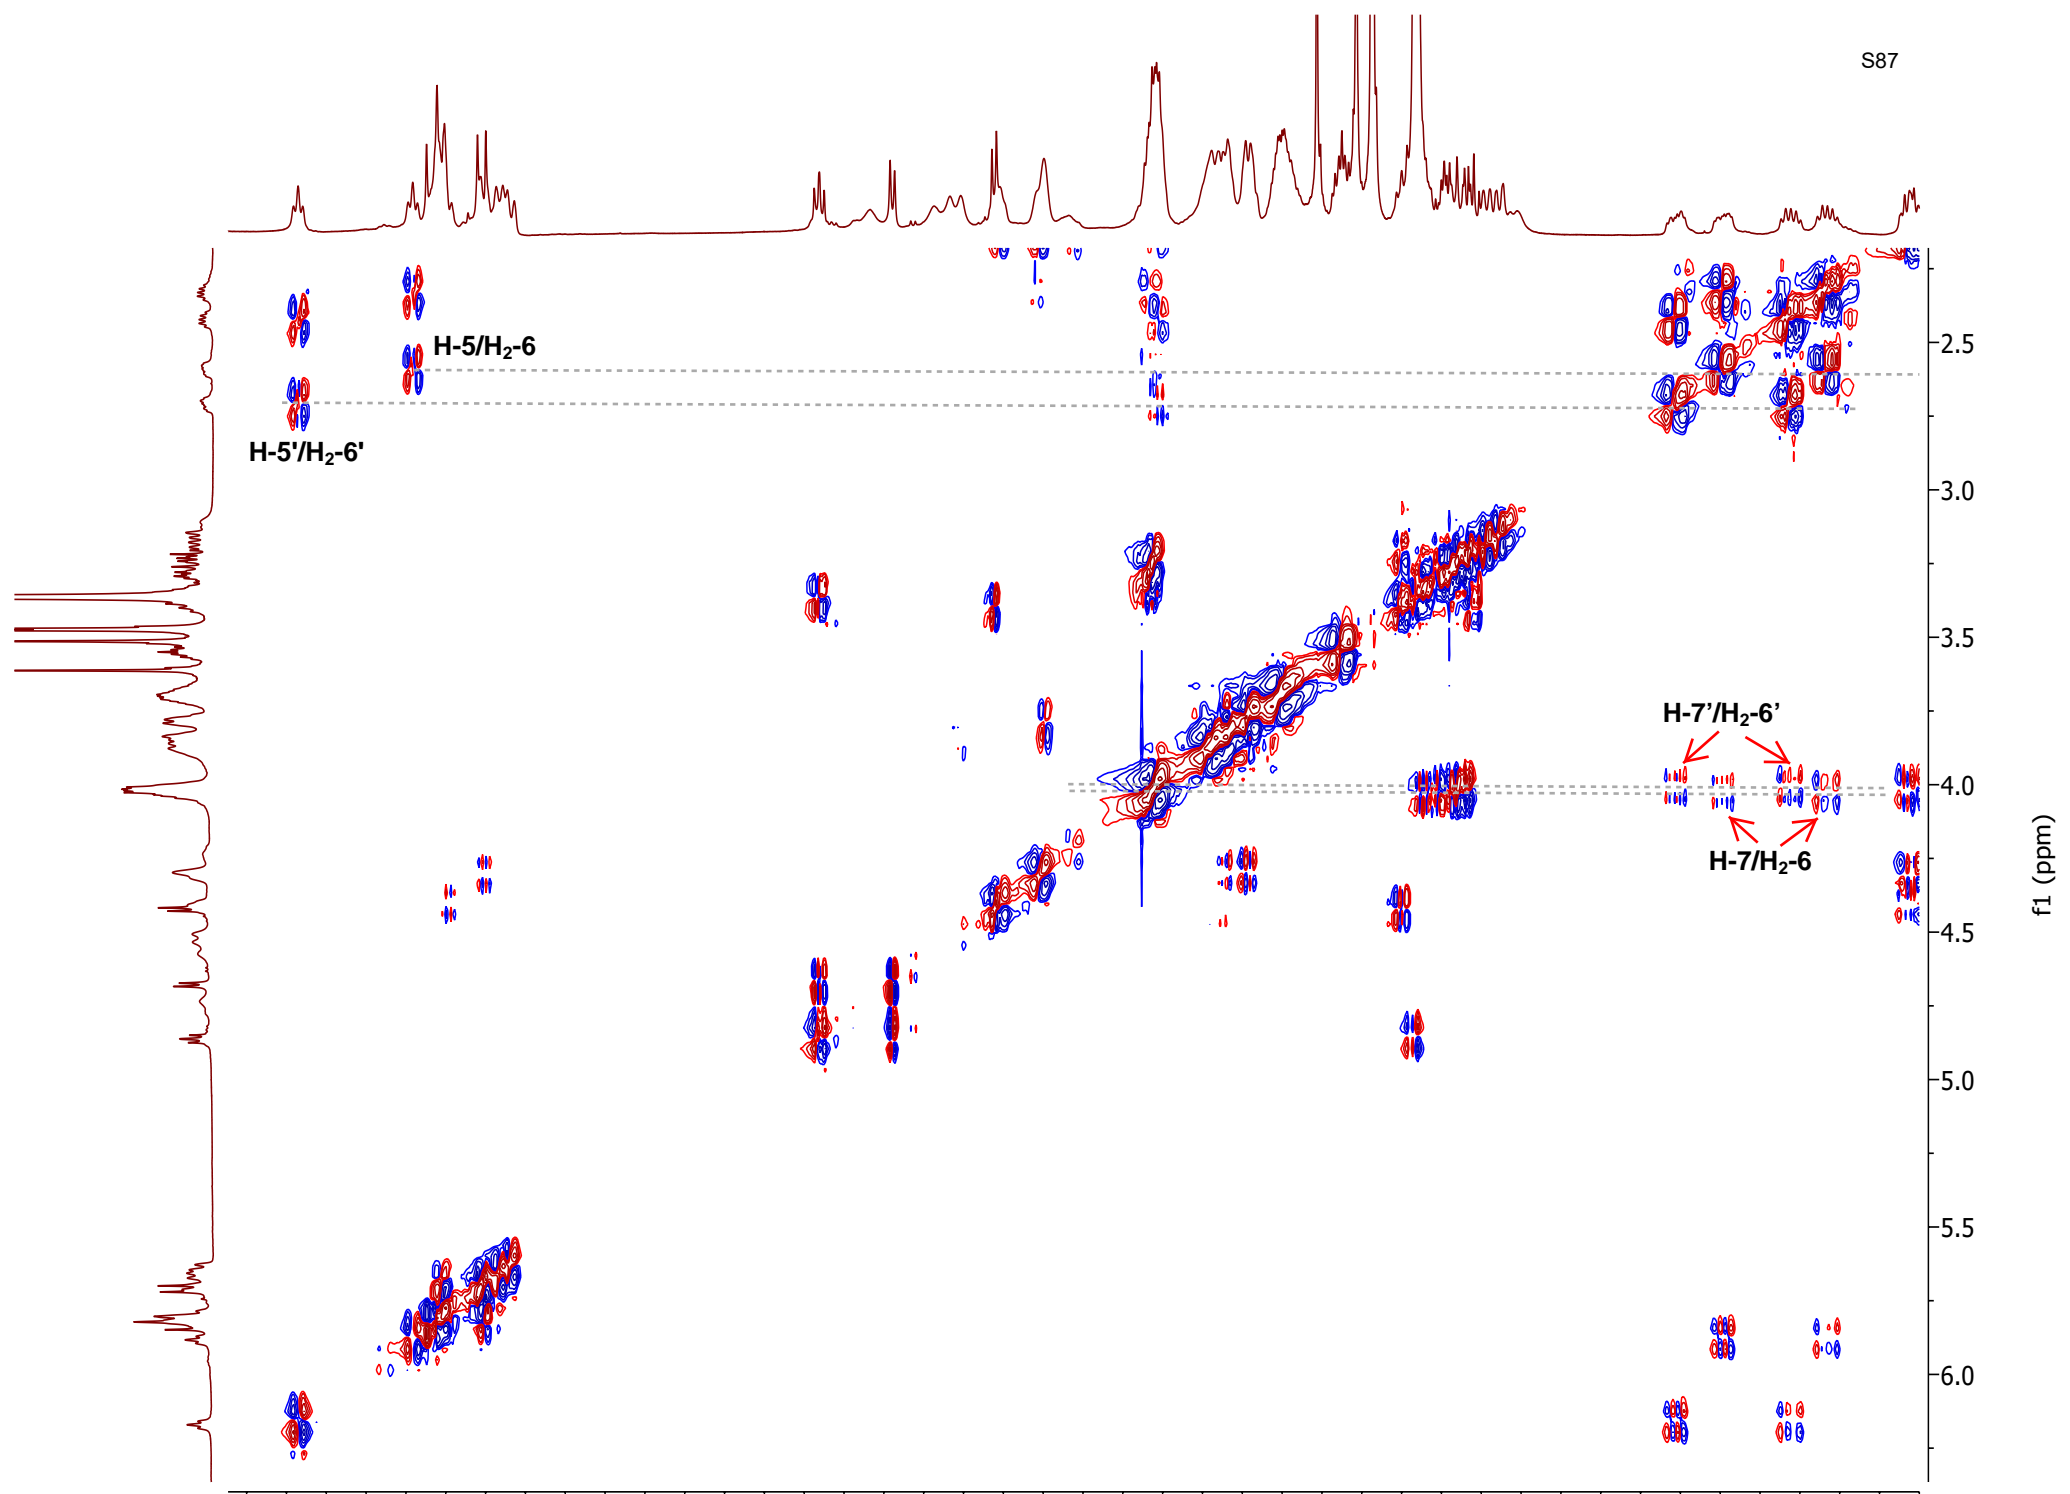

6.2 6.1

Figure S64 Amplified  $^1\text{H}$ - $^1\text{H}$  COSY spectrum of samholide F (**6**)

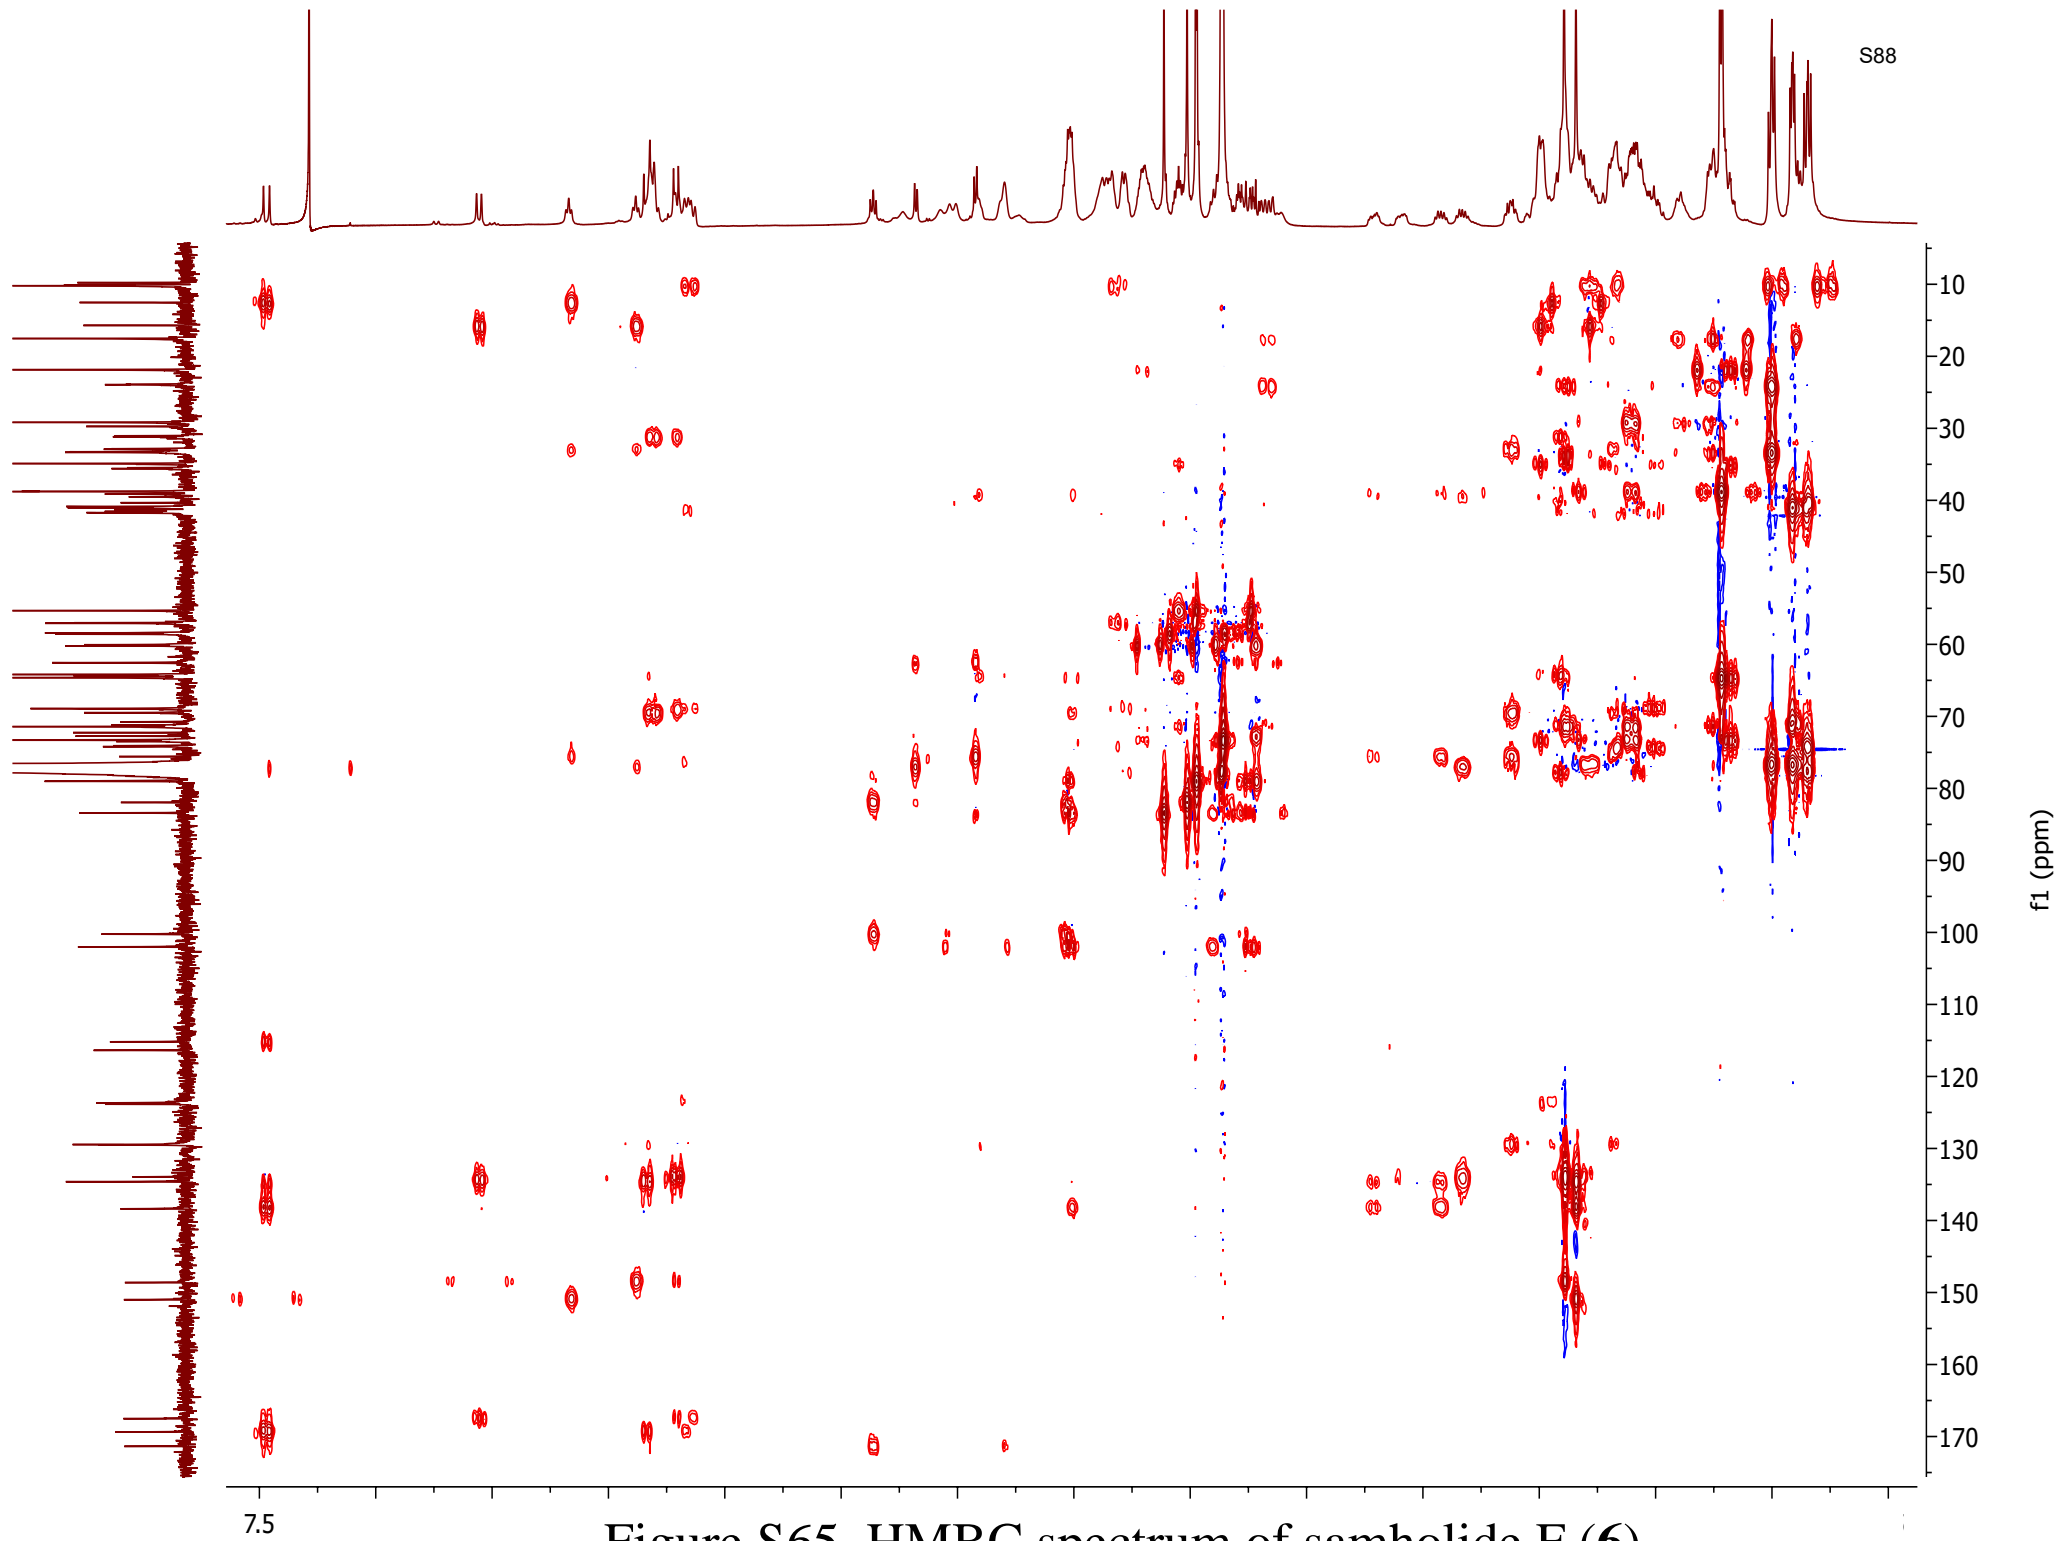

Figure S65 HMBC spectrum of samholide F (6)



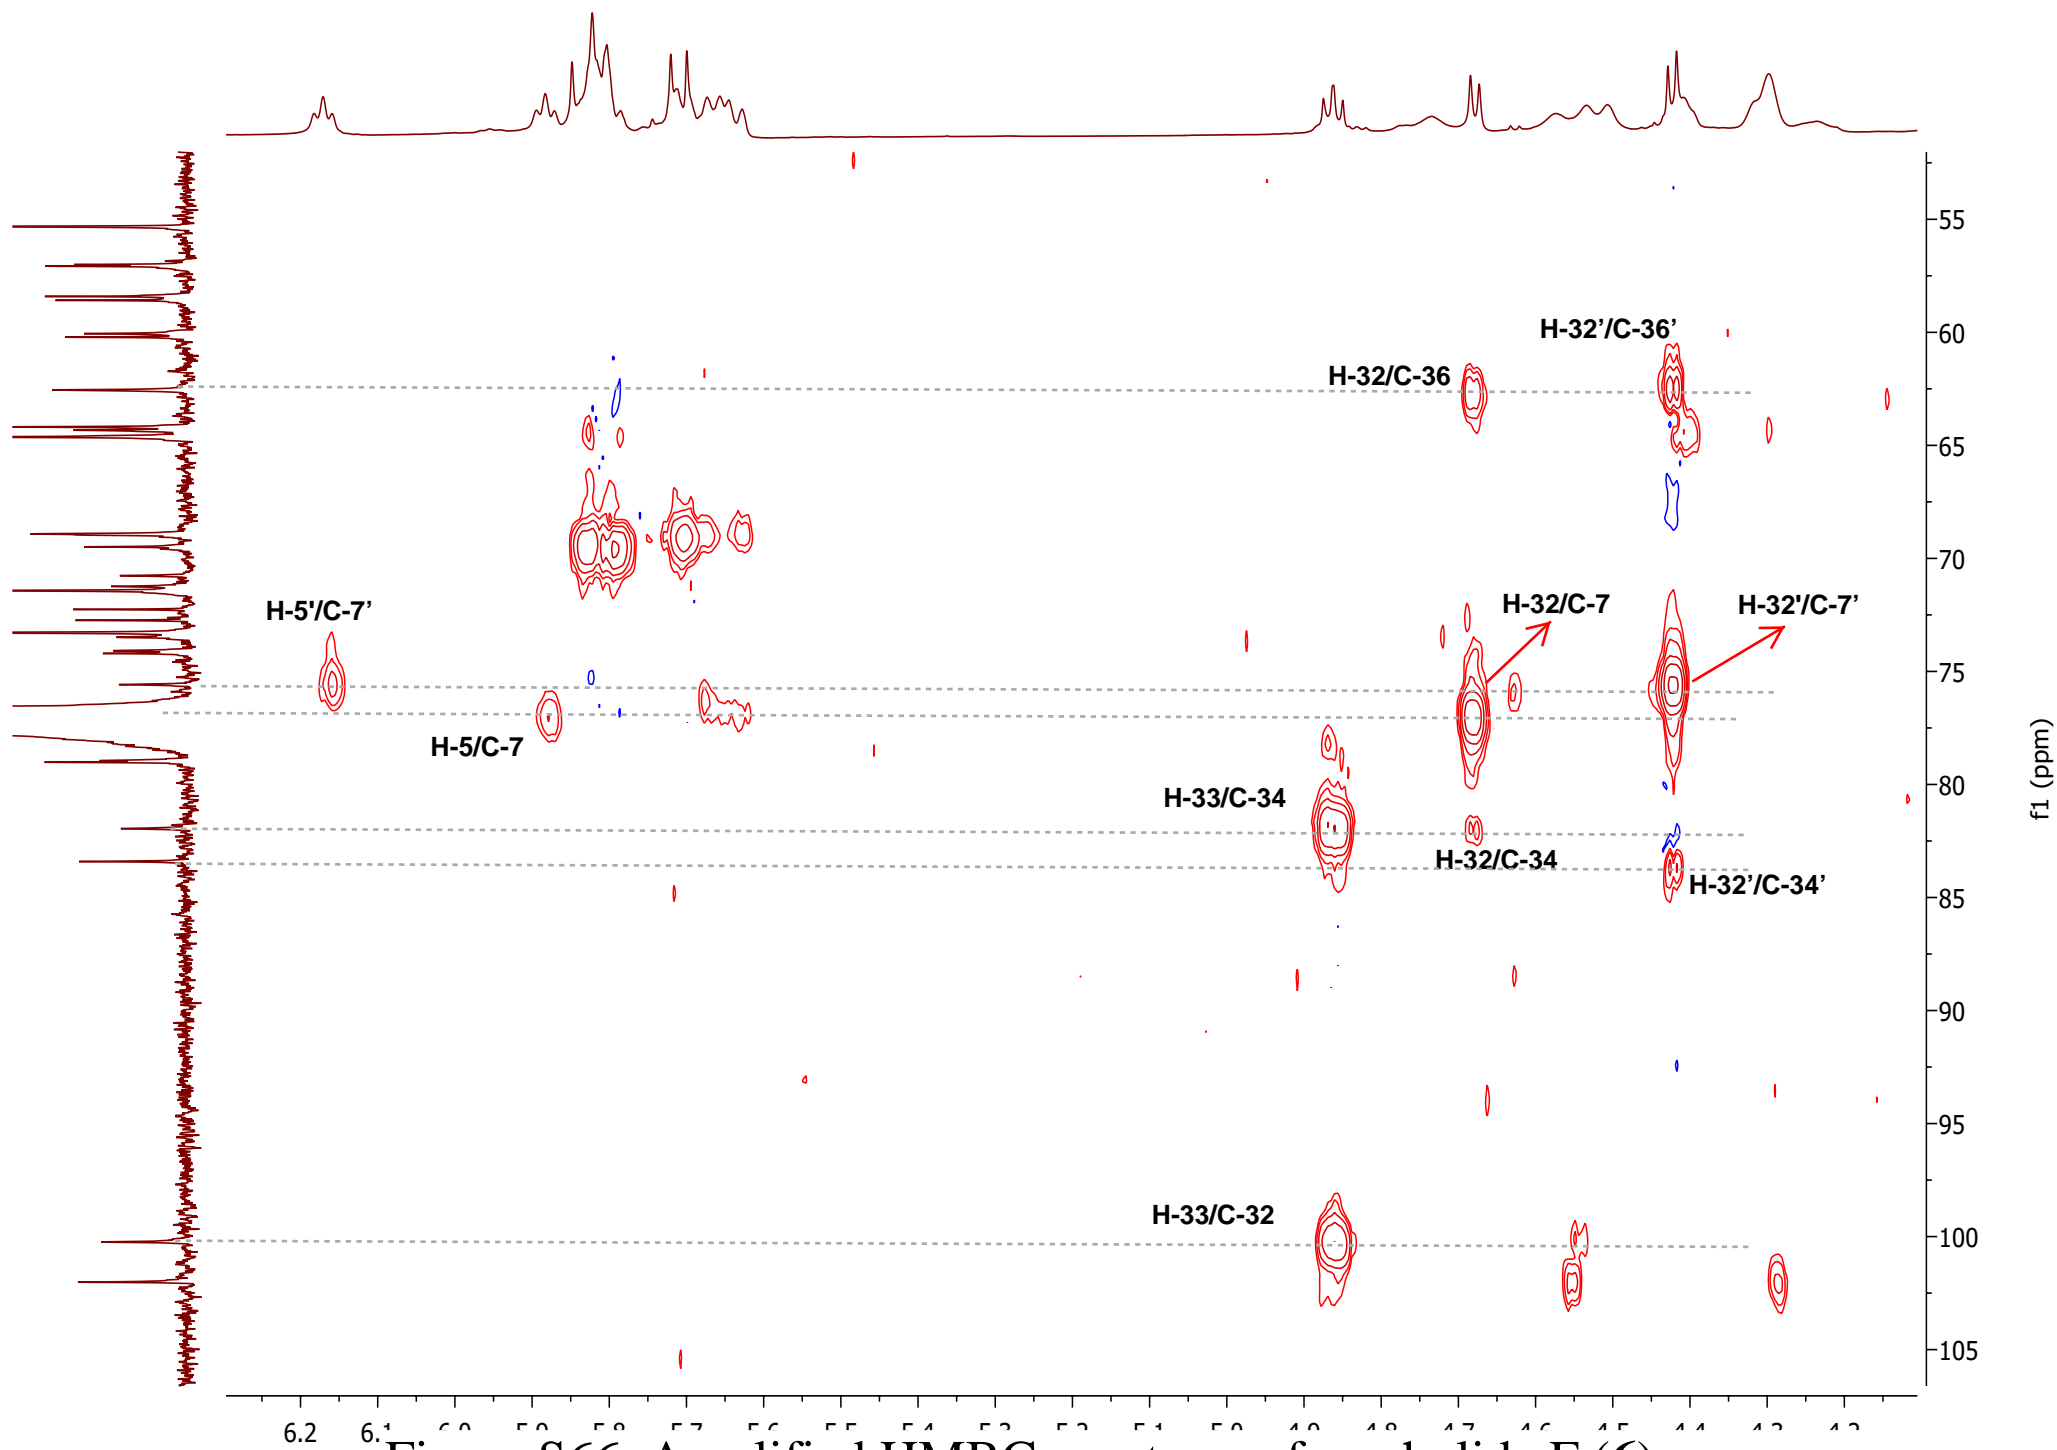Figure S66 Amplified HMBC spectrum of samholide F (**6**)

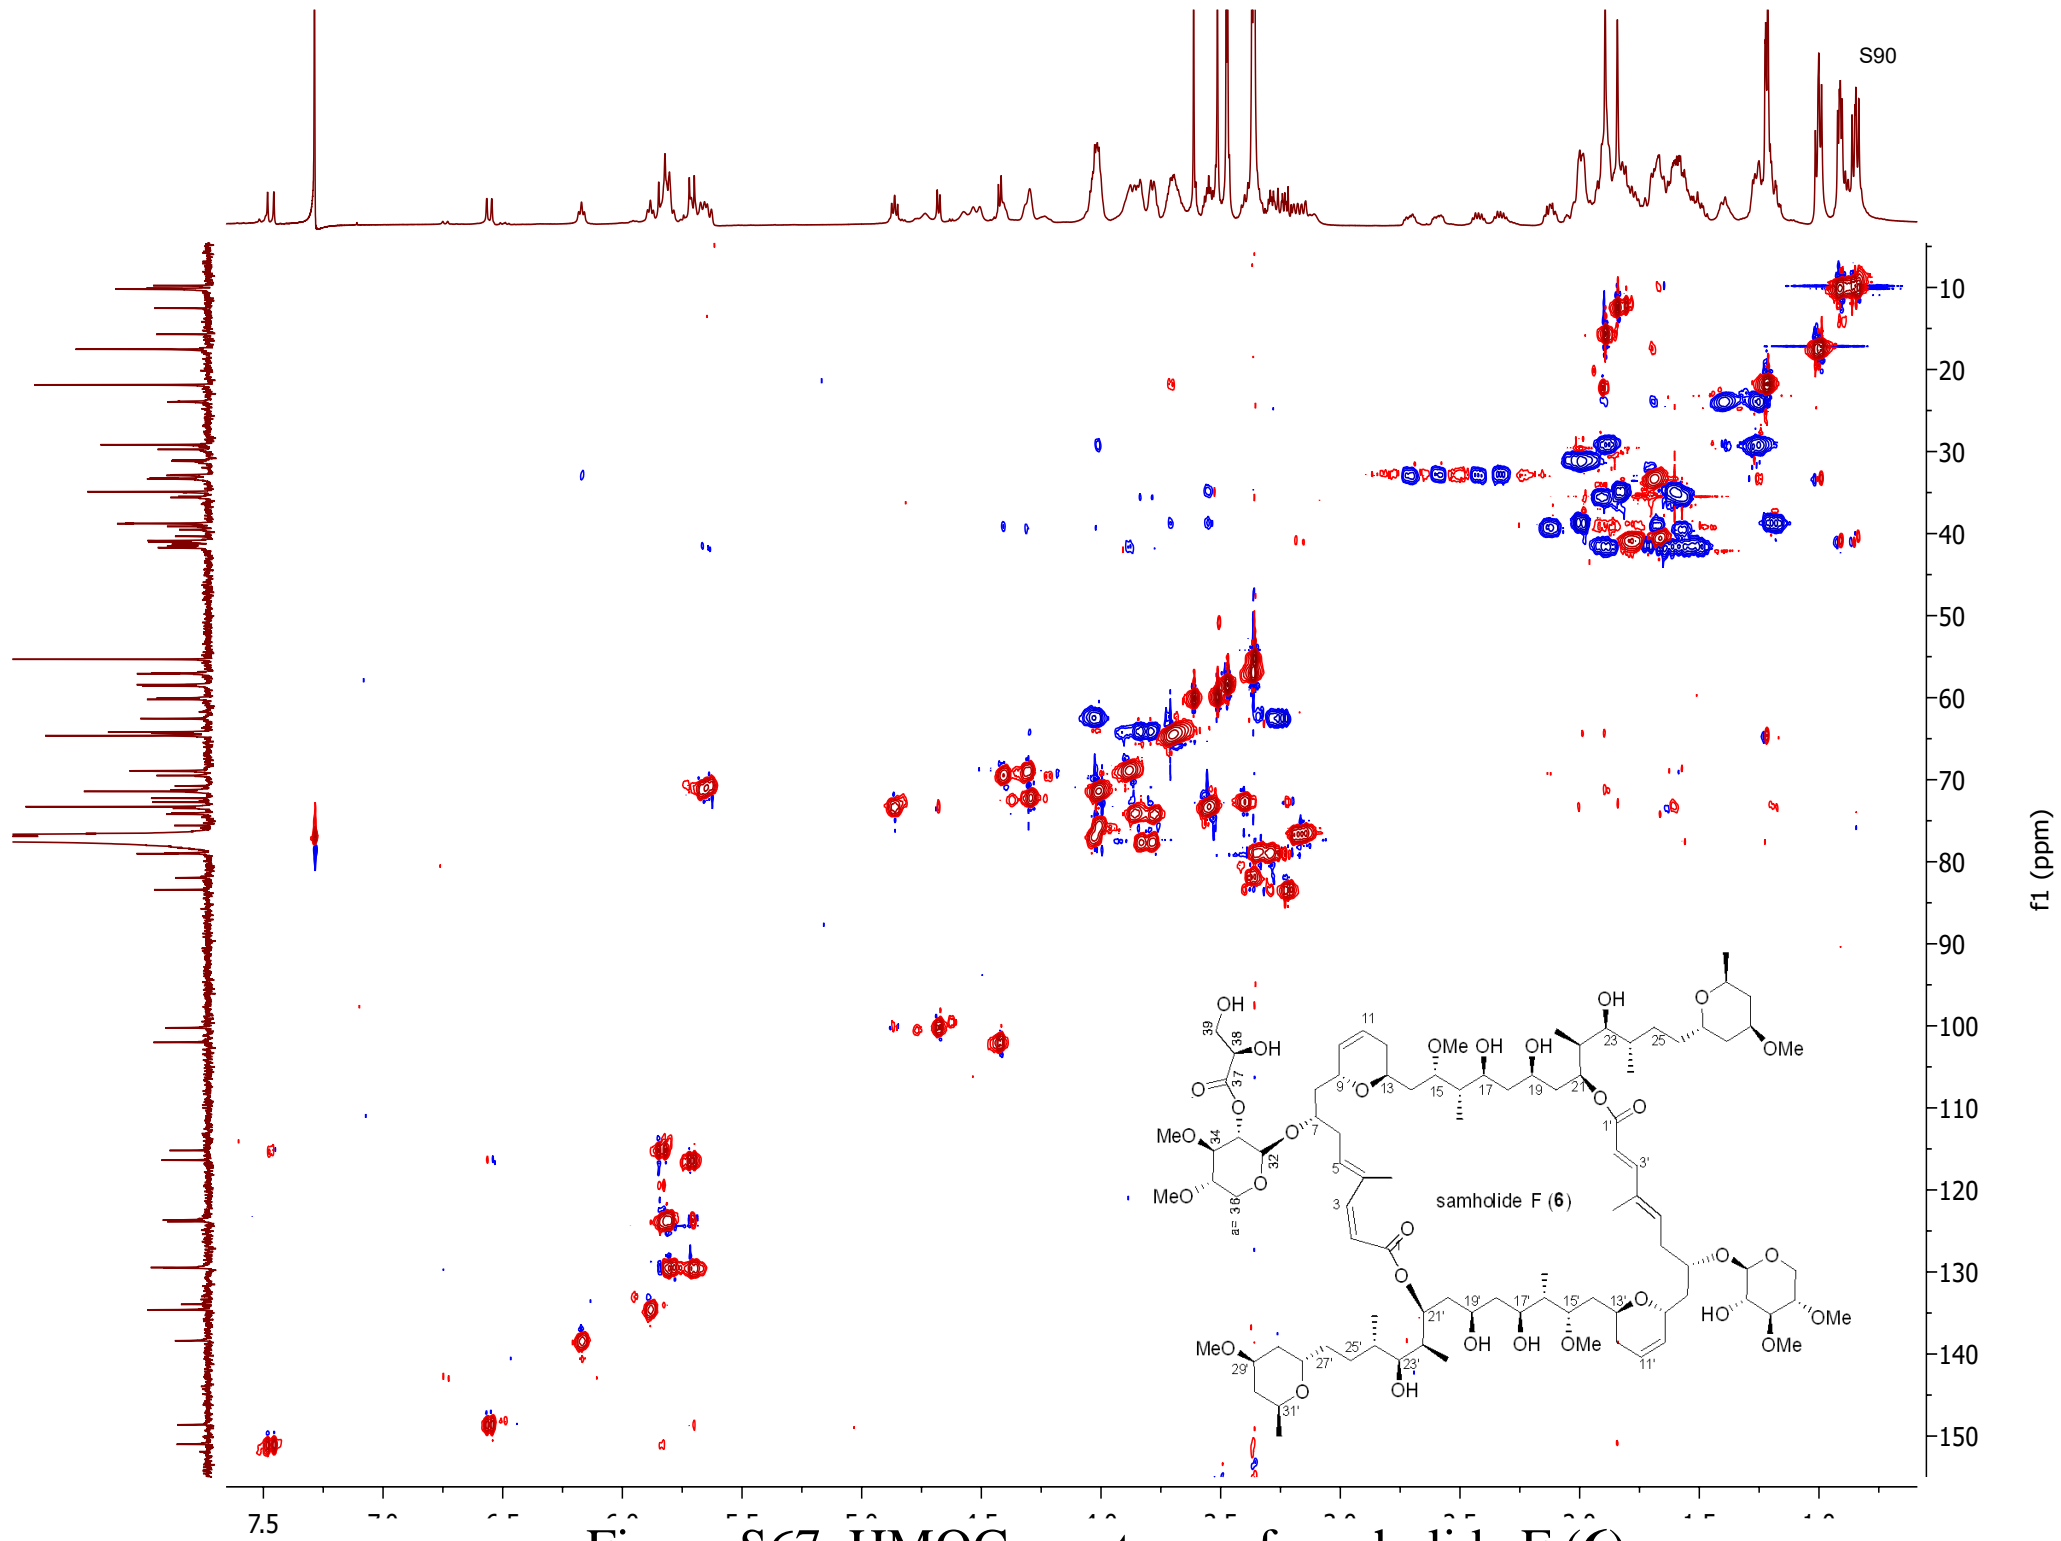

Figure S67 HMQC spectrum of samholide F (6)

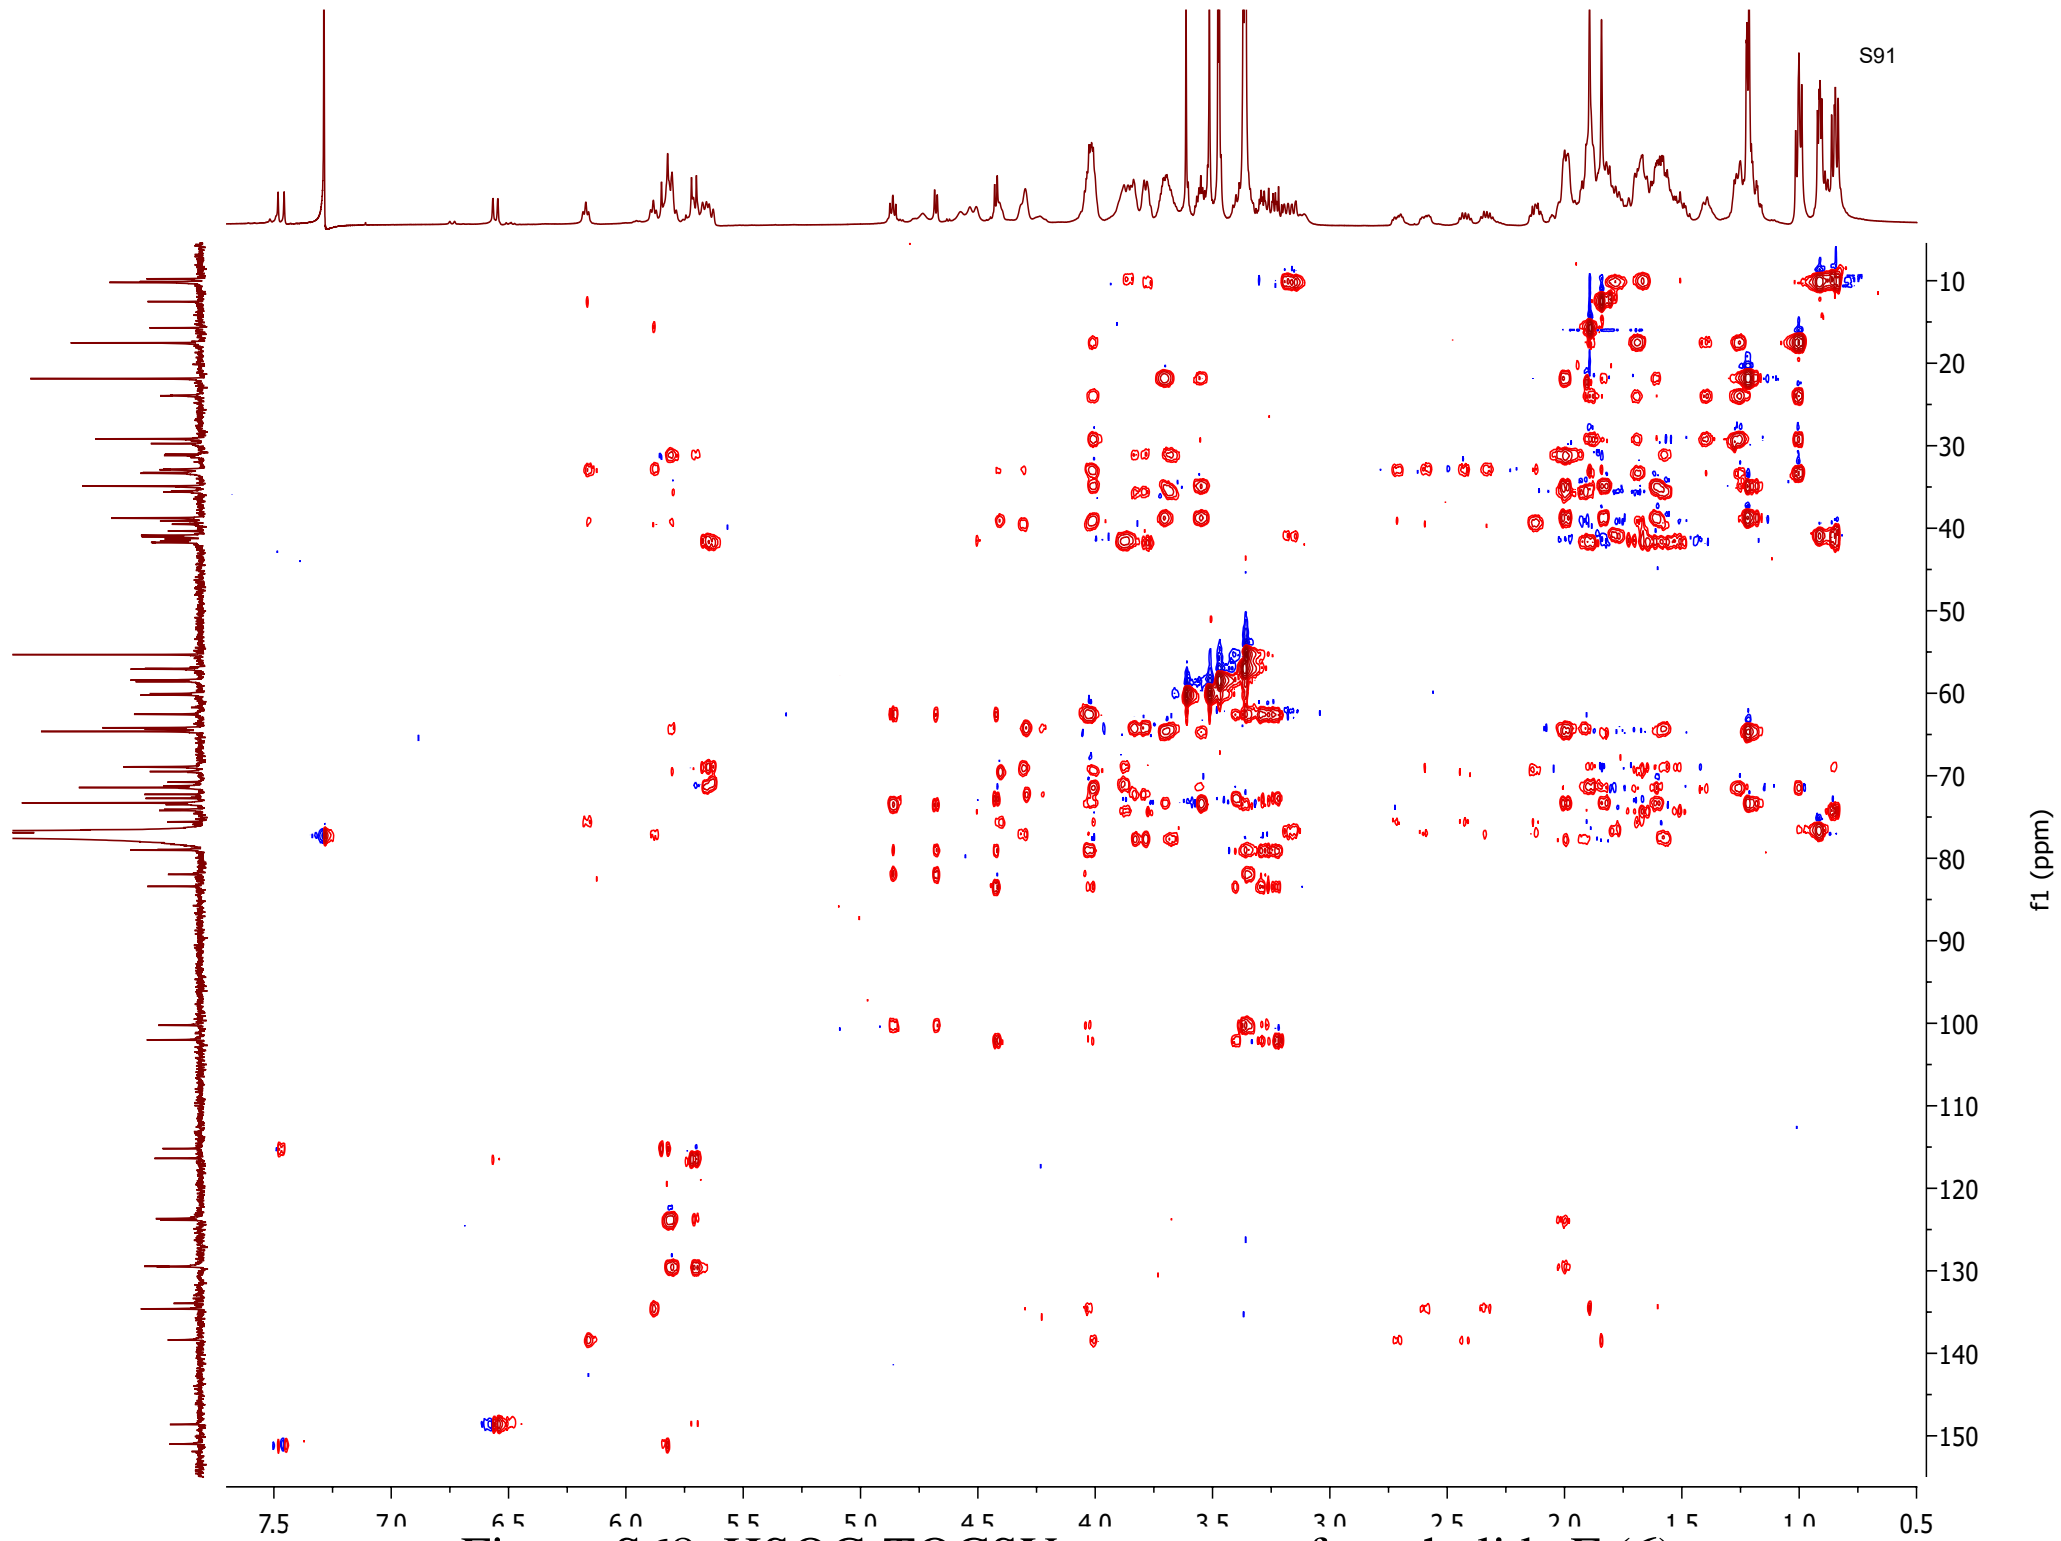

Figure S68 HSQC-TOCSY spectrum of samholide F (6)

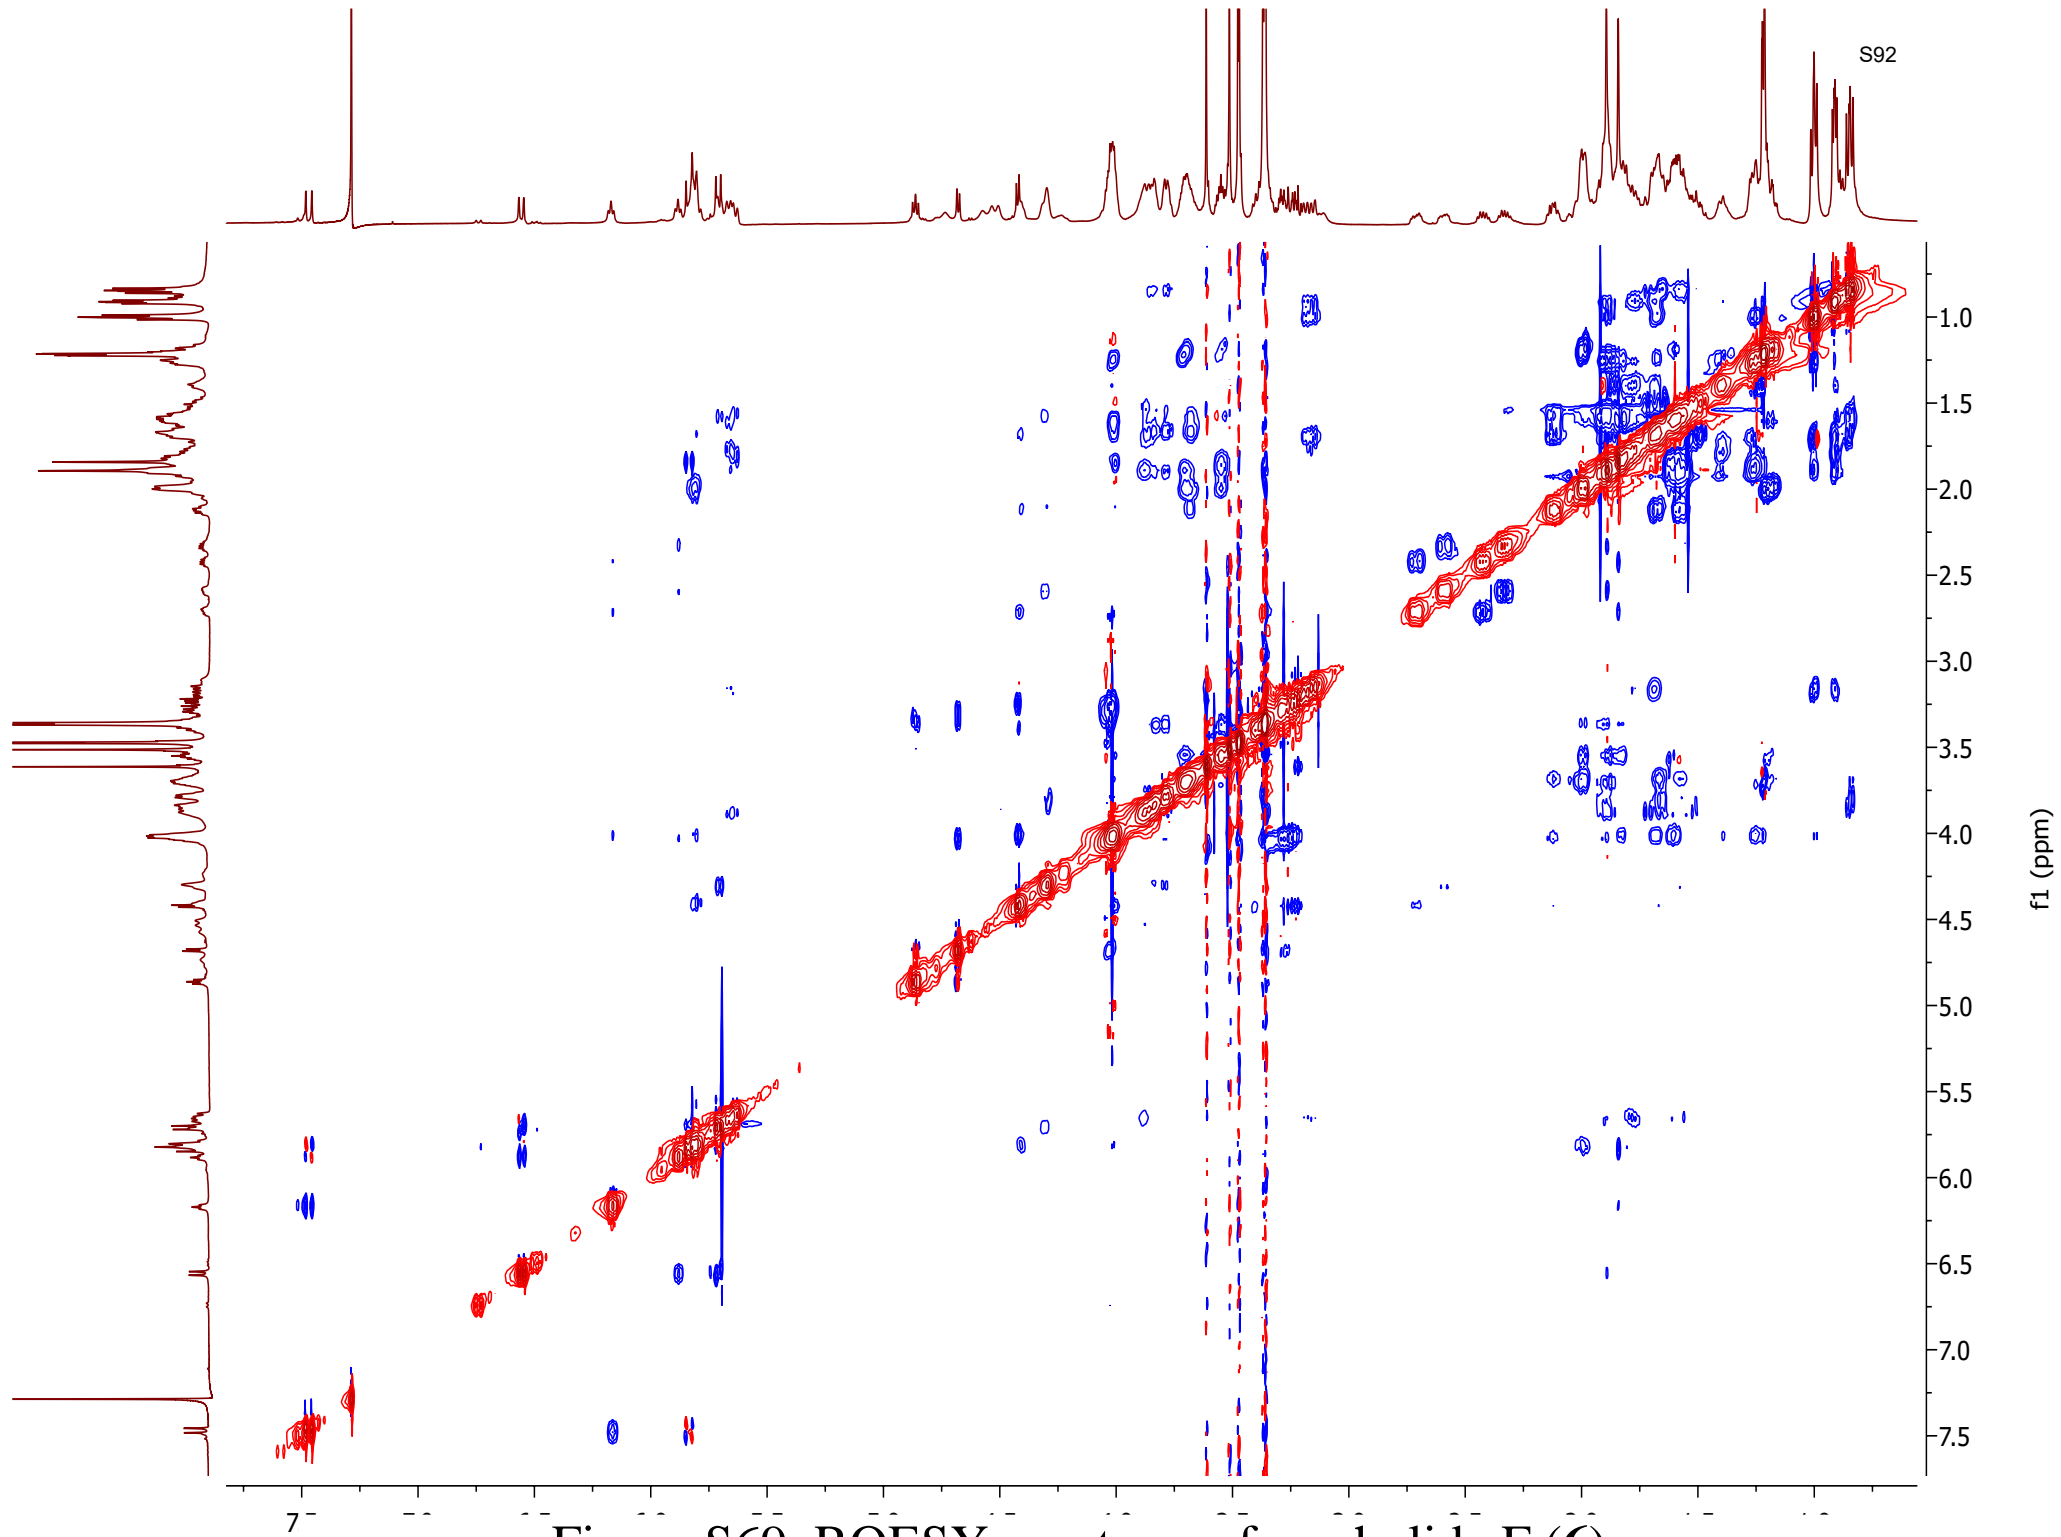

Figure S69 ROESY spectrum of samholide F (6)

2226H3C7A1.5.ser  
UCSD\_ROESY

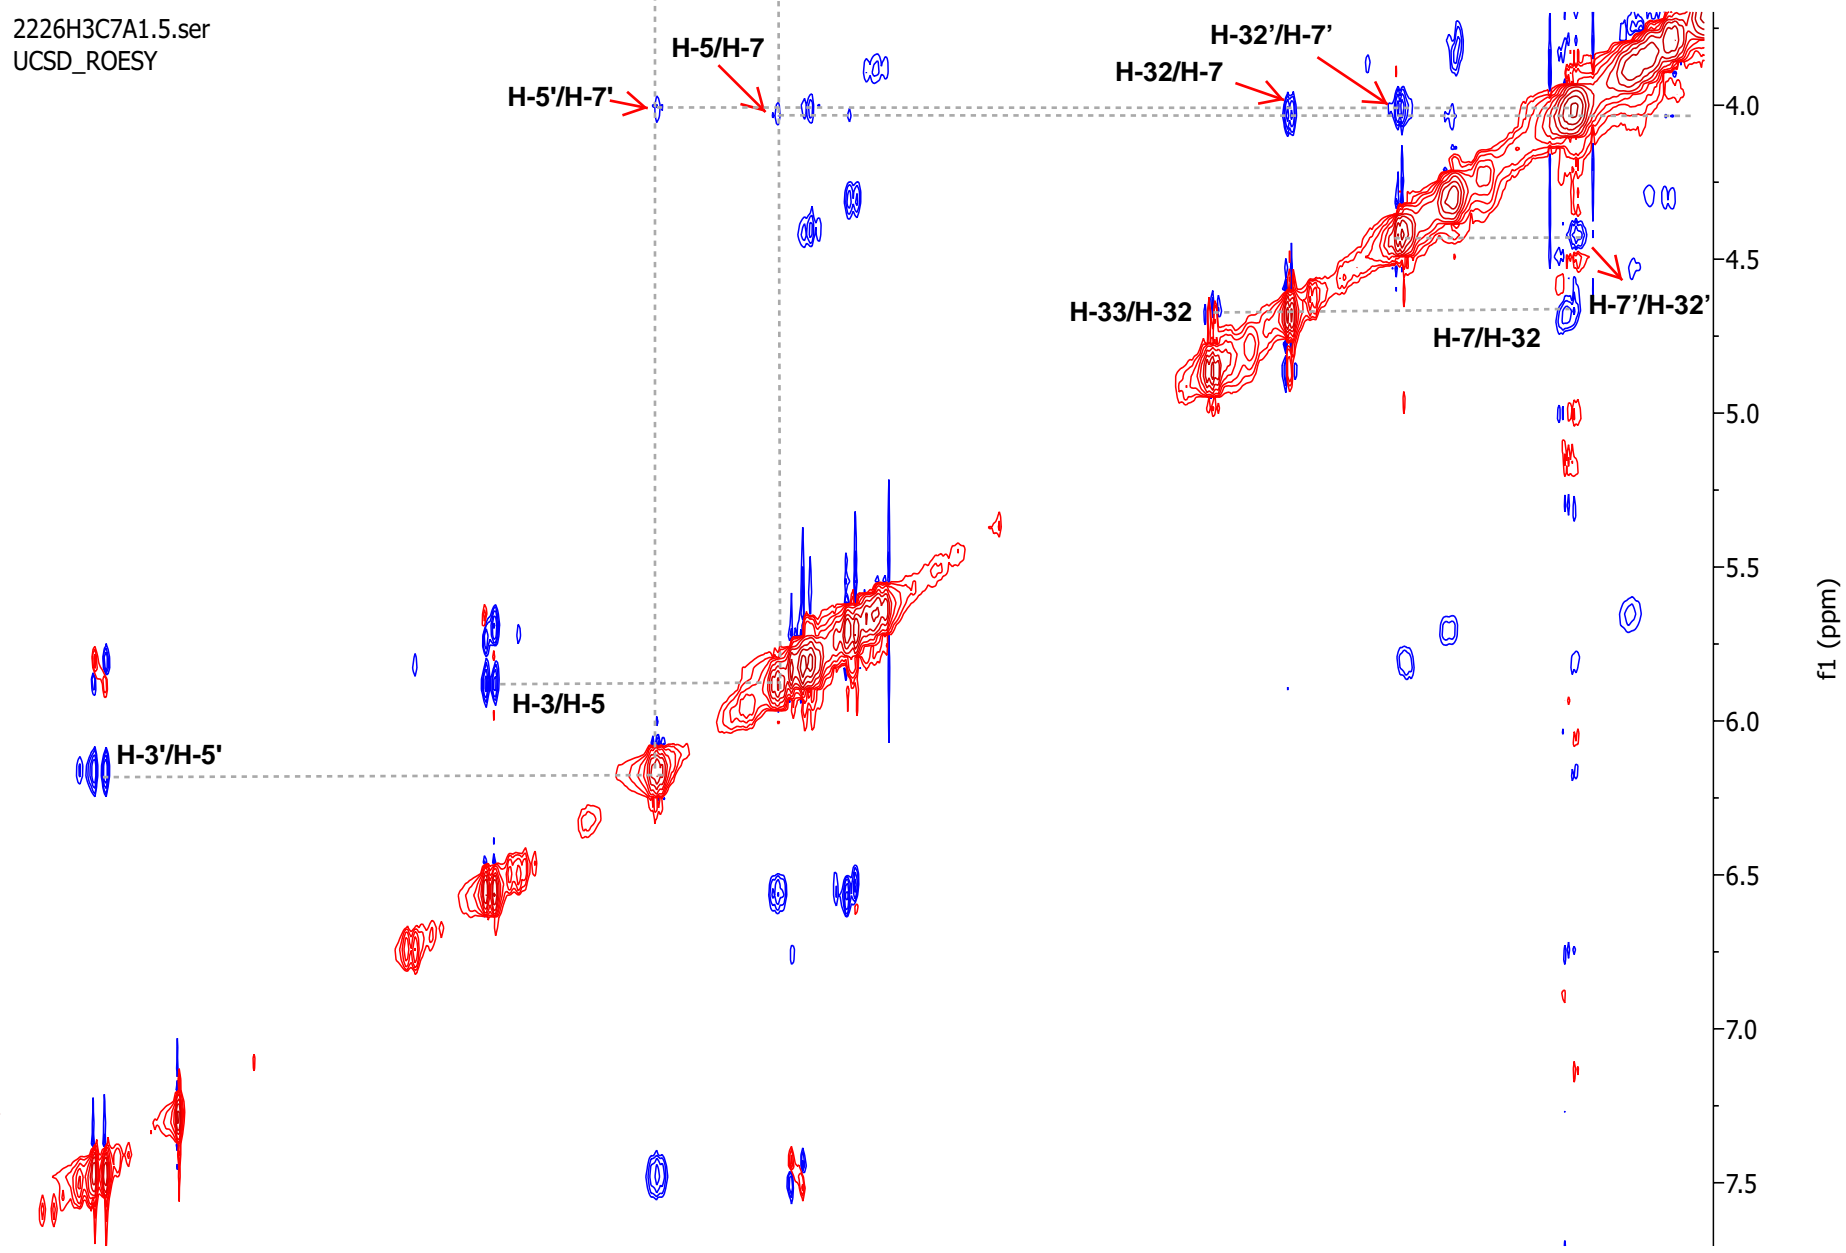

Figure S70 Amplified ROESY spectrum of samholide F (6)

2226H3C9A-a #17-21 RT: 0.41-0.50 AV: 5 SB: 4 0.26-0.33 NL: 9.29E7  
T: + c Full ms [ 300.00-2000.00]

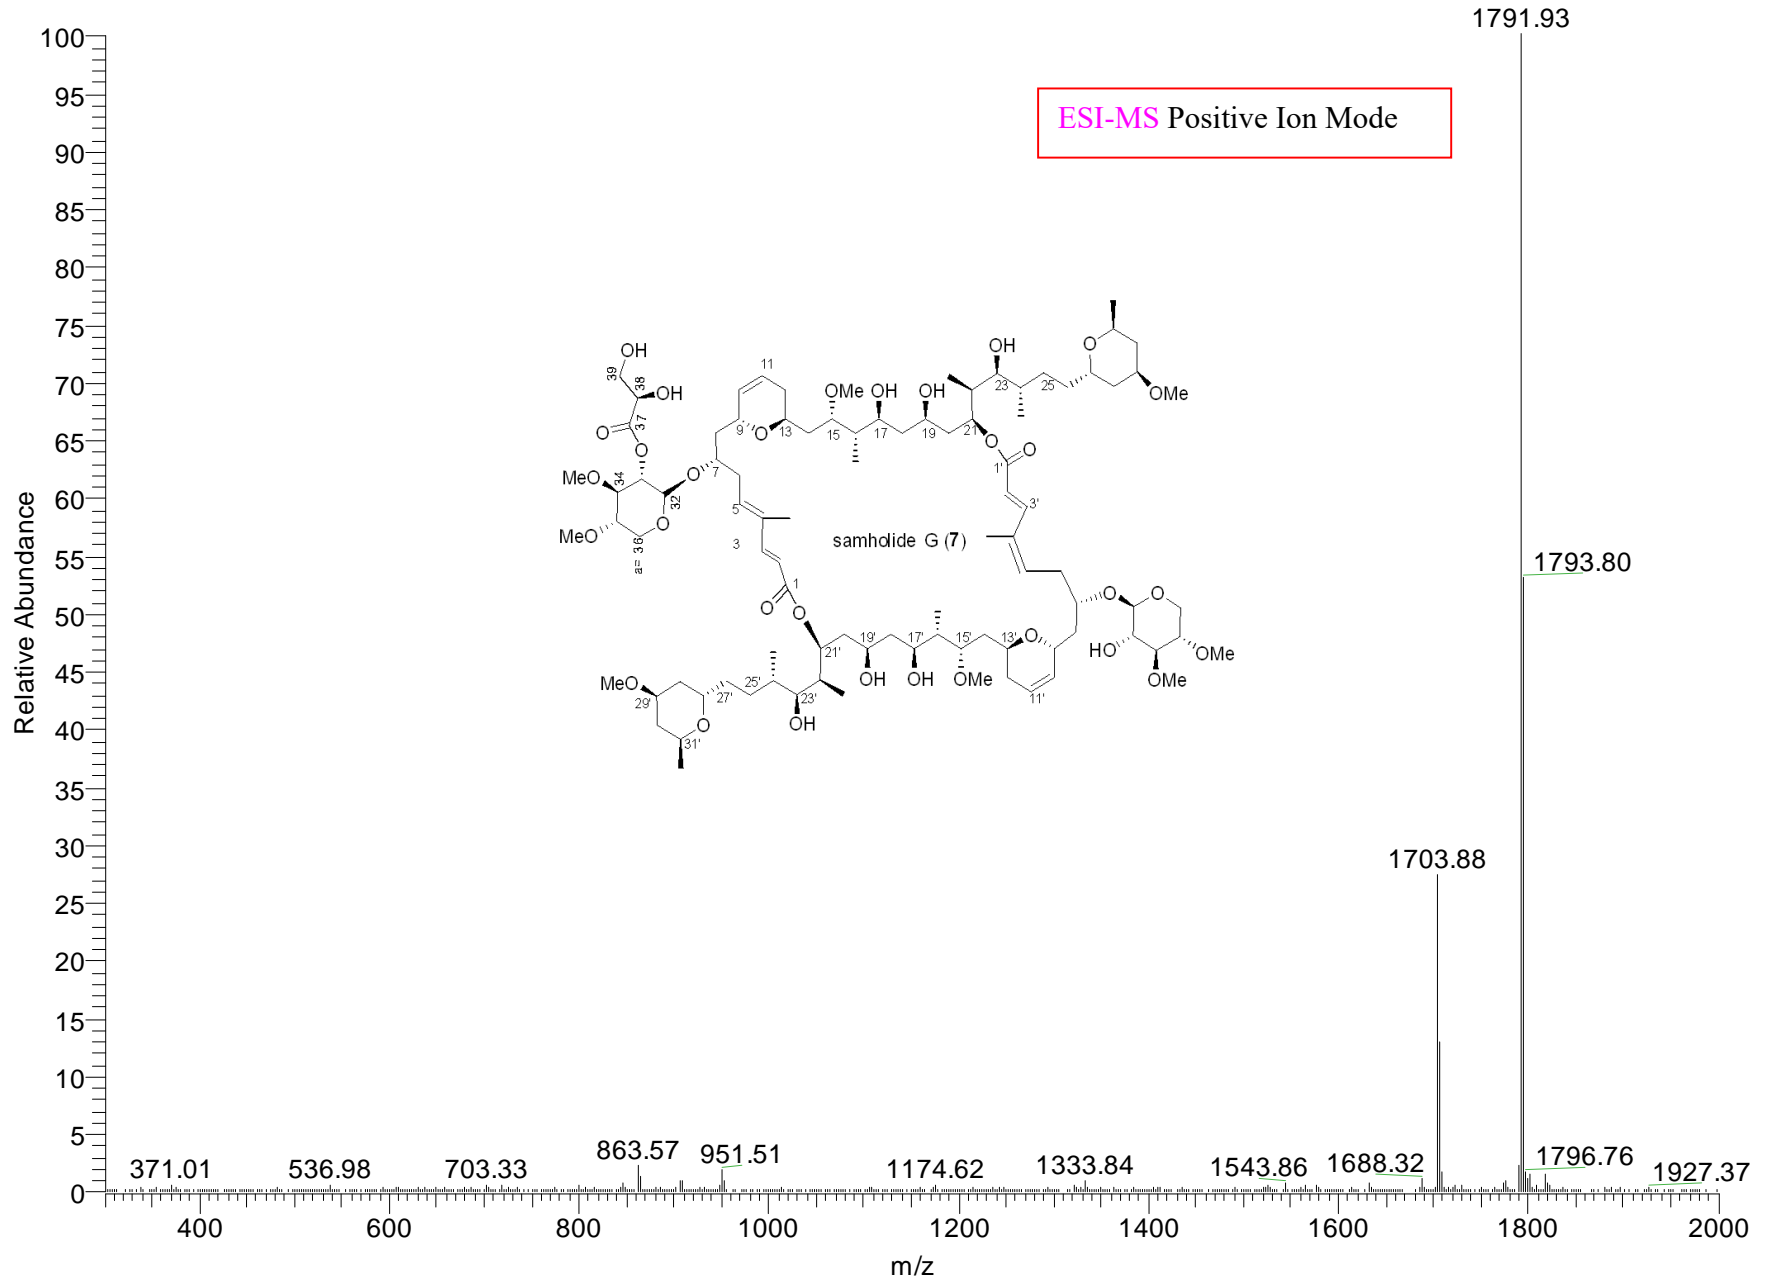

Figure S71 The ESI MS spectrum of samholide G (7)

2226H3C9A-a #33-36 RT: 0.75-0.80 AV: 4 NL: 2.96E7  
F: + c Full ms2 1792.00@35.00 [490.00-2000.00]

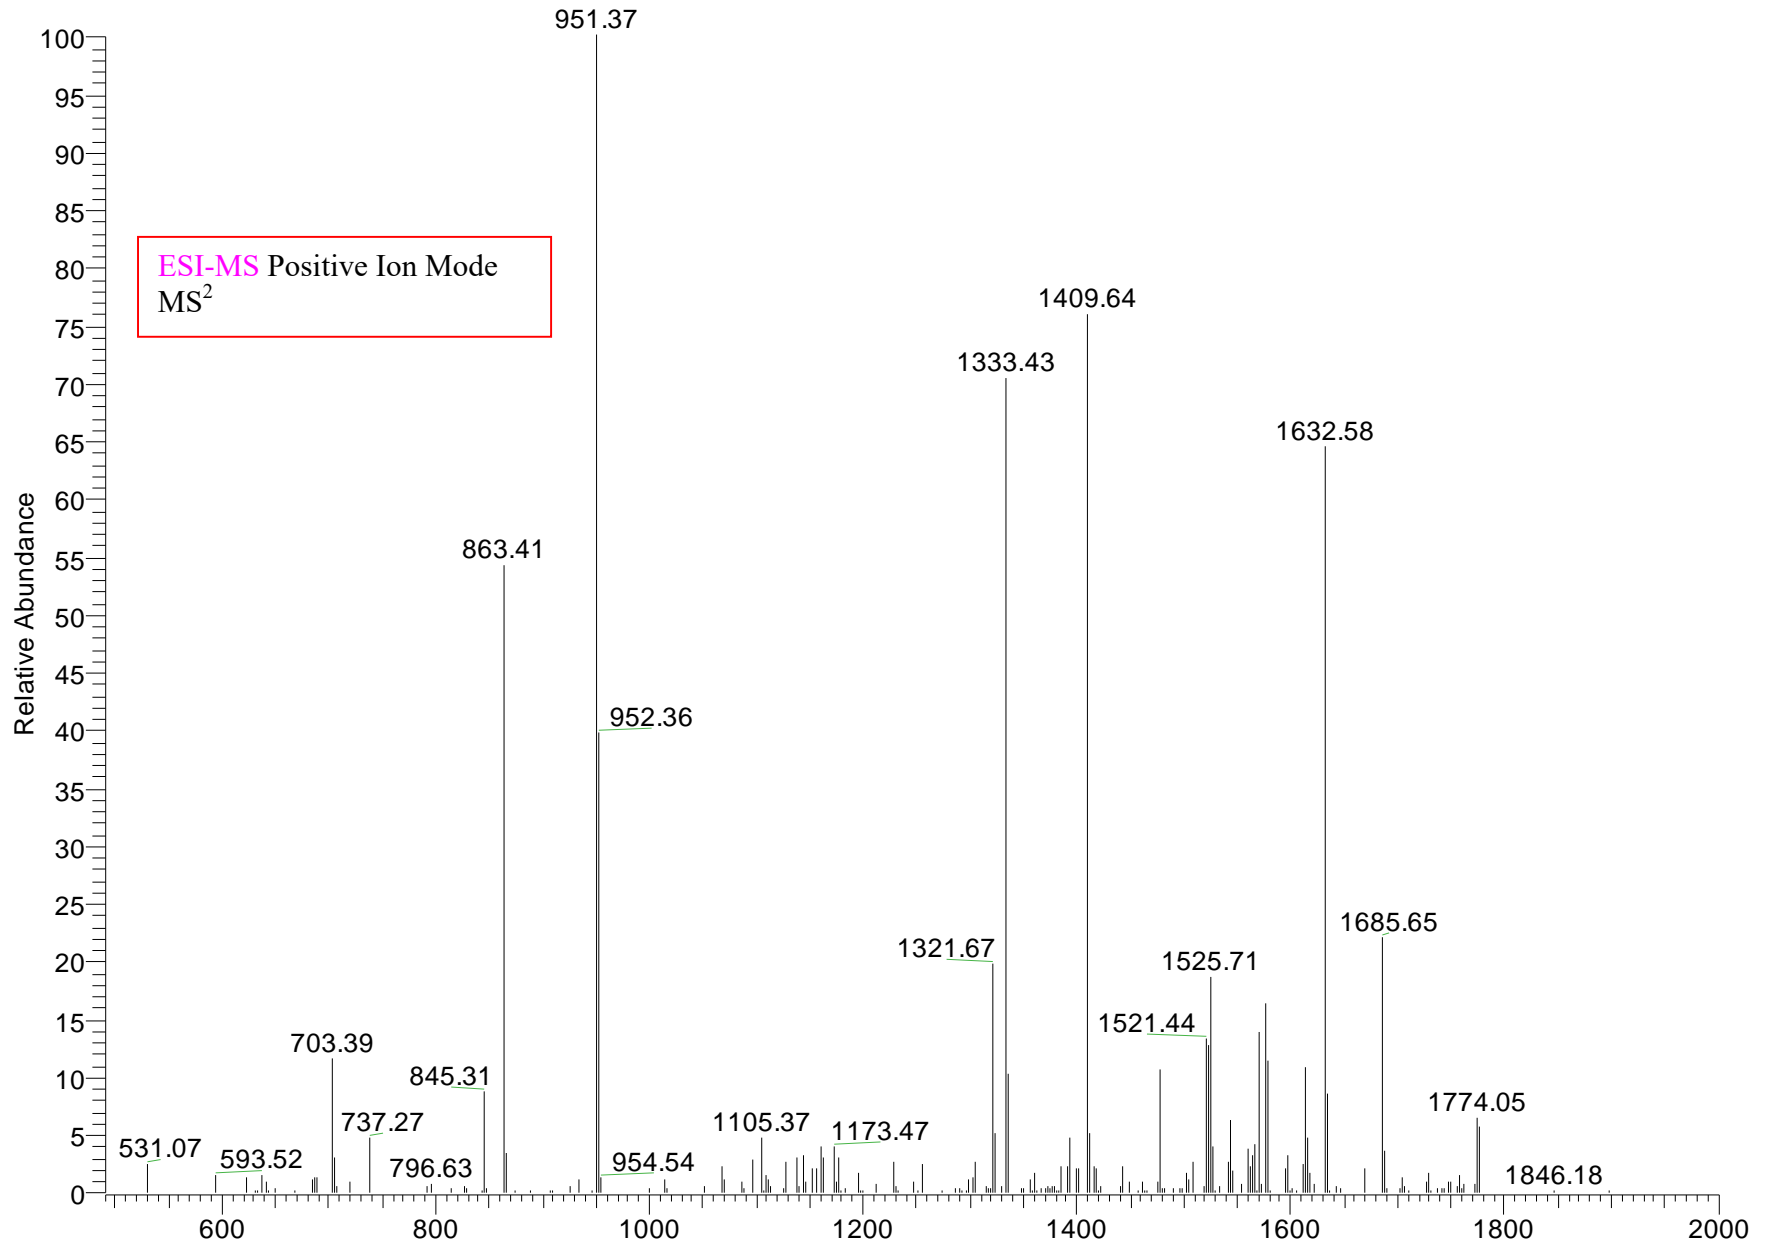

Figure S72 The ESI MS<sup>2</sup> spectrum of samholide G (7)

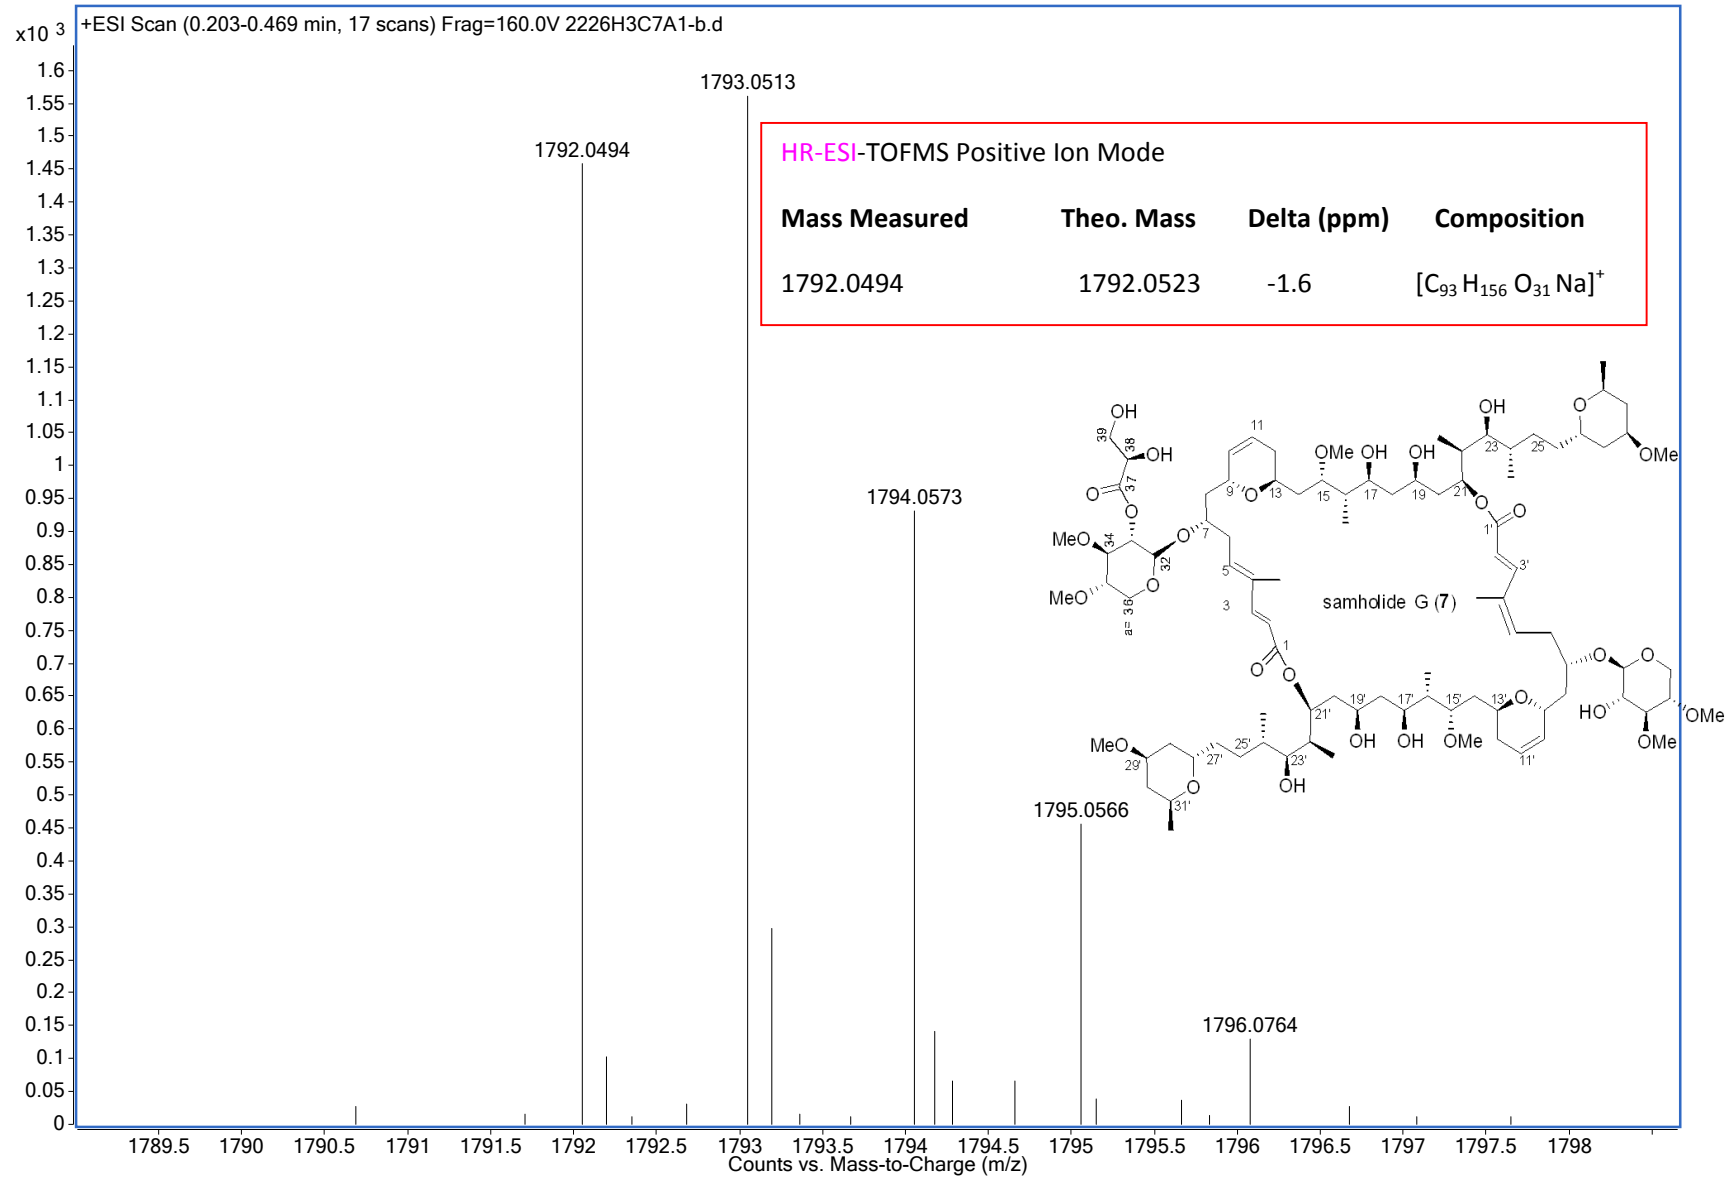

Figure S73 The positive HRESIMS spectrum of samholide G (7)



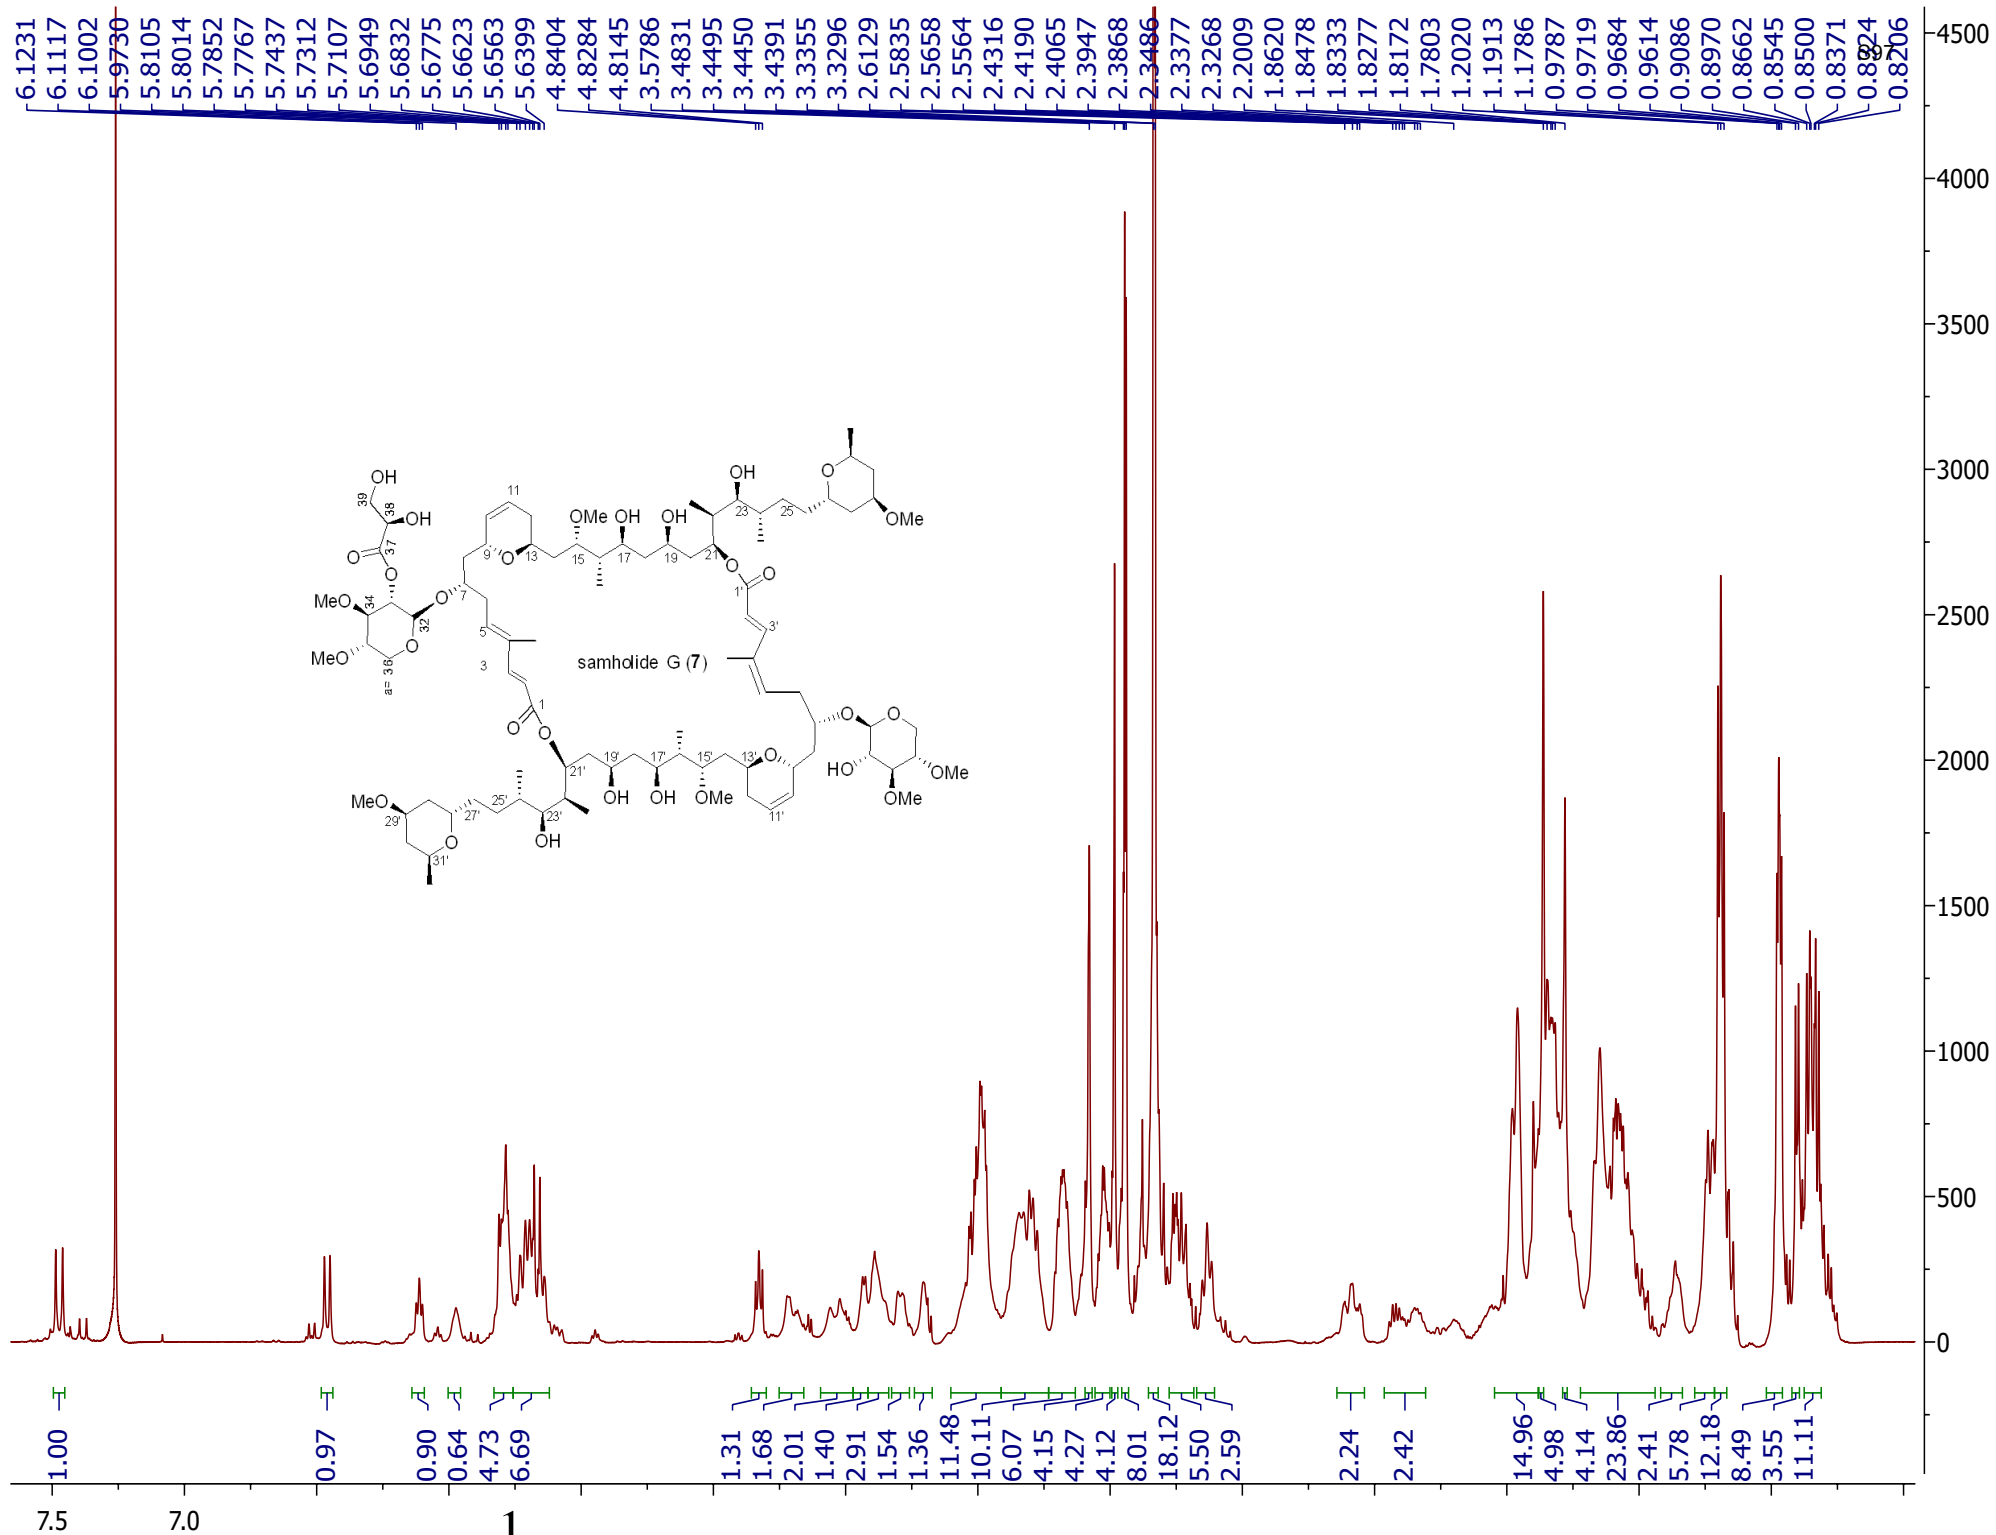

Figure S74  $^1\text{H}$  NMR (600 MHz, DMSO) spectrum of samholide G (7)

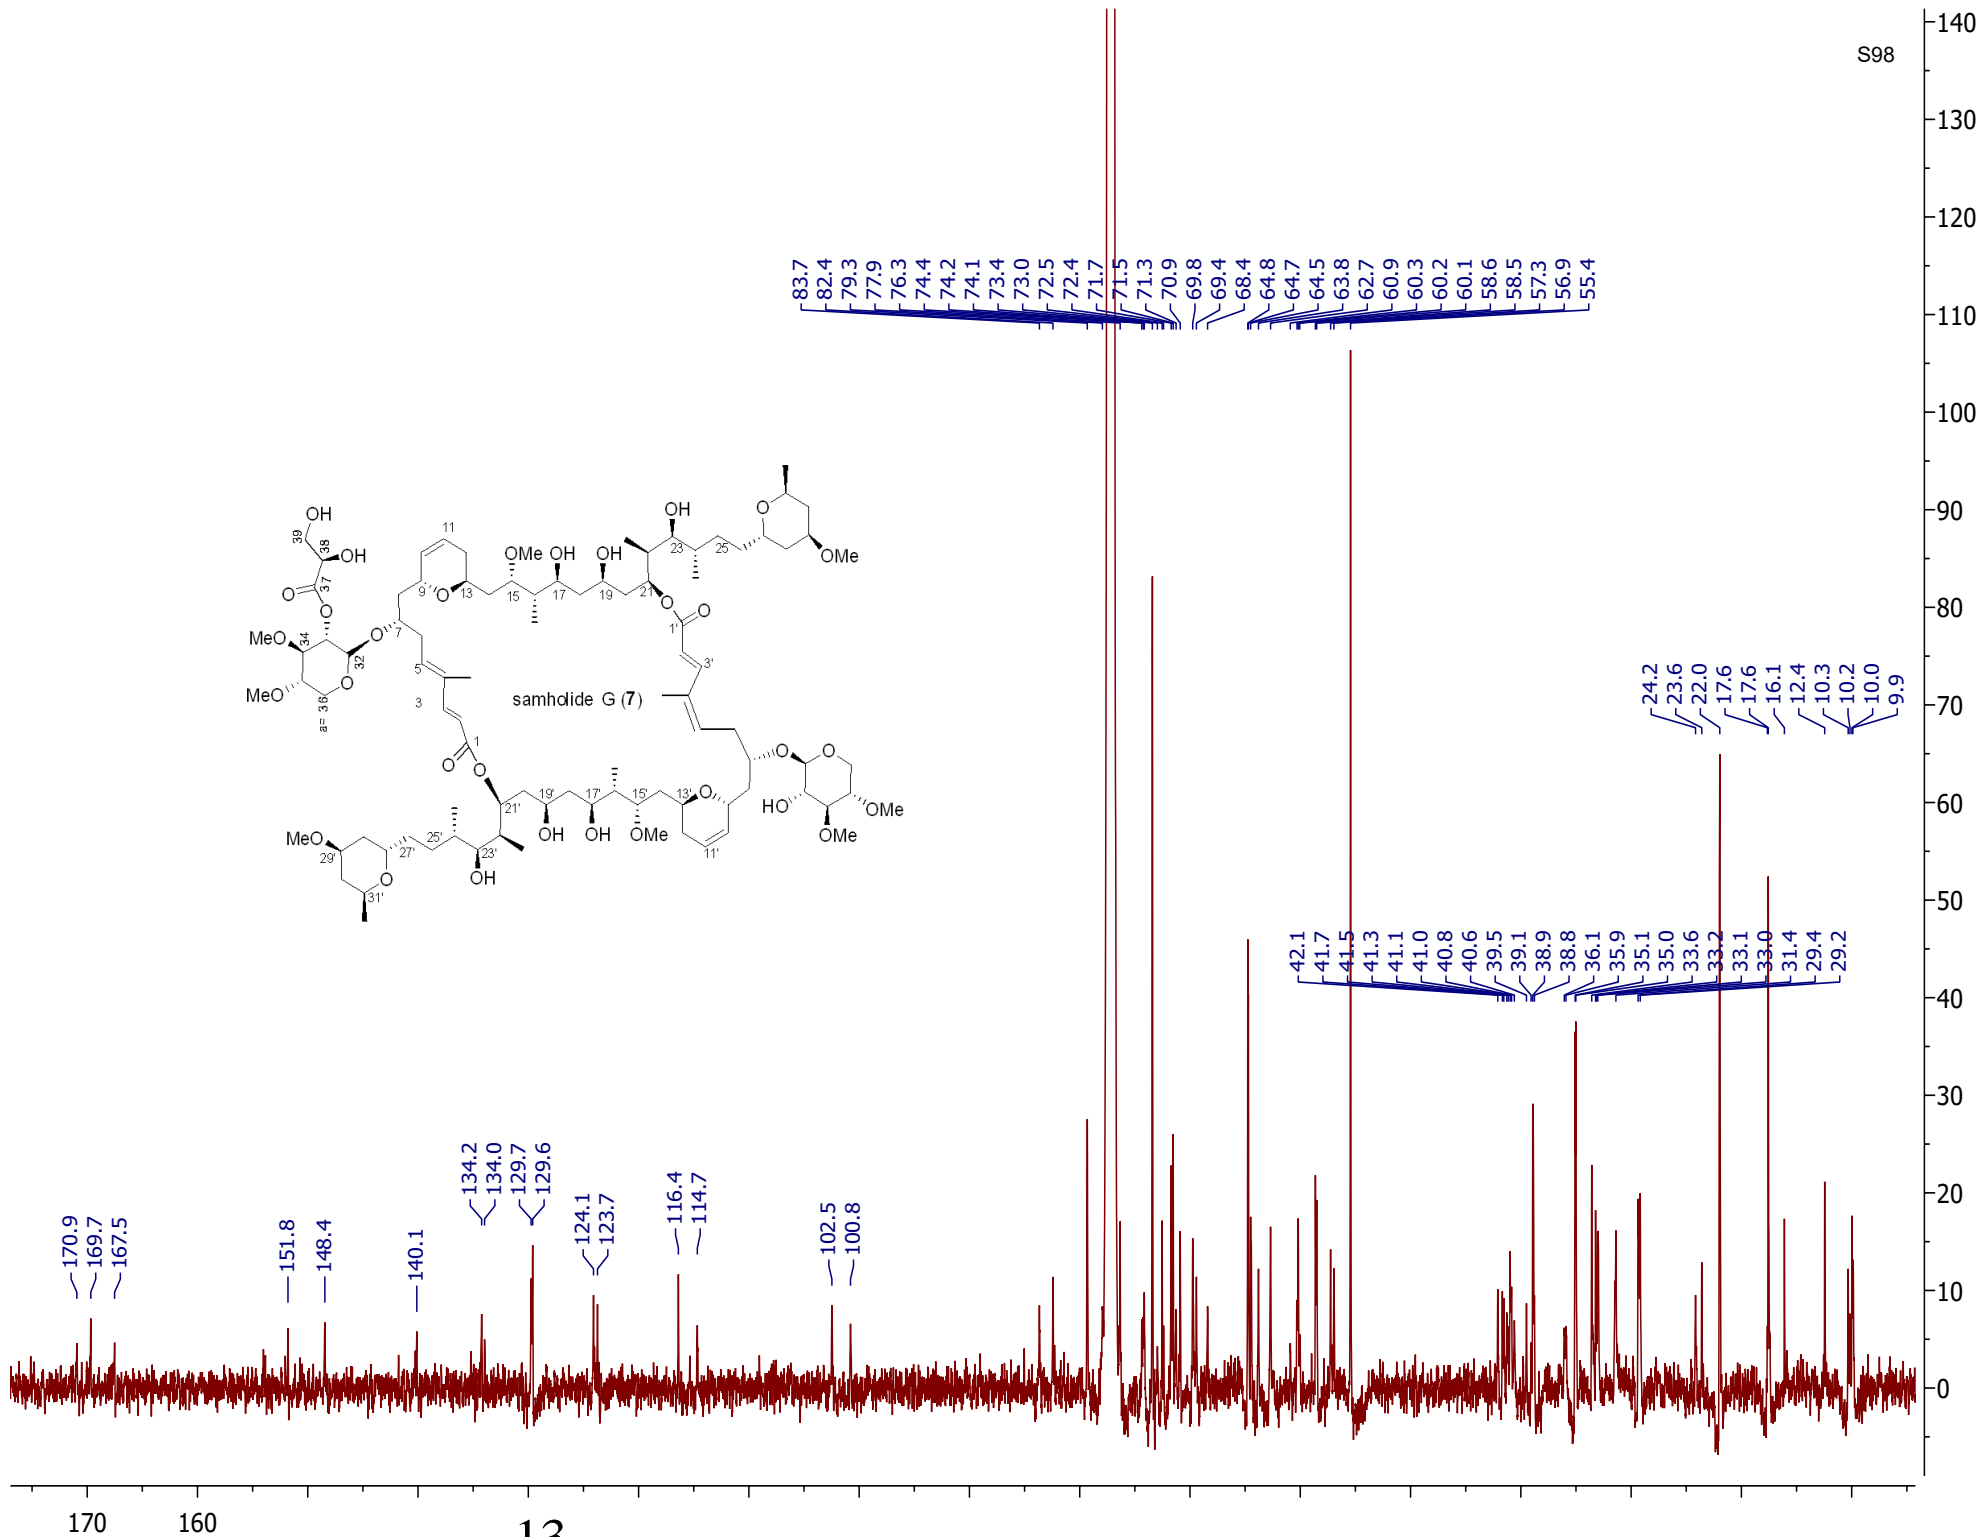

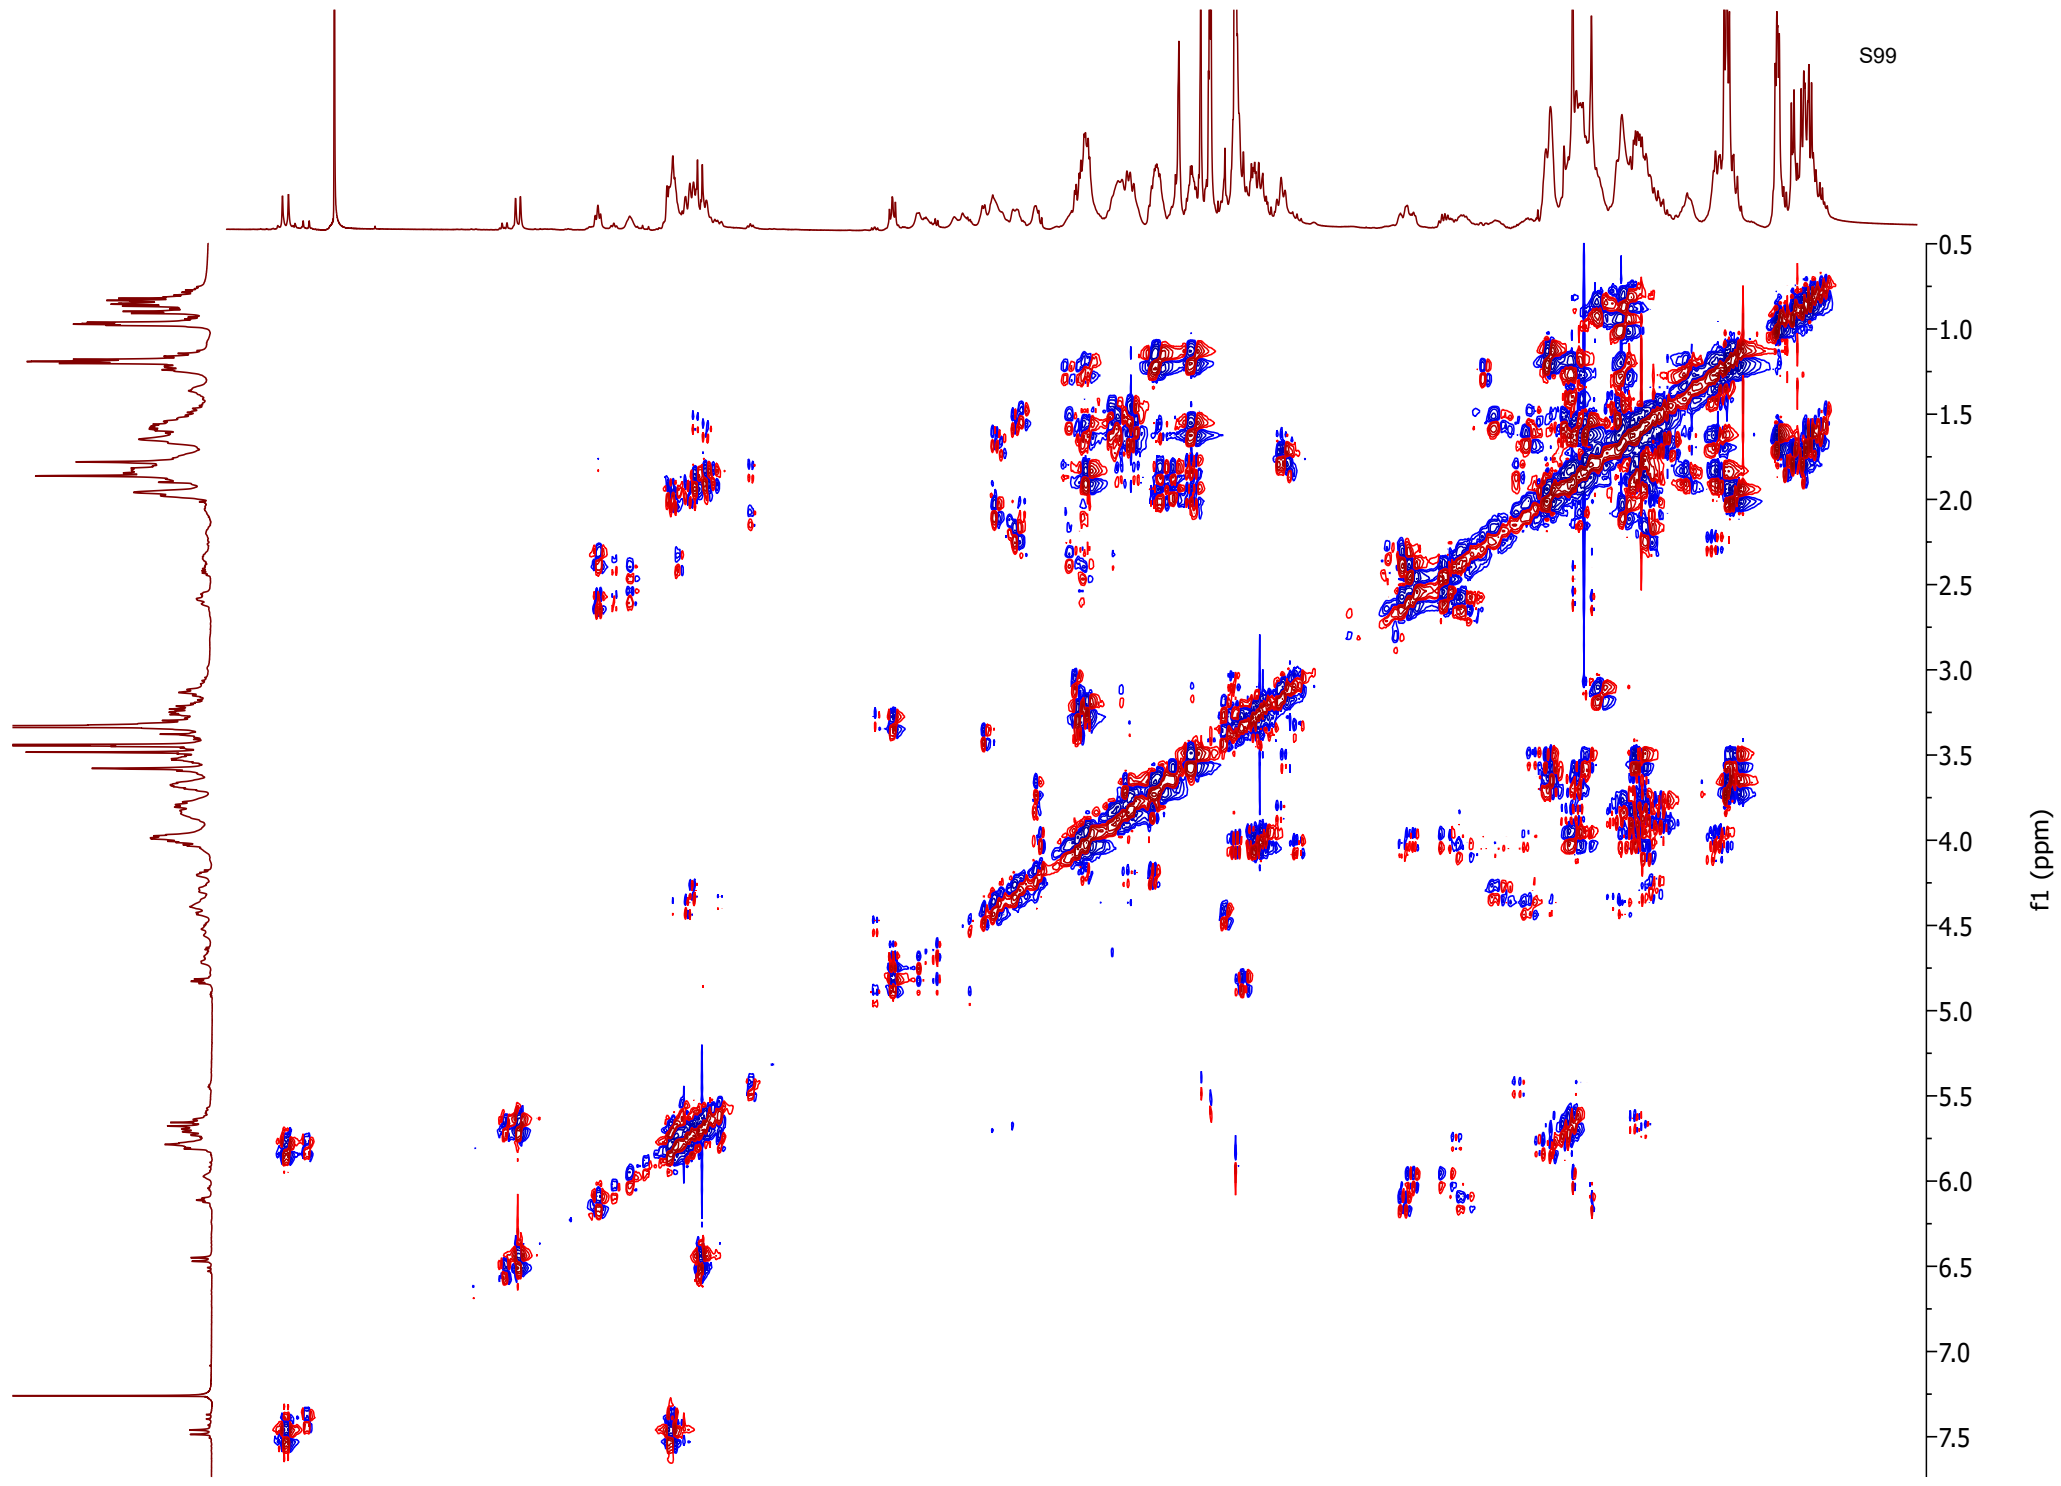

Figure S76  $^1\text{H}$ - $^1\text{H}$  COSY spectrum of samholide G (7)

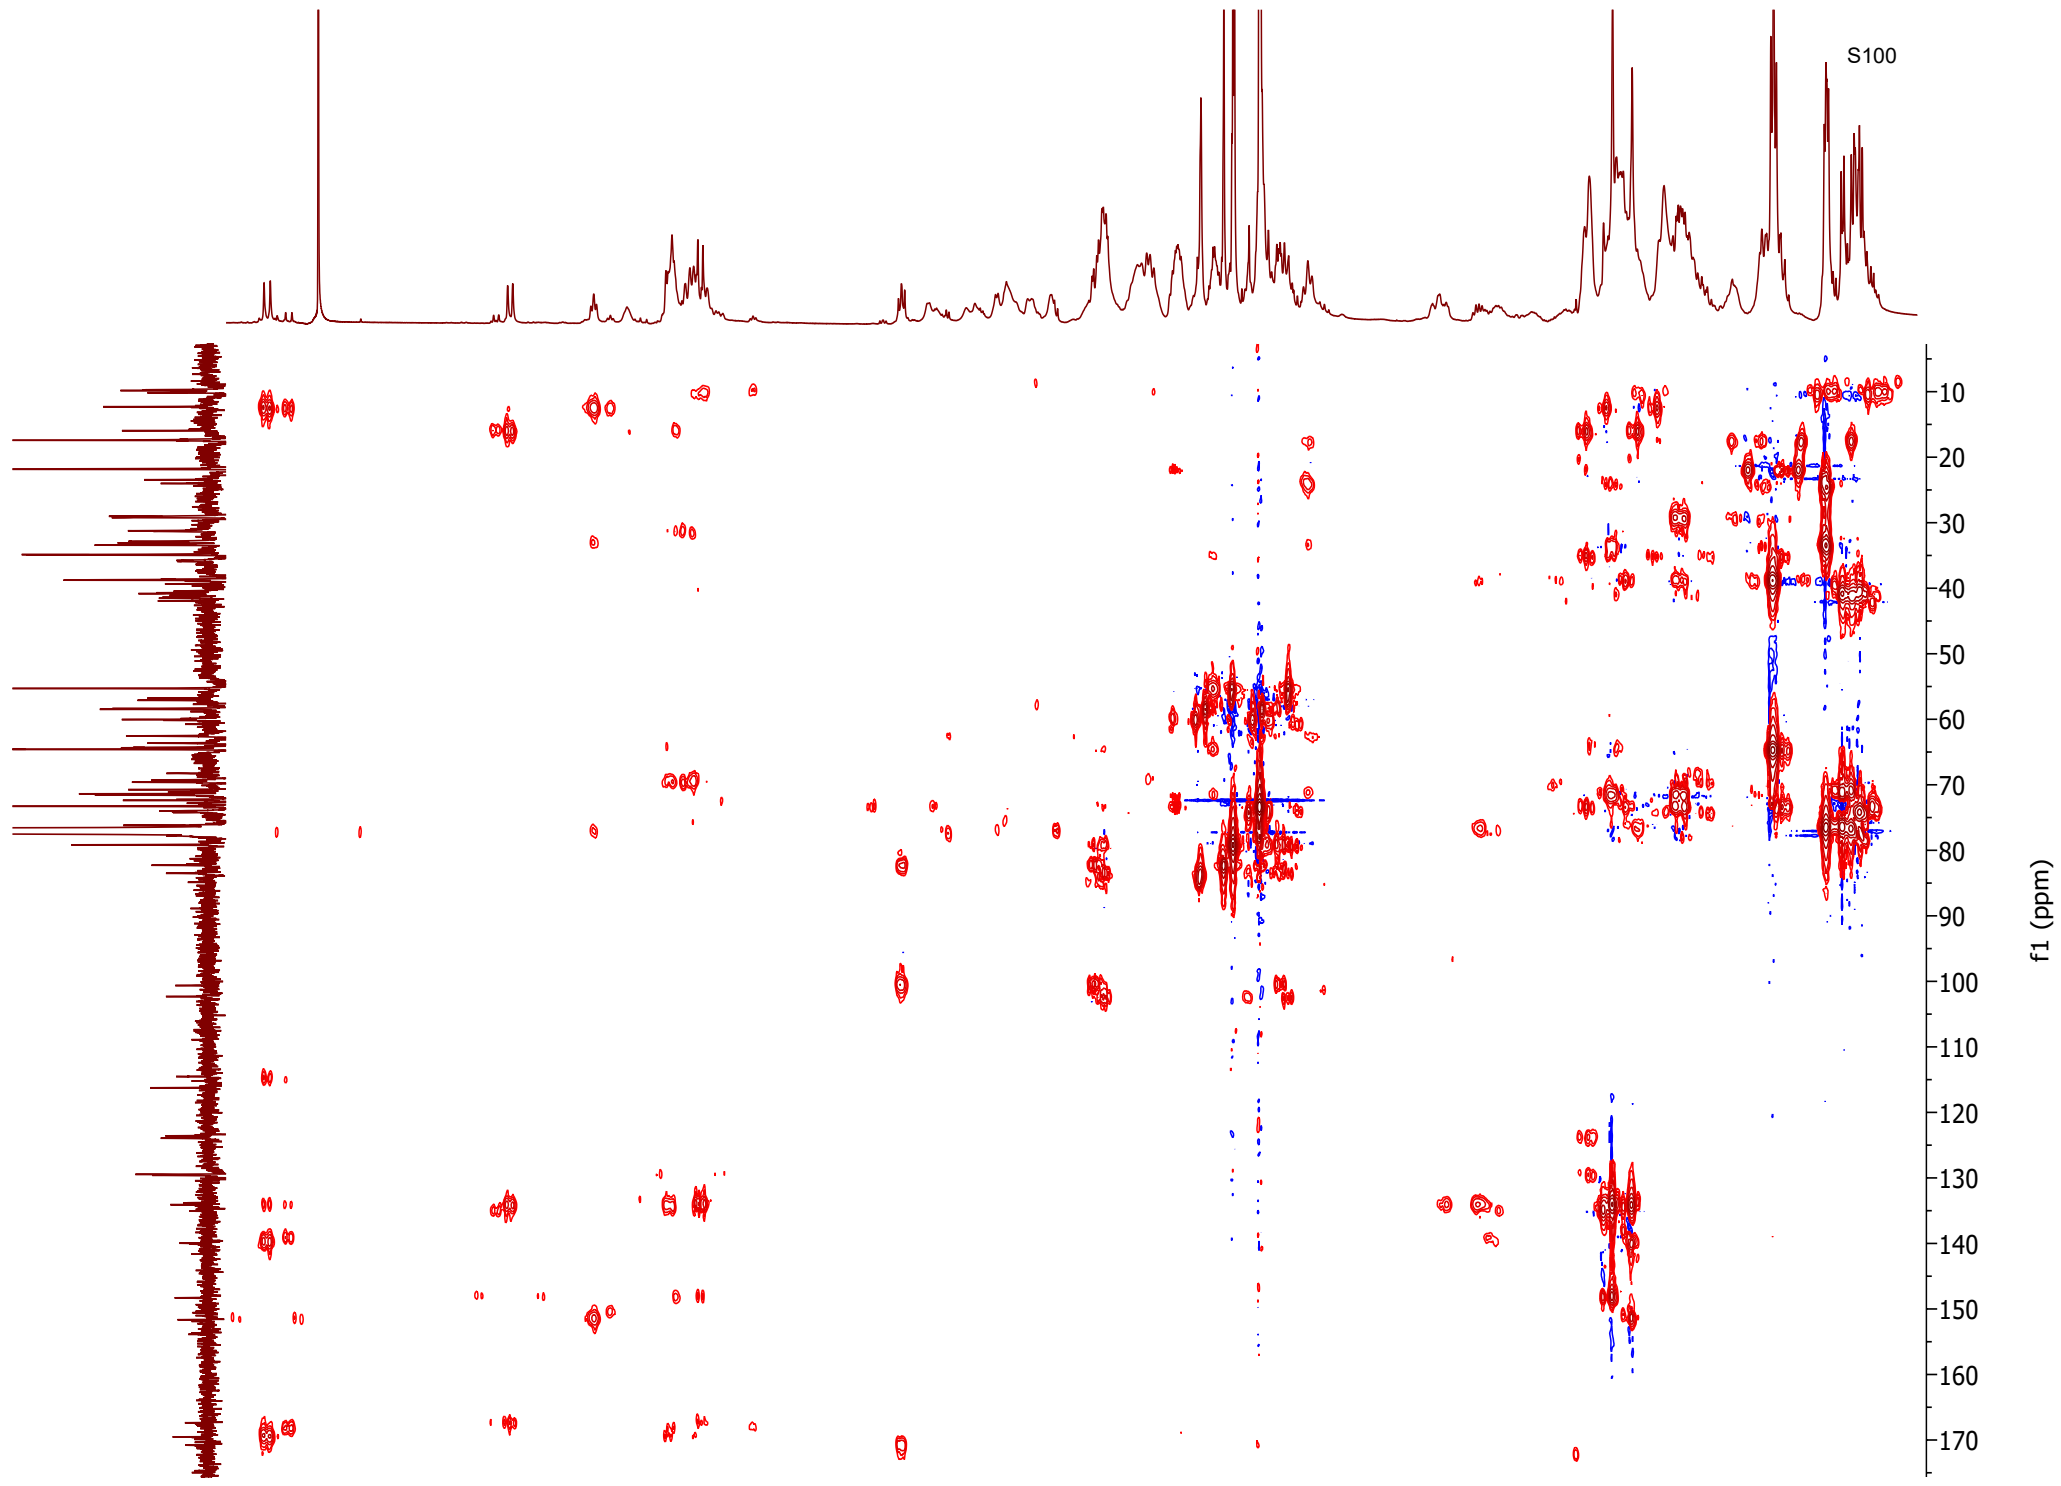

Figure S77 HMBC spectrum of samholide G (7)

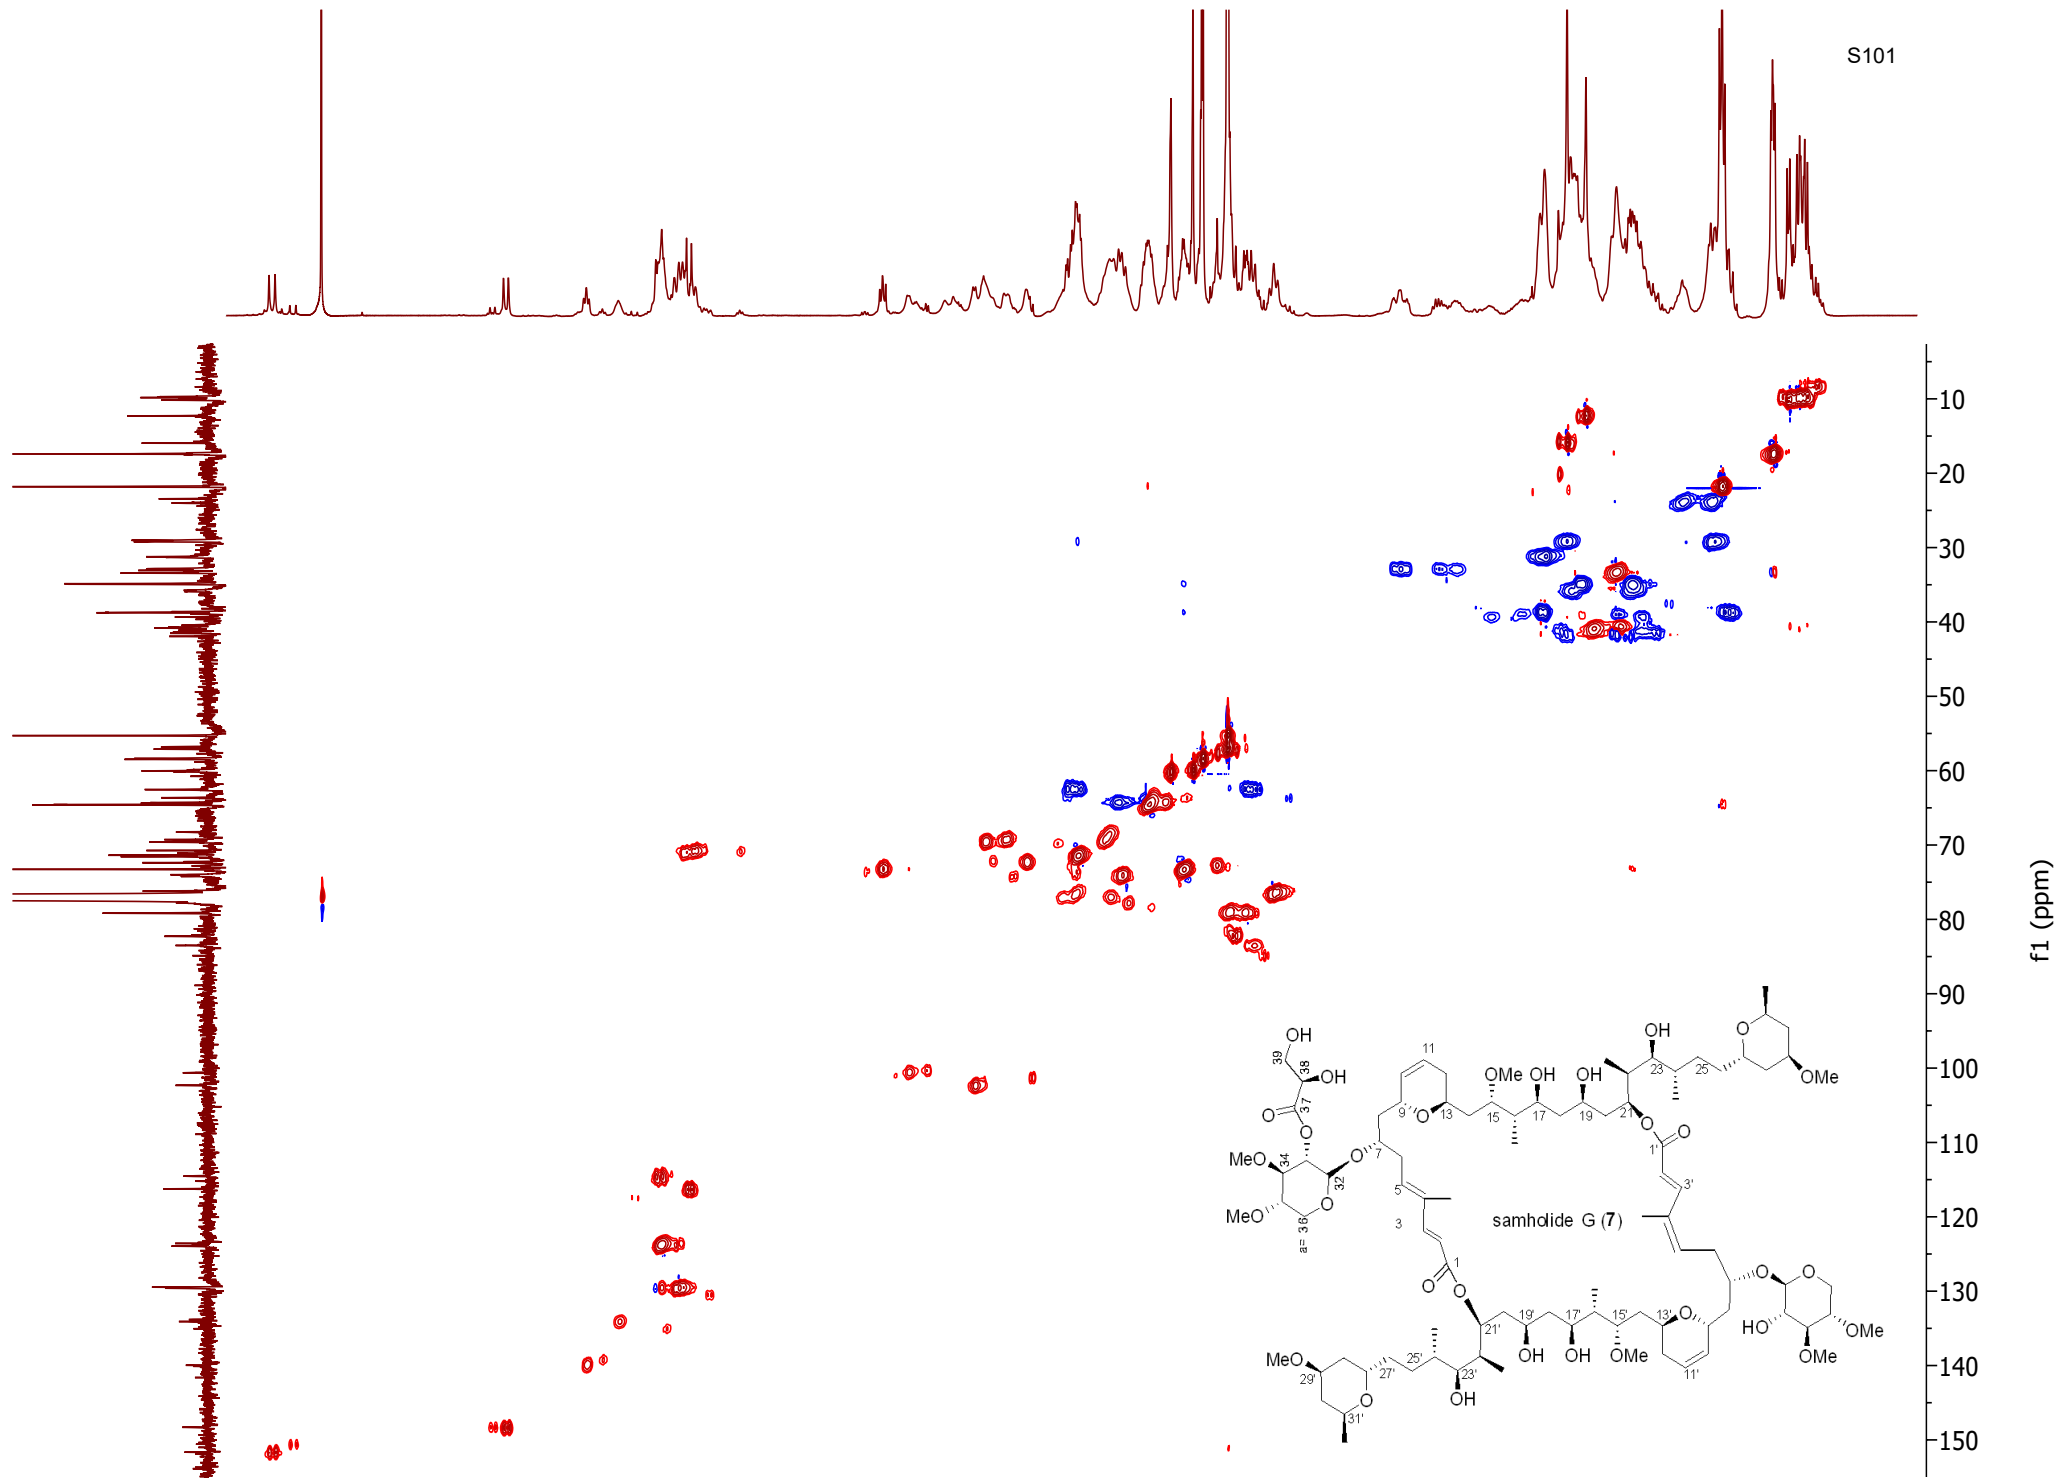

Figure S78 HMBC spectrum of samholide G (7)

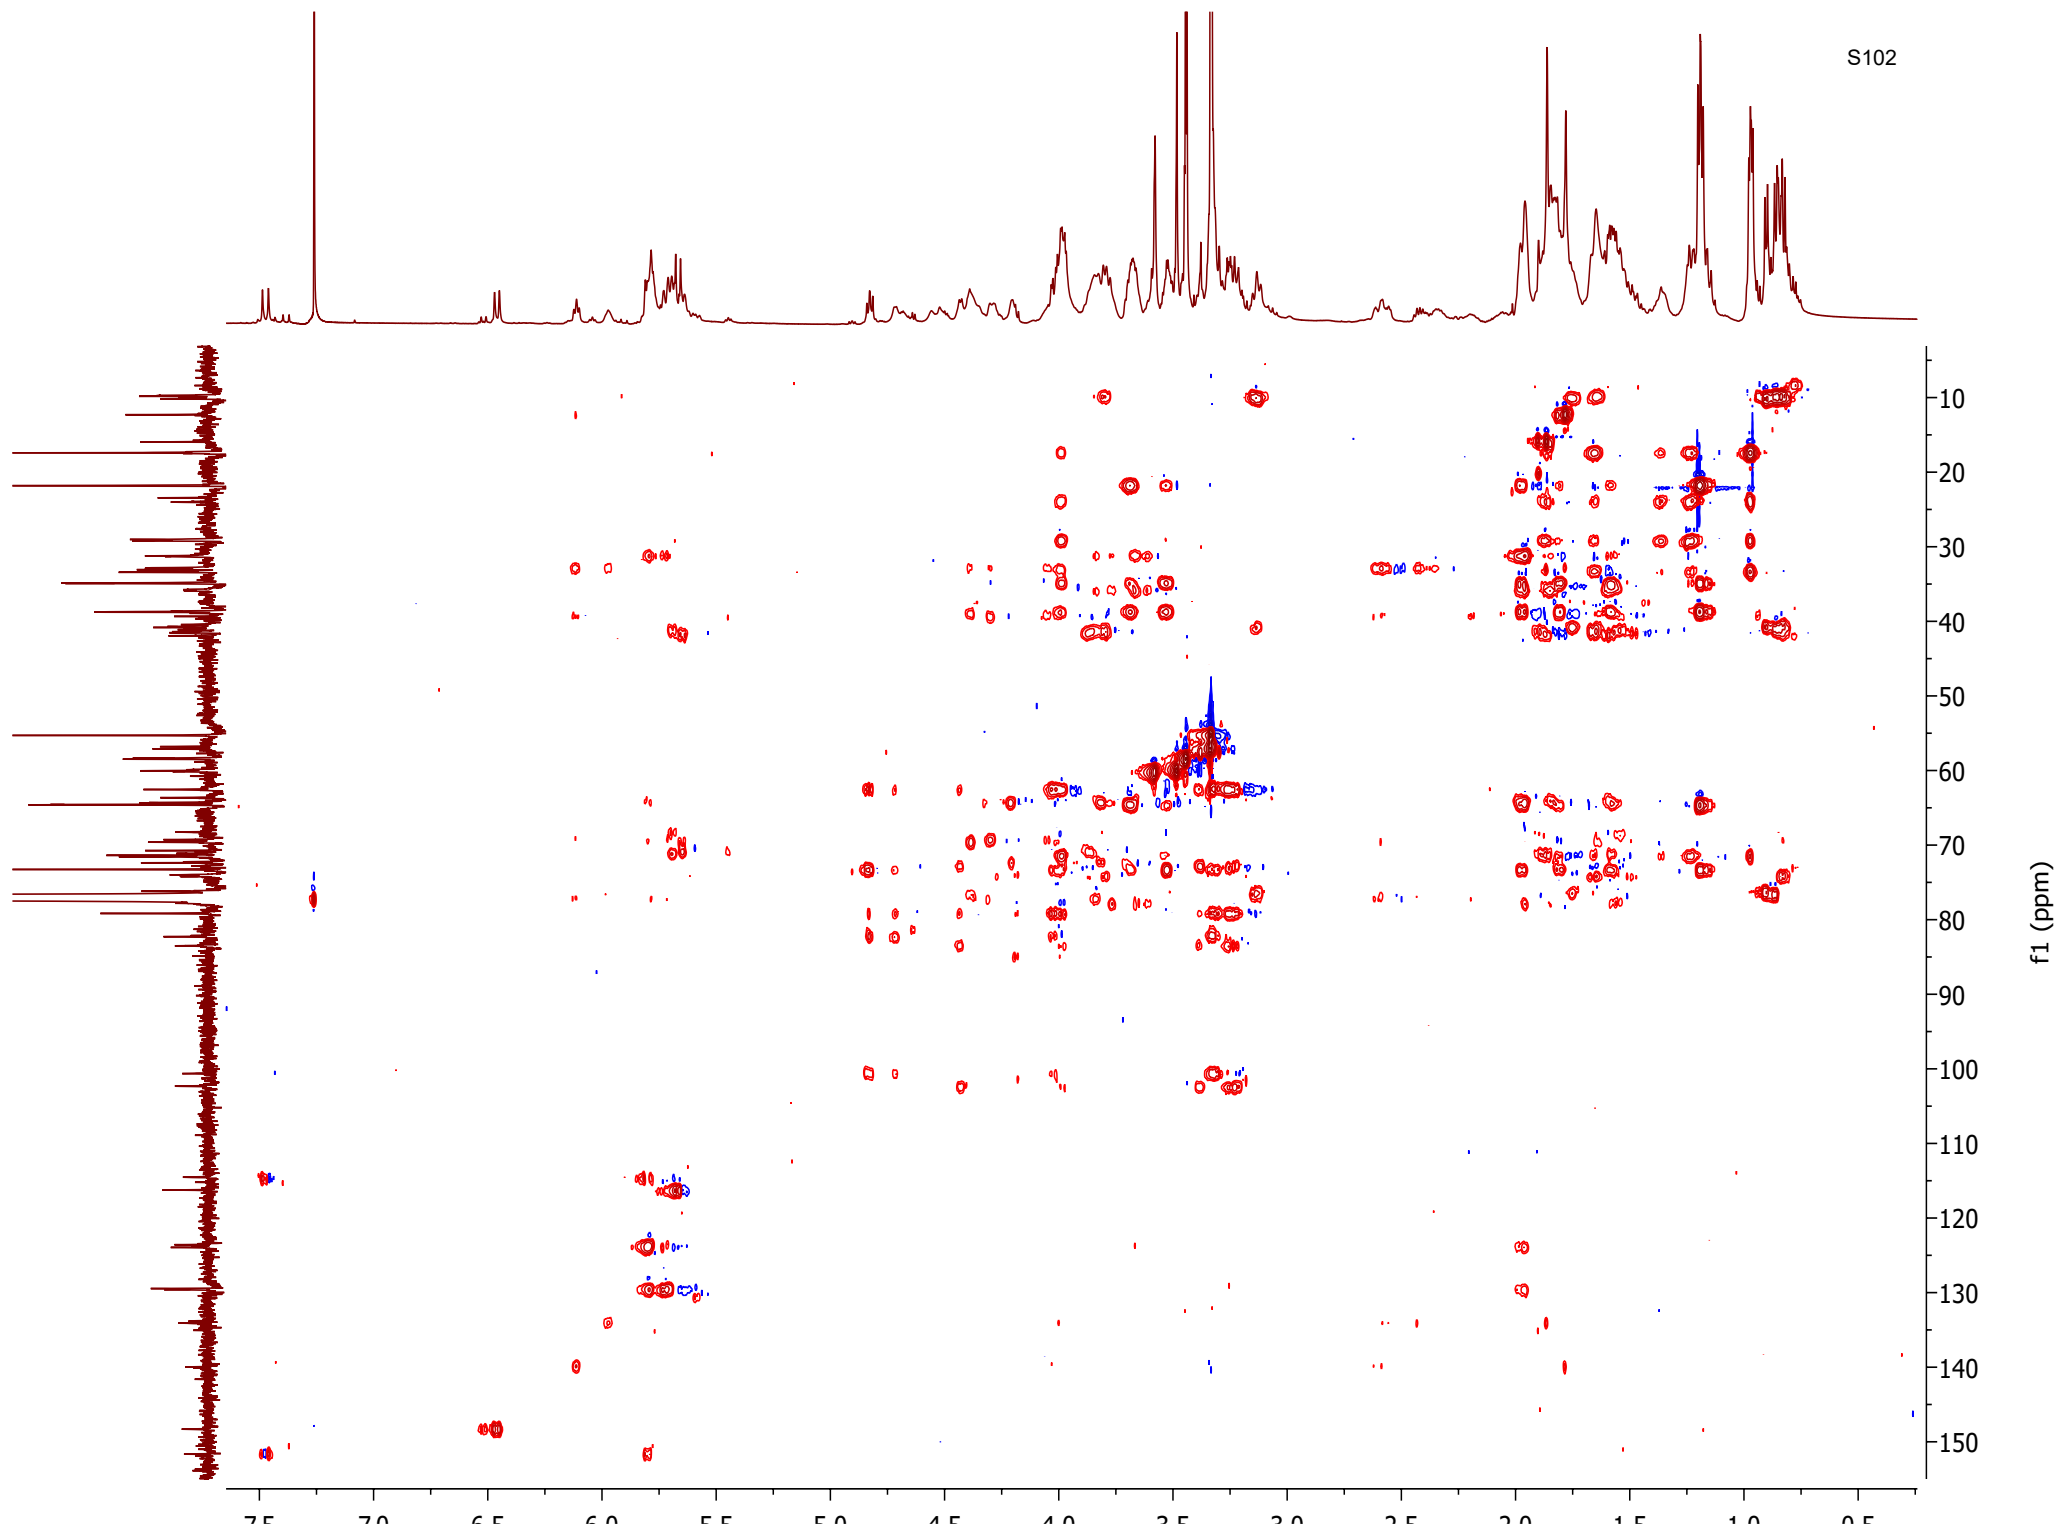

Figure S79 HSQC-TOCSY spectrum of samholide G (7)

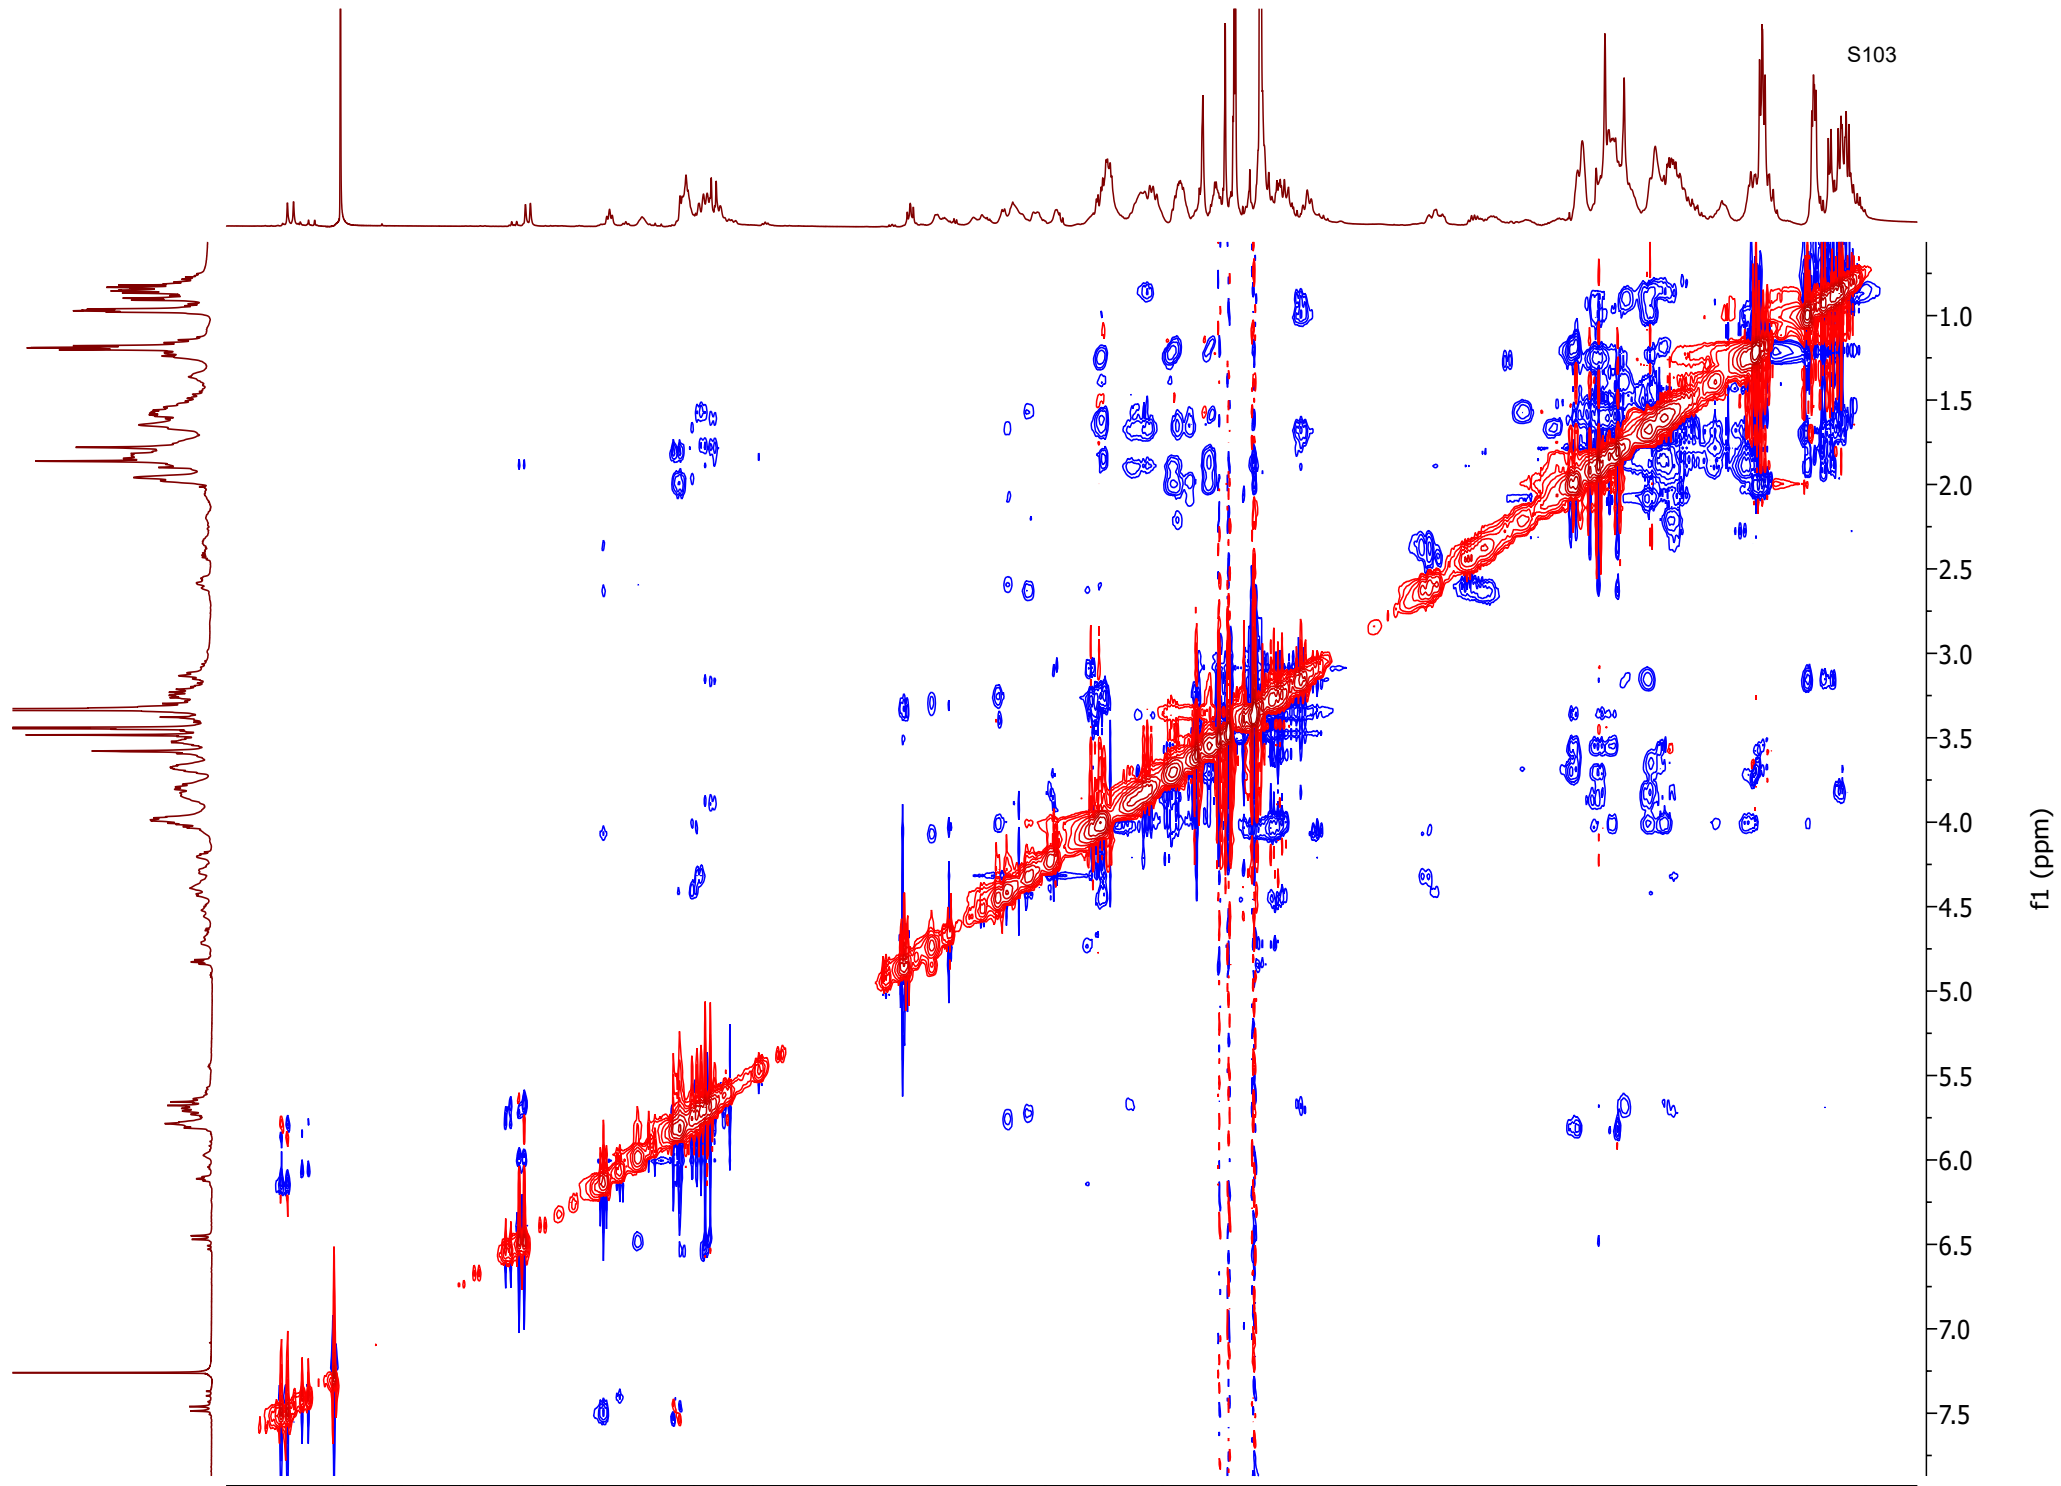

Figure S80 ROESY spectrum of samholide G (7)

2226H3CB4A-a #12-15 RT: 0.28-0.35 AV: 4 SB: 3 0.18-0.23 NL: 1.72E6

T: + c Full ms [ 300.00-2000.00]

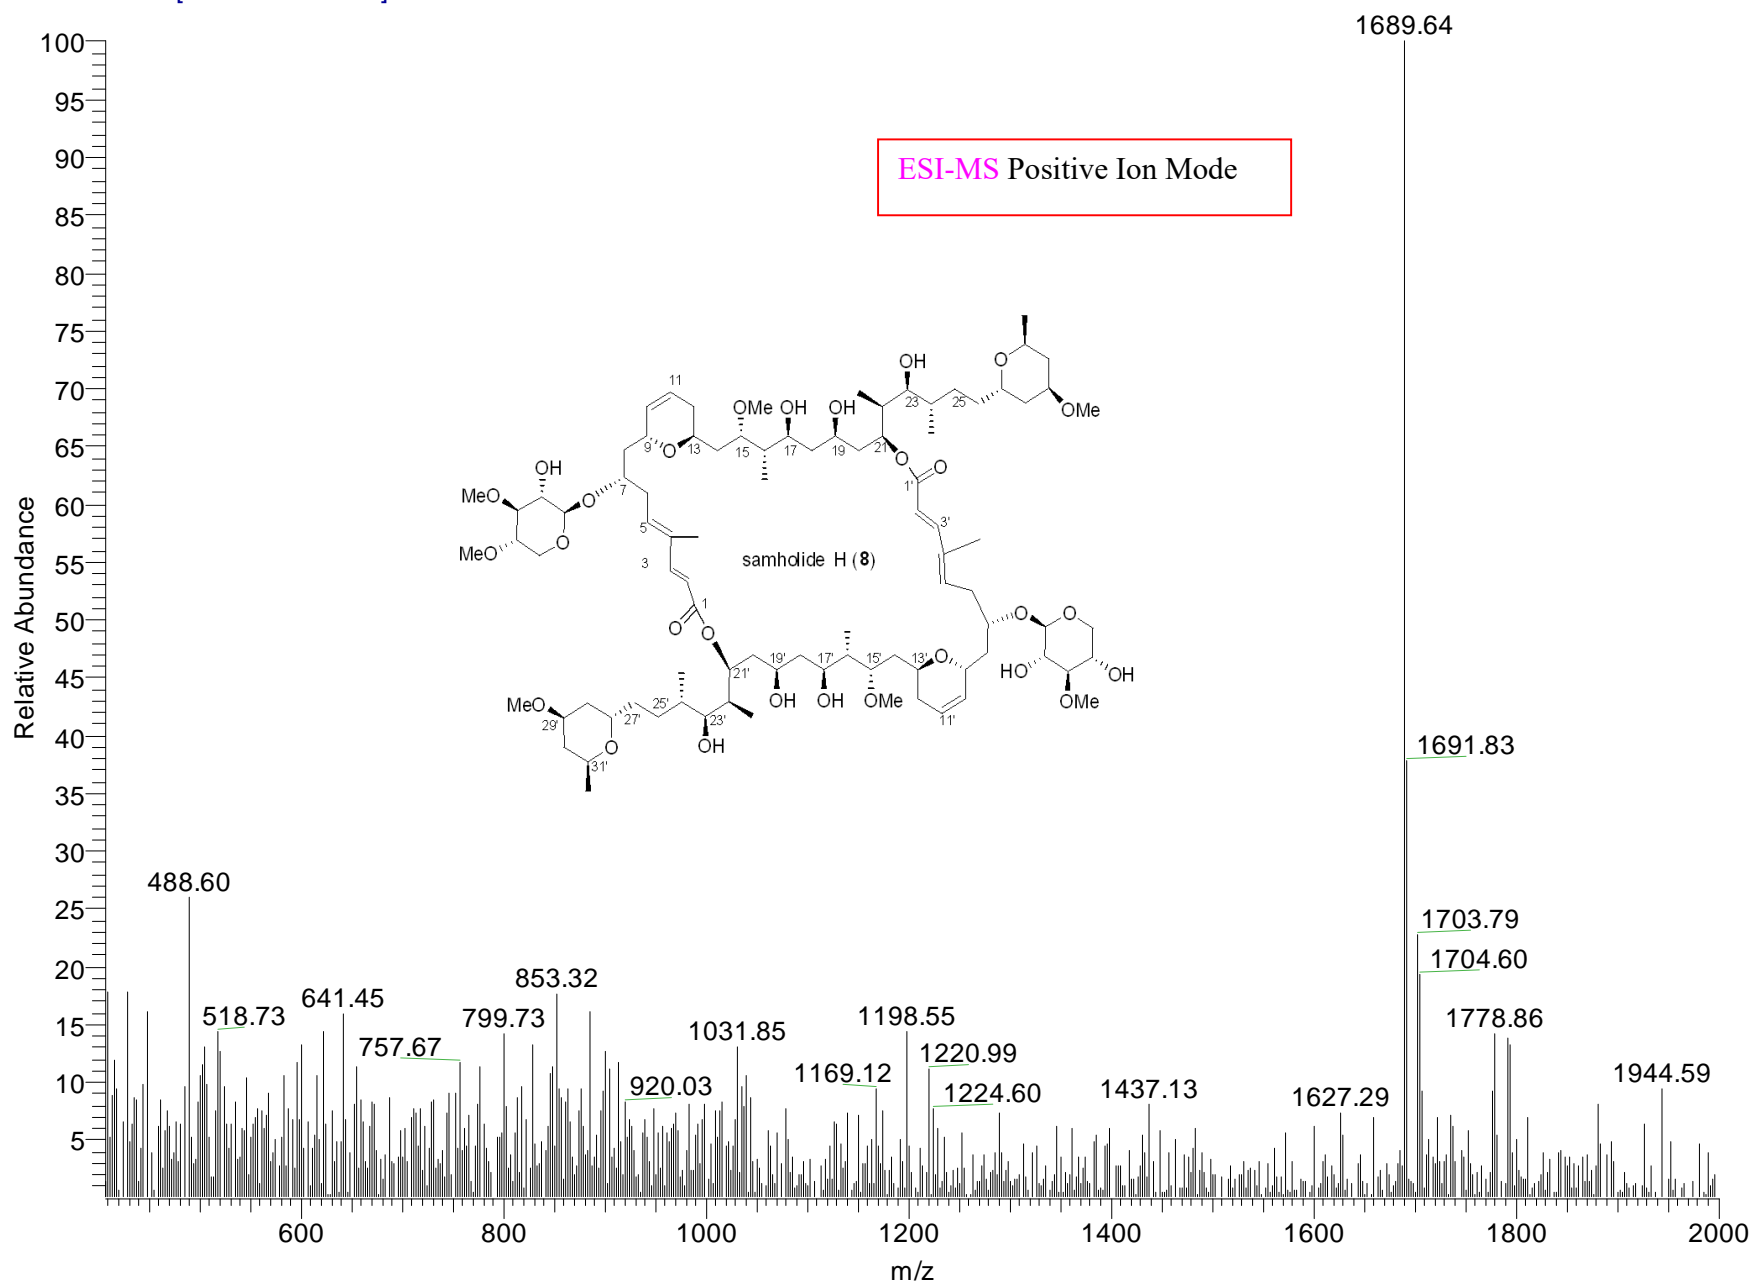

Figure S81 The ESI MS spectrum of samholide H (8)



2226H3CB4A-a #55-73 RT: 1.30-1.62 AV: 19 NL: 3.56E5

F: + c Full ms2 1690.00@35.00 [465.00-2000.00]

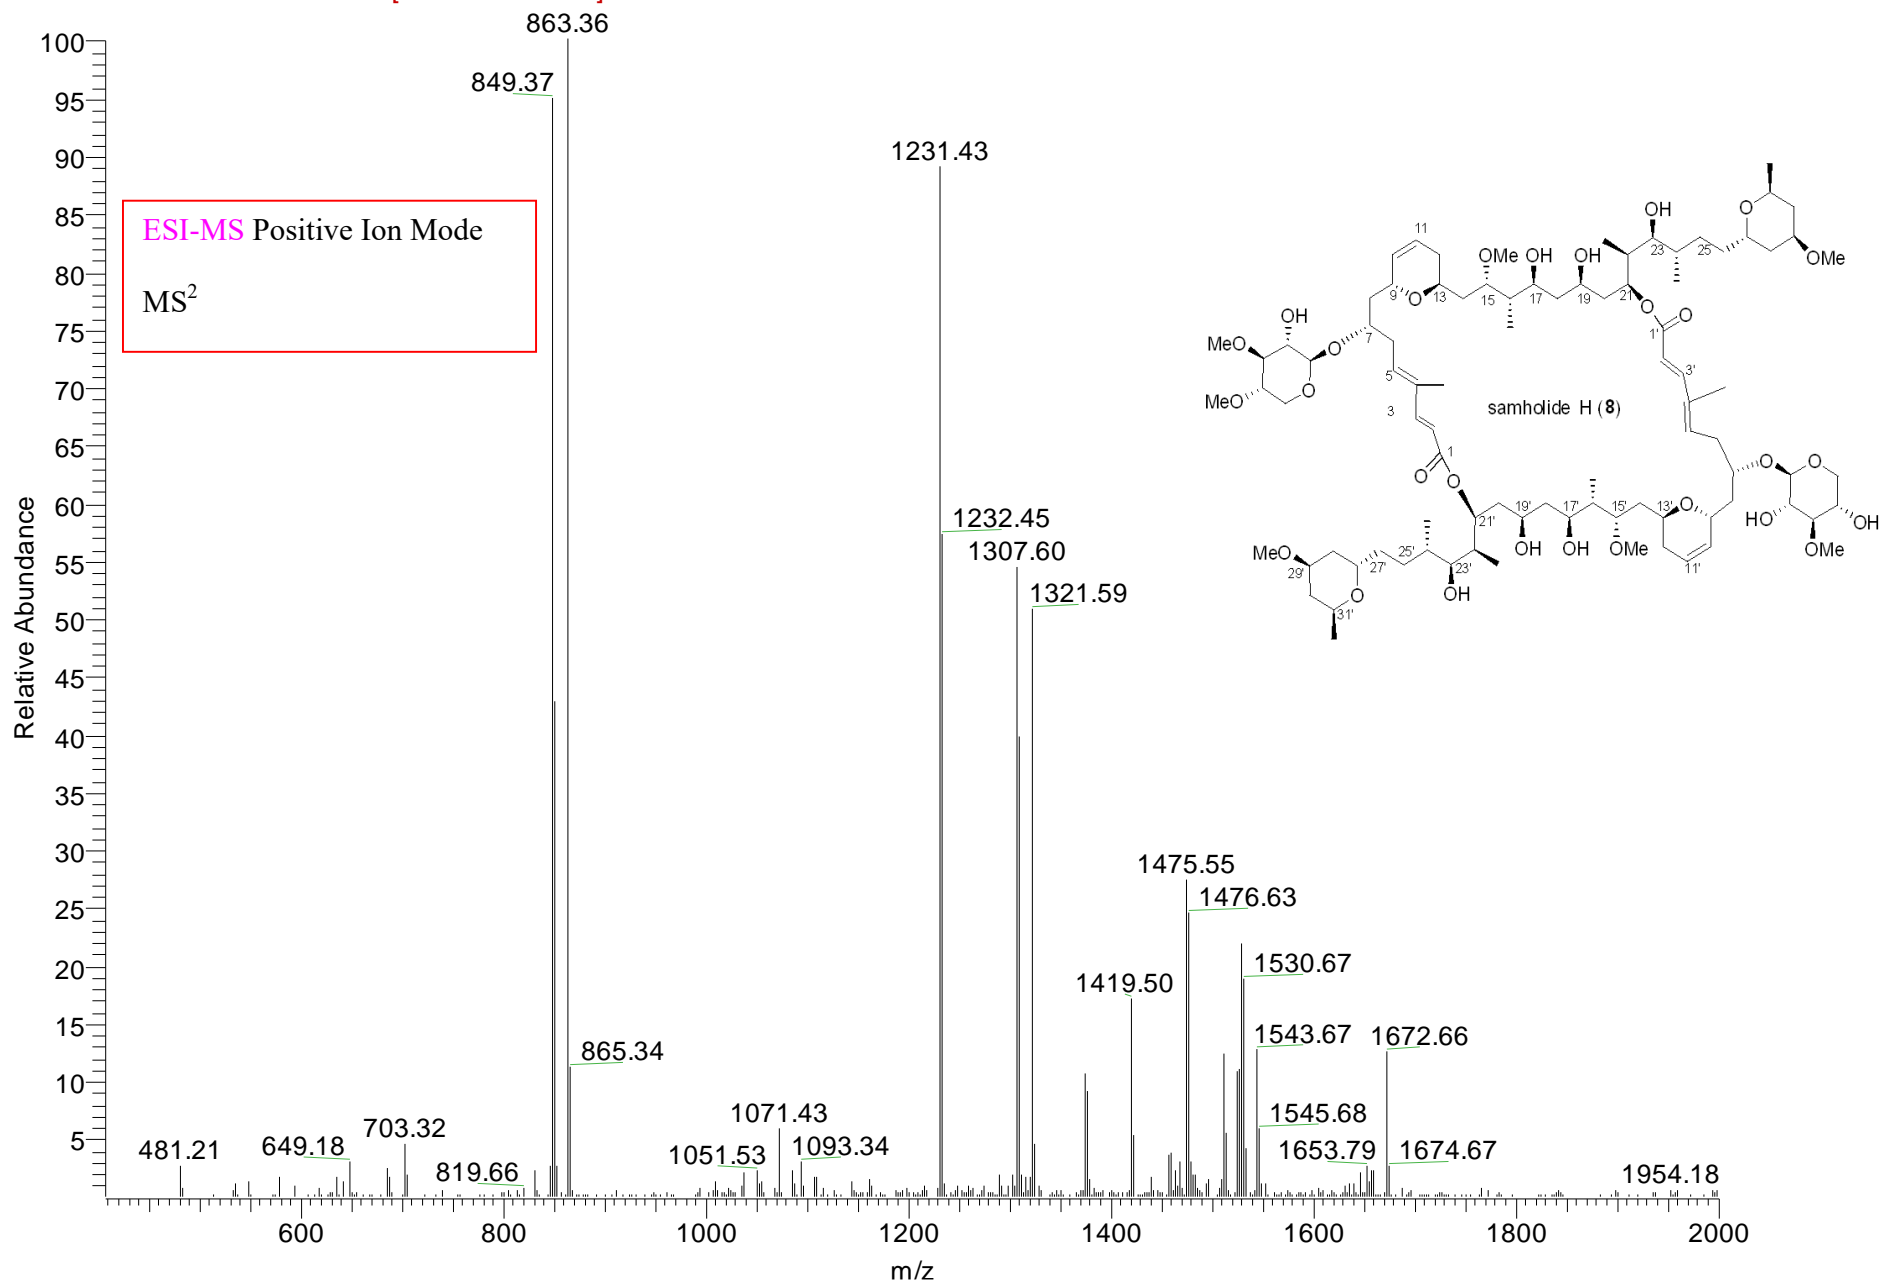Figure S82 The ESI MS<sup>2</sup> spectrum of samholide H (8)

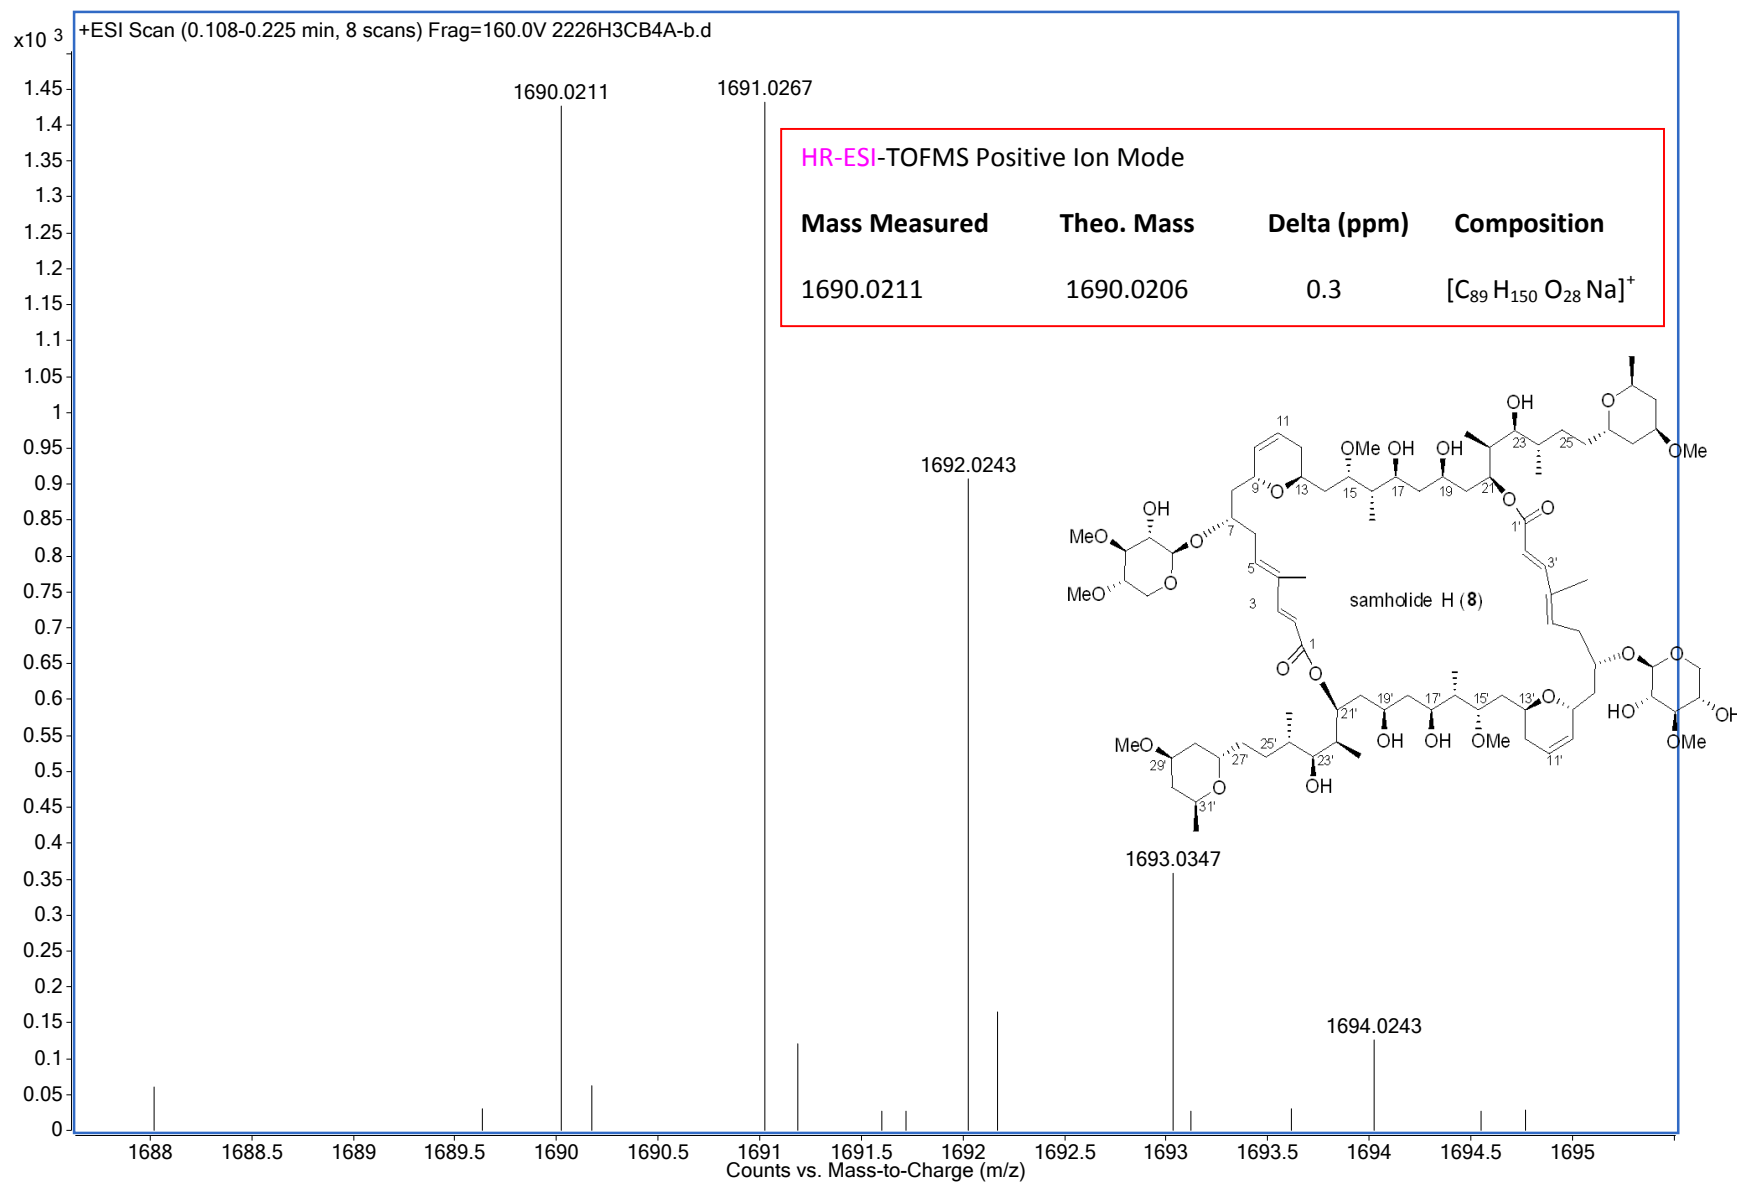

Figure S83 The positive HRESIMS spectrum of samholide H (8)

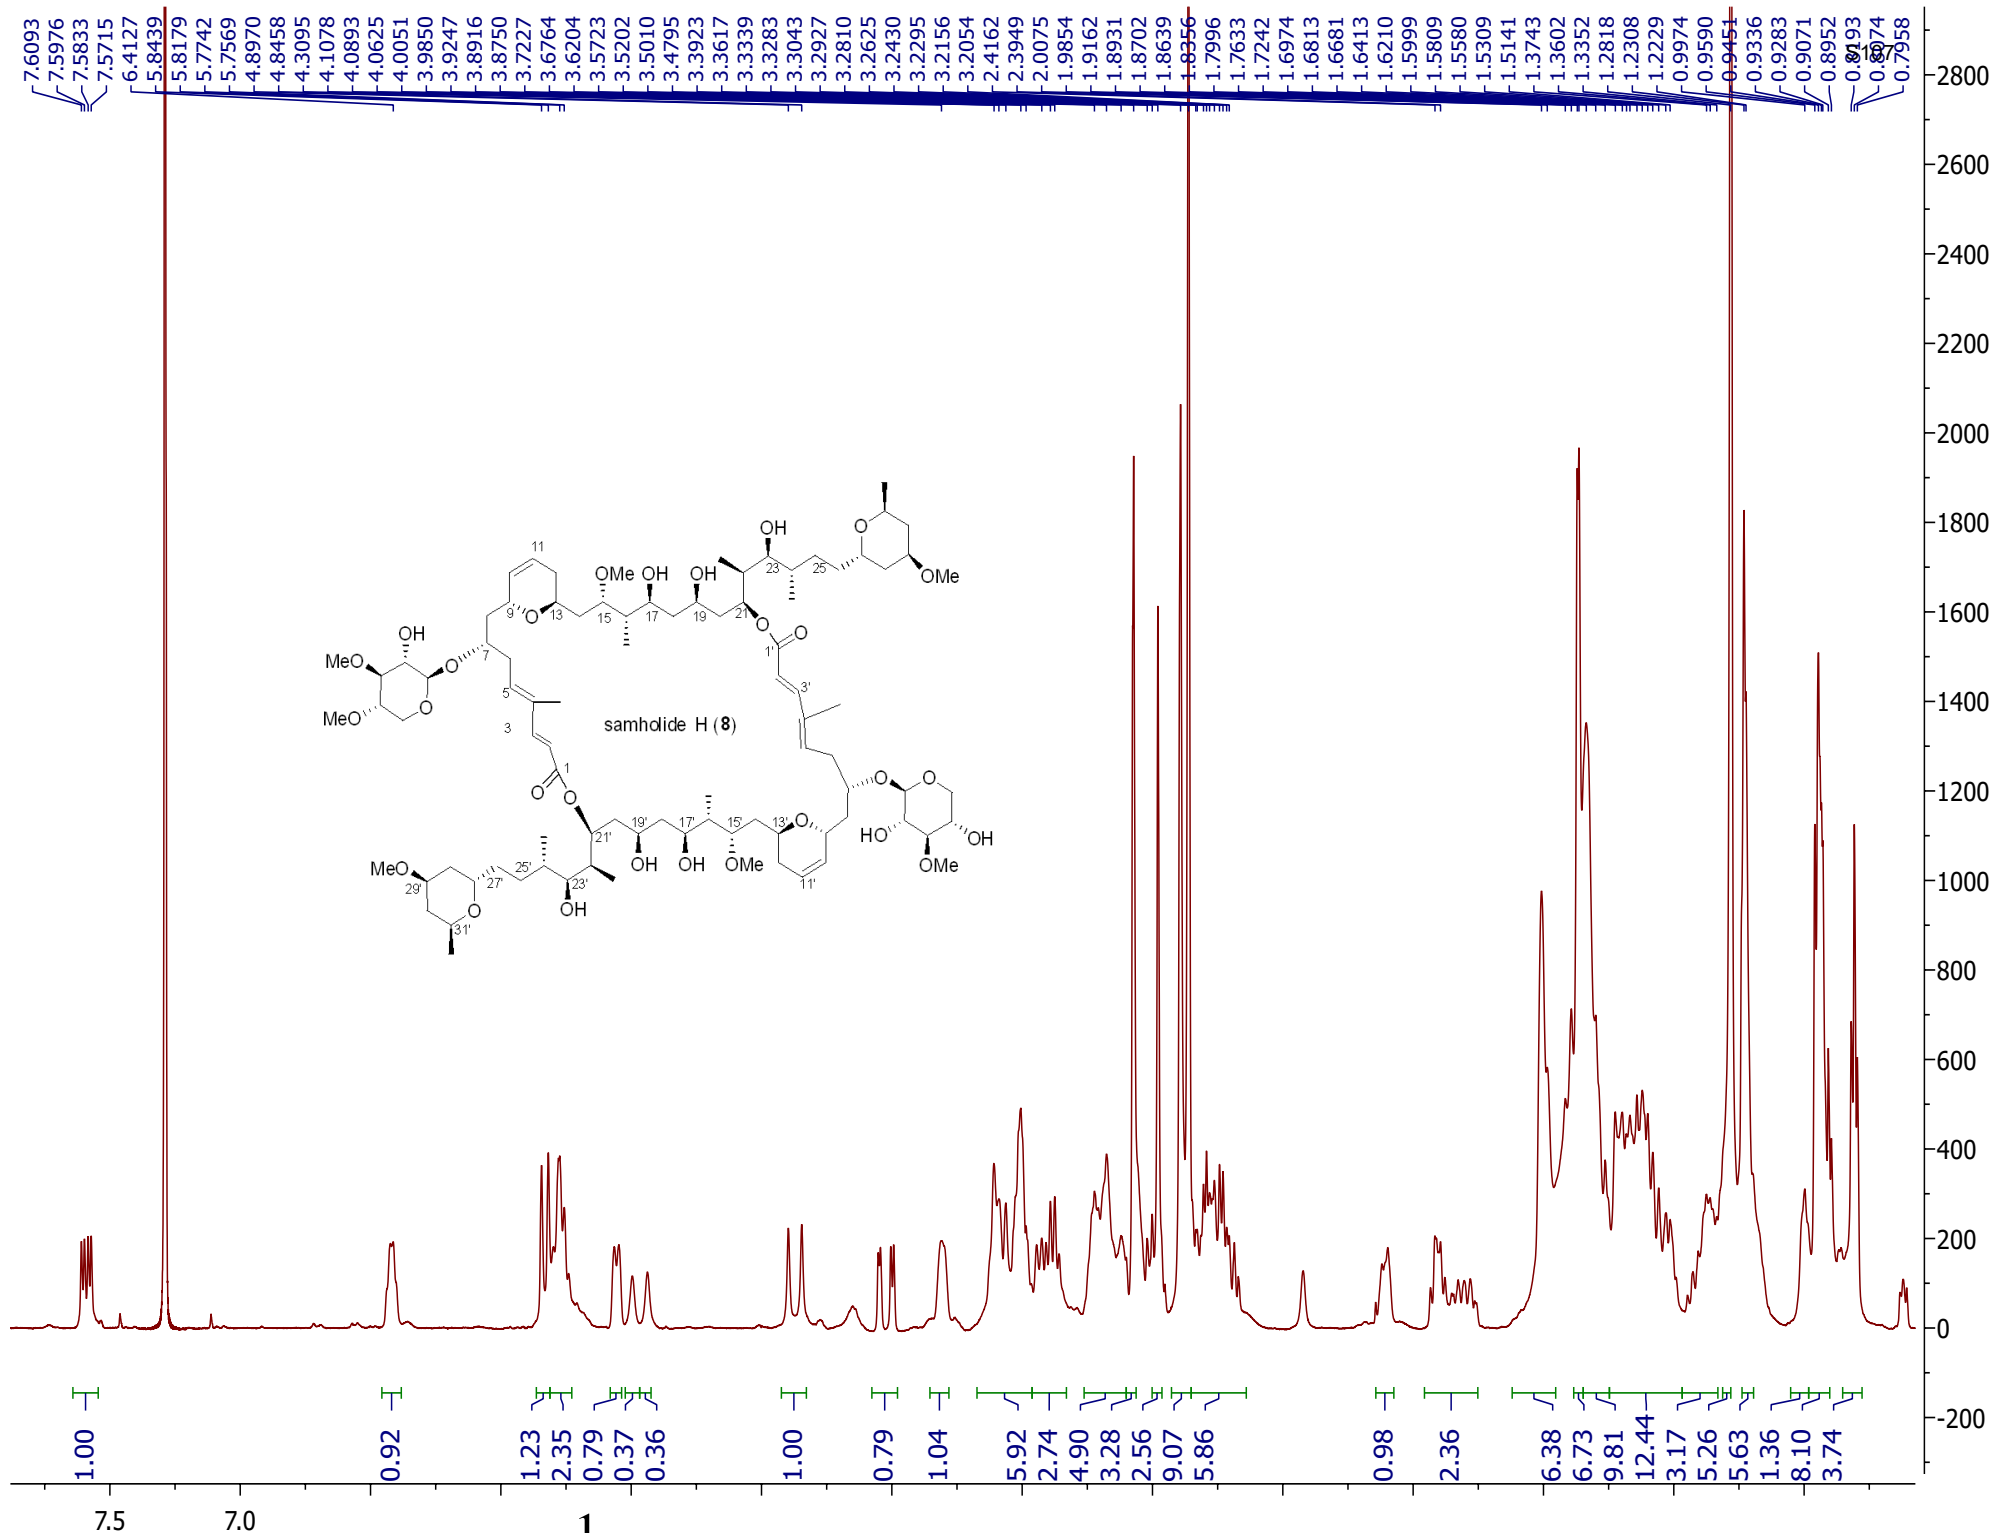

Figure S84  $^1\text{H}$  NMR (600 MHz, DMSO) spectrum of samholide H (**8**)

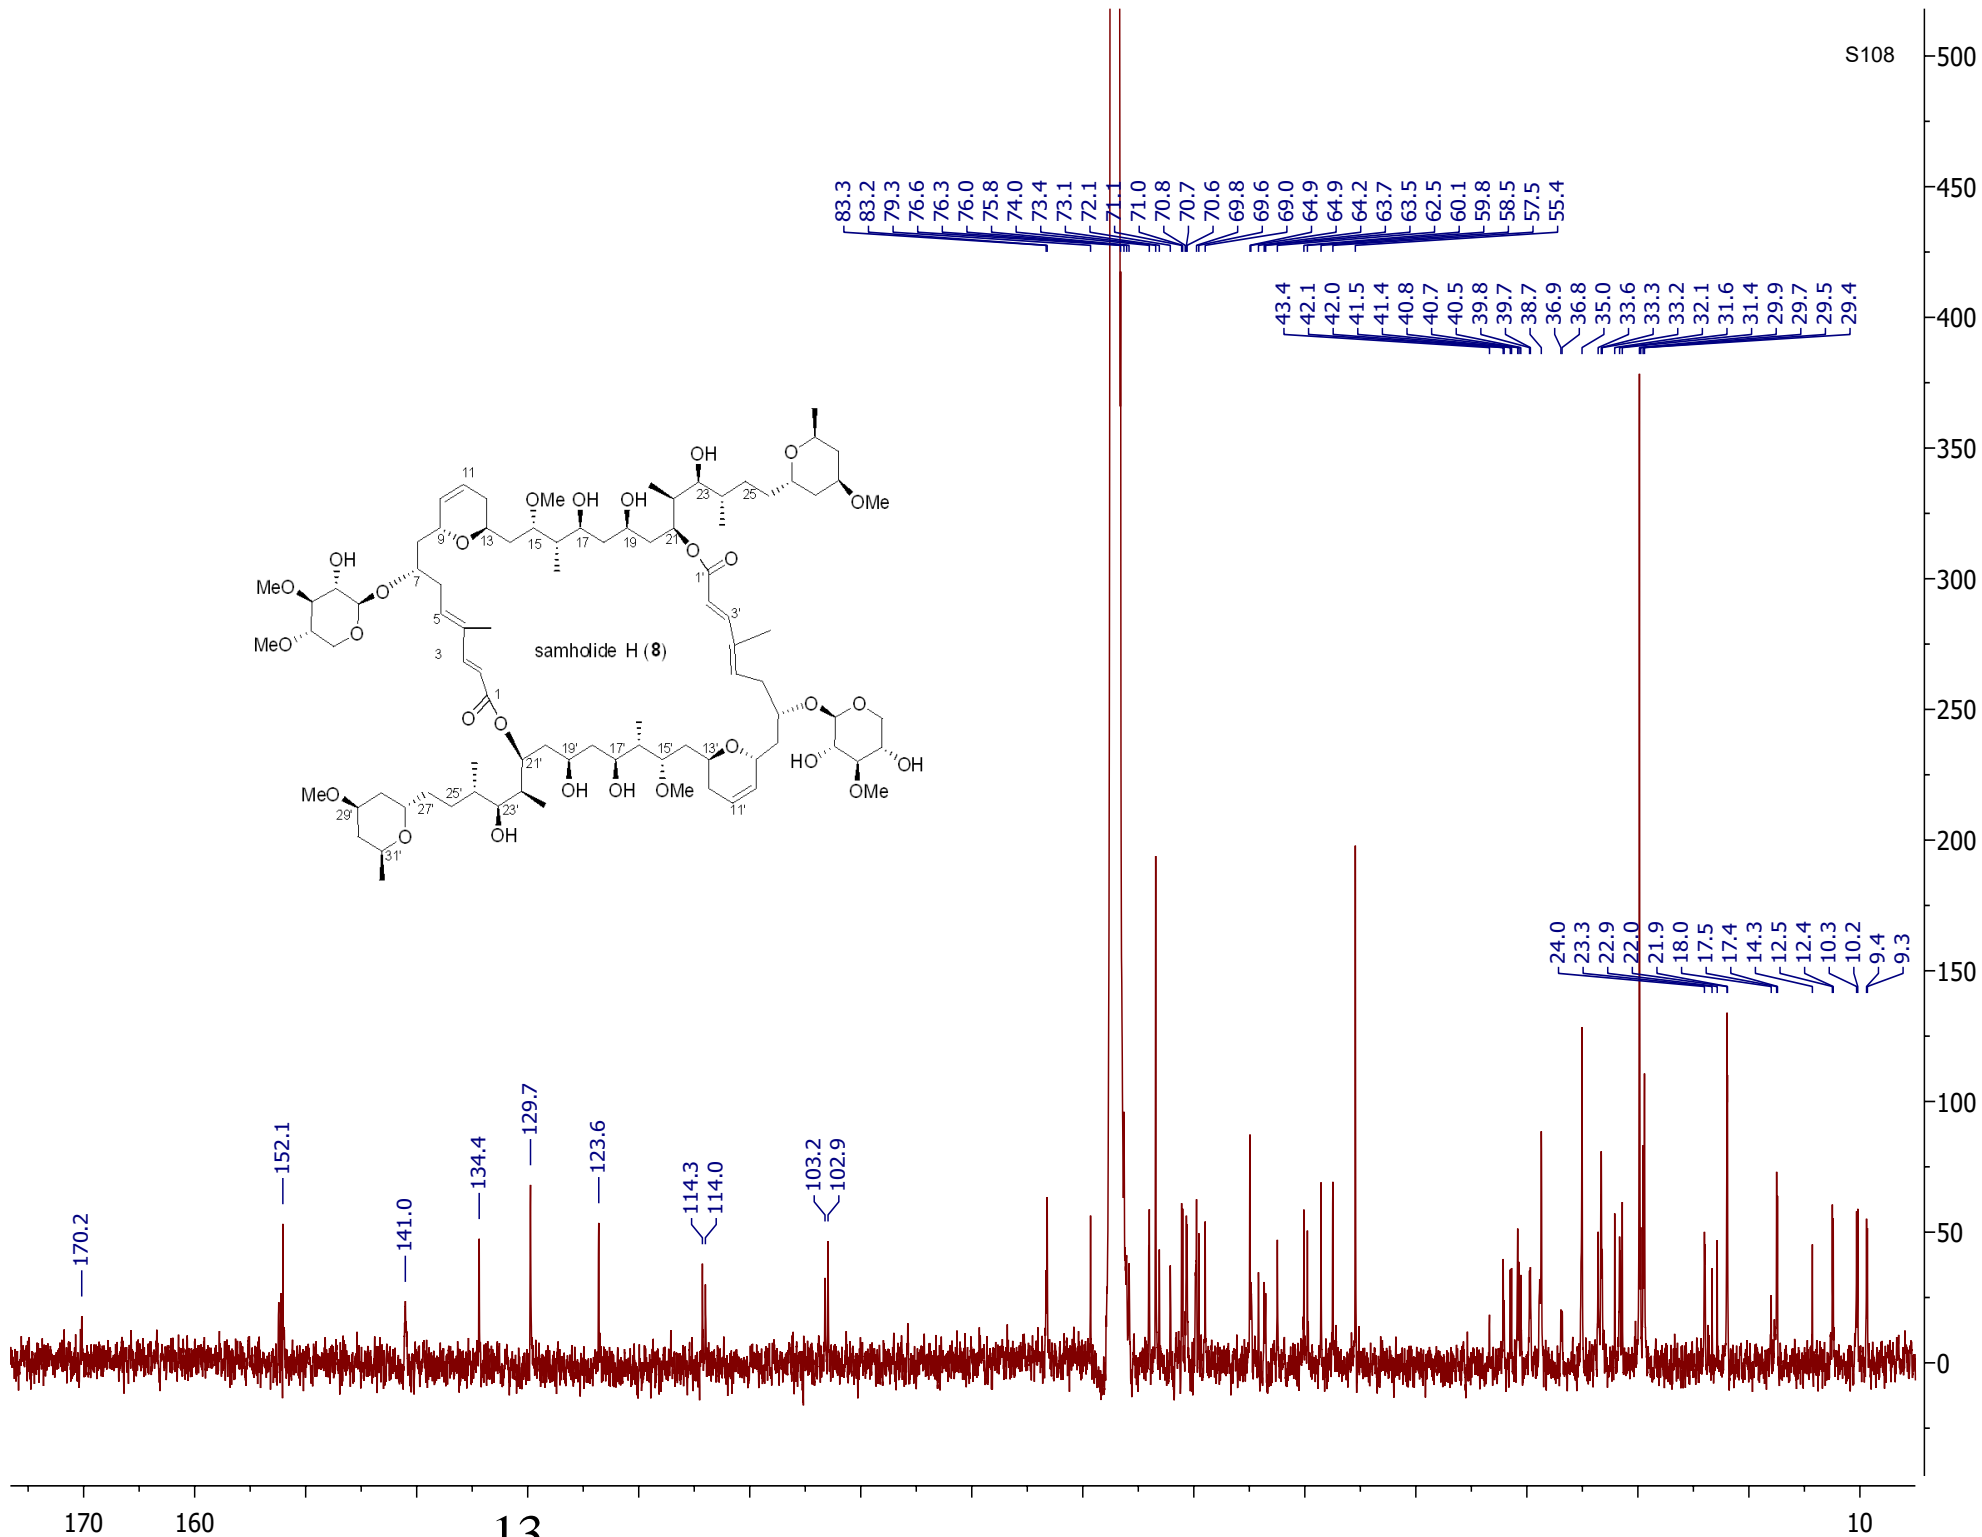

Figure S85  $^{13}\text{C}$  NMR (150 MHz, DMSO) spectrum of samholide H (8)

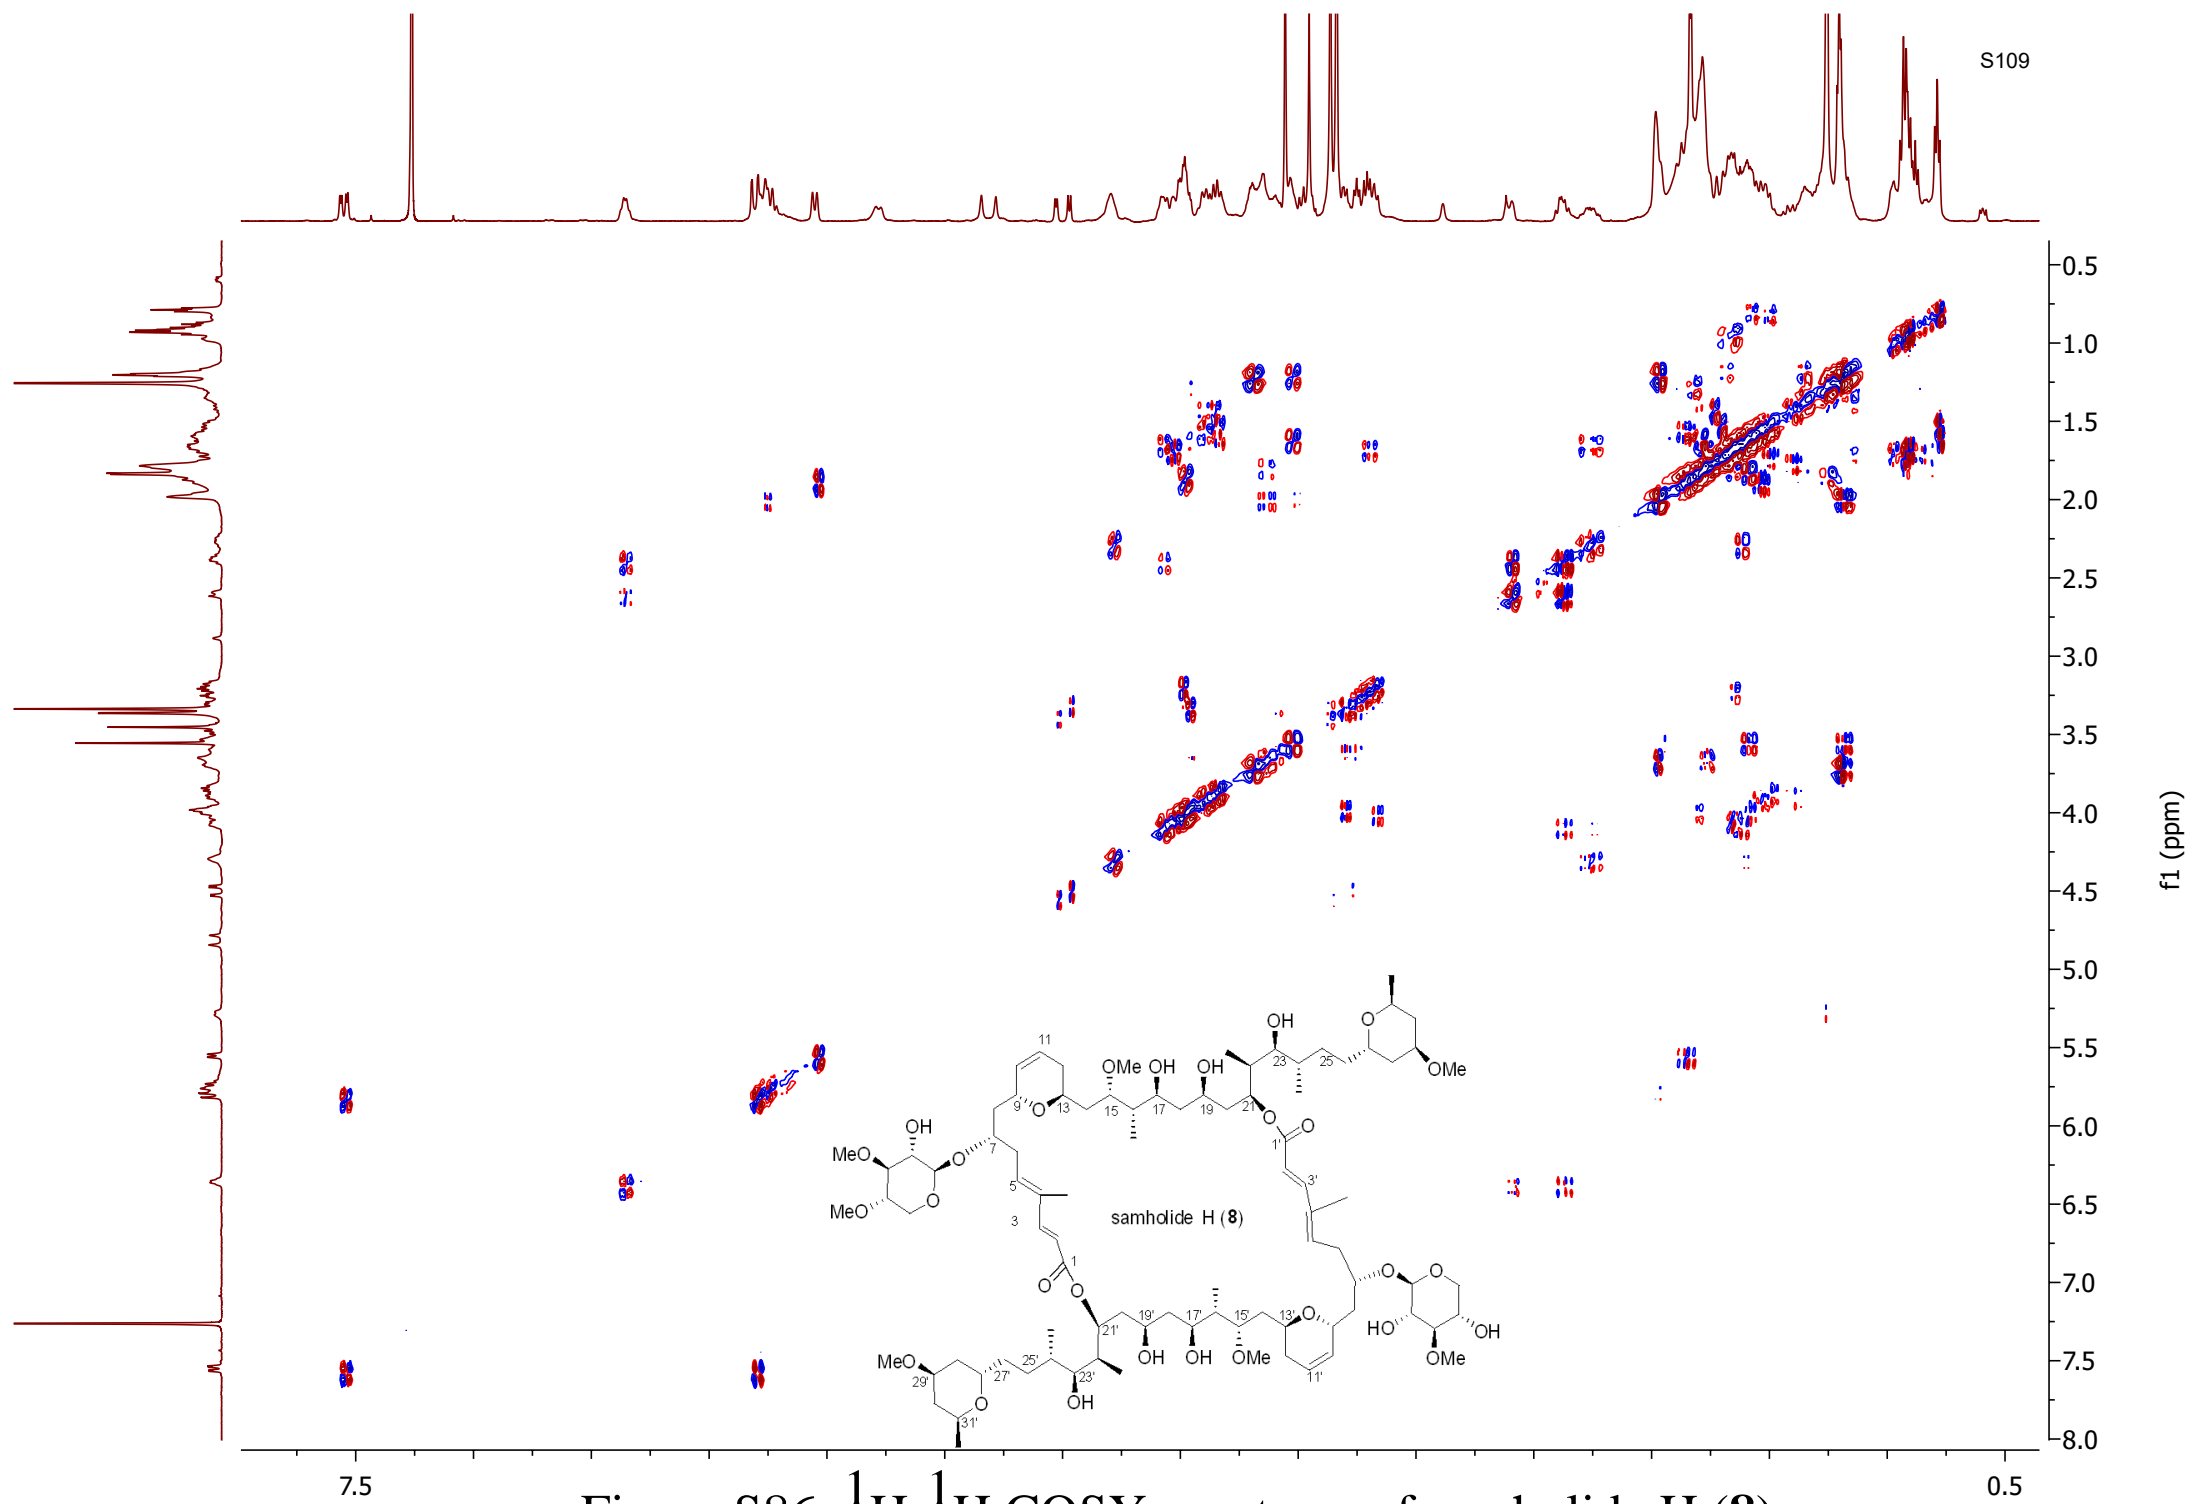

Figure S86  $^1\text{H}$ - $^1\text{H}$  COSY spectrum of samholide H (8)

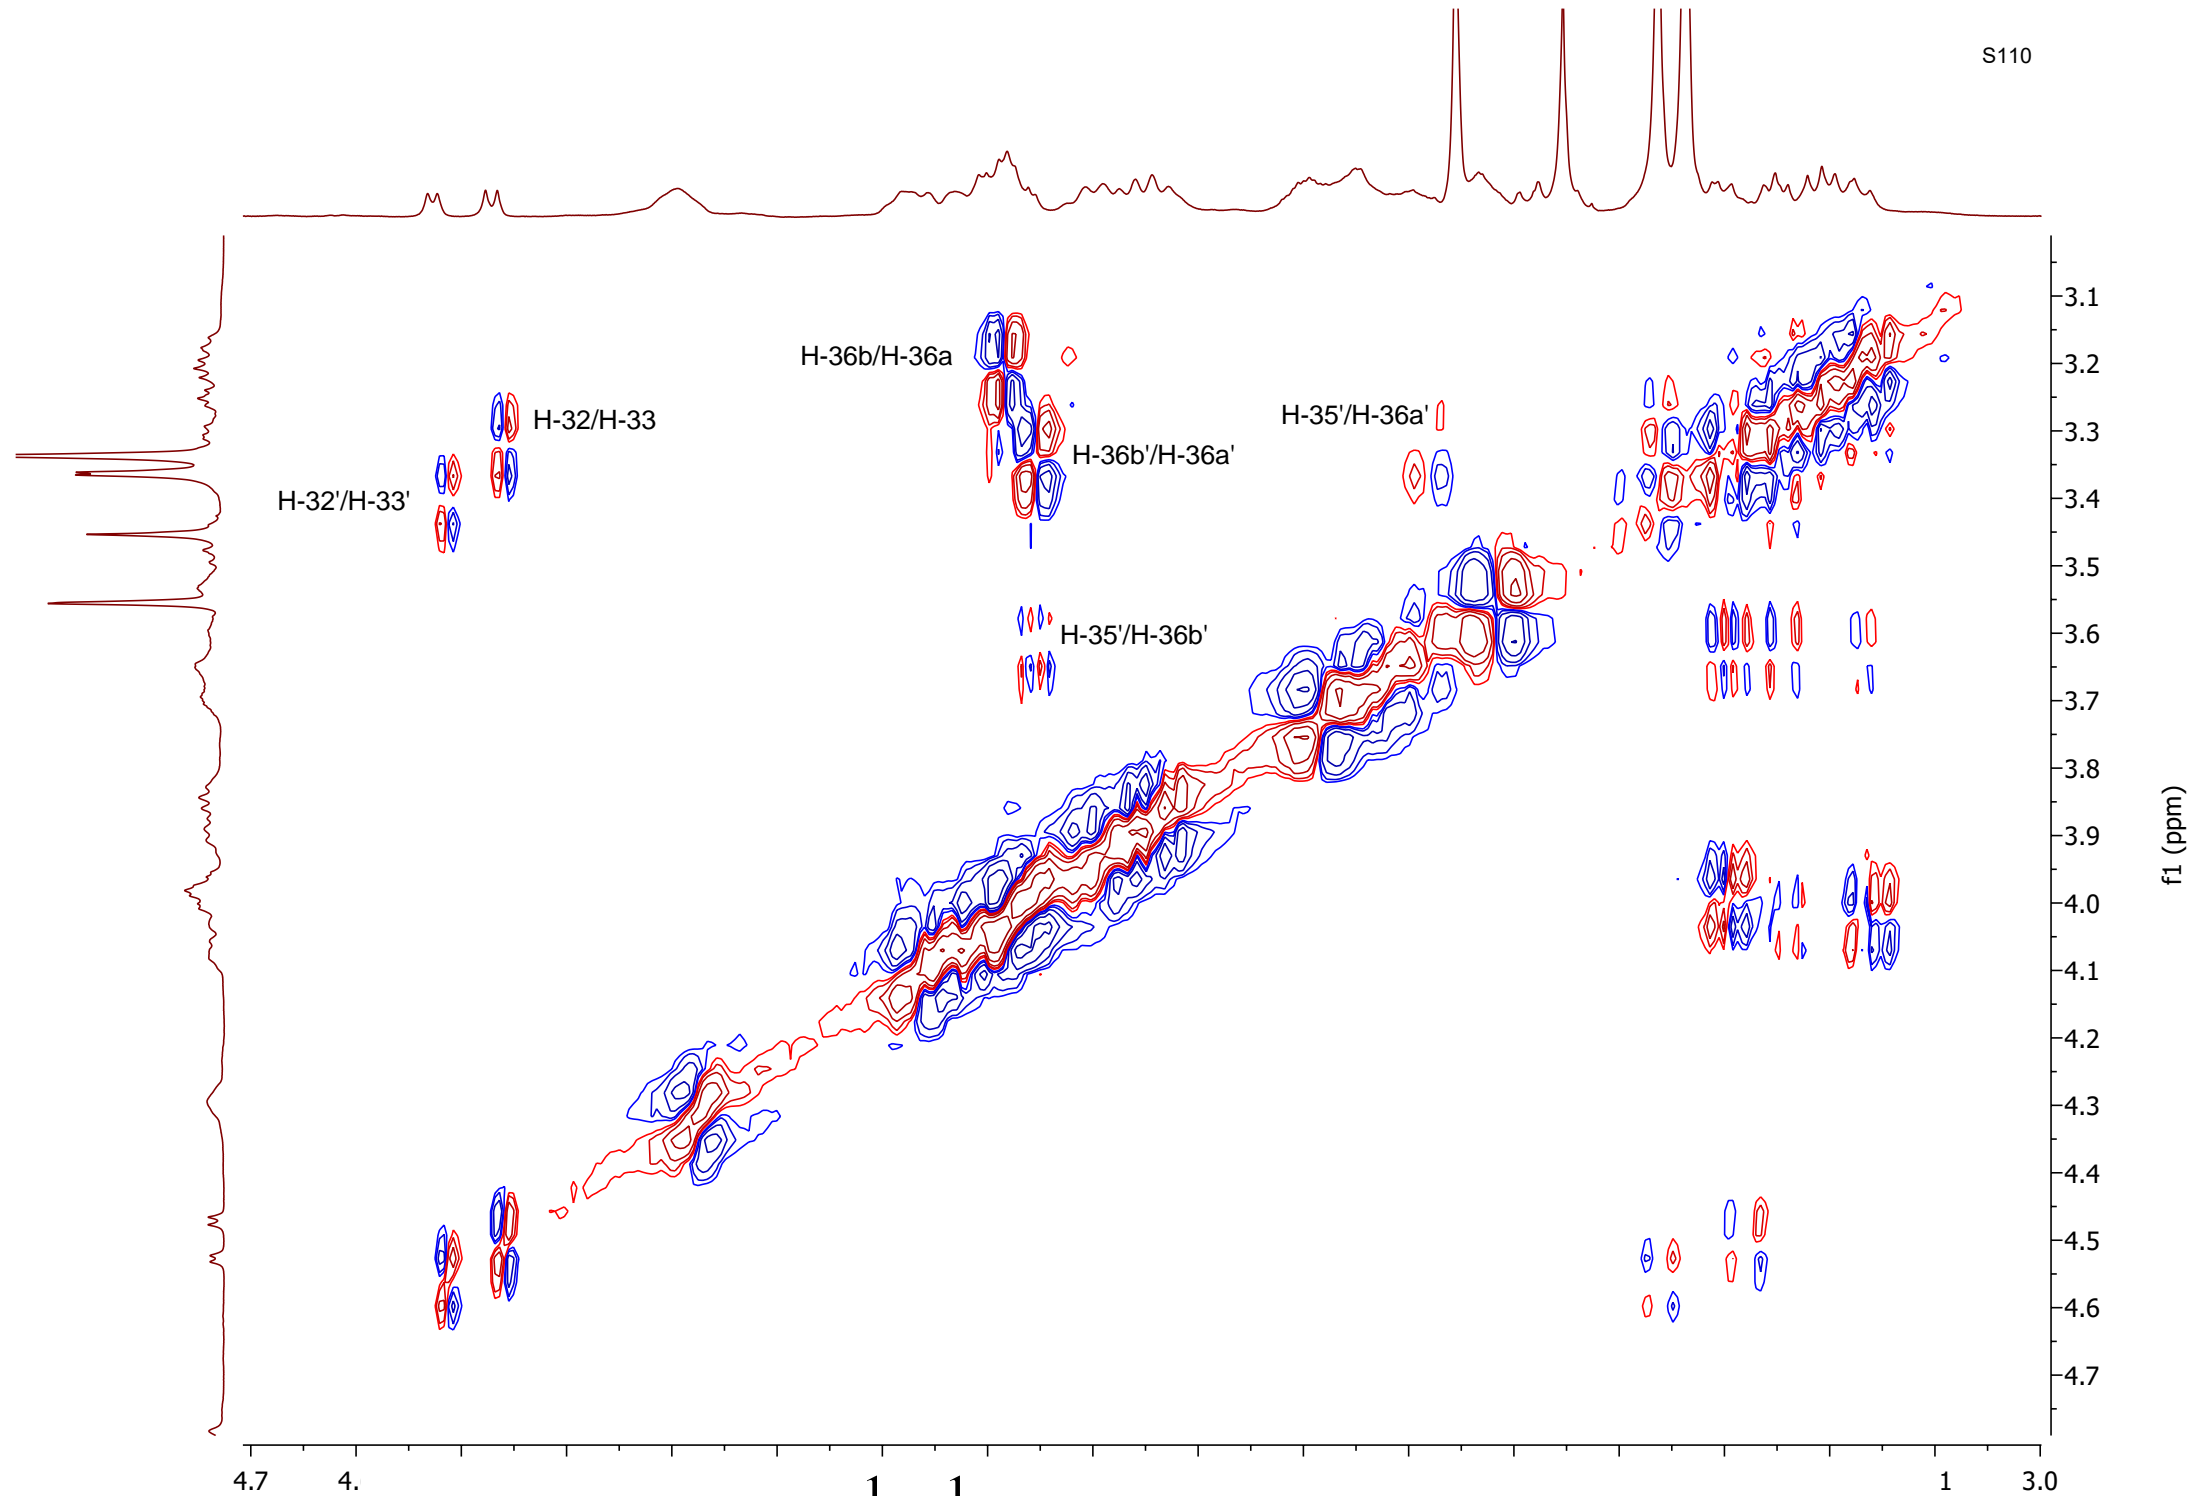

Figure S87 Amplified  $^1\text{H}$ - $^1\text{H}$  COSY spectrum of samholide H (**8**)

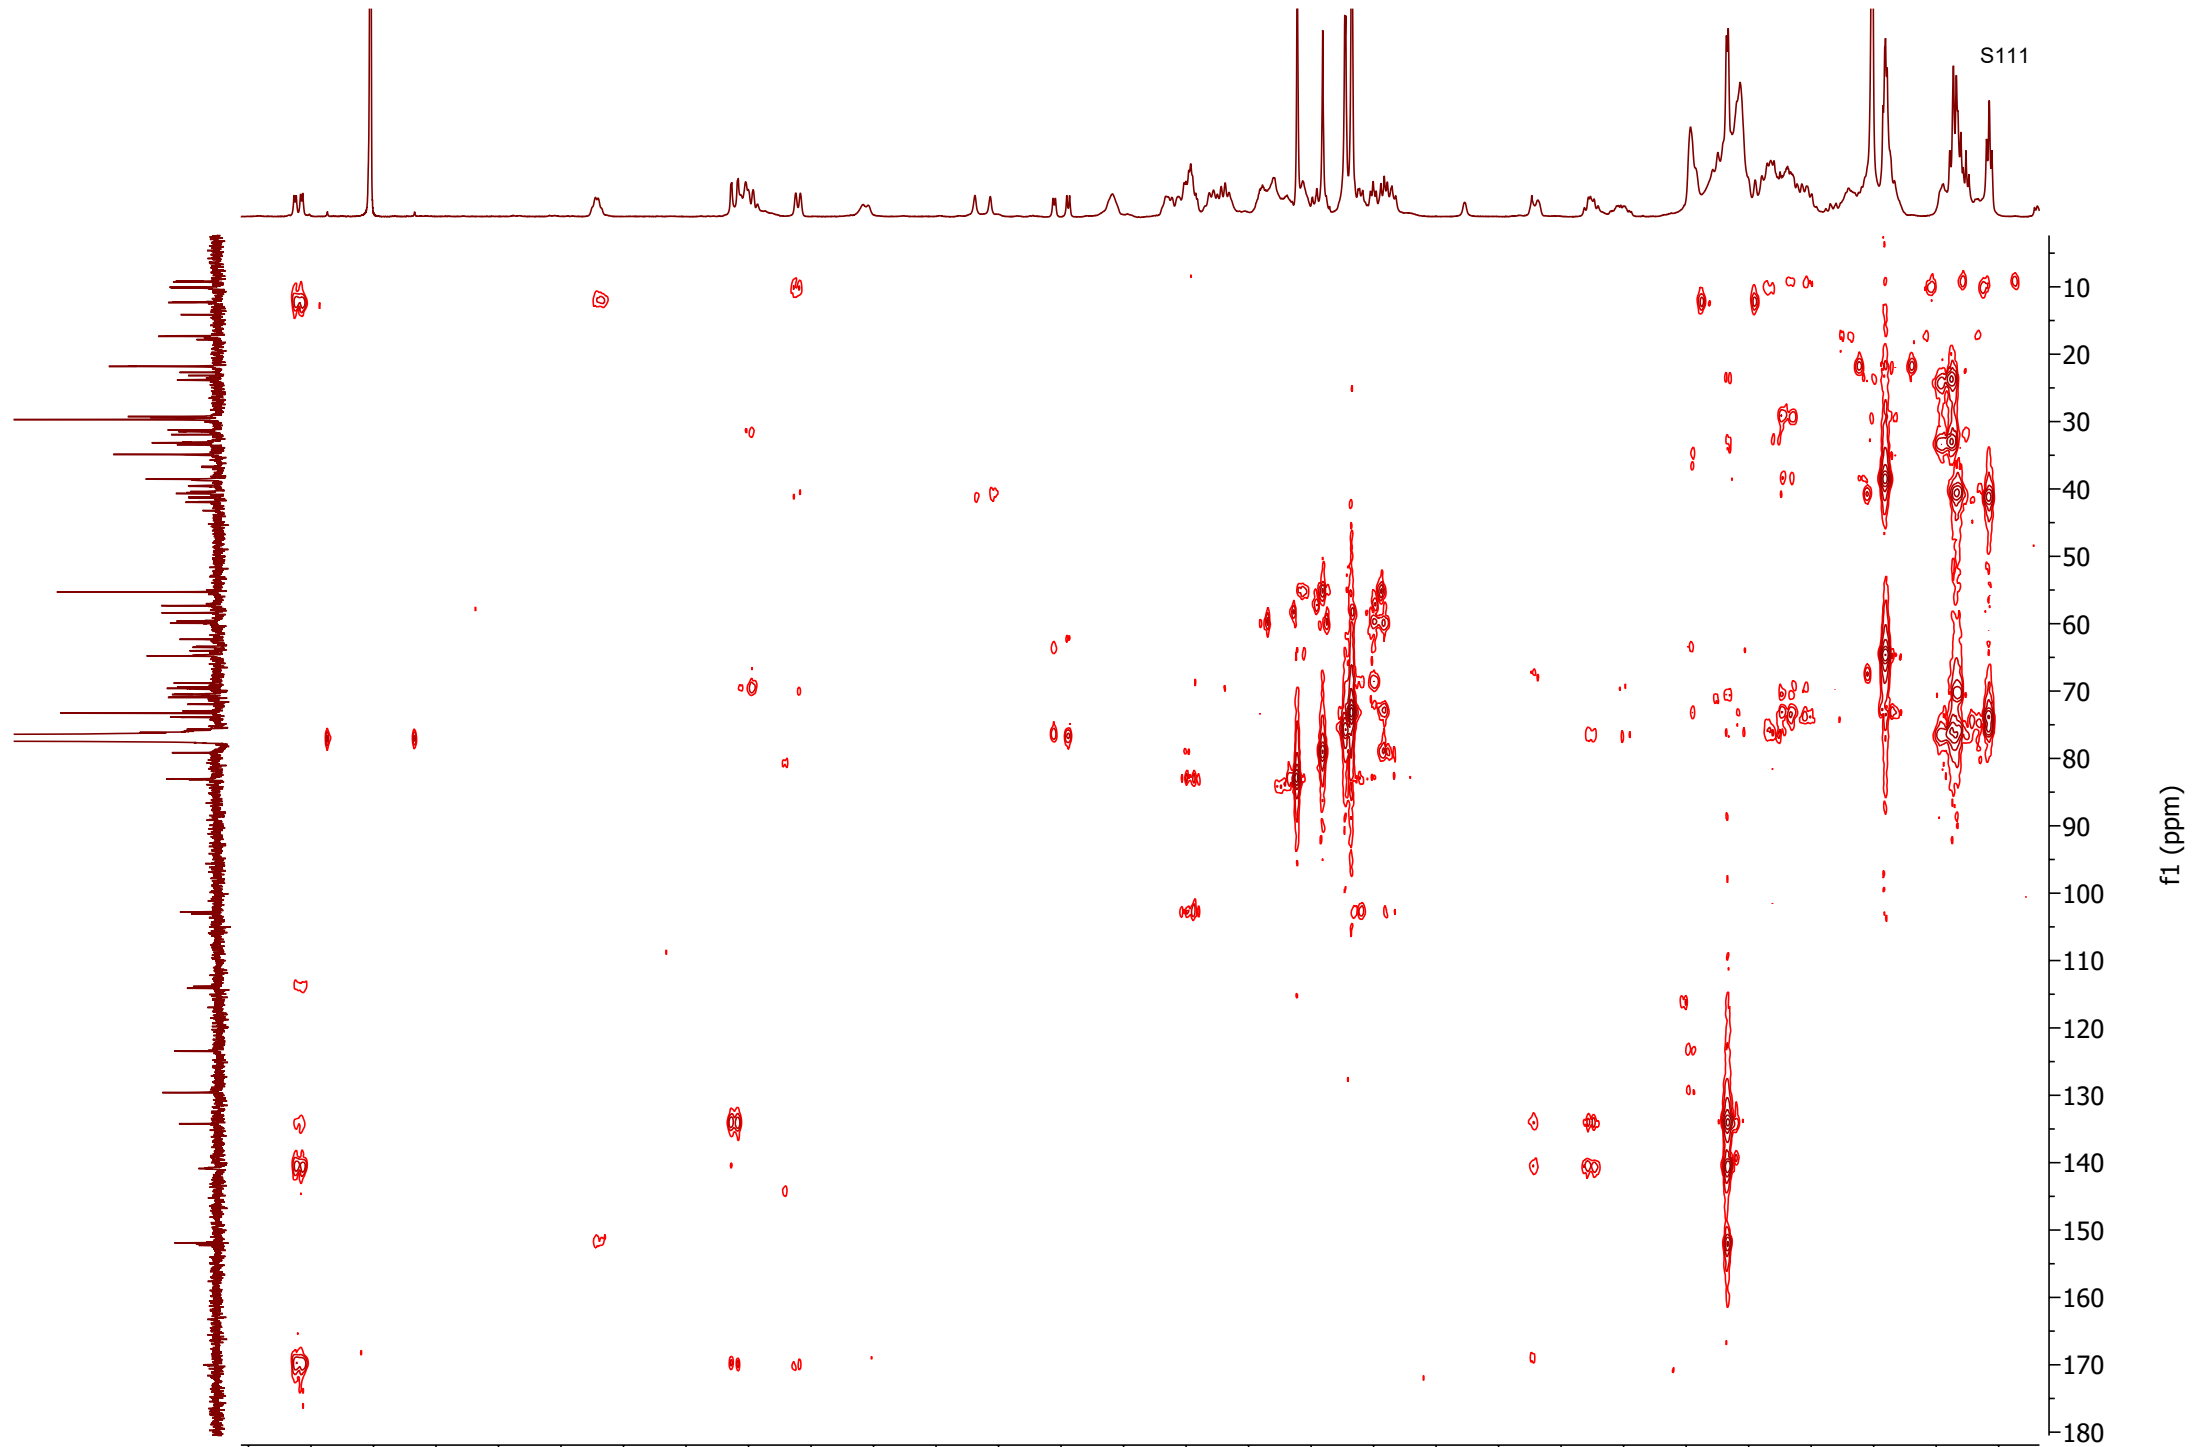

Figure S88 HMBC spectrum of samholide H (**8**)

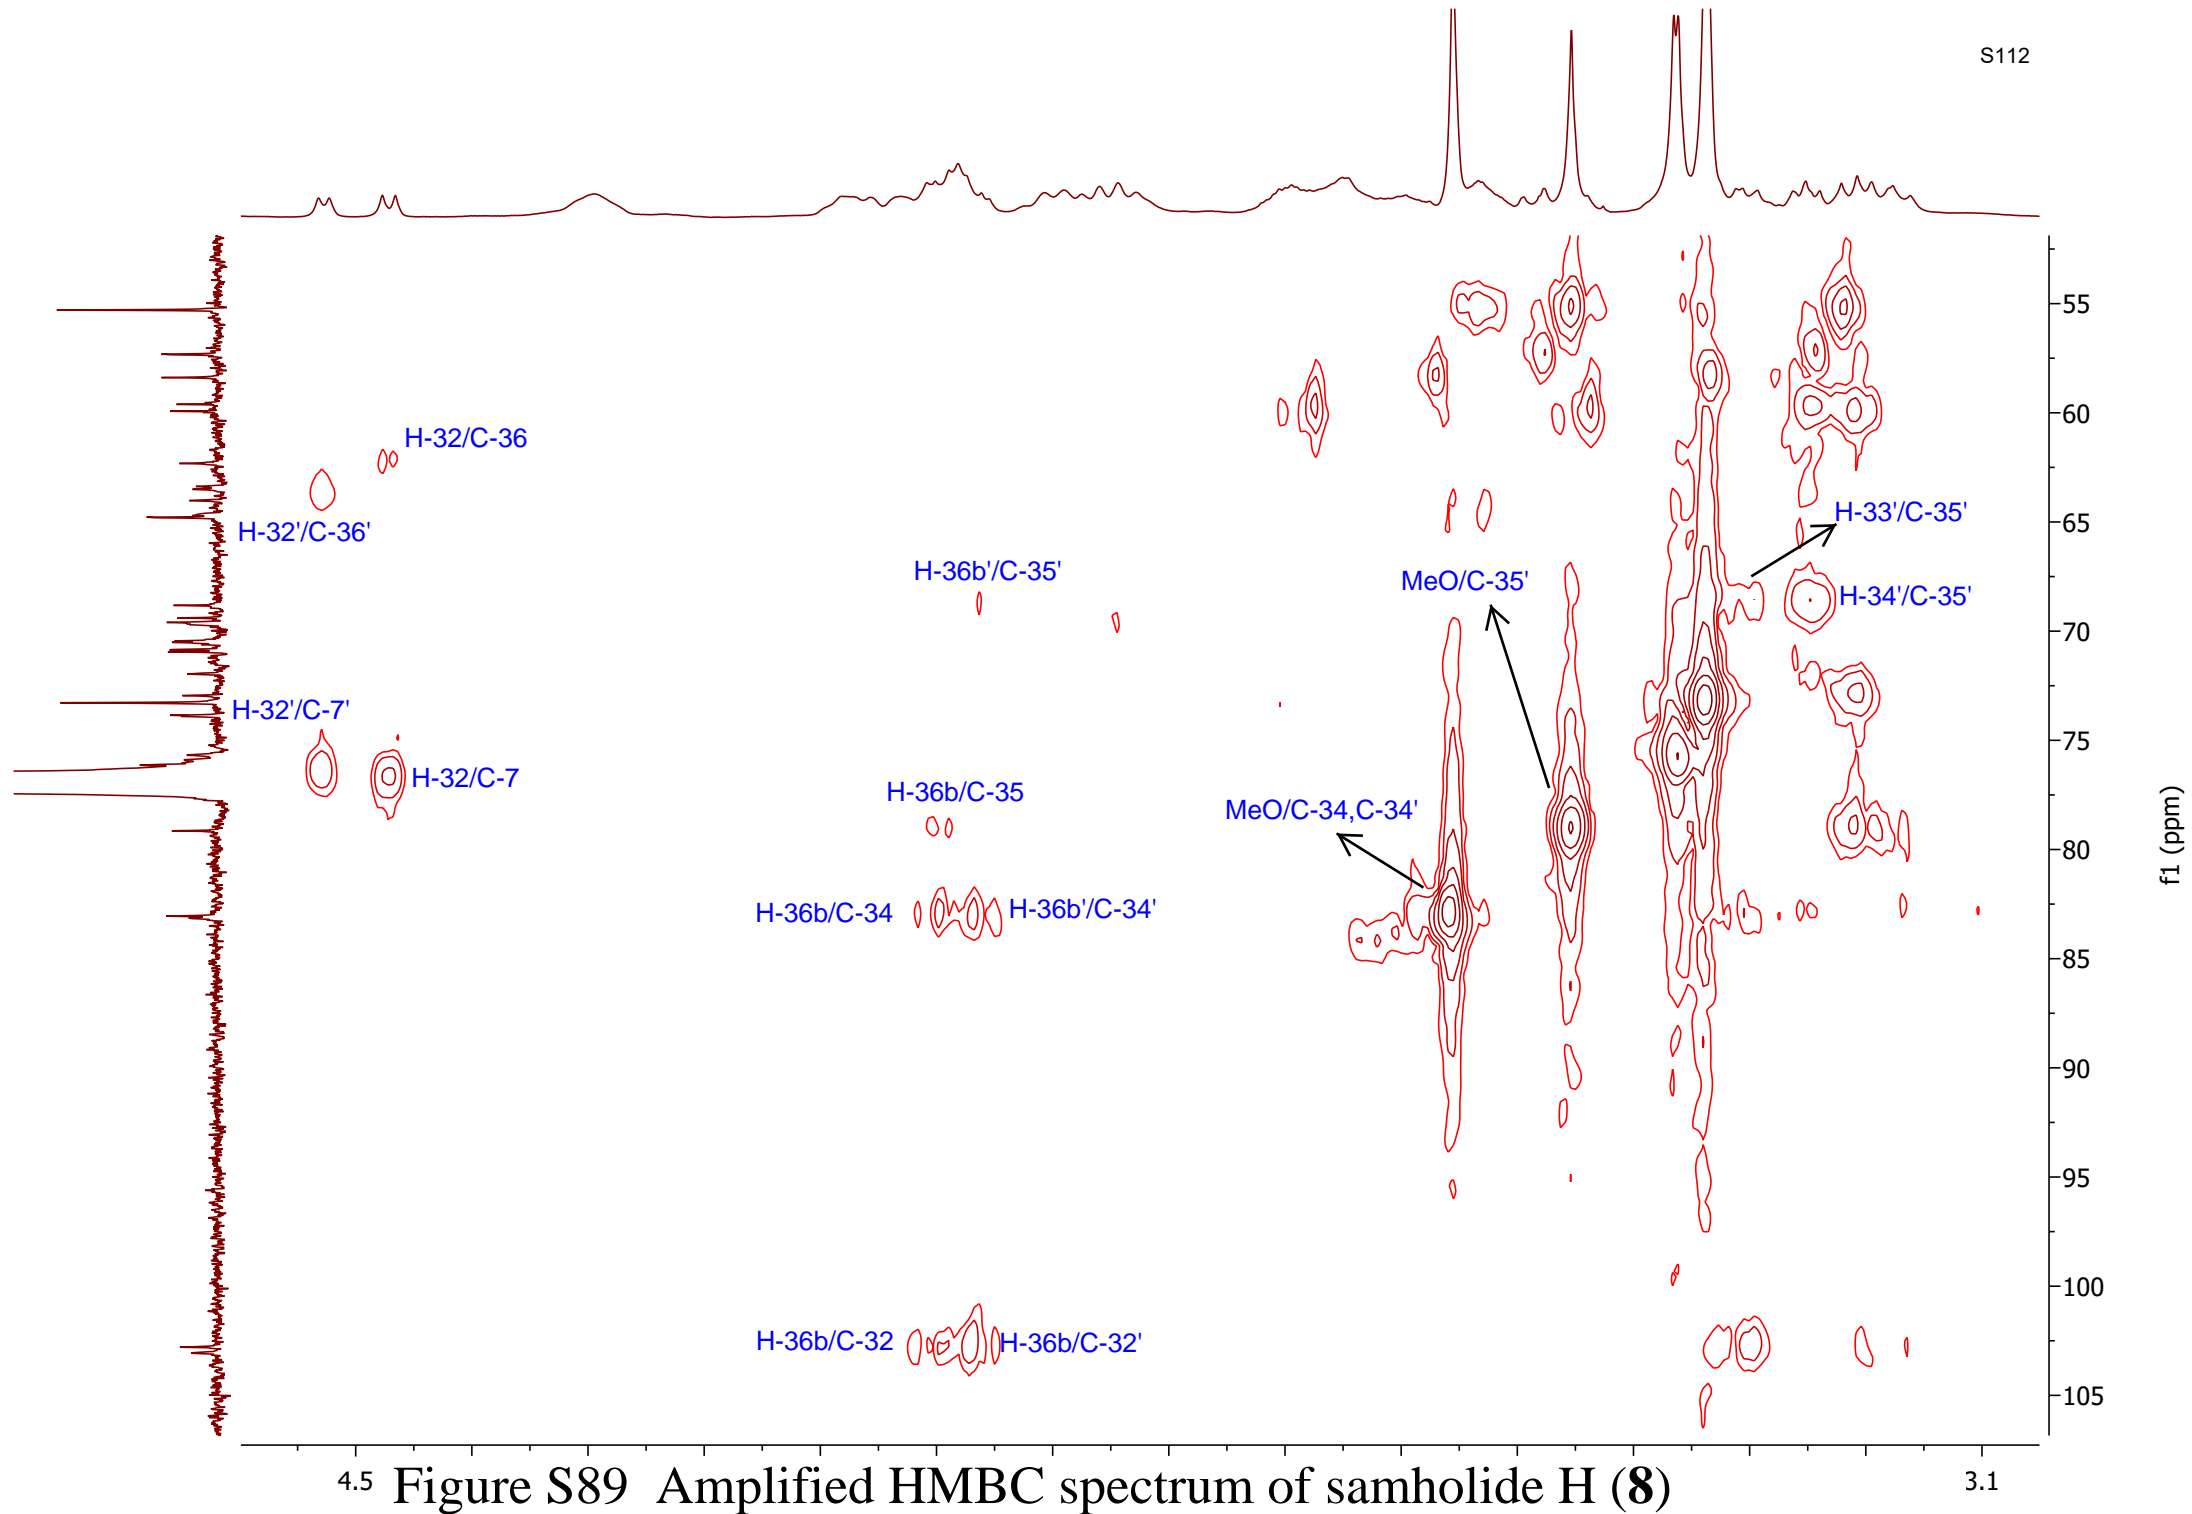

4.5 Figure S89 Amplified HMBC spectrum of samholide H (8)



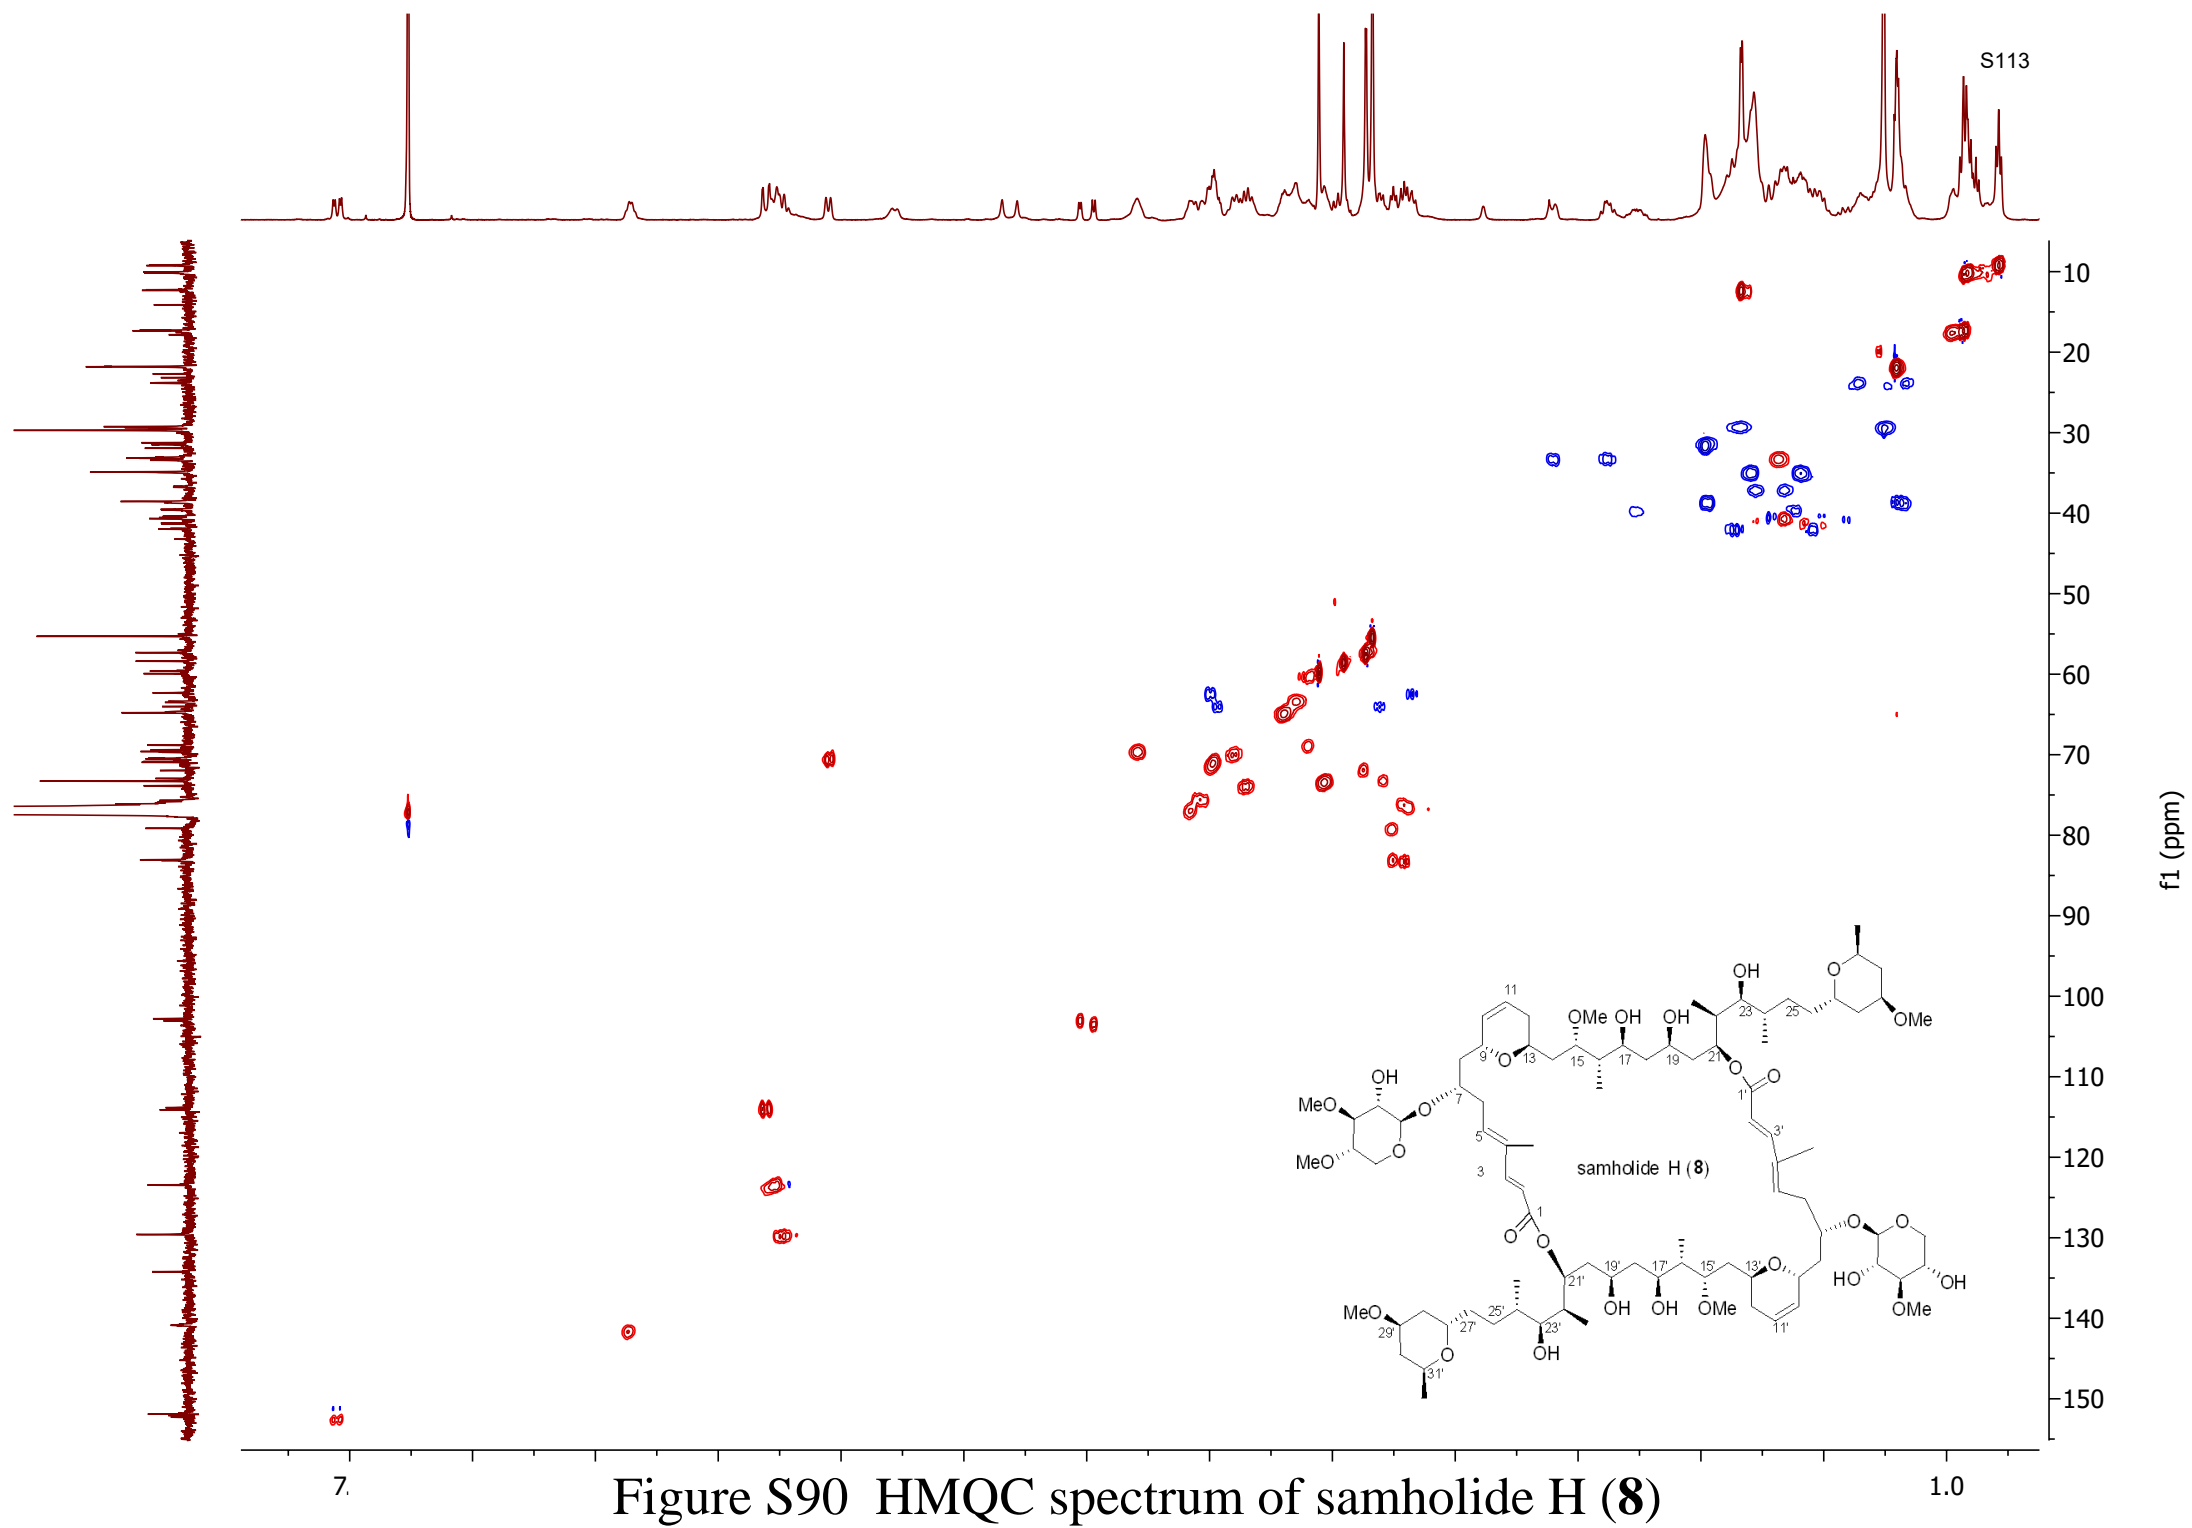

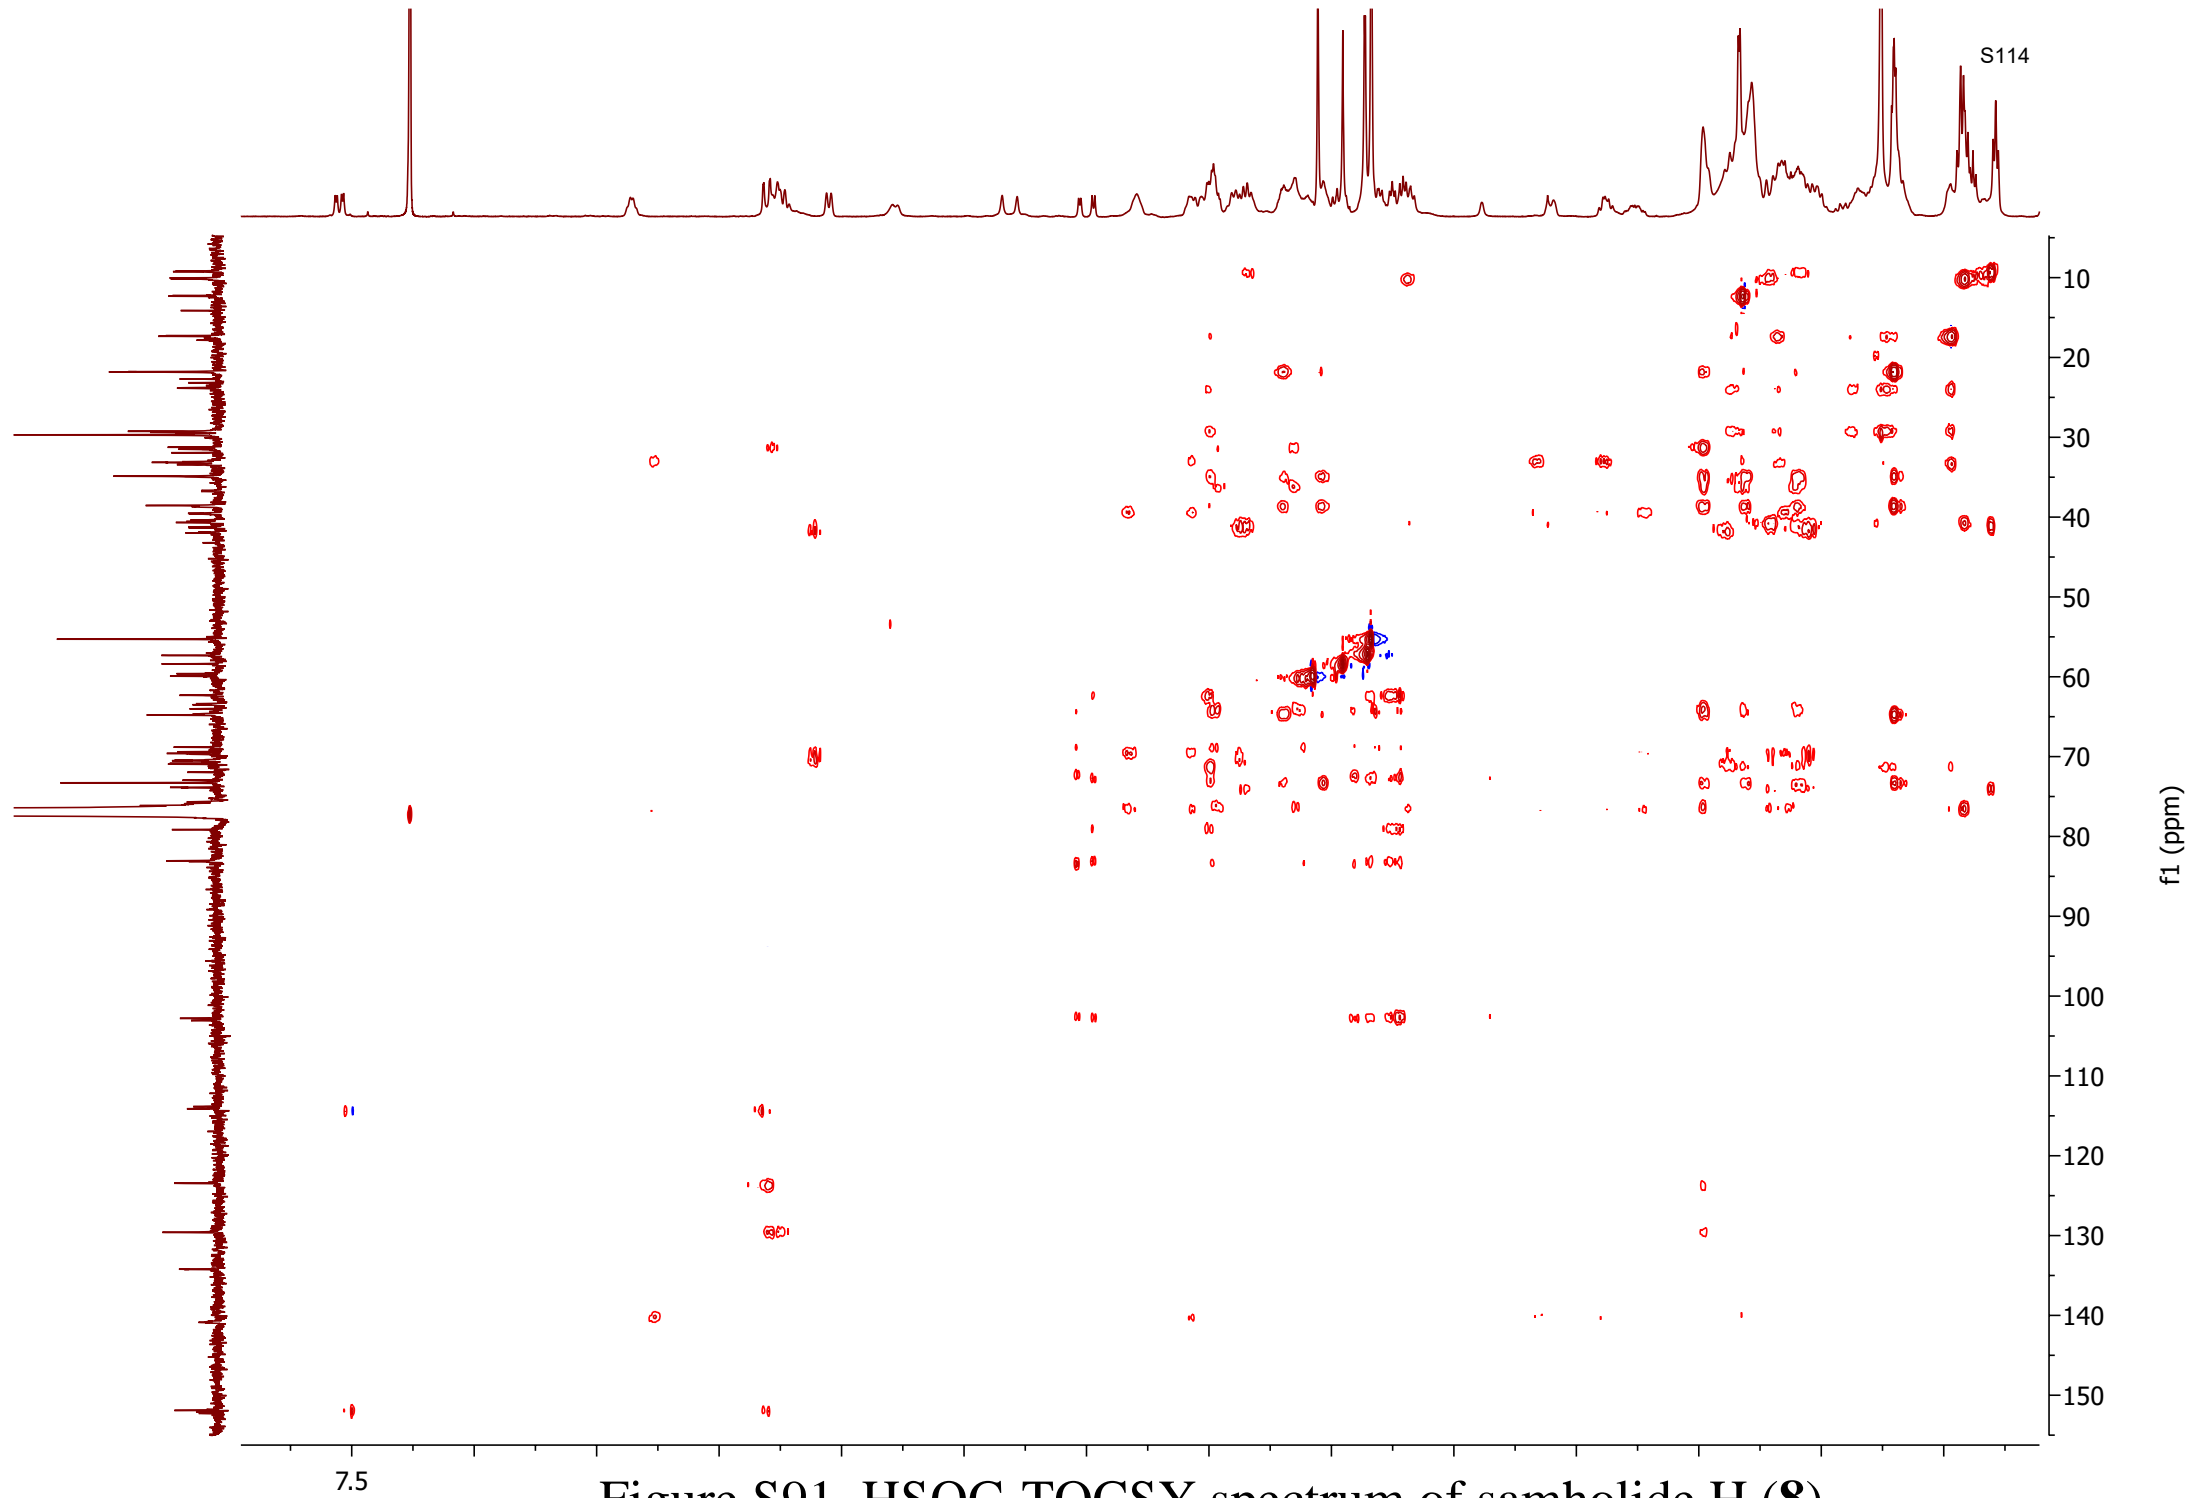

Figure S91 HSQC-TOCSY spectrum of samholide H (**8**)

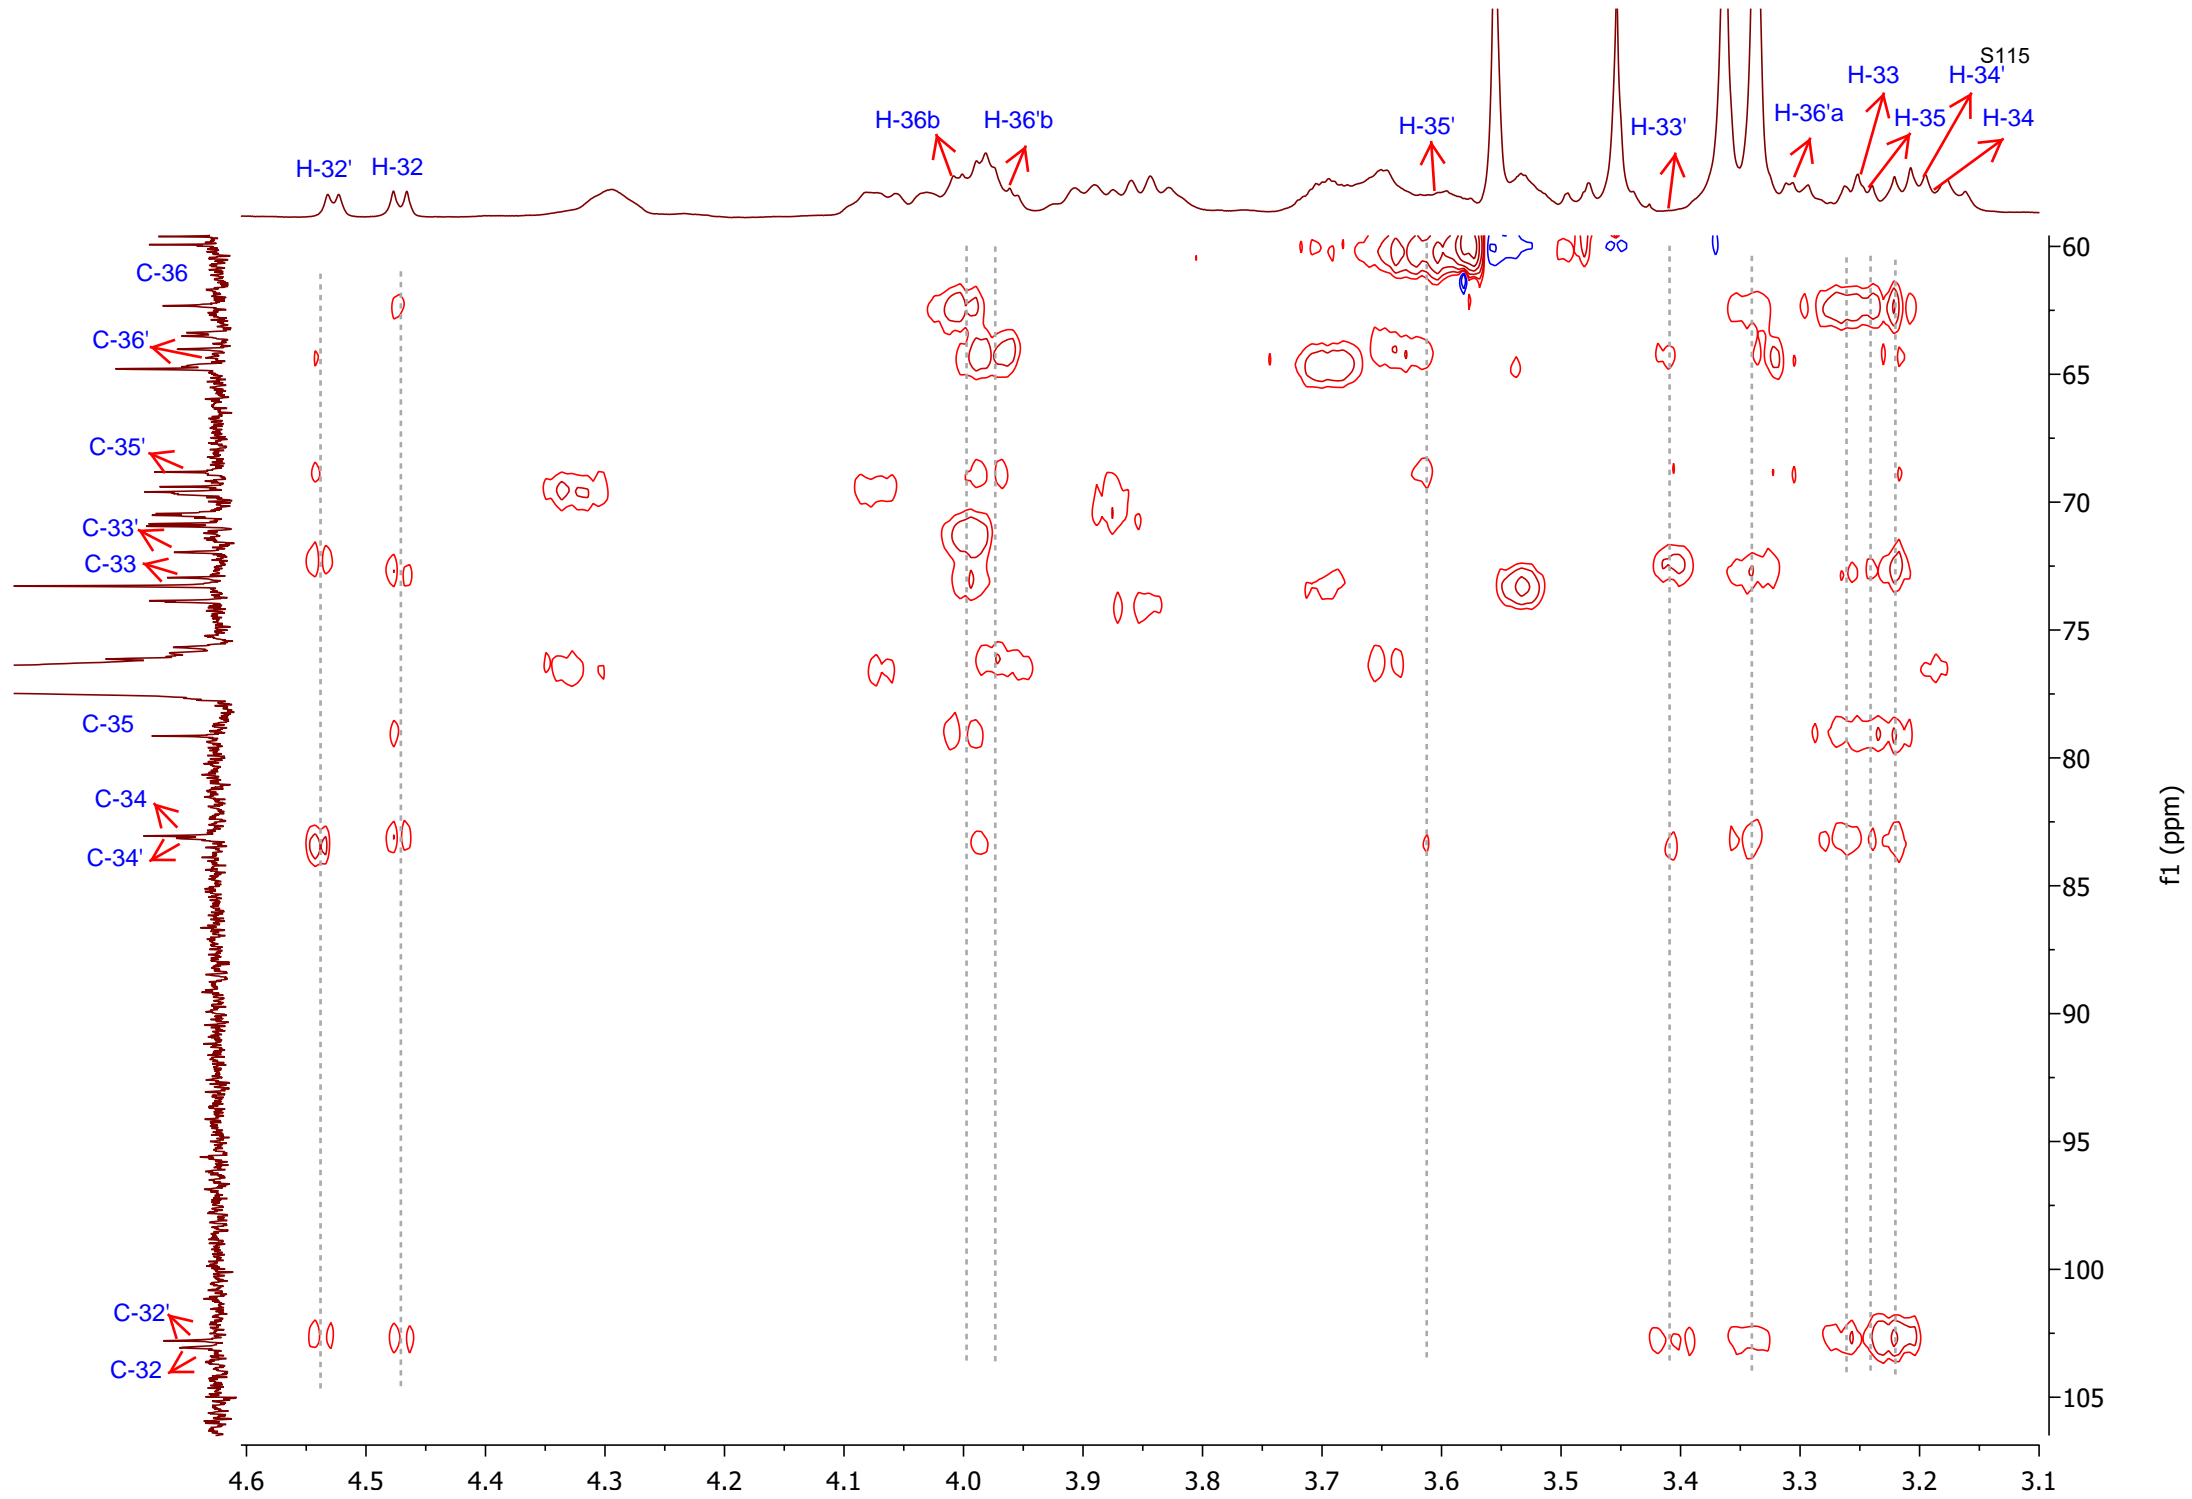

Figure S92 Amplified HSQC-TOCSY spectrum of samholide H (**8**)

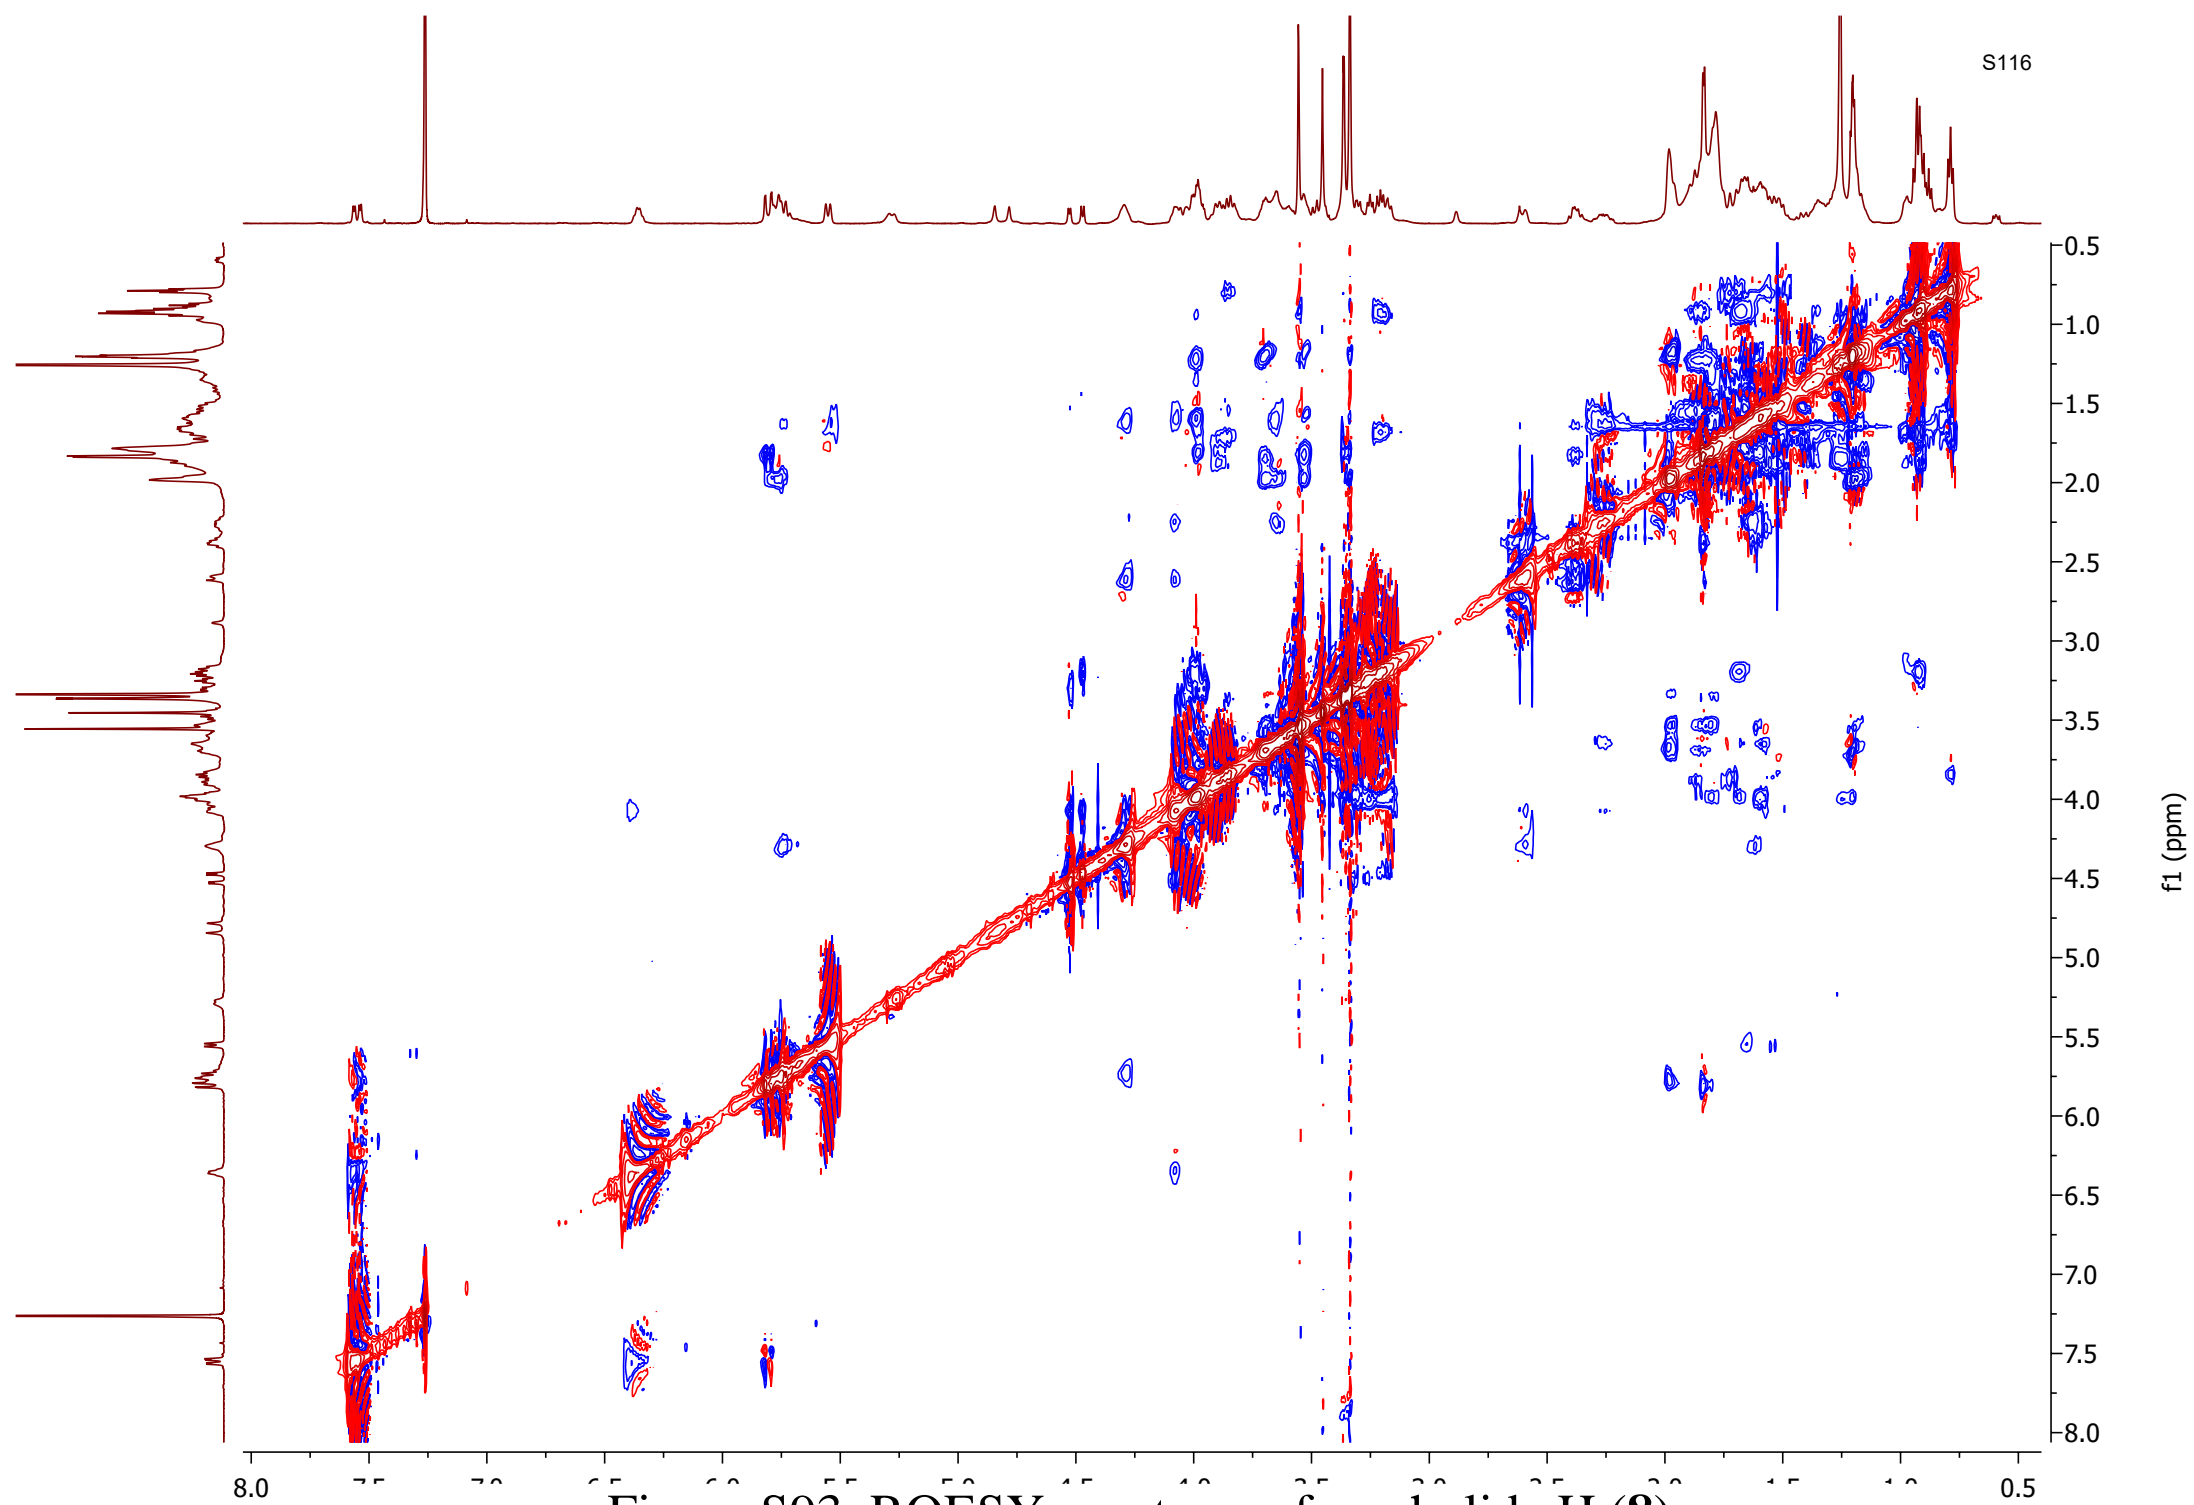

Figure S93 ROESY spectrum of samholide H (8)

2226H3C3-a #13-15 RT: 0.34-0.39 AV: 3 SB: 2 0.27-0.29 NL: 1.71E7

F: + c Full ms [200.00-2000.00]

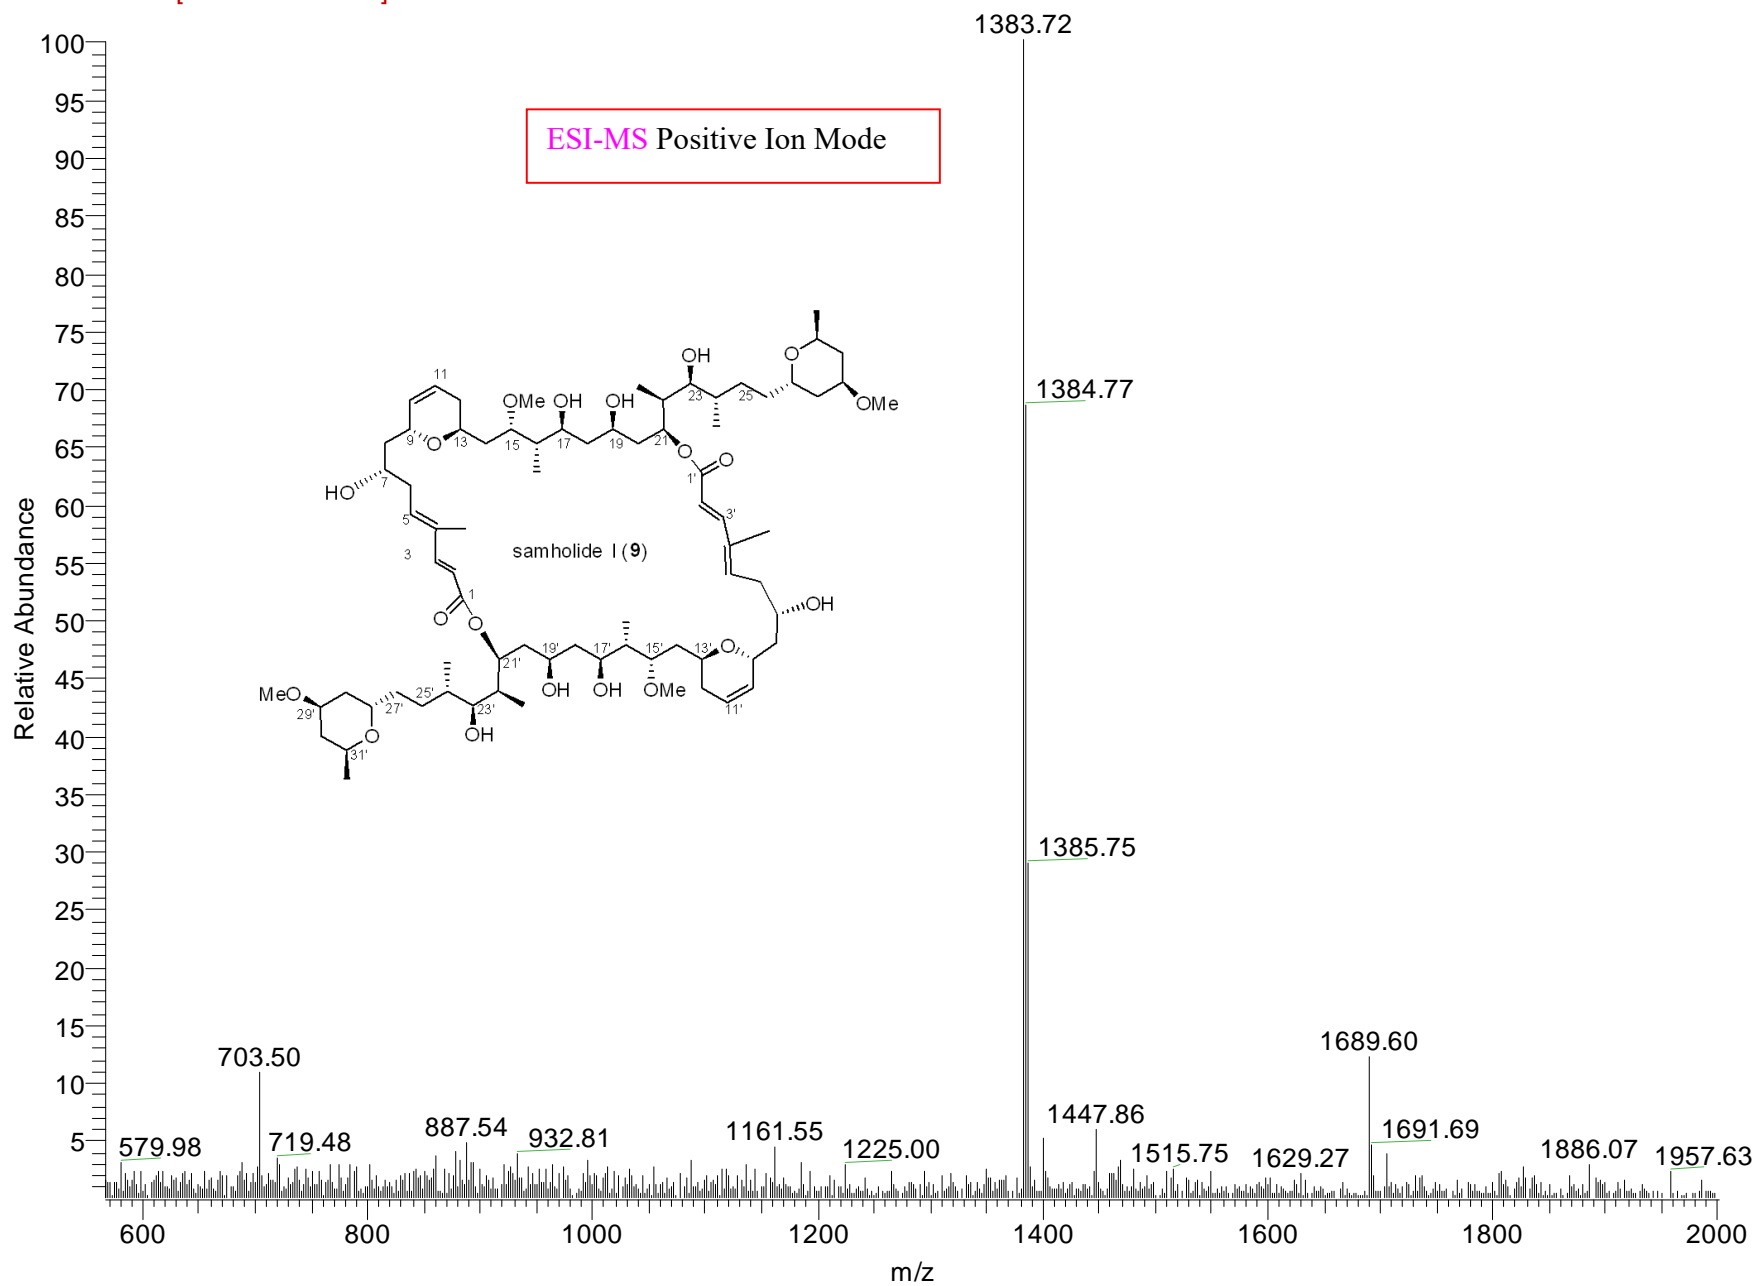

Figure S94 The ESI MS spectrum of samholide I (9)

2226H3C3-a #31-34 RT: 0.73-0.77 AV: 4 NL: 8.51E6

F: + c Full ms2 1384.00@35.00 [380.00-1400.00]

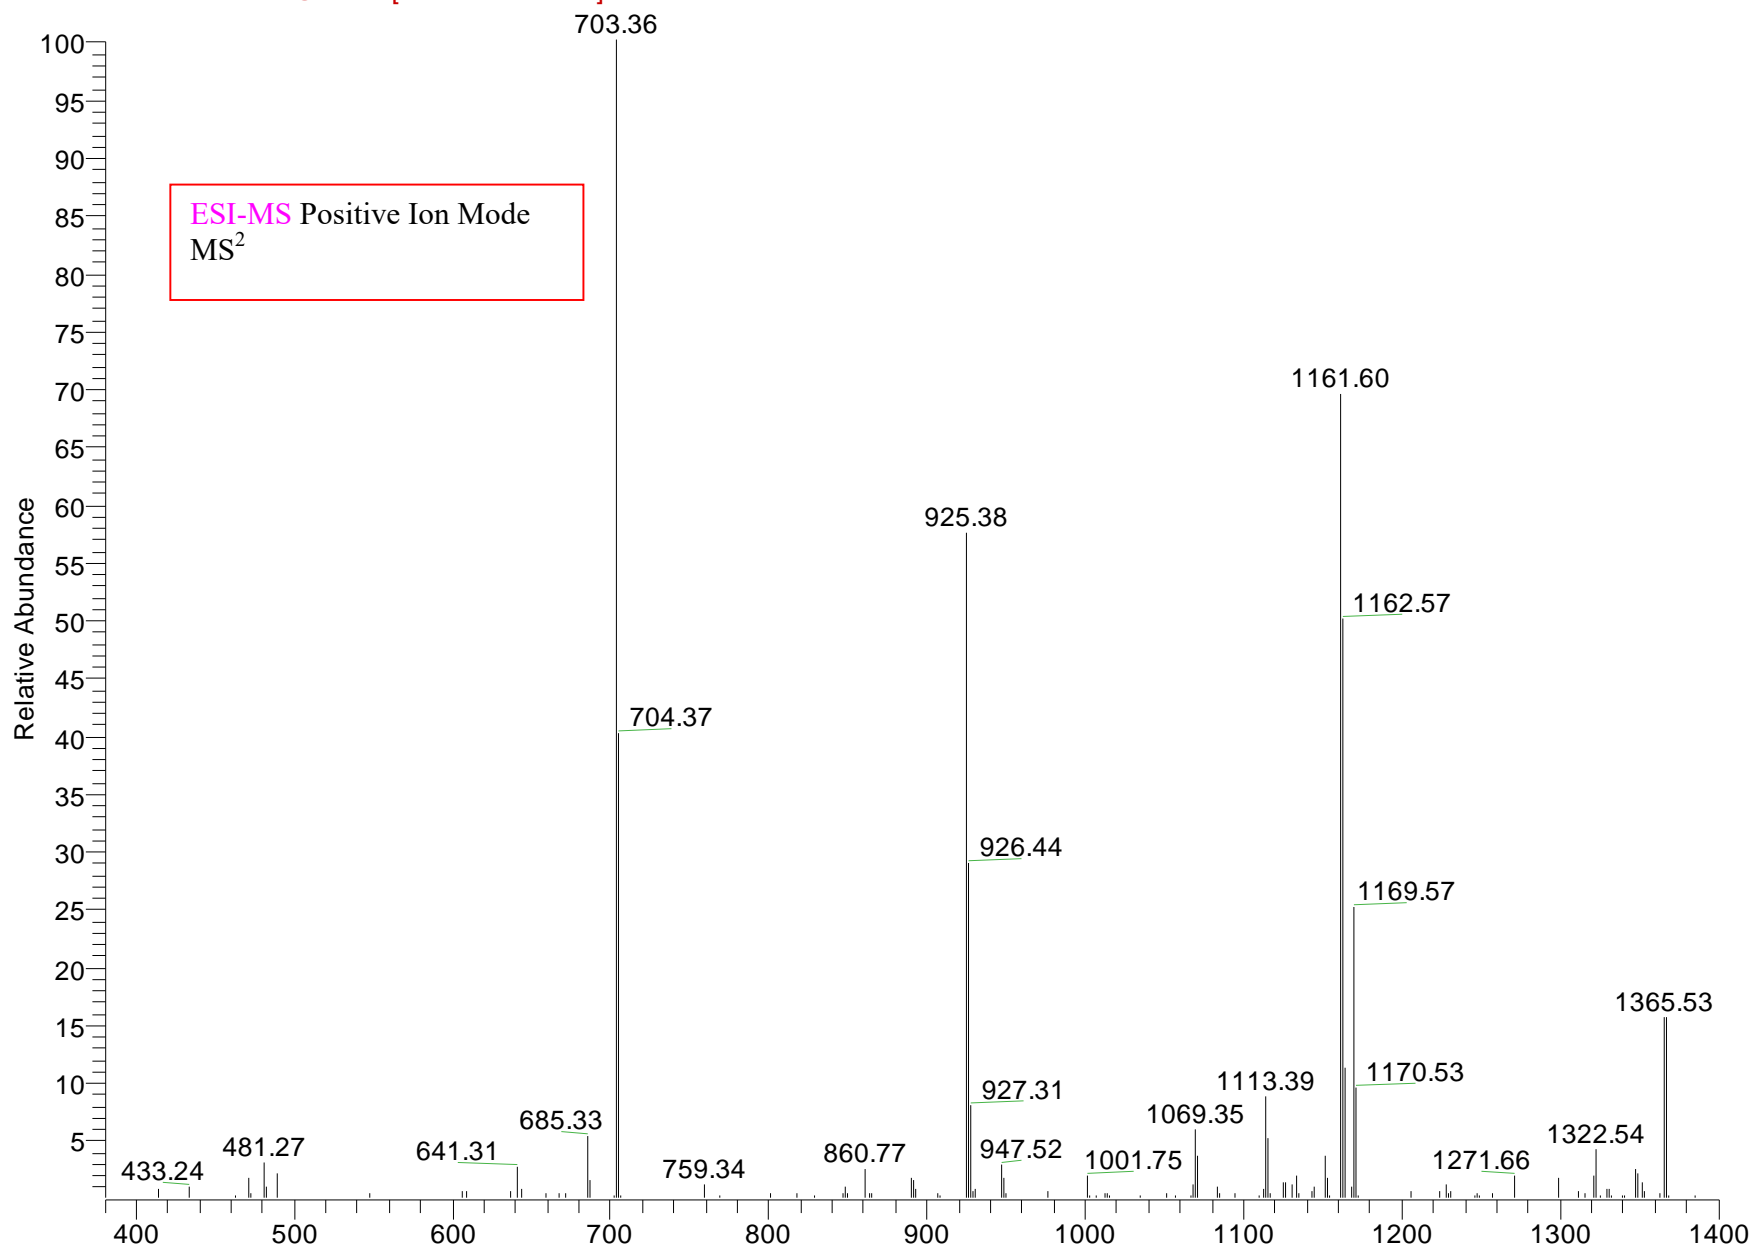Figure S95 The ESI MS<sup>2</sup> spectrum of samholide I (9)

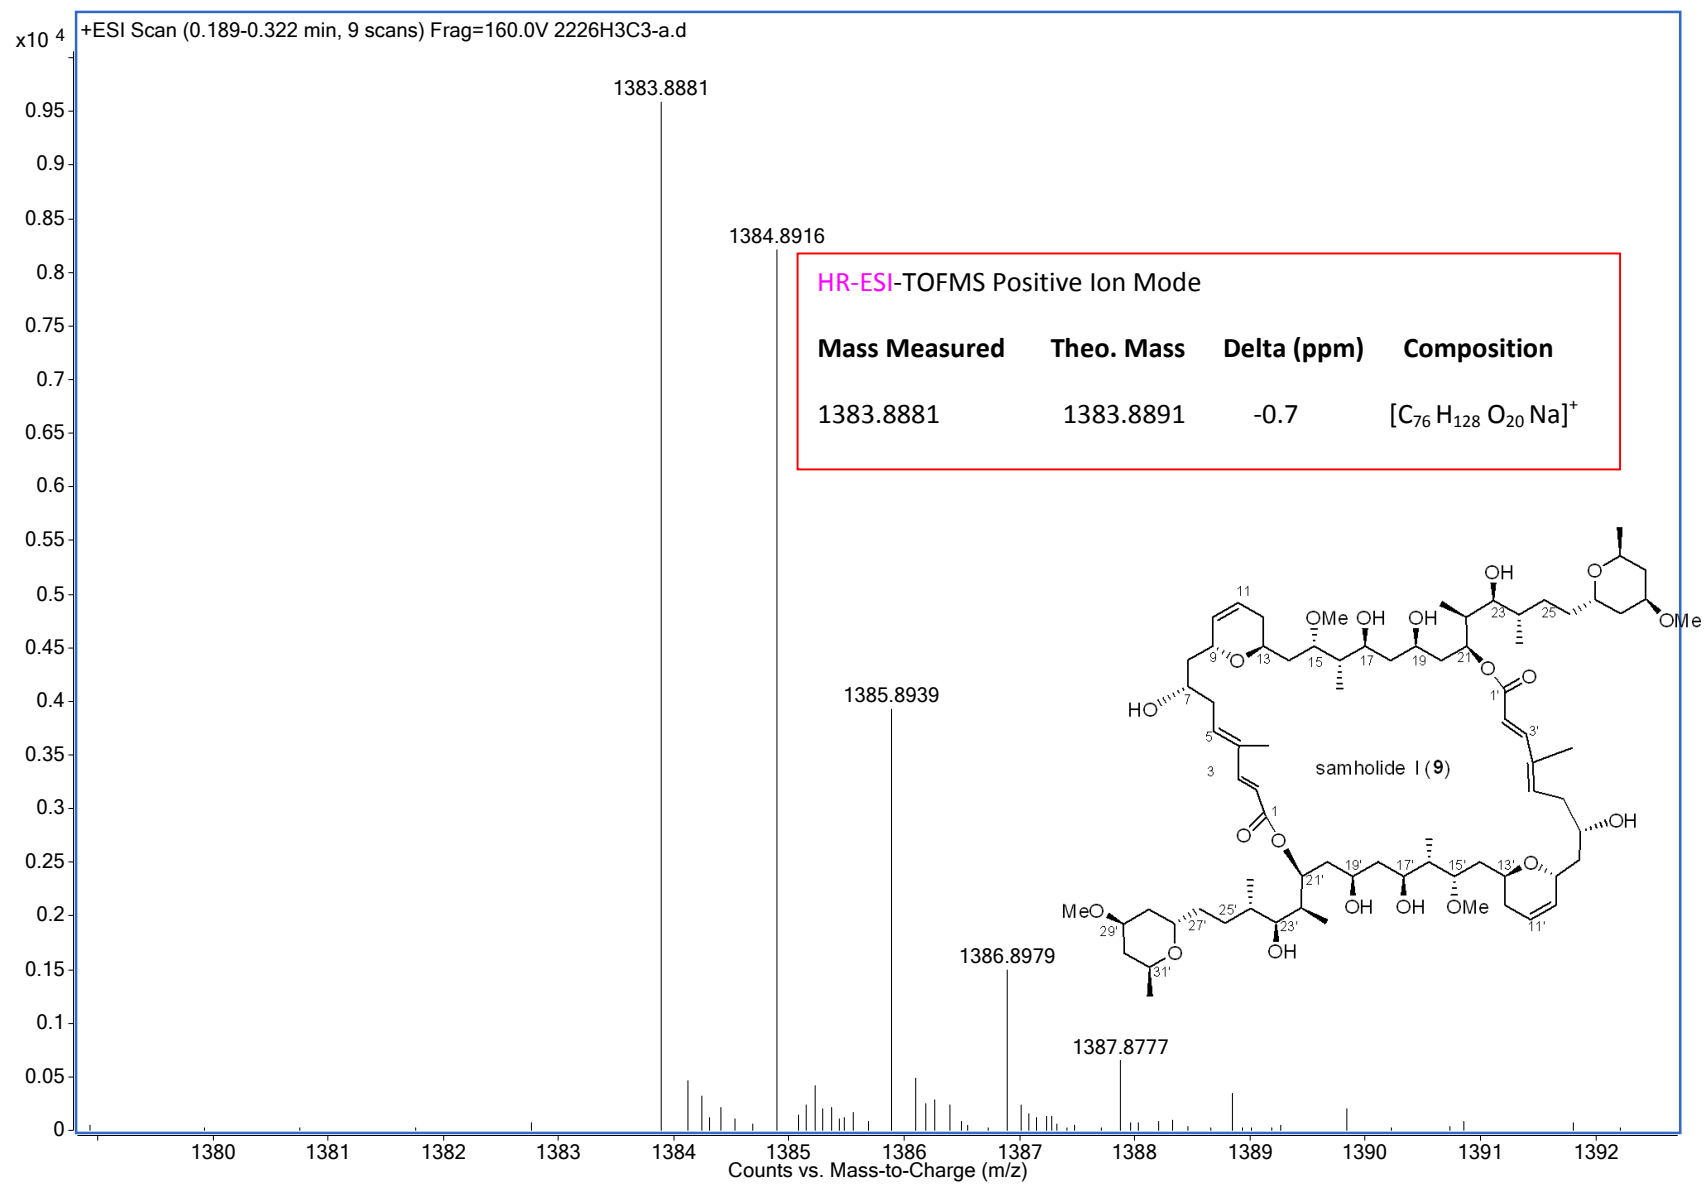

Figure S96 The positive HRESIMS spectrum of samholide I (9)

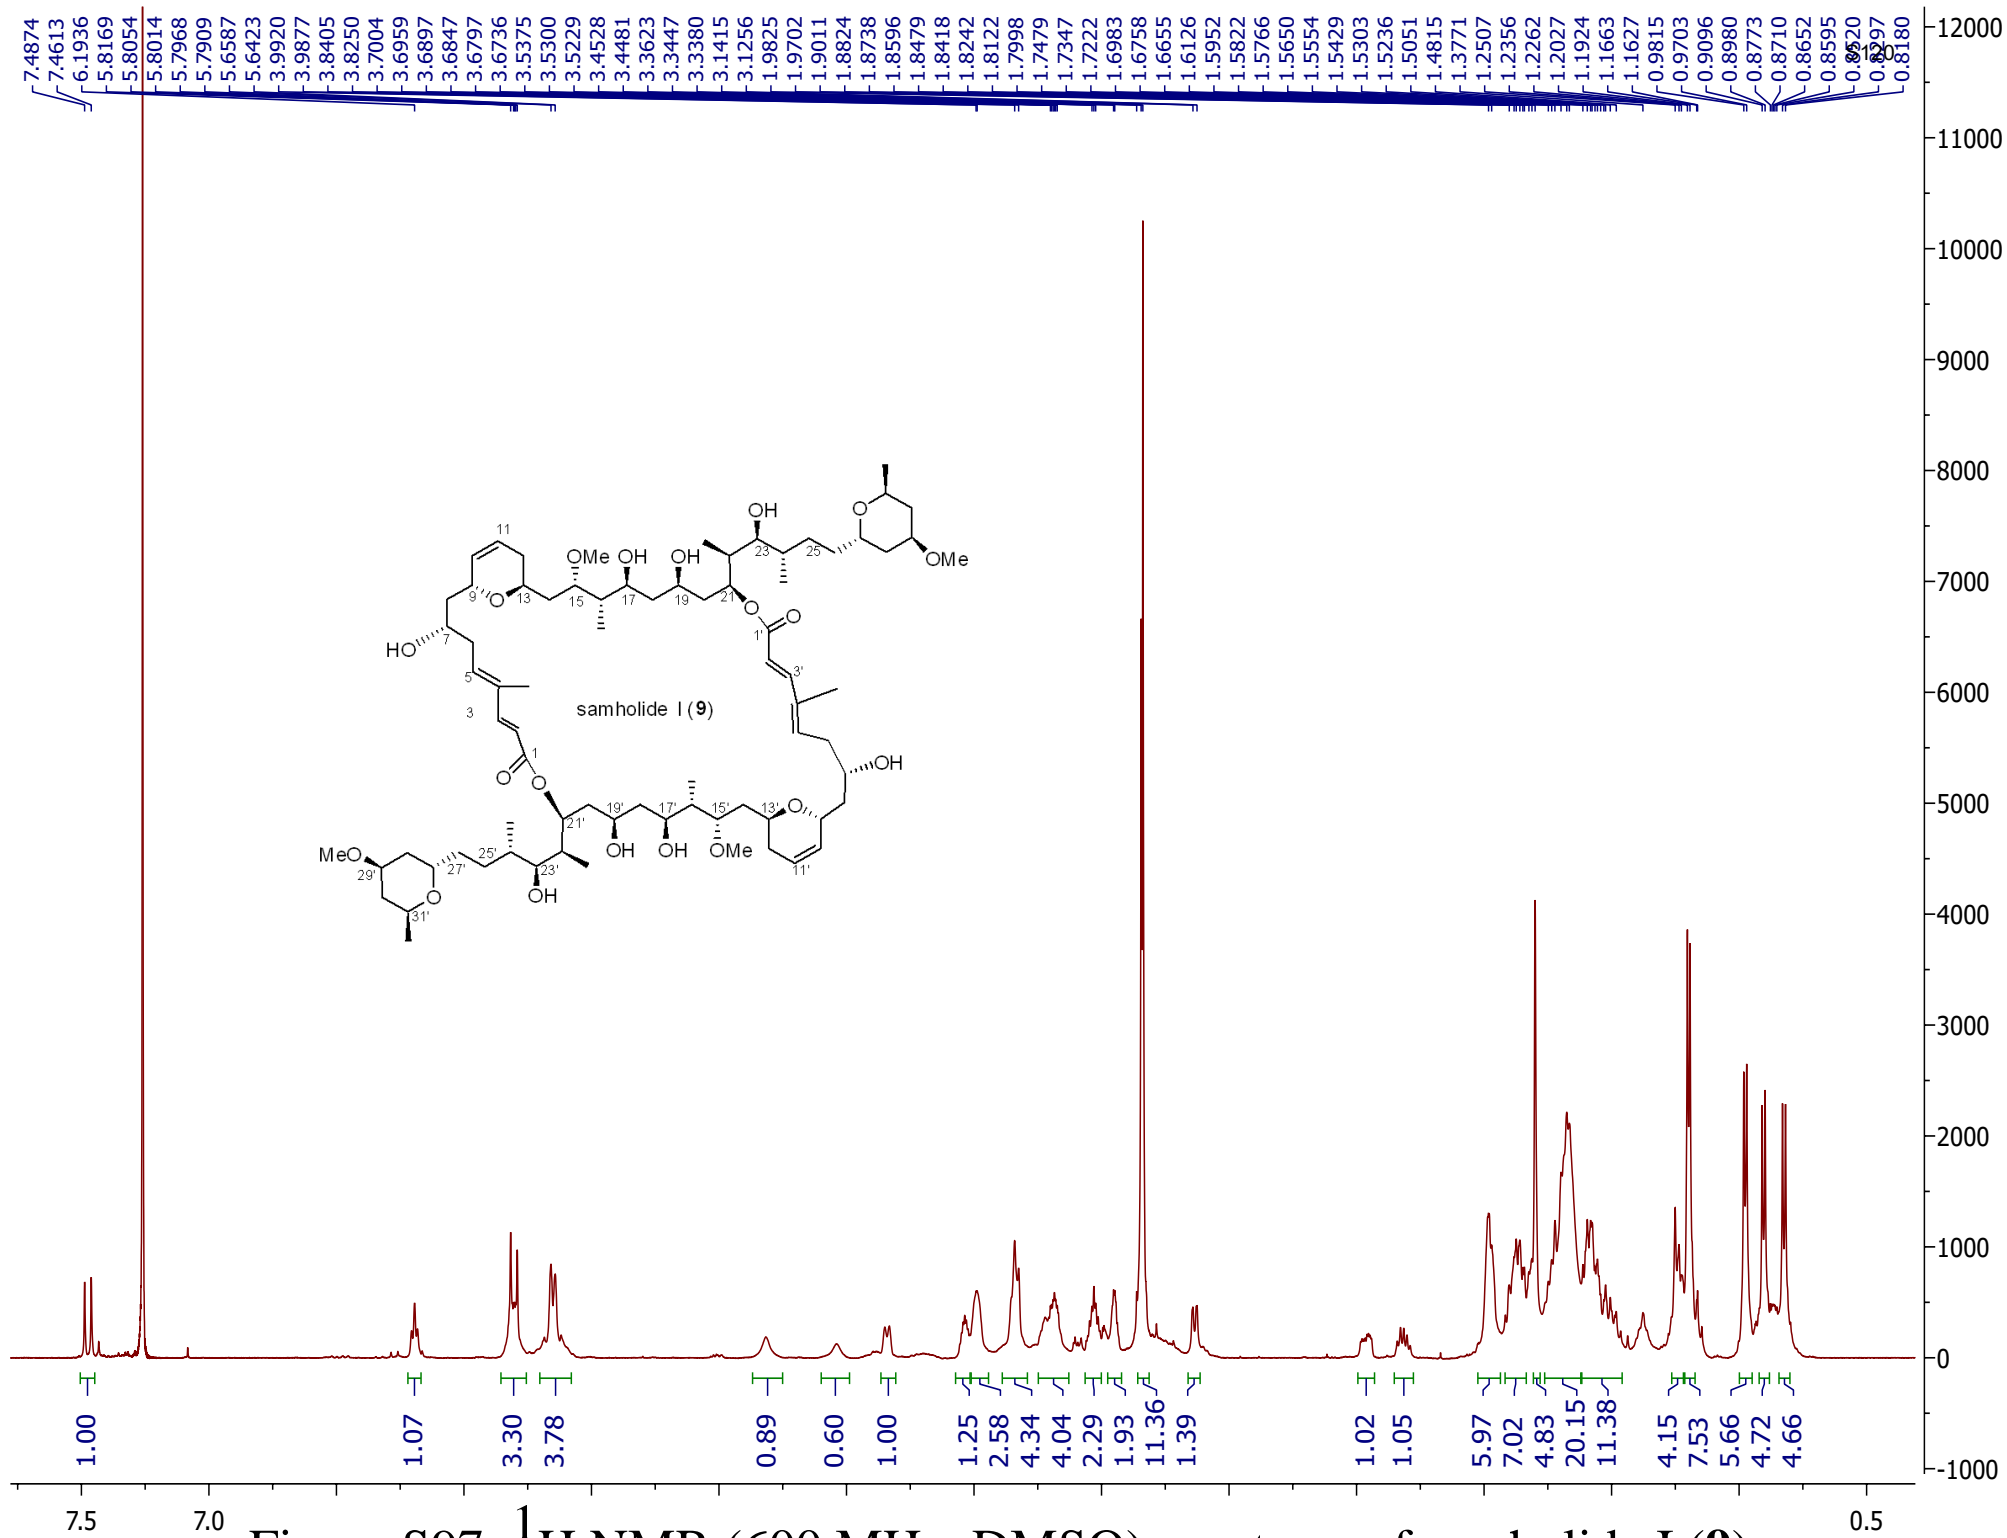



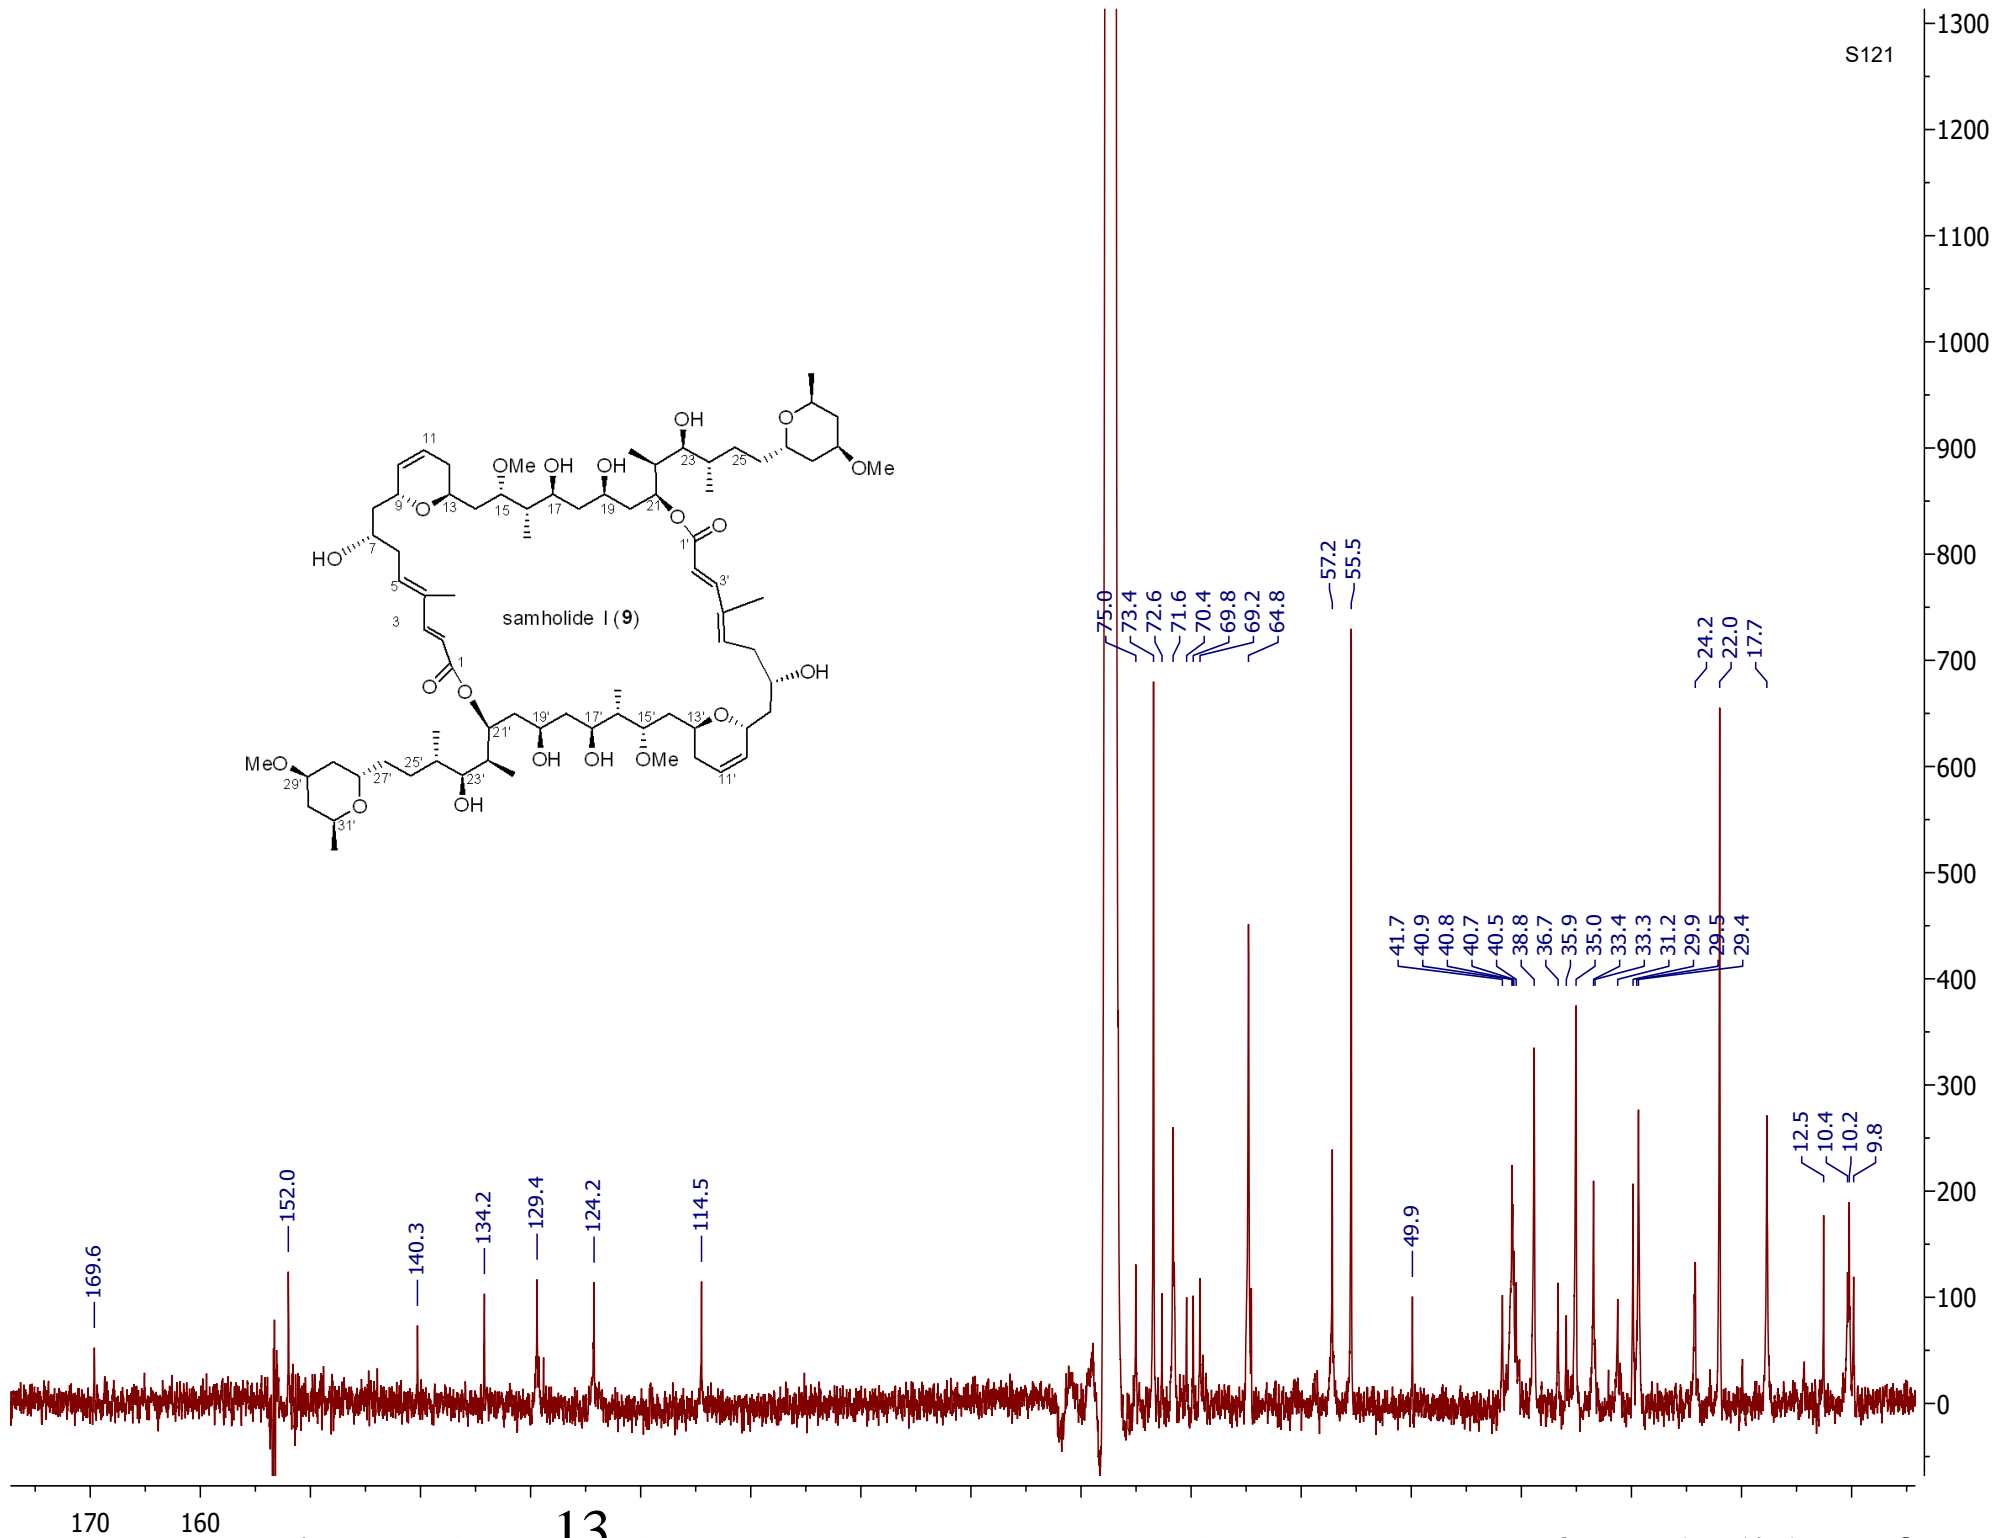

Figure S98  $^{13}\text{C}$  NMR (150 MHz, DMSO) spectrum of samholide I (9)

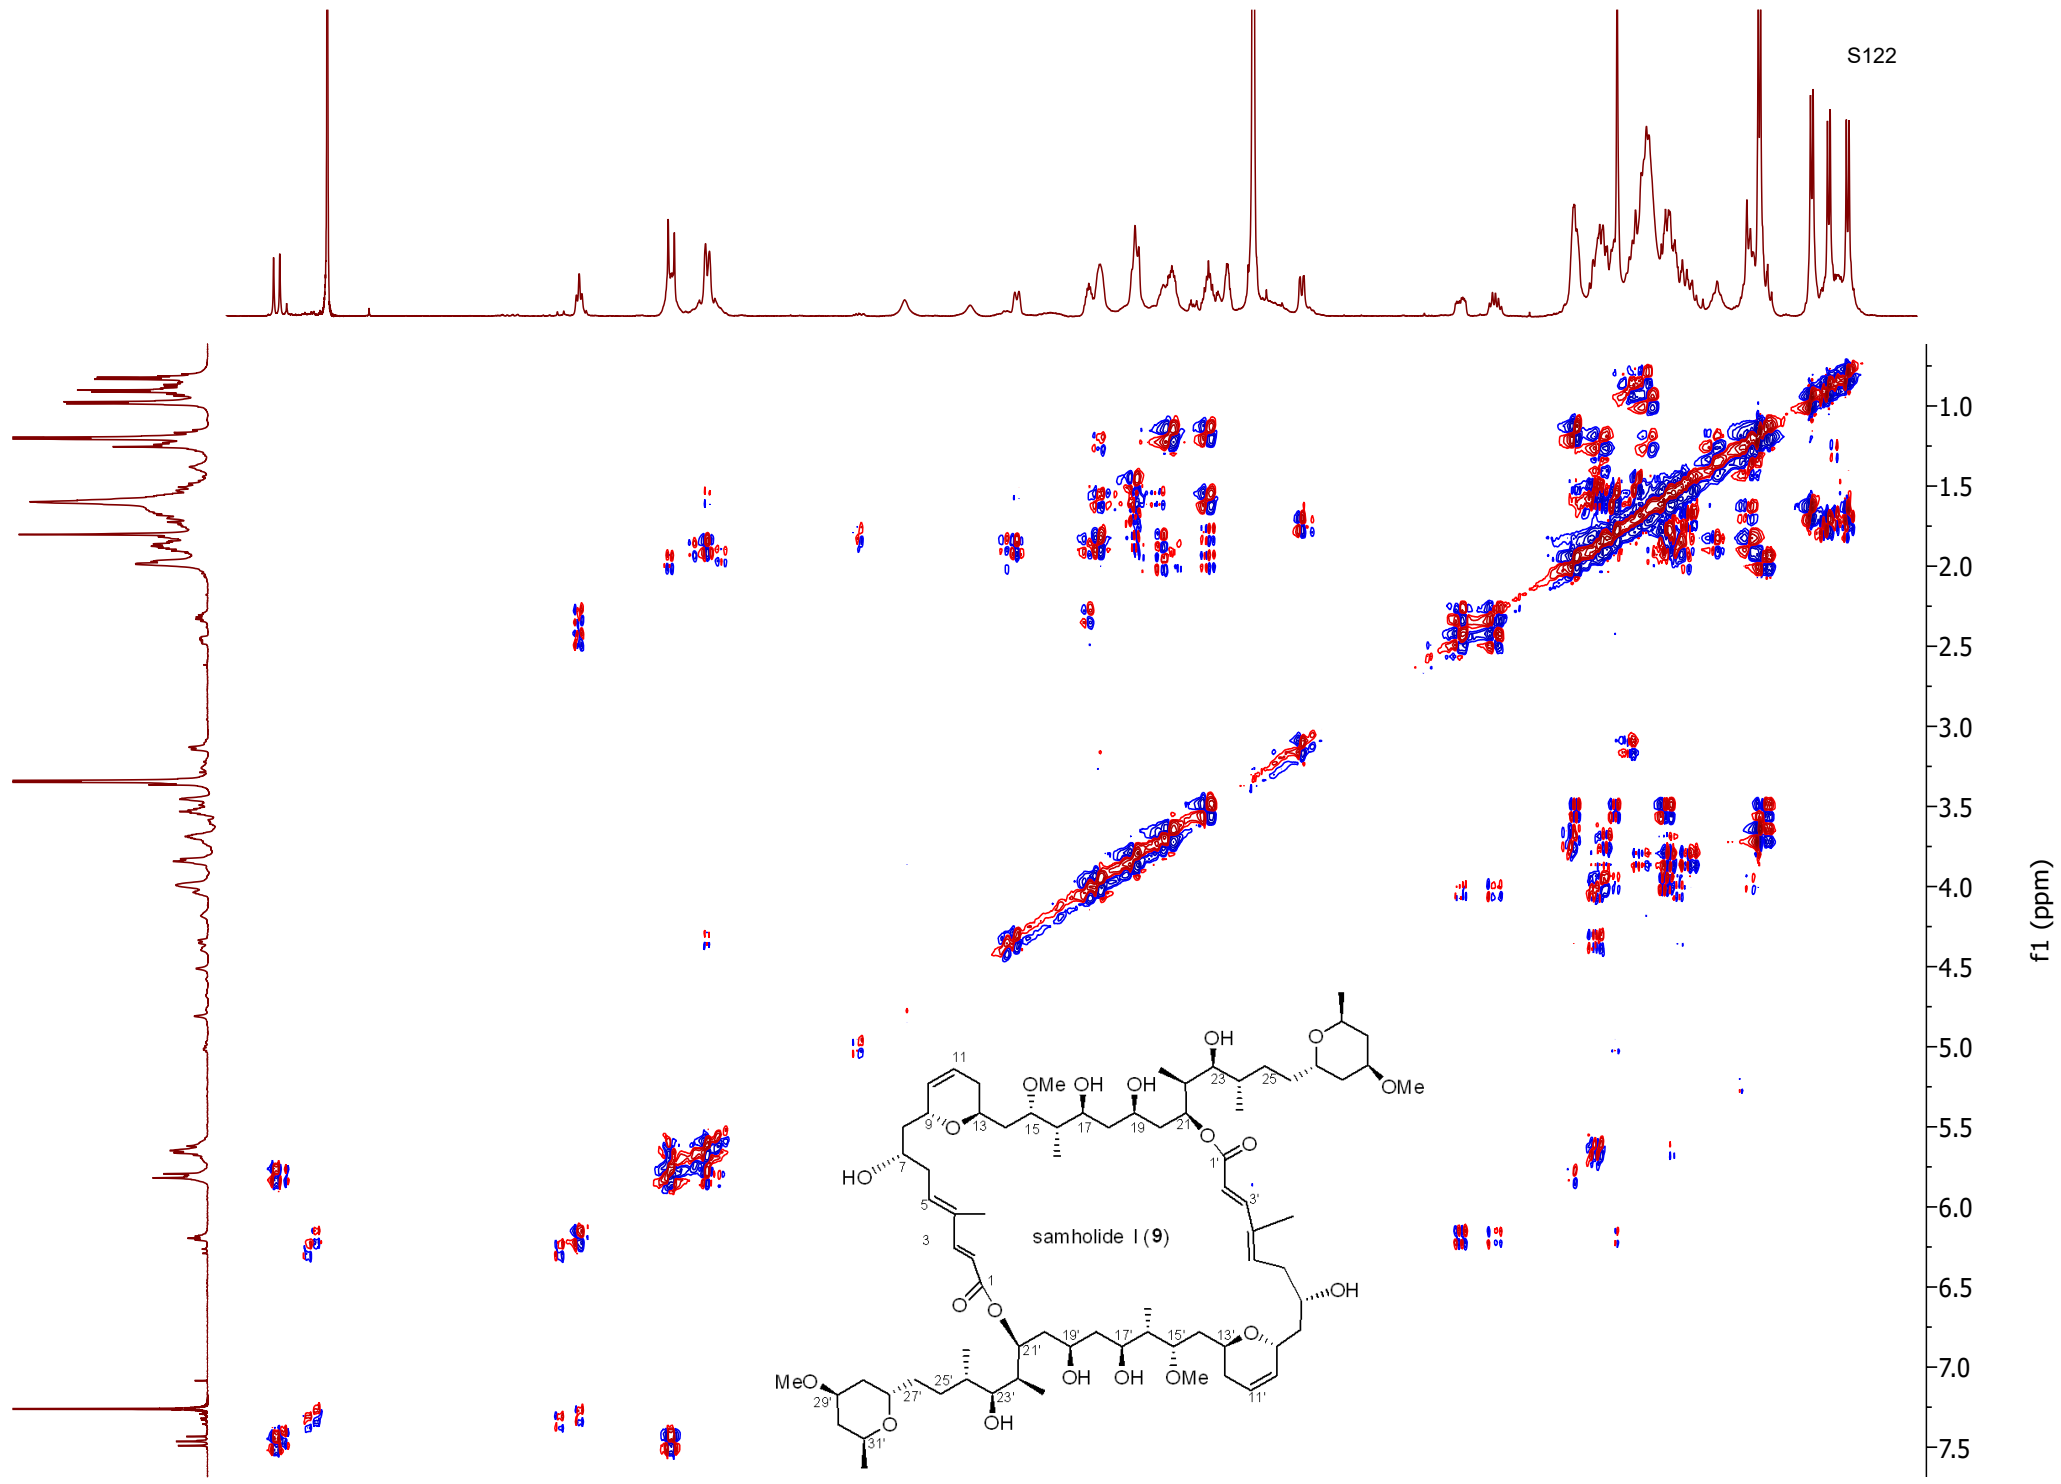

Figure S99  $^1\text{H}$ - $^1\text{H}$  COSY spectrum of samholide I (9)

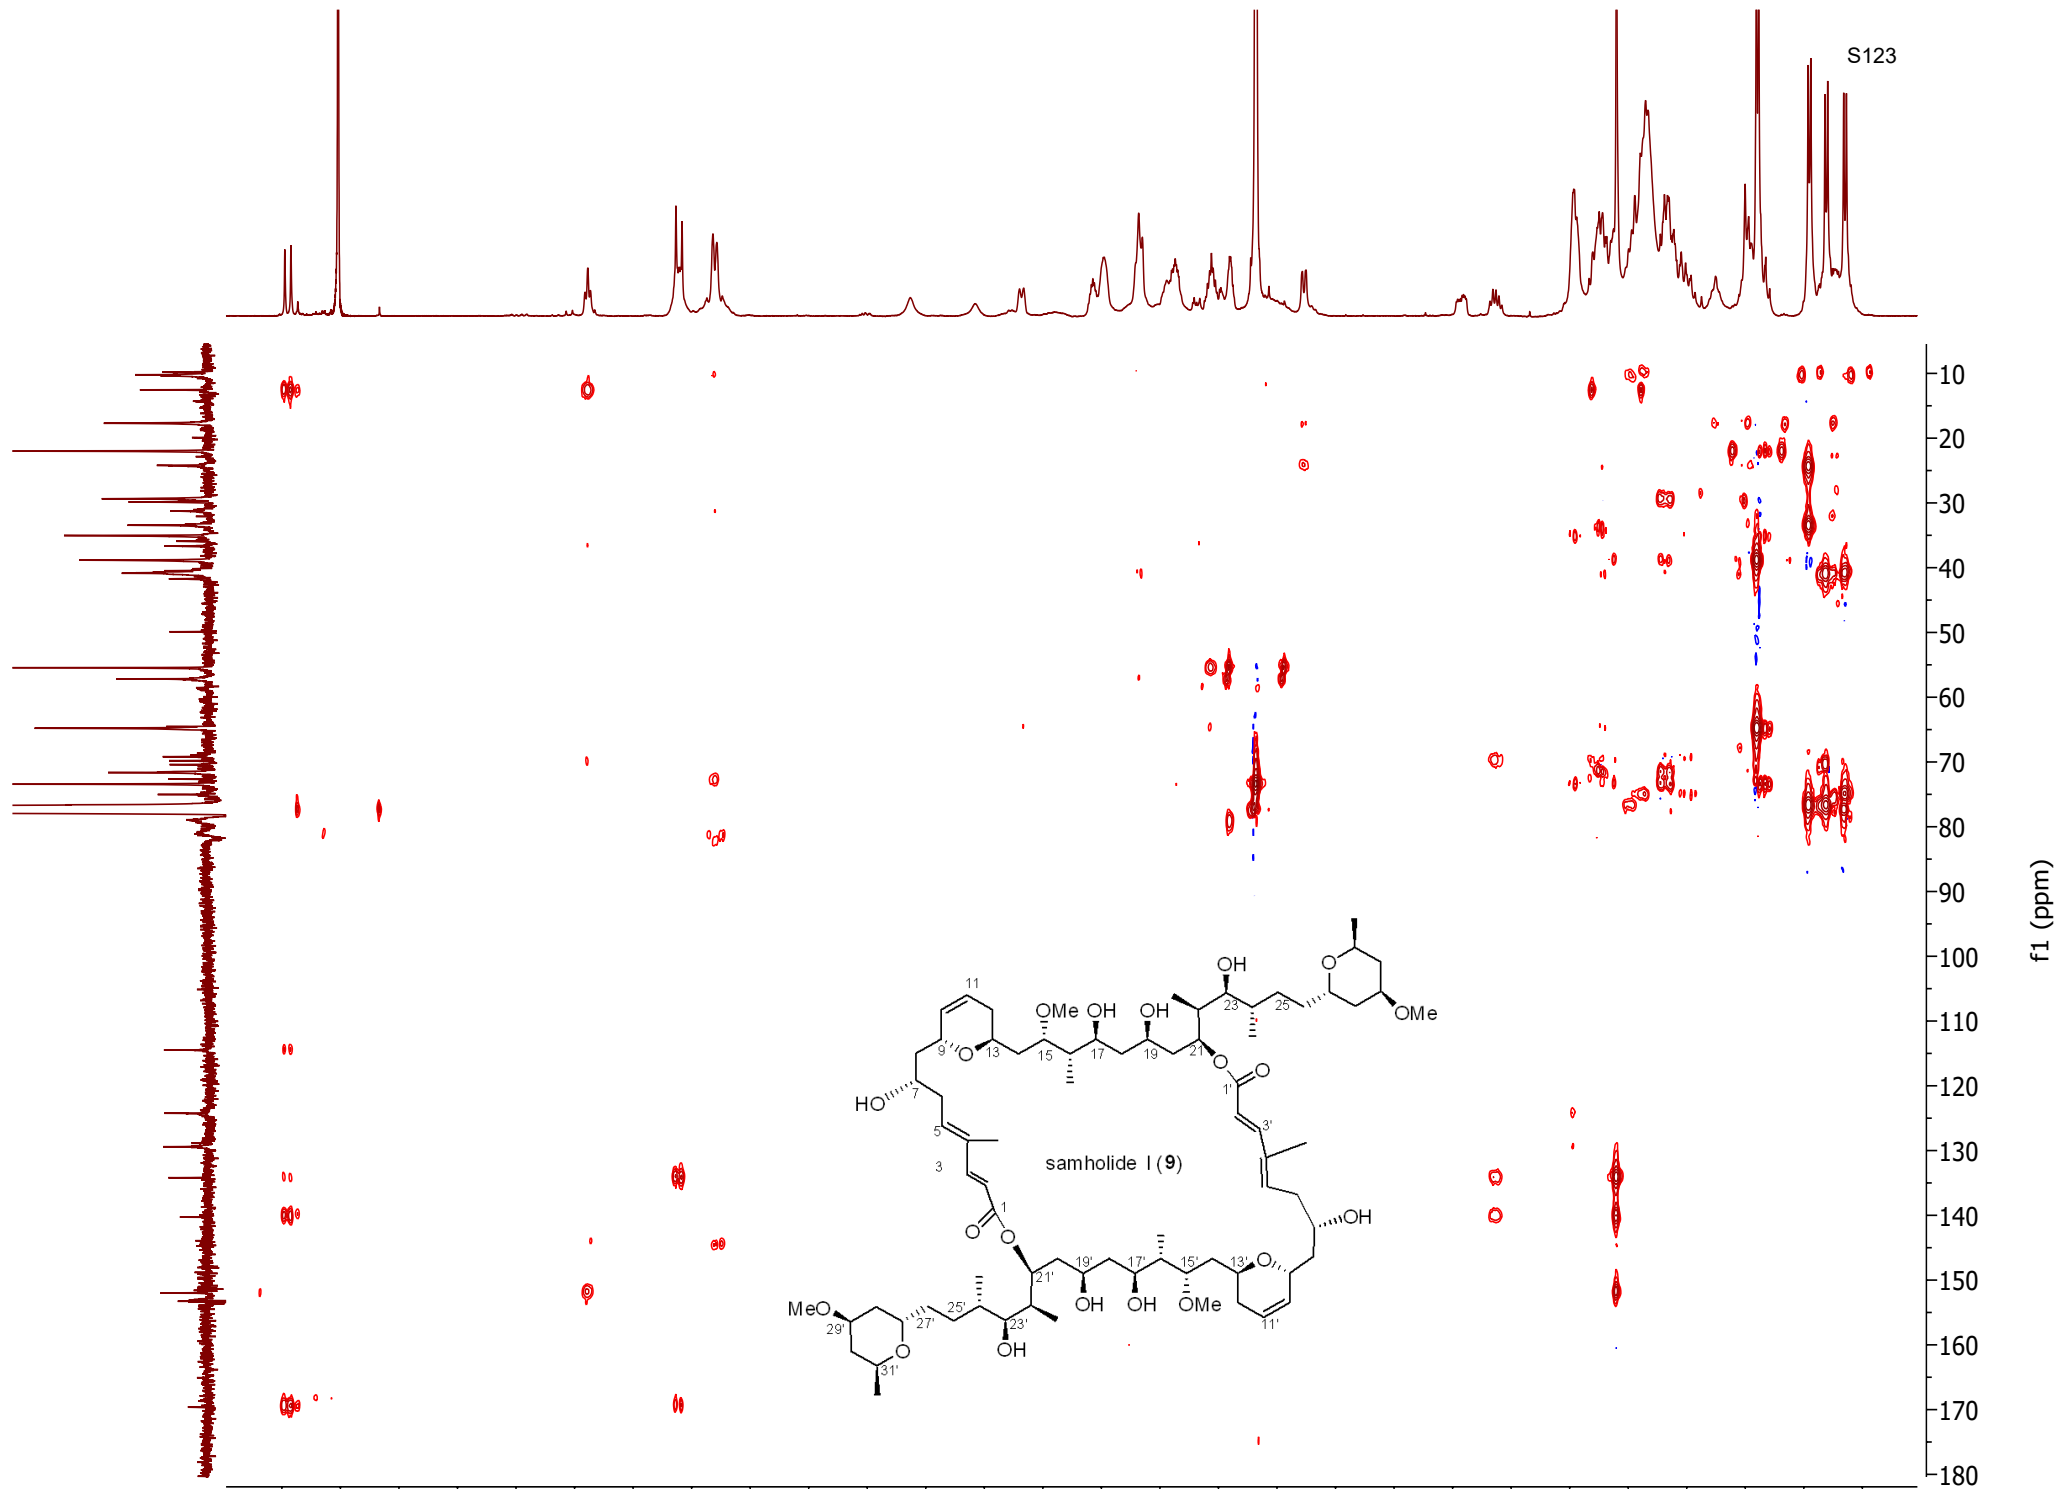

Figure S100 HMBC spectrum of samholide I (9)

S124

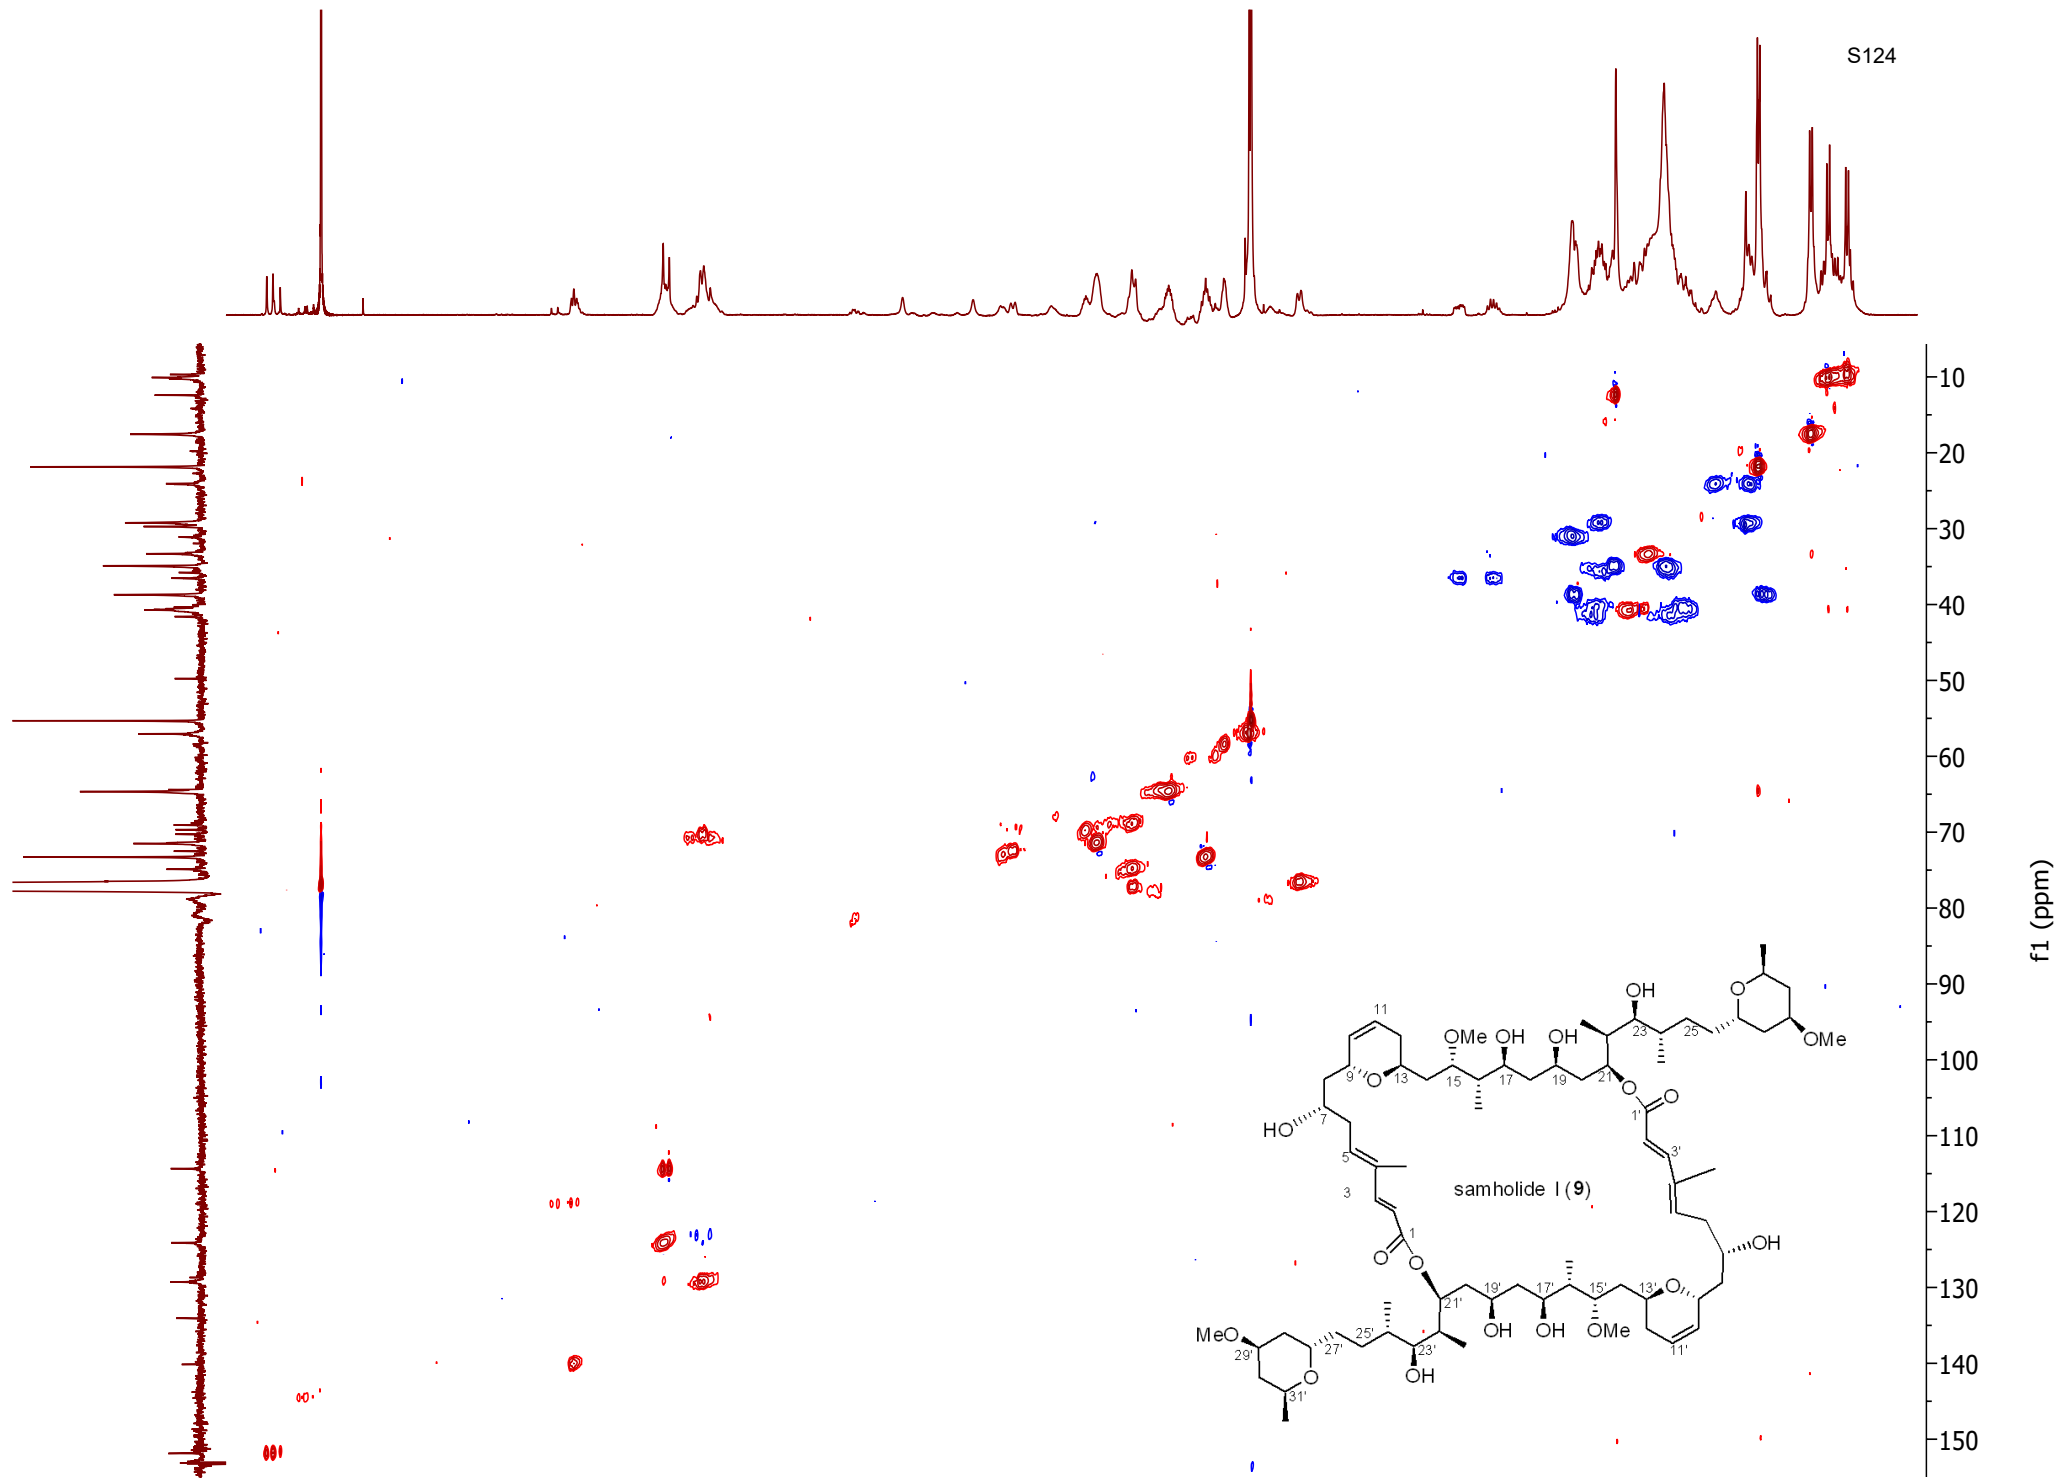

Figure S101 HMQC spectrum of samholide I (9)

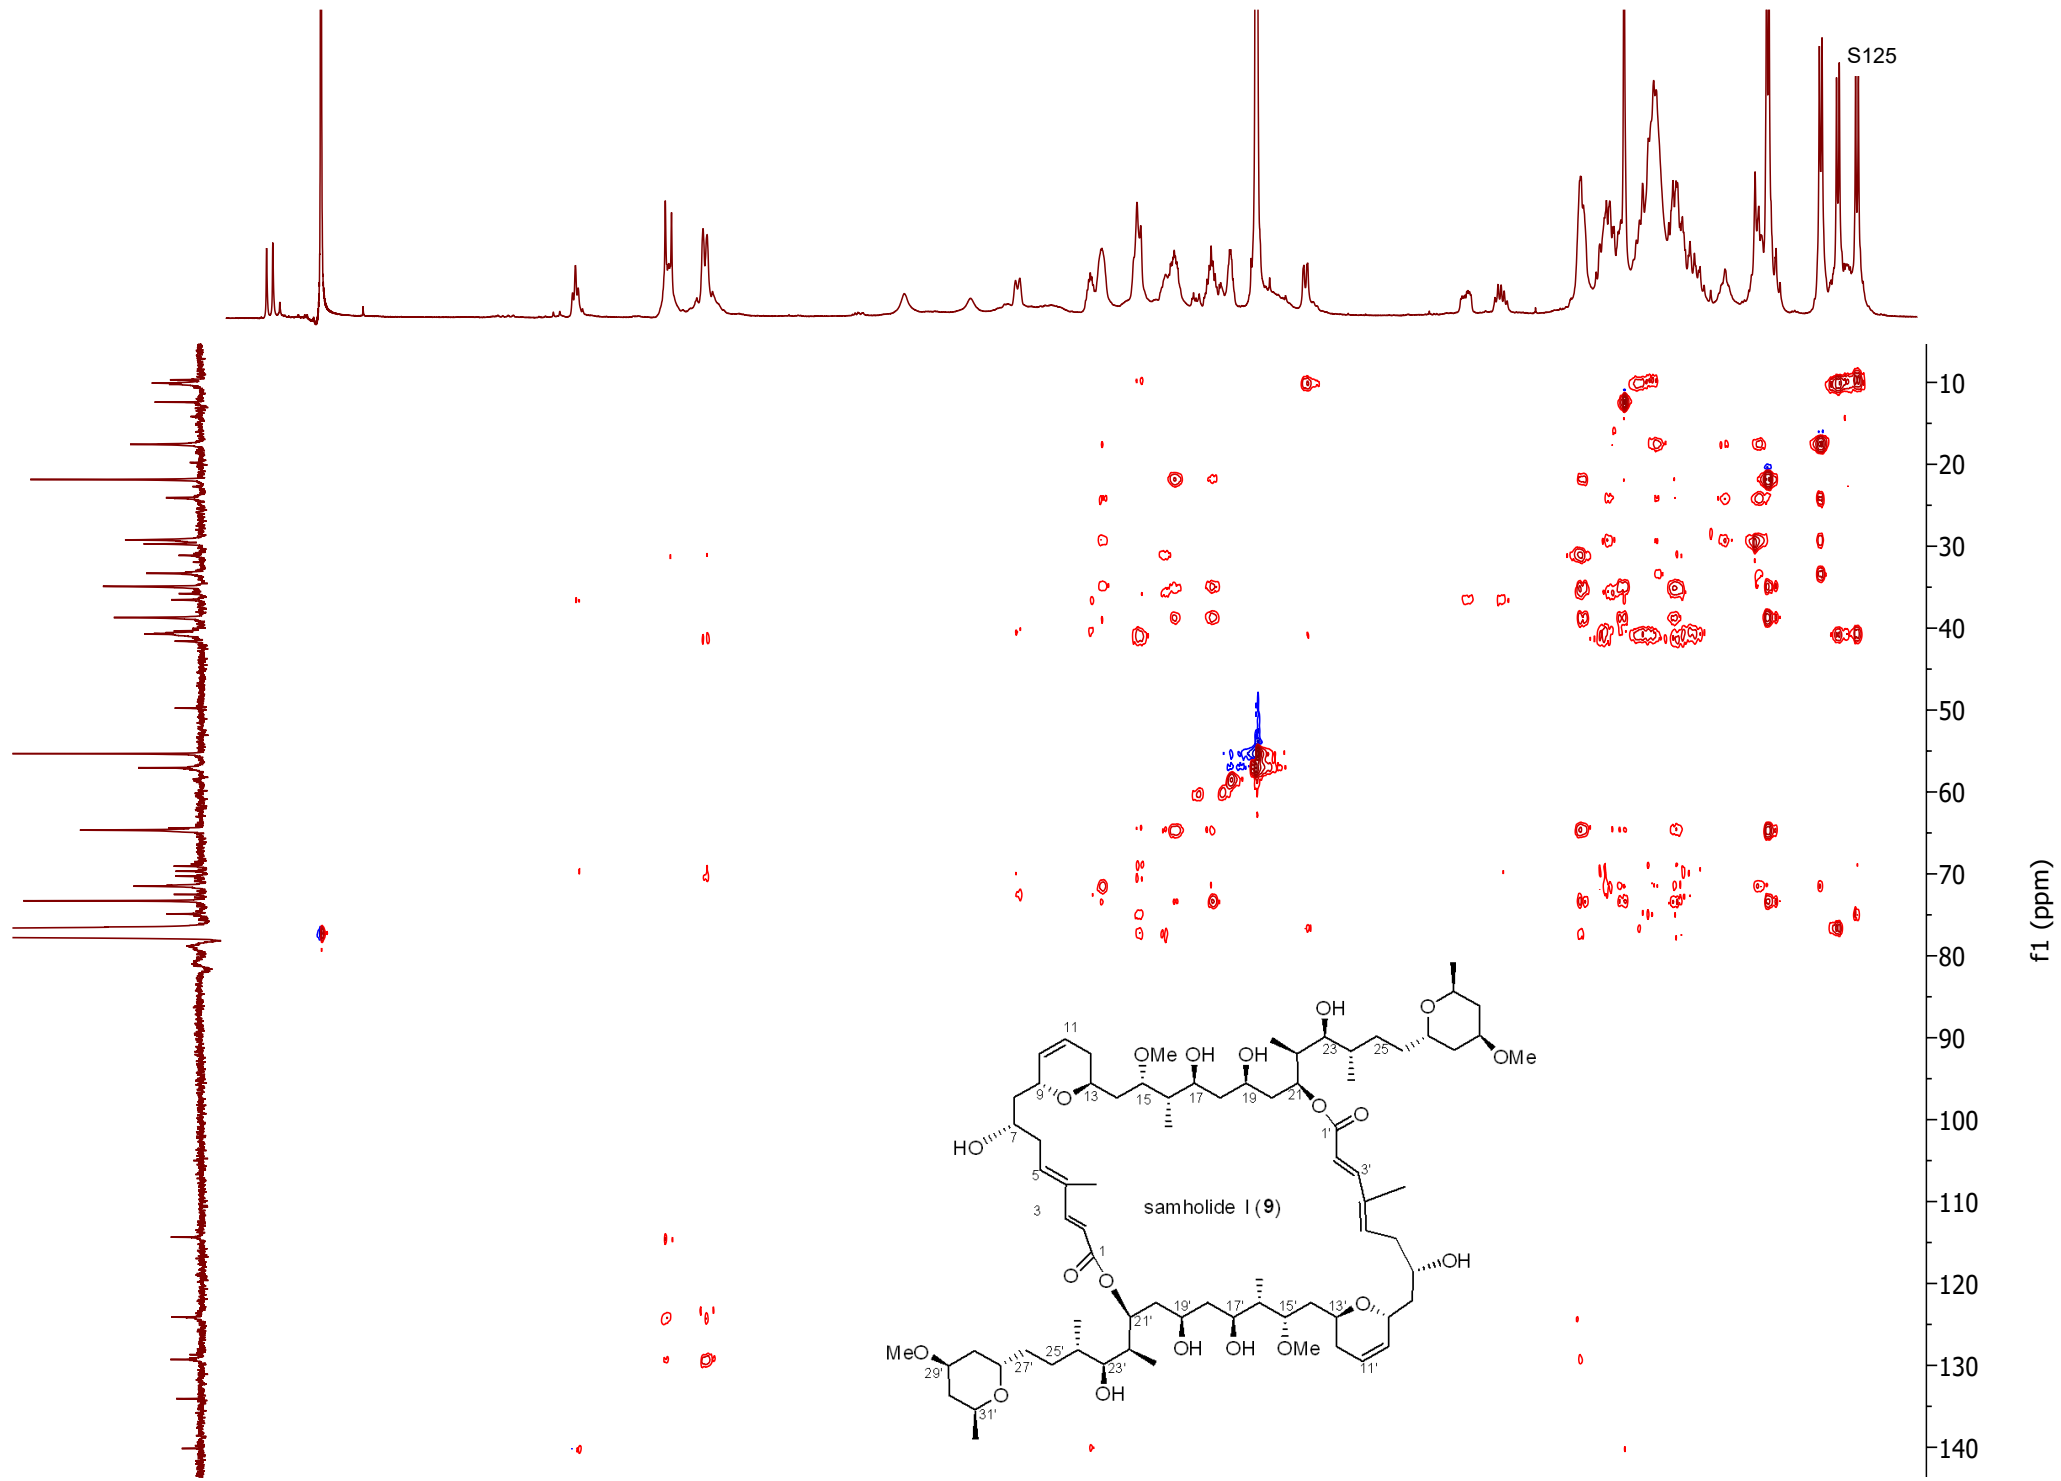

Figure S102 HSQC-TOCSY spectrum of samholide I (9)

S126

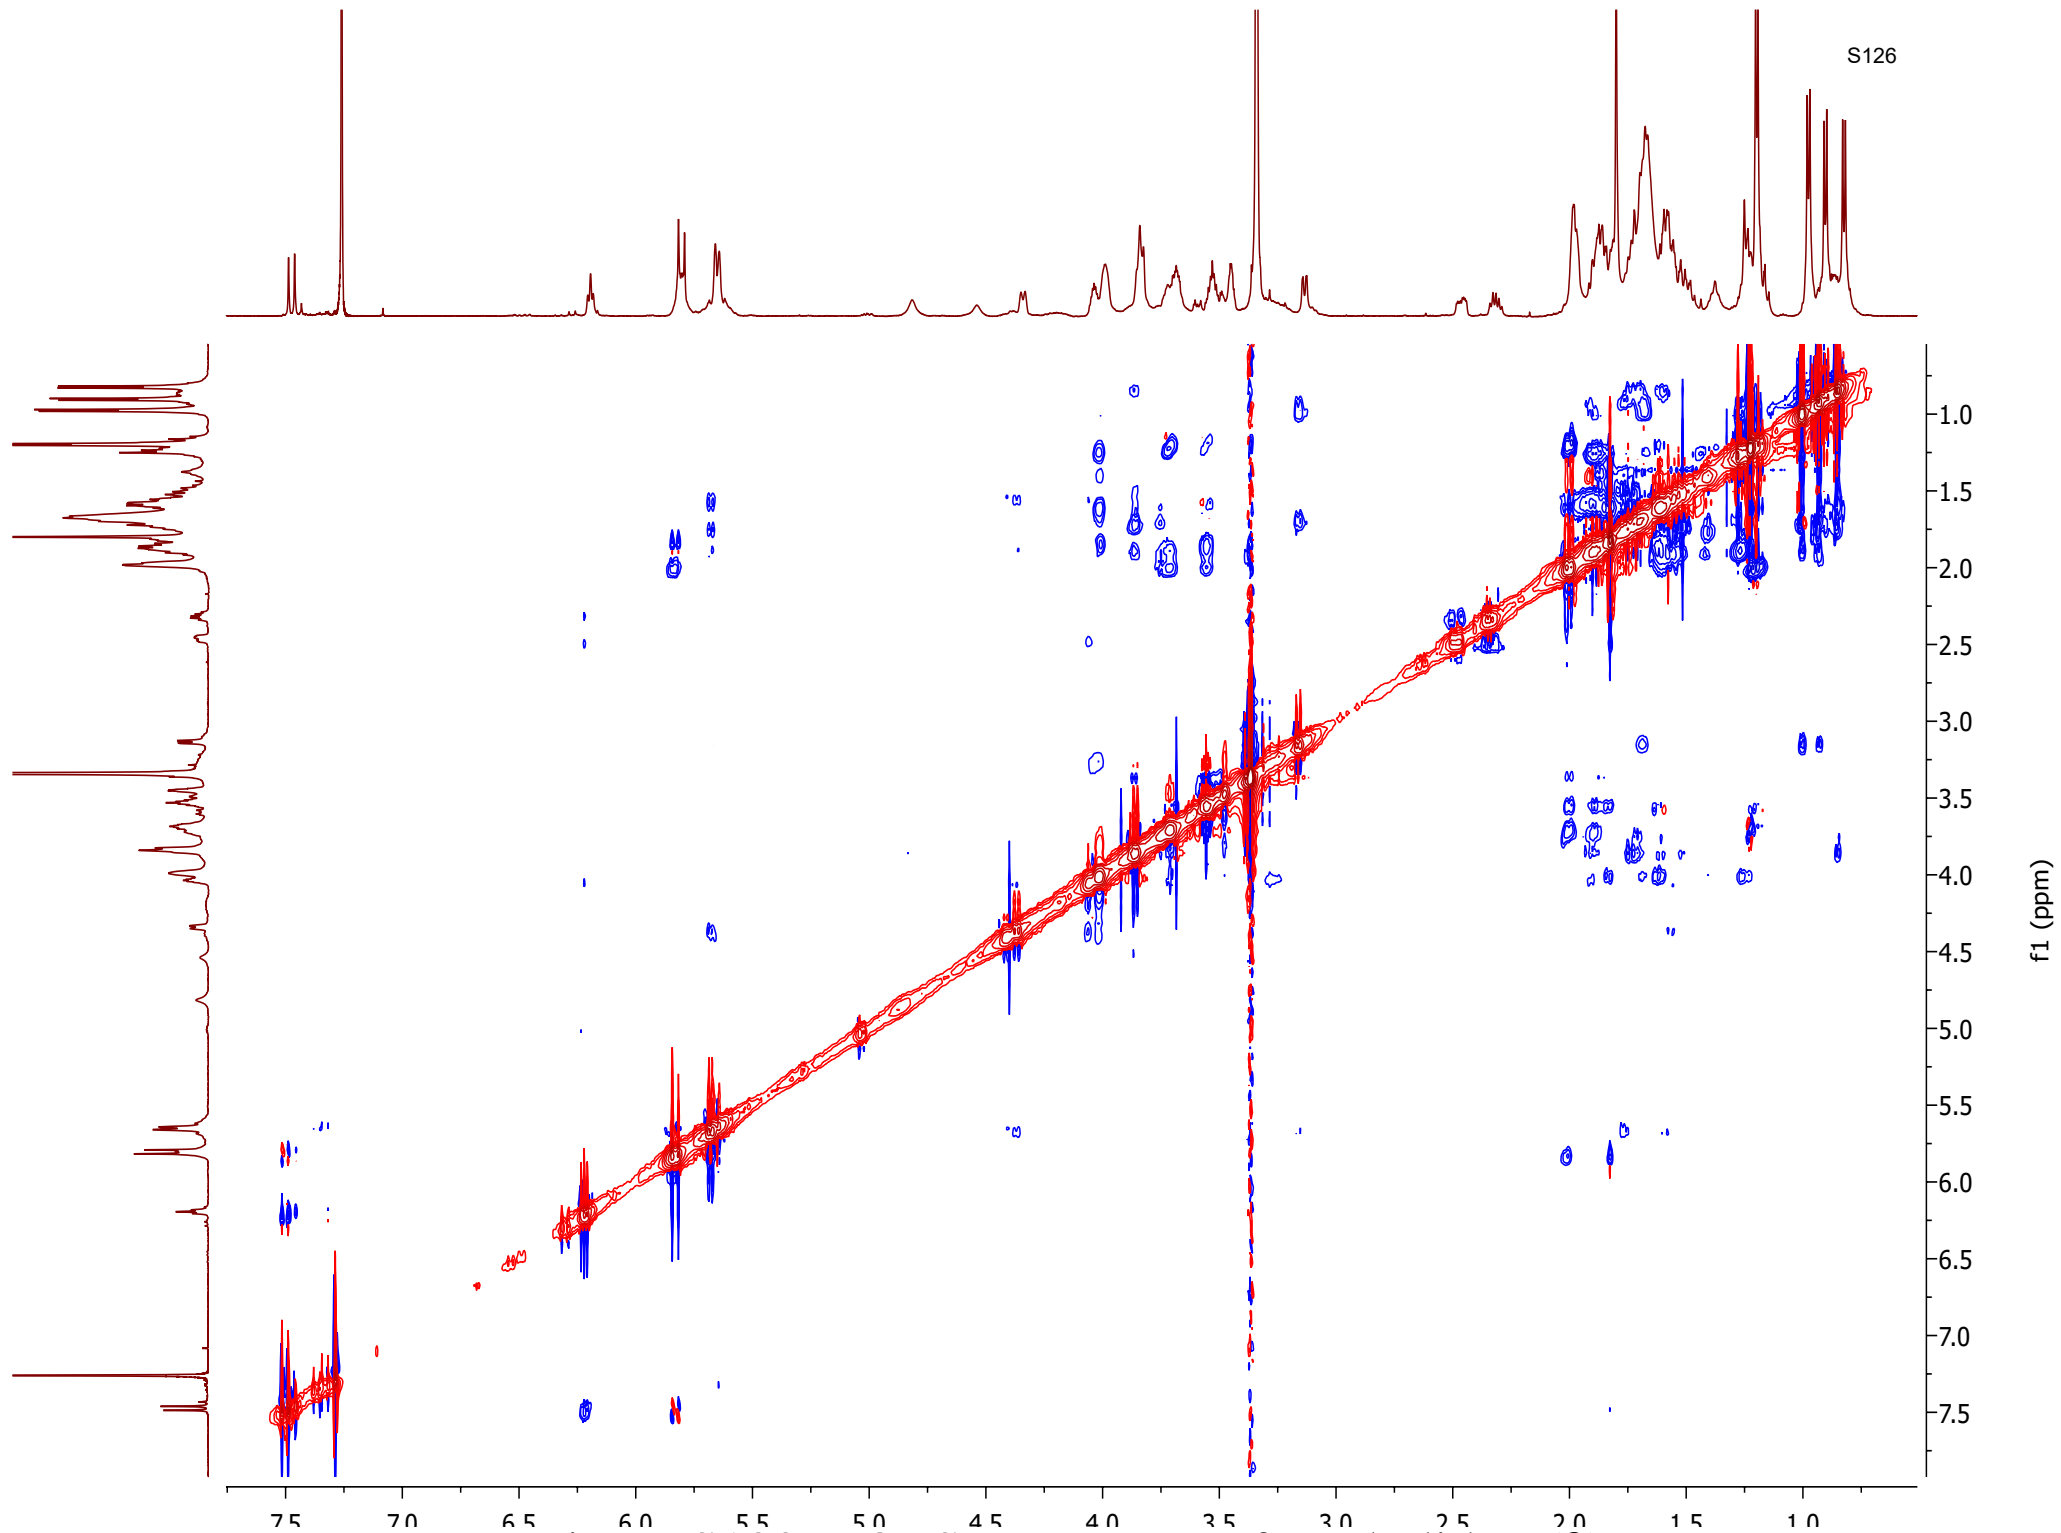

Figure S103 ROESY spectrum of samholide I (9)

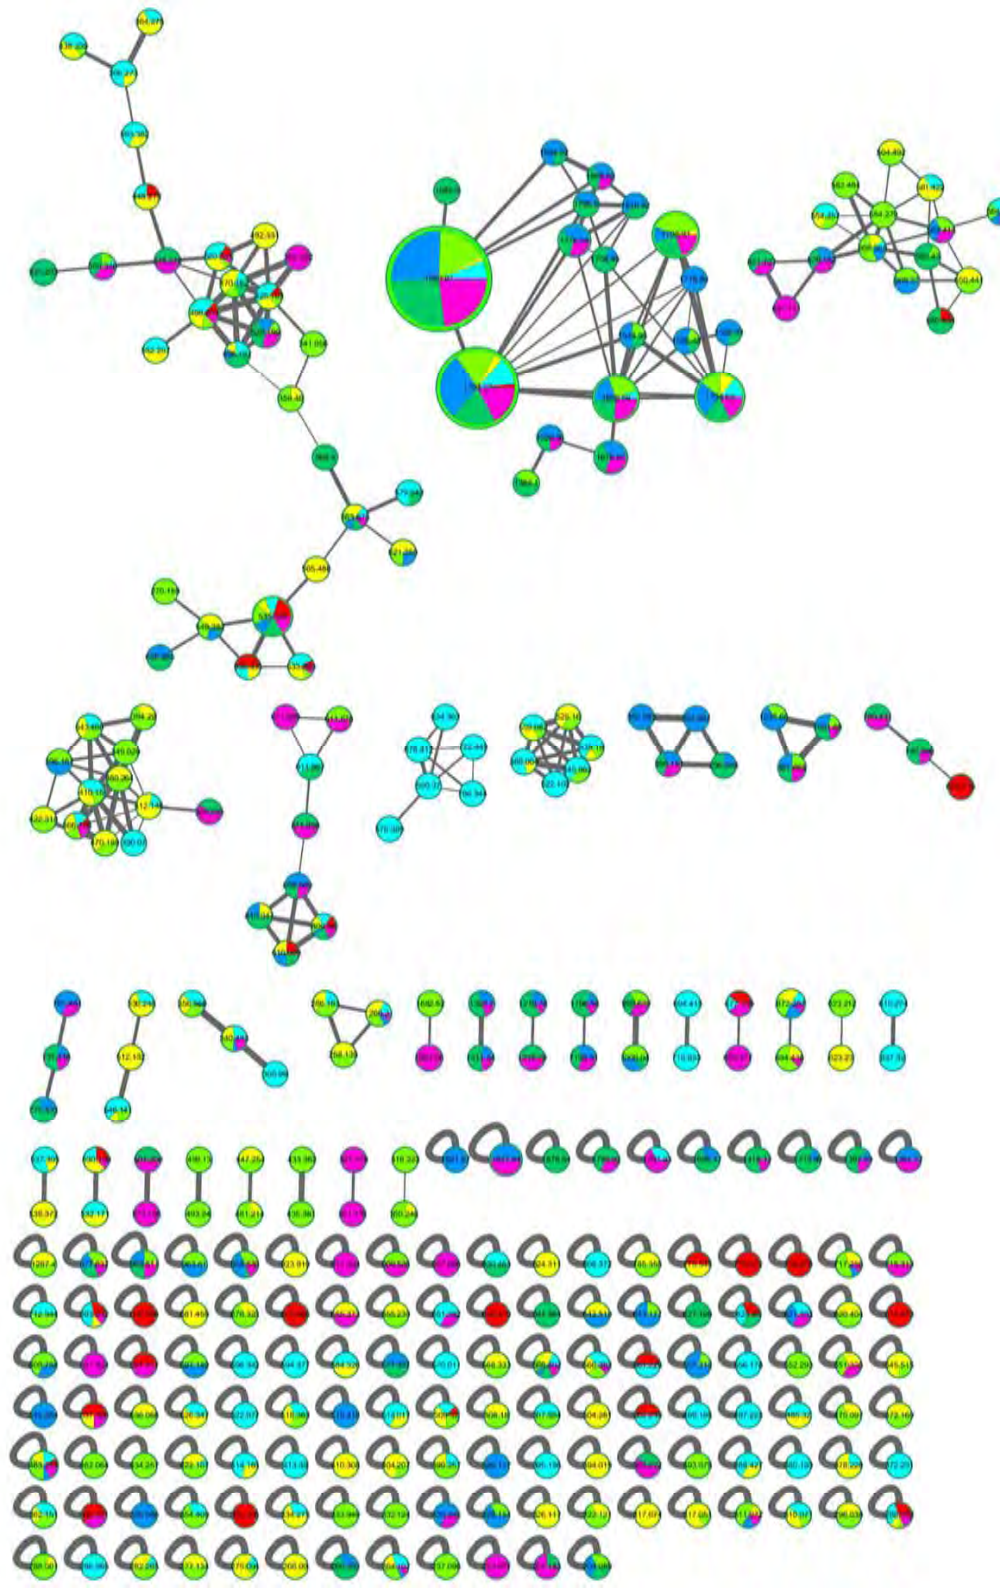

Figure S104 MS<sup>2</sup>-  
based molecular  
networking of fractions  
D-I of cf. *Phormidium*  
sp.
